# Supplementary material for: A Tgfbr1/Snai1-dependent developmental module at the core of vertebrate axial elongation
Source: eLife. 2020 Jun 29;9:e56615. doi: 10.7554/eLife.56615 (PMC7324159; doi:10.7554/eLife.56615)
Supplement: Figure 1—source data 1. [file elife-56615-fig1-data1.xlsx]

## Sheet: EHF-2clusters
GeneID	Gene name	Padj	Cluster
ENSMUSG00000000303	Cdh1	1.53583708571465e-06	1
ENSMUSG00000000805	Car4	1.32800556897993e-07	1
ENSMUSG00000001435	Col18a1	0.00188237736939234	1
ENSMUSG00000002985	Apoe	4.91905510674865e-10	1
ENSMUSG00000003153	Slc2a3	4.25585978494334e-12	1
ENSMUSG00000003518	Dusp3	0.000851922868895579	1
ENSMUSG00000004936	Map2k1	0.0015708567219175	1
ENSMUSG00000005360	Slc1a3	7.13106122699547e-06	1
ENSMUSG00000005672	Kit	3.14398789399486e-05	1
ENSMUSG00000005892	Trh	3.45458755141977e-11	1
ENSMUSG00000006494	Pdk1	0.00401473922349219	1
ENSMUSG00000007872	Id3	3.09974717398024e-12	1
ENSMUSG00000012282	Wnt8a	0.00578804219673601	1
ENSMUSG00000016382	Pls3	0.00545740069261413	1
ENSMUSG00000019312	Grb7	0.000621538037355035	1
ENSMUSG00000020644	Id2	0.000307365073002504	1
ENSMUSG00000021678	F2rl1	4.14638940973691e-05	1
ENSMUSG00000021953	Tdh	2.90183591393421e-06	1
ENSMUSG00000022528	Hes1	1.57537656809336e-08	1
ENSMUSG00000023913	Pla2g7	0.000109151104657402	1
ENSMUSG00000024030	Abcg1	0.000480366008021726	1
ENSMUSG00000024521	Pmaip1	0.00021133249405988	1
ENSMUSG00000024617	Camk2a	1.77531275378668e-05	1
ENSMUSG00000025161	Slc16a3	0.000113377336101882	1
ENSMUSG00000025608	Podxl	0.00038427974321628	1
ENSMUSG00000025732	Mcrip2	0.000998972031134929	1
ENSMUSG00000025791	Pgm2	6.07010626017265e-08	1
ENSMUSG00000025856	Pdgfa	4.95086487921704e-09	1
ENSMUSG00000026896	Ifih1	0.000191890280571724	1
ENSMUSG00000027111	Itga6	1.33045444125354e-06	1
ENSMUSG00000027339	Rassf2	2.67774431834447e-05	1
ENSMUSG00000028278	Rragd	0.00438733420362506	1
ENSMUSG00000028583	Pdpn	0.00315212845010619	1
ENSMUSG00000028766	Alpl	9.43915424820203e-06	1
ENSMUSG00000028946	Hes3	7.53710784567393e-13	1
ENSMUSG00000029287	Tgfbr3	1.36930292919684e-05	1
ENSMUSG00000029838	Ptn	7.77798539071313e-07	1
ENSMUSG00000030222	Rerg	1.14739306975621e-06	1
ENSMUSG00000030428	Ttyh1	0.00221027407189978	1
ENSMUSG00000030774	Pak1	0.00689582056806335	1
ENSMUSG00000031155	Pim2	9.92985298186018e-13	1
ENSMUSG00000031160	Eras	6.2928934848875e-06	1
ENSMUSG00000031217	Efnb1	8.79557030177431e-05	1
ENSMUSG00000031297	Slc7a3	5.08837058460818e-09	1
ENSMUSG00000032011	Thy1	0.00507142454743789	1
ENSMUSG00000032946	Rasgrp2	1.02261313814227e-09	1
ENSMUSG00000038550	Ciart	1.37167983548011e-05	1
ENSMUSG00000039278	Pcsk1n	0.0015650944968429	1
ENSMUSG00000040669	Phc1	0.000628496498321734	1
ENSMUSG00000041703	Zic5	0.00160639627457135	1
ENSMUSG00000041992	Rapgef5	0.00109290420962378	1
ENSMUSG00000043192	Gm1840	0.00243877248728222	1
ENSMUSG00000043629	1700019D03Rik	0.000157519579306007	1
ENSMUSG00000044117	2900011O08Rik	0.00044777233924269	1
ENSMUSG00000045179	Sox3	2.79451617392311e-08	1
ENSMUSG00000045394	Epcam	4.53117533368848e-08	1
ENSMUSG00000045817	Zfp36l2	0.000107370179714307	1
ENSMUSG00000046718	Bst2	0.000108580353545852	1
ENSMUSG00000047632	Fgfbp3	1.66058845431417e-07	1
ENSMUSG00000047751	Utf1	2.39949125993332e-05	1
ENSMUSG00000048528	Nkx1-2	5.31697946074081e-12	1
ENSMUSG00000049422	Chchd10	0.000326390795589802	1
ENSMUSG00000049502	Dtx3l	0.00145590722517933	1
ENSMUSG00000049866	Arl4c	0.00179709016329896	1
ENSMUSG00000051375	Pcdh1	2.79236526378833e-06	1
ENSMUSG00000053367	Epp13	7.0887824134051e-05	1
ENSMUSG00000058070	Eml1	0.00816395753115501	1
ENSMUSG00000059334	Zfp36l3	0.00480174195511682	1
ENSMUSG00000062300	Nectin2	1.01724473399578e-08	1
ENSMUSG00000063531	Sema3e	5.70695090096917e-07	1
ENSMUSG00000070304	Scn2b	0.00393908322107959	1
ENSMUSG00000071856	Mcc	1.93111113897581e-06	1
ENSMUSG00000078566	Bnip3	5.27034892538947e-12	1
ENSMUSG00000079042	Apela	2.74720003874638e-05	1
ENSMUSG00000079445	B3gnt7	6.21469215781016e-08	1
ENSMUSG00000082389	Mkrn1-ps1	0.00208085013702219	1
ENSMUSG00000108900	C430049E01Rik	4.94798439581262e-05	1
ENSMUSG00000112850	Gm9176	7.63807965263885e-06	1
ENSMUSG00000001493	Meox1	5.57674072614505e-08	2
ENSMUSG00000002900	Lamb1	0.00228520481158407	2
ENSMUSG00000002944	Cd36	5.65427501744043e-05	2
ENSMUSG00000003436	Dll3	2.49957352823495e-10	2
ENSMUSG00000004187	Kifc2	4.11692495530556e-05	2
ENSMUSG00000005148	Klf5	1.37498295203491e-06	2
ENSMUSG00000006205	Htra1	1.47509492831744e-10	2
ENSMUSG00000013584	Aldh1a2	1.01253889473449e-12	2
ENSMUSG00000013698	Pea15a	4.81921780371753e-07	2
ENSMUSG00000014773	Dll1	1.43177922277229e-11	2
ENSMUSG00000016918	Sulf1	0.0030616800522379	2
ENSMUSG00000018398	Sept8	6.25356647851959e-06	2
ENSMUSG00000019880	Rspo3	6.44268575665467e-12	2
ENSMUSG00000019978	Epb41l2	5.01372537190945e-07	2
ENSMUSG00000019987	Arg1	1.7565497625568e-09	2
ENSMUSG00000020105	Lrig3	9.45128386710244e-07	2
ENSMUSG00000020388	Pdlim4	5.08311638978825e-11	2
ENSMUSG00000021136	Smoc1	0.00791801243909906	2
ENSMUSG00000022257	Laptm4b	5.01836132545603e-11	2
ENSMUSG00000022464	Slc38a4	0.000220007332345989	2
ENSMUSG00000022946	Dopey2	0.00146956671381655	2
ENSMUSG00000023781	Hes7	3.24607759629993e-05	2
ENSMUSG00000024901	Peli3	0.0003768206049096	2
ENSMUSG00000024907	Gal	3.06413445072357e-11	2
ENSMUSG00000025867	Cplx2	3.54473393606496e-06	2
ENSMUSG00000026193	Fn1	1.94012389751069e-10	2
ENSMUSG00000026447	Pik3c2b	1.55629214469834e-10	2
ENSMUSG00000026497	Mixl1	8.12533189580776e-06	2
ENSMUSG00000026640	Plxna2	1.1993076928805e-13	2
ENSMUSG00000026923	Notch1	4.92633222647147e-09	2
ENSMUSG00000027559	Car3	3.01586425986578e-09	2
ENSMUSG00000027712	Anxa5	3.26838590339975e-05	2
ENSMUSG00000028273	Pdlim5	2.09462781501574e-06	2
ENSMUSG00000028360	Slc44a5	7.91349354717695e-06	2
ENSMUSG00000029005	Draxin	0.00308211483615636	2
ENSMUSG00000029007	Agtrap	0.000921806004329222	2
ENSMUSG00000029090	Adgra3	9.25696292650337e-05	2
ENSMUSG00000029168	Dpysl5	0.00118228295247662	2
ENSMUSG00000029231	Pdgfra	2.14450407441309e-11	2
ENSMUSG00000029420	Rimbp2	2.30524918901306e-10	2
ENSMUSG00000029570	Lfng	0.00438074250895915	2
ENSMUSG00000030699	Tbx6	3.72644949359081e-12	2
ENSMUSG00000031073	Fgf15	6.78975305650237e-09	2
ENSMUSG00000031074	Fgf3	4.25963525705847e-07	2
ENSMUSG00000031093	Dock11	1.16765521843392e-06	2
ENSMUSG00000031383	Dusp9	0.00471995016879508	2
ENSMUSG00000031673	Cdh11	0.00522324437067464	2
ENSMUSG00000032291	Crabp1	8.13263588145578e-11	2
ENSMUSG00000032492	Pth1r	1.29297405241474e-09	2
ENSMUSG00000032698	Lmo2	3.11678062402222e-06	2
ENSMUSG00000032796	Lama1	0.000235161113643996	2
ENSMUSG00000035357	Pdzrn3	0.00488105337092306	2
ENSMUSG00000036111	Lmo1	0.000138012929588736	2
ENSMUSG00000036943	Rab8b	9.00803532089725e-06	2
ENSMUSG00000037736	Limch1	4.53331985376496e-05	2
ENSMUSG00000038132	Rbm24	0.00323485917787996	2
ENSMUSG00000038267	Slc22a23	0.00944755544522826	2
ENSMUSG00000038668	Lpar1	0.00367243185211148	2
ENSMUSG00000040433	Zbtb38	0.00422238227002814	2
ENSMUSG00000041688	Amot	2.77754469853217e-06	2
ENSMUSG00000042106	Fam212a	6.85934884651869e-10	2
ENSMUSG00000044338	Aplnr	4.41518924466322e-12	2
ENSMUSG00000044548	Dact1	6.84486197215861e-08	2
ENSMUSG00000045087	S1pr5	3.7969328946304e-09	2
ENSMUSG00000045136	Tubb2b	0.00334925733163097	2
ENSMUSG00000046714	Foxc2	0.00114885815159263	2
ENSMUSG00000046808	Atp10d	1.85493033029101e-07	2
ENSMUSG00000046841	Ckap4	0.00035426649060685	2
ENSMUSG00000047002	Msgn1	3.4362450013583e-13	2
ENSMUSG00000047250	Ptgs1	0.00505994980666291	2
ENSMUSG00000048078	Tenm4	0.00045006317696422	2
ENSMUSG00000049577	Zfpm1	0.00236528227169667	2
ENSMUSG00000050295	Foxc1	8.41318779275008e-08	2
ENSMUSG00000050917	Fgf4	0.00373516894404977	2
ENSMUSG00000051159	Cited1	1.33392726968003e-12	2
ENSMUSG00000051323	Pcdh19	4.26142092410553e-12	2
ENSMUSG00000052698	Tln2	0.000107749626696092	2
ENSMUSG00000055110	A630012P03Rik	0.00353899883244054	2
ENSMUSG00000055799	Tcf7l1	1.64168104273139e-05	2
ENSMUSG00000061751	Kalrn	0.000536552710544408	2
ENSMUSG00000062591	Tubb4a	9.77121165386228e-05	2
ENSMUSG00000068631	Gm7676	0.00185751831765289	2
ENSMUSG00000070327	Rnf213	8.41810296283153e-09	2
ENSMUSG00000071042	Rasgrp3	1.43953070037582e-08	2
ENSMUSG00000074444	Defa30	0.000410174645358628	2
ENSMUSG00000084844	Hoxb3os	1.30177858459925e-08	2
ENSMUSG00000104445	Rhbg	3.91880794139695e-09	2

## Sheet: E9.5-2clusters
GeneID	Gene name	Padj	Cluster
ENSMUSG00000047002	Msgn1	1.42e-09	1
ENSMUSG00000067586	S1pr3	1.12e-08	1
ENSMUSG00000051323	Pcdh19	2.1e-06	1
ENSMUSG00000026640	Plxna2	6.95e-06	1
ENSMUSG00000050295	Foxc1	9.79e-06	1
ENSMUSG00000005917	Otx1	1.98e-05	1
ENSMUSG00000053469	Tg	2.57e-05	1
ENSMUSG00000031074	Fgf3	7.86e-05	1
ENSMUSG00000030699	Tbx6	0.000158089	1
ENSMUSG00000014773	Dll1	0.000312279	1
ENSMUSG00000034936	Arl4d	0.000579624	1
ENSMUSG00000032796	Lama1	0.000985246	1
ENSMUSG00000024868	Dkk1	0.00153316	1
ENSMUSG00000096001	2610528A11Rik	0.00345494	1
ENSMUSG00000011256	Adam19	0.00379631	1
ENSMUSG00000027200	Sema6d	0.00457925	1
ENSMUSG00000035245	Eogt	0.00461966	1
ENSMUSG00000051367	Six1	0.00492658	1
ENSMUSG00000003436	Dll3	0.00623598	1
ENSMUSG00000071042	Rasgrp3	0.00791094	1
ENSMUSG00000022665	Ccdc80	0.0102175	1
ENSMUSG00000058297	Spock2	0.0114589	1
ENSMUSG00000042821	Snai1	0.0172242	1
ENSMUSG00000022799	Arhgap31	0.0175615	1
ENSMUSG00000019789	Hey2	0.0222428	1
ENSMUSG00000031073	Fgf15	0.032689	1
ENSMUSG00000007653	Gabrb2	0.0403038	1

## Sheet: EHF_epi+E9.5_epi-2clusters
GeneID	Gene name	Padj	Cluster
ENSMUSG00000022129	Dct	4.83838e-16	1
ENSMUSG00000061561	Olfr373	4.83838e-16	1
ENSMUSG00000079593	Gm14597	4.83838e-16	1
ENSMUSG00000079941	Gm11273	4.83838e-16	1
ENSMUSG00000083533	Gm13450	4.83838e-16	1
ENSMUSG00000091955	Gm9844	4.83838e-16	1
ENSMUSG00000097554	Gm26825	4.83838e-16	1
ENSMUSG00000024406	Pou5f1	7.89831e-16	1
ENSMUSG00000084883	Ccdc85c	1.25318e-15	1
ENSMUSG00000043633	Fam221b	2.17831e-15	1
ENSMUSG00000053173	Rpl18-ps2	2.17831e-15	1
ENSMUSG00000082617	Smt3h2-ps	4.28121e-15	1
ENSMUSG00000082500	Gm15195	4.64975e-15	1
ENSMUSG00000000303	Cdh1	7.13375e-15	1
ENSMUSG00000012396	Nanog	2.39973e-14	1
ENSMUSG00000049422	Chchd10	4.03552e-14	1
ENSMUSG00000021765	Fst	4.14437e-14	1
ENSMUSG00000000805	Car4	8.05851e-14	1
ENSMUSG00000032607	Amt	8.58548e-14	1
ENSMUSG00000083483	Gm14044	8.63466e-14	1
ENSMUSG00000064356	mt-Atp8	9.44315e-14	1
ENSMUSG00000021913	Ogdhl	1.31022e-13	1
ENSMUSG00000012282	Wnt8a	1.34431e-13	1
ENSMUSG00000062683	Atp5g2	1.7892e-13	1
ENSMUSG00000065947	mt-Nd4l	2.02803e-13	1
ENSMUSG00000034674	Tdg	2.19833e-13	1
ENSMUSG00000045394	Epcam	3.08948e-13	1
ENSMUSG00000087235	Gm4750	3.20627e-13	1
ENSMUSG00000037772	Mrpl23	3.29964e-13	1
ENSMUSG00000090733	Rps27	4.05553e-13	1
ENSMUSG00000002985	Apoe	4.6112e-13	1
ENSMUSG00000060860	Ube2s	4.75408e-13	1
ENSMUSG00000024619	Cdx1	5.29849e-13	1
ENSMUSG00000049091	Sephs2	5.58489e-13	1
ENSMUSG00000067860	Zic3	5.64967e-13	1
ENSMUSG00000064264	Zfp428	5.76431e-13	1
ENSMUSG00000058546	Rpl23a	5.82978e-13	1
ENSMUSG00000019874	Fabp7	6.25267e-13	1
ENSMUSG00000046865	Fbl	6.34743e-13	1
ENSMUSG00000093859	Gm7882	6.6211e-13	1
ENSMUSG00000063632	Sox11	6.76254e-13	1
ENSMUSG00000078974	Sec61g	6.76254e-13	1
ENSMUSG00000067288	Rps28	6.93849e-13	1
ENSMUSG00000080790	Gm7638	7.38623e-13	1
ENSMUSG00000034892	Rps29	7.44493e-13	1
ENSMUSG00000038717	Atp5l	7.86398e-13	1
ENSMUSG00000066116	Gm10154	8.06923e-13	1
ENSMUSG00000078377	Gm4294	9.33499e-13	1
ENSMUSG00000027637	1110008F13Rik	1.01105e-12	1
ENSMUSG00000095526	Gm10243	1.0327e-12	1
ENSMUSG00000062328	Rpl17	1.11877e-12	1
ENSMUSG00000097971	Gm26917	1.19212e-12	1
ENSMUSG00000044250	Pced1b	1.20086e-12	1
ENSMUSG00000028669	Pithd1	1.21469e-12	1
ENSMUSG00000079480	Pin4	1.28494e-12	1
ENSMUSG00000066443	Gm10163	1.36663e-12	1
ENSMUSG00000082054	Psmb6-ps	1.40106e-12	1
ENSMUSG00000093671	Gm20656	1.52698e-12	1
ENSMUSG00000004455	Ppp1cc	1.66299e-12	1
ENSMUSG00000095288	Gm7618	1.96314e-12	1
ENSMUSG00000031155	Pim2	2.57937e-12	1
ENSMUSG00000031953	Tmem170	4.11452e-12	1
ENSMUSG00000020211	Sf3a2	5.14321e-12	1
ENSMUSG00000032946	Rasgrp2	6.36214e-12	1
ENSMUSG00000025825	Iscu	6.53271e-12	1
ENSMUSG00000057551	Zfp317	6.6749e-12	1
ENSMUSG00000031609	Sap30	7.89466e-12	1
ENSMUSG00000028416	Bag1	8.77049e-12	1
ENSMUSG00000067199	Frat1	9.64812e-12	1
ENSMUSG00000074102	Rbm15b	9.64812e-12	1
ENSMUSG00000095687	Rnaset2a	1.05508e-11	1
ENSMUSG00000083166	Gm8648	1.3421e-11	1
ENSMUSG00000067629	Syngap1	1.87744e-11	1
ENSMUSG00000036835	Psenen	2.41073e-11	1
ENSMUSG00000025858	Get4	2.45397e-11	1
ENSMUSG00000081552	Gm12328	2.79628e-11	1
ENSMUSG00000098201	Gm26983	3.60616e-11	1
ENSMUSG00000084235	Gm15421	3.61654e-11	1
ENSMUSG00000094724	Rnaset2b	5.33703e-11	1
ENSMUSG00000064357	mt-Atp6	7.35959e-11	1
ENSMUSG00000016344	Ppdpf	7.49798e-11	1
ENSMUSG00000020407	Upp1	1.02444e-10	1
ENSMUSG00000086699	Gm16510	1.30753e-10	1
ENSMUSG00000005892	Trh	1.32464e-10	1
ENSMUSG00000071658	Gng3	1.36797e-10	1
ENSMUSG00000097961	Gm27000	1.3723e-10	1
ENSMUSG00000062300	Nectin2	1.49411e-10	1
ENSMUSG00000061024	Rrs1	1.6026e-10	1
ENSMUSG00000090544	Gm6576	1.63652e-10	1
ENSMUSG00000074034	Gm5921	2.09601e-10	1
ENSMUSG00000015994	Fnta	3.12322e-10	1
ENSMUSG00000019158	Tmem160	3.27147e-10	1
ENSMUSG00000024014	Pim1	3.63943e-10	1
ENSMUSG00000079042	Apela	4.44883e-10	1
ENSMUSG00000094974	Rps19-ps2	4.44883e-10	1
ENSMUSG00000095562	Gm21887	4.44883e-10	1
ENSMUSG00000096356	Olfr889	4.44883e-10	1
ENSMUSG00000029725	Ppp1r35	4.75847e-10	1
ENSMUSG00000038141	Tmem181a	5.35578e-10	1
ENSMUSG00000058050	Gm9234	5.60035e-10	1
ENSMUSG00000038007	Acer2	6.23472e-10	1
ENSMUSG00000067924	Rtl8b	6.88471e-10	1
ENSMUSG00000047370	Gm7367	7.31519e-10	1
ENSMUSG00000071235	Vrtn	9.68558e-10	1
ENSMUSG00000024726	Carnmt1	1.13459e-09	1
ENSMUSG00000020108	Ddit4	1.22746e-09	1
ENSMUSG00000064354	mt-Co2	1.59278e-09	1
ENSMUSG00000042286	Stab1	1.94692e-09	1
ENSMUSG00000073079	Srp54	2.06812e-09	1
ENSMUSG00000082079	Dnmt3c	2.21494e-09	1
ENSMUSG00000002981	Clptm1	2.33468e-09	1
ENSMUSG00000061474	Mrps36	2.35117e-09	1
ENSMUSG00000030222	Rerg	2.60483e-09	1
ENSMUSG00000071748	Gm14698	2.62839e-09	1
ENSMUSG00000043445	Pgp	2.96952e-09	1
ENSMUSG00000069622	Gm10273	4.30172e-09	1
ENSMUSG00000015134	Aldh1a3	4.53413e-09	1
ENSMUSG00000051721	Wdcp	4.96804e-09	1
ENSMUSG00000082510	Gm11793	5.02447e-09	1
ENSMUSG00000030059	Tmf1	6.14151e-09	1
ENSMUSG00000010760	Phlda2	7.6721e-09	1
ENSMUSG00000086127	Gm11934	1.23823e-08	1
ENSMUSG00000024617	Camk2a	1.38459e-08	1
ENSMUSG00000020902	Ntn1	1.51999e-08	1
ENSMUSG00000057244	Gm6139	1.84957e-08	1
ENSMUSG00000079445	B3gnt7	2.00451e-08	1
ENSMUSG00000072789	Gm10420	2.13468e-08	1
ENSMUSG00000094248	Hist1h2ao	2.17372e-08	1
ENSMUSG00000001134	Uxt	2.29469e-08	1
ENSMUSG00000096255	Dynlt1	2.47653e-08	1
ENSMUSG00000032387	Rbpms2	2.72094e-08	1
ENSMUSG00000060032	H2afj	3.60092e-08	1
ENSMUSG00000063047	Zfp780b	3.70104e-08	1
ENSMUSG00000046718	Bst2	4.34826e-08	1
ENSMUSG00000002661	Alkbh7	4.74281e-08	1
ENSMUSG00000041716	Gm20604	5.19547e-08	1
ENSMUSG00000080205	Gm15526	5.52614e-08	1
ENSMUSG00000084111	Gm15710	5.78229e-08	1
ENSMUSG00000082192	Gm14719	6.50179e-08	1
ENSMUSG00000014301	Pam16	6.58361e-08	1
ENSMUSG00000033837	Foxh1	7.05546e-08	1
ENSMUSG00000071303	Rps8-ps1	7.13786e-08	1
ENSMUSG00000084843	B230312C02Rik	7.18961e-08	1
ENSMUSG00000089785	Slc25a5-ps	7.32228e-08	1
ENSMUSG00000042751	Nmnat2	9.02989e-08	1
ENSMUSG00000022436	Sh3bp1	9.5644e-08	1
ENSMUSG00000030431	Tmem238	1.08596e-07	1
ENSMUSG00000018040	Rrp7a	1.09027e-07	1
ENSMUSG00000070304	Scn2b	1.15343e-07	1
ENSMUSG00000036430	Tbcc	1.19011e-07	1
ENSMUSG00000005148	Klf5	1.57399e-07	1
ENSMUSG00000031160	Eras	1.60925e-07	1
ENSMUSG00000043162	Pyurf	1.60925e-07	1
ENSMUSG00000047751	Utf1	1.60925e-07	1
ENSMUSG00000004187	Kifc2	1.67266e-07	1
ENSMUSG00000052253	Zfp622	2.00943e-07	1
ENSMUSG00000041801	Phlda3	2.03779e-07	1
ENSMUSG00000011382	Dhdh	2.09342e-07	1
ENSMUSG00000037010	Apln	2.19089e-07	1
ENSMUSG00000083434	Gm12760	2.4994e-07	1
ENSMUSG00000027210	Meis2	2.7826e-07	1
ENSMUSG00000089988	Gm16238	3.10931e-07	1
ENSMUSG00000081210	Gm12933	3.25598e-07	1
ENSMUSG00000044117	2900011O08Rik	4.1728e-07	1
ENSMUSG00000024558	Mapk4	4.18749e-07	1
ENSMUSG00000082793	Gm9308	4.36088e-07	1
ENSMUSG00000081120	Gm12458	4.43006e-07	1
ENSMUSG00000079108	Srp54b	4.71035e-07	1
ENSMUSG00000023307	March5	4.92689e-07	1
ENSMUSG00000033751	Gadd45gip1	4.92689e-07	1
ENSMUSG00000028470	Hint2	5.27792e-07	1
ENSMUSG00000064336	mt-Tf	5.27857e-07	1
ENSMUSG00000043629	1700019D03Rik	5.45708e-07	1
ENSMUSG00000047632	Fgfbp3	5.67245e-07	1
ENSMUSG00000082662	Gm15516	6.63733e-07	1
ENSMUSG00000098332	2310009A05Rik	7.43019e-07	1
ENSMUSG00000034789	Rab24	8.30675e-07	1
ENSMUSG00000020782	Llgl2	8.5968e-07	1
ENSMUSG00000021953	Tdh	8.79544e-07	1
ENSMUSG00000058542	Gm15590	9.10541e-07	1
ENSMUSG00000083012	Fam220a	9.76289e-07	1
ENSMUSG00000034173	Zbed5	9.76656e-07	1
ENSMUSG00000083551	Gm14516	1.00695e-06	1
ENSMUSG00000051043	Gprc5c	1.01434e-06	1
ENSMUSG00000053395	Cacng8	1.1157e-06	1
ENSMUSG00000089967	Gm16550	1.2494e-06	1
ENSMUSG00000048758	Rpl29	1.35619e-06	1
ENSMUSG00000034336	Ina	1.41077e-06	1
ENSMUSG00000053367	Epp13	1.4428e-06	1
ENSMUSG00000060198	Gm11353	1.44815e-06	1
ENSMUSG00000011096	Akt1s1	1.48798e-06	1
ENSMUSG00000039568	Ubald1	1.55092e-06	1
ENSMUSG00000060708	Bloc1s4	1.62729e-06	1
ENSMUSG00000068263	Efcc1	1.64915e-06	1
ENSMUSG00000067321	Gm7931	1.7207e-06	1
ENSMUSG00000002550	Uck1	1.85334e-06	1
ENSMUSG00000059422	Gm8116	1.87212e-06	1
ENSMUSG00000023902	Zscan10	1.95948e-06	1
ENSMUSG00000054702	Ap1s3	1.98699e-06	1
ENSMUSG00000039278	Pcsk1n	2.16103e-06	1
ENSMUSG00000054626	Xlr	2.44257e-06	1
ENSMUSG00000024790	Sac3d1	2.62223e-06	1
ENSMUSG00000082061	Gm12726	2.87289e-06	1
ENSMUSG00000029776	Hibadh	2.90998e-06	1
ENSMUSG00000080932	Gm10224	3.31231e-06	1
ENSMUSG00000053205	Styx	3.36187e-06	1
ENSMUSG00000032239	Rp9	3.81852e-06	1
ENSMUSG00000029030	Tprgl	4.05373e-06	1
ENSMUSG00000026896	Ifih1	4.17827e-06	1
ENSMUSG00000087166	L1td1	4.17827e-06	1
ENSMUSG00000083823	Amd-ps1	4.32576e-06	1
ENSMUSG00000029287	Tgfbr3	4.64092e-06	1
ENSMUSG00000047843	Bri3	6.48613e-06	1
ENSMUSG00000073197	5730507C01Rik	6.52375e-06	1
ENSMUSG00000086743	Hnrnpa1l2-ps	6.9689e-06	1
ENSMUSG00000080859	Rpl10-ps1	7.47378e-06	1
ENSMUSG00000028563	Tm2d1	7.64706e-06	1
ENSMUSG00000024761	Gm16437	8.24398e-06	1
ENSMUSG00000081926	Gm15536	8.39465e-06	1
ENSMUSG00000082826	Mif-ps3	8.6165e-06	1
ENSMUSG00000054196	Cthrc1	8.68673e-06	1
ENSMUSG00000038880	Mrps34	8.93933e-06	1
ENSMUSG00000031916	Cog8	8.96861e-06	1
ENSMUSG00000046691	Chtf8	1.03516e-05	1
ENSMUSG00000031297	Slc7a3	1.09638e-05	1
ENSMUSG00000070509	Rgma	1.18878e-05	1
ENSMUSG00000097399	Gm26555	1.30736e-05	1
ENSMUSG00000067925	Rtl8a	1.40516e-05	1
ENSMUSG00000019297	Nop9	1.41804e-05	1
ENSMUSG00000079942	Rpl28-ps3	1.48359e-05	1
ENSMUSG00000008140	Emc10	1.65937e-05	1
ENSMUSG00000049580	Tsku	1.76391e-05	1
ENSMUSG00000052488	Cherp	1.79082e-05	1
ENSMUSG00000033147	Slc22a15	1.79679e-05	1
ENSMUSG00000021678	F2rl1	1.83091e-05	1
ENSMUSG00000046229	Scand1	2.19842e-05	1
ENSMUSG00000067736	Gm10222	2.511e-05	1
ENSMUSG00000037169	Mycn	2.5743e-05	1
ENSMUSG00000027559	Car3	2.79387e-05	1
ENSMUSG00000039725	Trp53rka	2.85196e-05	1
ENSMUSG00000057789	Bak1	3.0657e-05	1
ENSMUSG00000020484	Xbp1	3.33615e-05	1
ENSMUSG00000081568	Gm15032	3.37862e-05	1
ENSMUSG00000097709	2810429I04Rik	3.69913e-05	1
ENSMUSG00000060152	Pop5	3.8773e-05	1
ENSMUSG00000049420	Tmem200a	3.93493e-05	1
ENSMUSG00000070520	Nsmce3	3.94871e-05	1
ENSMUSG00000039253	Fn3krp	4.38284e-05	1
ENSMUSG00000056895	Hist3h2ba	4.62541e-05	1
ENSMUSG00000062365	Gm4968	4.99011e-05	1
ENSMUSG00000079224	Gm6565	5.14586e-05	1
ENSMUSG00000040749	Siah1b	5.2917e-05	1
ENSMUSG00000015843	Rxrg	5.58747e-05	1
ENSMUSG00000033701	Acbd6	5.62802e-05	1
ENSMUSG00000084373	Rps2-ps4	5.82723e-05	1
ENSMUSG00000028030	Tbck	6.21851e-05	1
ENSMUSG00000082874	Rpl15-ps1	8.2049e-05	1
ENSMUSG00000083852	Gm13007	8.43184e-05	1
ENSMUSG00000027175	Tcp11l1	8.67248e-05	1
ENSMUSG00000003309	Ap1m2	8.95768e-05	1
ENSMUSG00000067529	Olfr1423	8.95768e-05	1
ENSMUSG00000096916	Zfp850	8.95768e-05	1
ENSMUSG00000036561	Ppp6r2	0.00010567	1
ENSMUSG00000034974	Dapk3	0.000105947	1
ENSMUSG00000030584	Dpf1	0.000107597	1
ENSMUSG00000054452	Aes	0.000109156	1
ENSMUSG00000028417	Tal2	0.000111782	1
ENSMUSG00000062908	Acadm	0.000111998	1
ENSMUSG00000094777	Hist1h2ap	0.00012548	1
ENSMUSG00000043311	D17H6S53E	0.000126276	1
ENSMUSG00000032224	Fam81a	0.000129663	1
ENSMUSG00000034486	Gbx2	0.000133279	1
ENSMUSG00000002274	Metrn	0.000141394	1
ENSMUSG00000092680	Snord55	0.000141702	1
ENSMUSG00000034275	Igsf9b	0.000142523	1
ENSMUSG00000083713	Gm5883	0.000144298	1
ENSMUSG00000022186	Oxct1	0.000172018	1
ENSMUSG00000021814	Anxa7	0.000174458	1
ENSMUSG00000040728	Esrp1	0.000177193	1
ENSMUSG00000029838	Ptn	0.000180544	1
ENSMUSG00000004069	Dnaja3	0.000219141	1
ENSMUSG00000004951	Hspb1	0.000238824	1
ENSMUSG00000087286	Gm9013	0.00023886	1
ENSMUSG00000072694	1500011B03Rik	0.00028293	1
ENSMUSG00000079508	Apoo	0.000301517	1
ENSMUSG00000022040	Ephx2	0.000307698	1
ENSMUSG00000082127	Gm13577	0.00032118	1
ENSMUSG00000006219	Fblim1	0.000327523	1
ENSMUSG00000085893	Gm12091	0.00032951	1
ENSMUSG00000048355	Arxes1	0.000367469	1
ENSMUSG00000085795	Zfp703	0.00043497	1
ENSMUSG00000027324	Rpusd2	0.000439411	1
ENSMUSG00000022131	Gpr180	0.0005031	1
ENSMUSG00000045658	Pid1	0.000505311	1
ENSMUSG00000090467	Gm4613	0.000519398	1
ENSMUSG00000054499	Dedd2	0.000609088	1
ENSMUSG00000085748	Gm12280	0.000612626	1
ENSMUSG00000036647	Olfr6	0.000623477	1
ENSMUSG00000059031	Olfr482	0.000623477	1
ENSMUSG00000069925	4932416K20Rik	0.000623477	1
ENSMUSG00000083481	Rps8-ps2	0.000623477	1
ENSMUSG00000096740	Lbhd1	0.000623477	1
ENSMUSG00000003518	Dusp3	0.000640133	1
ENSMUSG00000039914	Coq10a	0.000649873	1
ENSMUSG00000041992	Rapgef5	0.000673589	1
ENSMUSG00000072421	Gm10357	0.000678569	1
ENSMUSG00000063586	Gm5513	0.000685903	1
ENSMUSG00000084345	Rpl17-ps4	0.00076382	1
ENSMUSG00000069083	Gm10259	0.000806916	1
ENSMUSG00000032051	Fdx1	0.0008081	1
ENSMUSG00000025791	Pgm2	0.000834602	1
ENSMUSG00000082792	Gm12176	0.000845619	1
ENSMUSG00000031217	Efnb1	0.000855909	1
ENSMUSG00000028911	Srsf4	0.000861485	1
ENSMUSG00000054716	Zfp771	0.000866674	1
ENSMUSG00000020308	Tpgs1	0.000886717	1
ENSMUSG00000050732	Vamp8	0.000987827	1
ENSMUSG00000036138	Acaa1a	0.00103473	1
ENSMUSG00000083382	Gm6433	0.00103576	1
ENSMUSG00000083101	Gm13430	0.00109939	1
ENSMUSG00000042167	Papd4	0.00113231	1
ENSMUSG00000010517	Faf1	0.00115443	1
ENSMUSG00000003269	Cyth2	0.00115546	1
ENSMUSG00000012429	Mplkip	0.00122793	1
ENSMUSG00000082195	Gm13034	0.00125235	1
ENSMUSG00000066026	Dhrs3	0.00137534	1
ENSMUSG00000083878	Gm12034	0.00143659	1
ENSMUSG00000084224	Gm12337	0.001462	1
ENSMUSG00000002968	Med25	0.00149378	1
ENSMUSG00000031383	Dusp9	0.00152593	1
ENSMUSG00000047036	Zfp445	0.00154489	1
ENSMUSG00000040564	Apoc1	0.00159536	1
ENSMUSG00000084163	Gm11901	0.00159536	1
ENSMUSG00000084308	Gm14593	0.00159536	1
ENSMUSG00000092627	D130058E05Rik	0.00159536	1
ENSMUSG00000094103	1700047I17Rik2	0.00159536	1
ENSMUSG00000060519	Tor3a	0.00169204	1
ENSMUSG00000050323	Ndufaf6	0.00172802	1
ENSMUSG00000030041	M1ap	0.00179153	1
ENSMUSG00000051671	Coa6	0.00180873	1
ENSMUSG00000024913	Lrp5	0.00182049	1
ENSMUSG00000020020	Usp44	0.00184942	1
ENSMUSG00000032011	Thy1	0.00193864	1
ENSMUSG00000081740	Gm14279	0.00199961	1
ENSMUSG00000005469	Prkaca	0.00210631	1
ENSMUSG00000061897	Gm14292	0.00231834	1
ENSMUSG00000054727	1700013H16Rik	0.00232479	1
ENSMUSG00000041736	Tspo	0.00239192	1
ENSMUSG00000024697	Gna14	0.0024346	1
ENSMUSG00000049090	Zadh2	0.00254868	1
ENSMUSG00000090101	Snhg9	0.00257493	1
ENSMUSG00000052934	Fbxo31	0.00269605	1
ENSMUSG00000075227	Znhit2	0.00287657	1
ENSMUSG00000078570	1110065P20Rik	0.00297684	1
ENSMUSG00000050628	Ubald2	0.00300719	1
ENSMUSG00000030428	Ttyh1	0.00310214	1
ENSMUSG00000073468	Sft2d1	0.00319761	1
ENSMUSG00000059981	Taok2	0.00323891	1
ENSMUSG00000063275	Hacd1	0.0032463	1
ENSMUSG00000020469	Myl7	0.00347693	1
ENSMUSG00000018865	Sult4a1	0.00349242	1
ENSMUSG00000059064	Gm10059	0.00351222	1
ENSMUSG00000063245	Zfp993	0.00372643	1
ENSMUSG00000019909	Fam162b	0.00400445	1
ENSMUSG00000041907	Gpr45	0.00400445	1
ENSMUSG00000051527	Usp29	0.00400445	1
ENSMUSG00000060429	Sntb1	0.00400445	1
ENSMUSG00000062077	Trim54	0.00400445	1
ENSMUSG00000087569	Gm8464	0.00400445	1
ENSMUSG00000092349	Platr17	0.00400445	1
ENSMUSG00000026223	Itm2c	0.0041687	1
ENSMUSG00000015337	Endog	0.00417672	1
ENSMUSG00000047155	Cyp4x1	0.00422231	1
ENSMUSG00000098138	Gm9081	0.0042448	1
ENSMUSG00000098713	Rps2-ps5	0.0043246	1
ENSMUSG00000028946	Hes3	0.00472328	1
ENSMUSG00000033318	Gstt2	0.00491118	1
ENSMUSG00000003680	Taf6l	0.0049289	1
ENSMUSG00000068243	Gm7079	0.00495854	1
ENSMUSG00000041353	Tmem29	0.00510051	1
ENSMUSG00000001300	Efnb2	0.00538056	1
ENSMUSG00000035199	Arl6ip5	0.00577462	1
ENSMUSG00000024873	Cnih2	0.00586108	1
ENSMUSG00000059334	Zfp36l3	0.00586108	1
ENSMUSG00000056812	St8sia3	0.00608977	1
ENSMUSG00000094649	Gm7102	0.00637132	1
ENSMUSG00000070366	Plpp4	0.00653526	1
ENSMUSG00000025357	Dgka	0.00663927	1
ENSMUSG00000009292	Trpm2	0.00664655	1
ENSMUSG00000069755	Zfp125	0.0066598	1
ENSMUSG00000053411	Cbx7	0.0067867	1
ENSMUSG00000081895	Rpl17-ps10	0.00699927	1
ENSMUSG00000006058	Snf8	0.00732119	1
ENSMUSG00000075588	Hoxb2	0.00744397	1
ENSMUSG00000038612	Mcl1	0.00780558	1
ENSMUSG00000026999	Nup35	0.00795361	1
ENSMUSG00000025422	Agap2	0.0088298	1
ENSMUSG00000022863	Btg3	0.00887188	1
ENSMUSG00000032495	Lrrc2	0.0090932	1
ENSMUSG00000022663	Atg3	0.00921155	1
ENSMUSG00000002341	Ncan	0.00960694	1
ENSMUSG00000030604	Zfp626	0.0096945	1
ENSMUSG00000066107	Gm12666	0.00986022	1
ENSMUSG00000080730	Gm11313	0.00986022	1
ENSMUSG00000080969	Gm12372	0.00986022	1
ENSMUSG00000066637	Ttc32	0.00996486	1
ENSMUSG00000000938	Hoxa10	2.81112e-14	2
ENSMUSG00000001657	Hoxc8	2.81112e-14	2
ENSMUSG00000022484	Hoxc10	2.81112e-14	2
ENSMUSG00000036139	Hoxc9	2.81112e-14	2
ENSMUSG00000038236	Hoxa7	2.81112e-14	2
ENSMUSG00000043342	Hoxd9	2.81112e-14	2
ENSMUSG00000057886	Cbx3-ps6	2.81112e-14	2
ENSMUSG00000061330	Gm6436	2.81112e-14	2
ENSMUSG00000076999	Gm22426	2.81112e-14	2
ENSMUSG00000079501	Gm5138	2.81112e-14	2
ENSMUSG00000081306	Gm15266	2.81112e-14	2
ENSMUSG00000083669	Gm10169	2.81112e-14	2
ENSMUSG00000094708	Gm10359	2.81112e-14	2
ENSMUSG00000095937	Gm12671	2.81112e-14	2
ENSMUSG00000098178	Gm42418	2.81112e-14	2
ENSMUSG00000038227	Hoxa9	3.61305e-14	2
ENSMUSG00000078965	Gm12033	3.61305e-14	2
ENSMUSG00000052293	Taf9	4.57925e-14	2
ENSMUSG00000084838	Gm10241	4.57925e-14	2
ENSMUSG00000037736	Limch1	5.24875e-14	2
ENSMUSG00000081352	Gm12389	5.72211e-14	2
ENSMUSG00000081731	Calr-ps	5.72211e-14	2
ENSMUSG00000023036	Pcdhgc4	5.83481e-14	2
ENSMUSG00000028883	Sema3a	6.43741e-14	2
ENSMUSG00000082043	Gm12848	8.58548e-14	2
ENSMUSG00000095042	Gm12537	8.63466e-14	2
ENSMUSG00000010205	Raver1	9.14407e-14	2
ENSMUSG00000026185	Igfbp5	9.14407e-14	2
ENSMUSG00000027102	Hoxd8	9.14407e-14	2
ENSMUSG00000078636	Gm7336	9.14407e-14	2
ENSMUSG00000079277	Hoxd3	9.14407e-14	2
ENSMUSG00000081106	Gm7155	9.14407e-14	2
ENSMUSG00000090138	Gm3687	9.14407e-14	2
ENSMUSG00000097006	9530082P21Rik	1.46576e-13	2
ENSMUSG00000078967	Gm3272	1.61362e-13	2
ENSMUSG00000084022	Gm16459	1.61362e-13	2
ENSMUSG00000048583	Igf2	1.64448e-13	2
ENSMUSG00000062687	Cks1brt	1.64448e-13	2
ENSMUSG00000081559	Gm12411	1.67517e-13	2
ENSMUSG00000082585	Gm15387	1.67517e-13	2
ENSMUSG00000028327	Stra6l	1.89438e-13	2
ENSMUSG00000092344	Hspe1-ps3	1.92851e-13	2
ENSMUSG00000085645	Hoxb5os	2.00584e-13	2
ENSMUSG00000059647	Cbx3-ps7	2.0941e-13	2
ENSMUSG00000083998	Prdx2-rs3	2.0941e-13	2
ENSMUSG00000021871	Pnp	2.10991e-13	2
ENSMUSG00000081176	H3f3a-ps2	2.68136e-13	2
ENSMUSG00000001661	Hoxc6	2.90824e-13	2
ENSMUSG00000044639	Gm11507	2.90824e-13	2
ENSMUSG00000072594	Gm16439	2.90824e-13	2
ENSMUSG00000078706	Gm53	2.90824e-13	2
ENSMUSG00000082687	Gm11474	2.90824e-13	2
ENSMUSG00000083462	Gm12501	2.90824e-13	2
ENSMUSG00000096810	Gm10481	2.92262e-13	2
ENSMUSG00000083832	Gm13771	3.02056e-13	2
ENSMUSG00000080928	Hmgb1-ps6	3.06557e-13	2
ENSMUSG00000079962	Gm12643	3.73242e-13	2
ENSMUSG00000098111	Gm4654	3.88084e-13	2
ENSMUSG00000091442	Gm17031	4.04533e-13	2
ENSMUSG00000081677	Mdk-ps1	4.1389e-13	2
ENSMUSG00000084325	Gm15550	4.3247e-13	2
ENSMUSG00000066068	Gm13611	4.37698e-13	2
ENSMUSG00000076137	Gm26384	4.50812e-13	2
ENSMUSG00000090737	Gm6788	4.6112e-13	2
ENSMUSG00000020875	Hoxb9	4.88378e-13	2
ENSMUSG00000062611	Rps3a2	5.00283e-13	2
ENSMUSG00000082420	Gm6517	5.00283e-13	2
ENSMUSG00000082423	Gm15148	5.00283e-13	2
ENSMUSG00000083019	Gm6222	5.00283e-13	2
ENSMUSG00000080747	Gm14016	5.19974e-13	2
ENSMUSG00000084874	Gm12906	5.19974e-13	2
ENSMUSG00000089735	Gm8428	5.19974e-13	2
ENSMUSG00000091942	Gm17138	5.19974e-13	2
ENSMUSG00000025922	Gm5045	5.23822e-13	2
ENSMUSG00000097895	Gm18709	5.53145e-13	2
ENSMUSG00000083159	Gm12180	6.11131e-13	2
ENSMUSG00000081221	Gm14760	6.33012e-13	2
ENSMUSG00000081076	Rpsa-ps4	6.75802e-13	2
ENSMUSG00000063543	Gm5616	6.76234e-13	2
ENSMUSG00000064340	mt-Tl1	6.76254e-13	2
ENSMUSG00000094989	Rpl9-ps4	6.76254e-13	2
ENSMUSG00000062083	Rpl13a-ps1	6.93849e-13	2
ENSMUSG00000080806	Gm13005	6.93849e-13	2
ENSMUSG00000096842	Gm10736	6.93849e-13	2
ENSMUSG00000081289	Gm14857	7.07923e-13	2
ENSMUSG00000083362	Gm8606	7.13173e-13	2
ENSMUSG00000071653	1810009A15Rik	7.19927e-13	2
ENSMUSG00000098113	Gm2445	7.19927e-13	2
ENSMUSG00000036523	Greb1	7.22965e-13	2
ENSMUSG00000083773	Gm13394	7.34798e-13	2
ENSMUSG00000058567	Gm2531	7.4411e-13	2
ENSMUSG00000081578	Gm12611	7.4411e-13	2
ENSMUSG00000096438	Gapdh-ps15	7.4411e-13	2
ENSMUSG00000028496	Mllt3	7.53633e-13	2
ENSMUSG00000083831	Gm14248	7.61383e-13	2
ENSMUSG00000082491	Gm5909	7.82288e-13	2
ENSMUSG00000081093	Gm12565	7.92139e-13	2
ENSMUSG00000068200	Gm5931	8.19679e-13	2
ENSMUSG00000082241	Gng5-ps	8.33047e-13	2
ENSMUSG00000051396	Gm45902	8.38555e-13	2
ENSMUSG00000083655	Gm12099	8.48079e-13	2
ENSMUSG00000081258	Gm14013	9.00108e-13	2
ENSMUSG00000084274	Gm12504	9.44967e-13	2
ENSMUSG00000081673	Gm14794	9.87291e-13	2
ENSMUSG00000083280	Gm11838	9.87291e-13	2
ENSMUSG00000092540	Gm8738	1.14088e-12	2
ENSMUSG00000096173	Gm3150	1.14124e-12	2
ENSMUSG00000066687	Zbtb16	1.21798e-12	2
ENSMUSG00000078592	Gm4609	1.21812e-12	2
ENSMUSG00000070271	Gm13268	1.22167e-12	2
ENSMUSG00000022101	Fgf17	1.2334e-12	2
ENSMUSG00000063129	Aldoart2	1.25374e-12	2
ENSMUSG00000081389	Gm13368	1.25374e-12	2
ENSMUSG00000092230	Gm18889	1.26837e-12	2
ENSMUSG00000097207	6030443J06Rik	1.28091e-12	2
ENSMUSG00000083399	Gm15033	1.2915e-12	2
ENSMUSG00000094886	Gm10784	1.2915e-12	2
ENSMUSG00000021614	Vcan	1.29263e-12	2
ENSMUSG00000081664	Gm15544	1.38797e-12	2
ENSMUSG00000083737	Prdx6-ps2	1.38797e-12	2
ENSMUSG00000055795	Gm5160	1.39526e-12	2
ENSMUSG00000043295	Gm16373	1.45289e-12	2
ENSMUSG00000092240	Gm4246	1.46988e-12	2
ENSMUSG00000084249	Gm12267	1.6615e-12	2
ENSMUSG00000043496	Tril	1.66822e-12	2
ENSMUSG00000074506	Gm10705	1.66822e-12	2
ENSMUSG00000081257	Gm13607	1.66822e-12	2
ENSMUSG00000082280	Gm5847	1.66822e-12	2
ENSMUSG00000069913	Anp32-ps	1.67017e-12	2
ENSMUSG00000082218	Gm13602	1.67017e-12	2
ENSMUSG00000092510	Gm18343	1.67232e-12	2
ENSMUSG00000081584	Gm12716	1.71938e-12	2
ENSMUSG00000060777	Gm10087	1.75667e-12	2
ENSMUSG00000081816	Gm15528	1.77887e-12	2
ENSMUSG00000083449	Gm13487	1.96695e-12	2
ENSMUSG00000081231	Tcp1-ps1	2.12817e-12	2
ENSMUSG00000082669	Gm5393	2.12817e-12	2
ENSMUSG00000084081	Gm12057	2.12817e-12	2
ENSMUSG00000082029	H3f3c	2.15684e-12	2
ENSMUSG00000084018	Gm11895	2.15684e-12	2
ENSMUSG00000091831	Gm4707	2.29961e-12	2
ENSMUSG00000050114	Prdx6b	2.68416e-12	2
ENSMUSG00000097790	Gm16399	2.70718e-12	2
ENSMUSG00000022362	Gm29394	2.72991e-12	2
ENSMUSG00000022367	Has2	2.72991e-12	2
ENSMUSG00000082552	Gm11850	2.72991e-12	2
ENSMUSG00000082160	Gm11578	2.74865e-12	2
ENSMUSG00000082810	Gm8682	2.74865e-12	2
ENSMUSG00000083378	Gm13196	3.04828e-12	2
ENSMUSG00000031326	Cdx4	3.30941e-12	2
ENSMUSG00000080979	Gm13675	3.30941e-12	2
ENSMUSG00000068631	Gm7676	3.34644e-12	2
ENSMUSG00000083793	Gm14274	3.34644e-12	2
ENSMUSG00000089748	Matr3-ps2	3.34644e-12	2
ENSMUSG00000081232	Gm14373	3.45543e-12	2
ENSMUSG00000082738	Gm15422	3.78192e-12	2
ENSMUSG00000019880	Rspo3	4.03744e-12	2
ENSMUSG00000082571	Gm8737	4.0934e-12	2
ENSMUSG00000074997	Pin1rt1	4.12851e-12	2
ENSMUSG00000047786	Lix1	4.24474e-12	2
ENSMUSG00000083890	Gm15703	4.28247e-12	2
ENSMUSG00000083813	Gm15502	4.32204e-12	2
ENSMUSG00000022842	Ece2	4.3675e-12	2
ENSMUSG00000029309	Sparcl1	4.3675e-12	2
ENSMUSG00000078302	Foxd1	4.66151e-12	2
ENSMUSG00000081643	Gm11605	4.76245e-12	2
ENSMUSG00000080844	Gm14107	4.80178e-12	2
ENSMUSG00000083544	Oat-rs1	4.80396e-12	2
ENSMUSG00000082120	Gm15720	4.82278e-12	2
ENSMUSG00000081661	Gm14450	4.91154e-12	2
ENSMUSG00000045055	Rpsa-ps2	4.98204e-12	2
ENSMUSG00000004872	Pax3	5.21242e-12	2
ENSMUSG00000098198	Gm9169	5.45347e-12	2
ENSMUSG00000021741	Gm5457	5.48028e-12	2
ENSMUSG00000081896	Gm5389	5.63482e-12	2
ENSMUSG00000080877	Rpl22-ps1	5.6397e-12	2
ENSMUSG00000083270	Gm13498	5.6397e-12	2
ENSMUSG00000085415	Selenok-ps1	5.89066e-12	2
ENSMUSG00000082461	Gm8844	5.91799e-12	2
ENSMUSG00000083908	Gm6447	6.02043e-12	2
ENSMUSG00000058905	Gm10051	6.0722e-12	2
ENSMUSG00000084153	Gm12186	6.07976e-12	2
ENSMUSG00000081059	Gm11945	6.09269e-12	2
ENSMUSG00000082308	Gm15770	6.09269e-12	2
ENSMUSG00000082727	Gm13260	6.28454e-12	2
ENSMUSG00000084289	Gm6977	6.31543e-12	2
ENSMUSG00000086503	Xist	6.37463e-12	2
ENSMUSG00000052371	Hoxd3os1	6.55316e-12	2
ENSMUSG00000083512	Gm12749	6.64876e-12	2
ENSMUSG00000080836	Gm6444	6.836e-12	2
ENSMUSG00000082875	Gm12598	7.03328e-12	2
ENSMUSG00000084844	Hoxb3os	7.22117e-12	2
ENSMUSG00000071273	Gm5145	7.29826e-12	2
ENSMUSG00000083700	Gm2986	7.3058e-12	2
ENSMUSG00000081223	Gm12247	7.75915e-12	2
ENSMUSG00000063895	Nupl1	8.0995e-12	2
ENSMUSG00000077563	Snora68	8.0995e-12	2
ENSMUSG00000082164	Gm13360	8.0995e-12	2
ENSMUSG00000086724	Gm12833	8.0995e-12	2
ENSMUSG00000090323	Gm5263	8.0995e-12	2
ENSMUSG00000080896	Gm14567	8.10581e-12	2
ENSMUSG00000084104	Gm13578	8.46406e-12	2
ENSMUSG00000061486	Gm5161	8.58959e-12	2
ENSMUSG00000091003	Gm7244	8.66746e-12	2
ENSMUSG00000066809	Gm10180	8.77678e-12	2
ENSMUSG00000030330	Ing4	8.7863e-12	2
ENSMUSG00000086126	Evx1os	8.7863e-12	2
ENSMUSG00000078300	Gm2606	9.01028e-12	2
ENSMUSG00000090319	Gm4462	9.80615e-12	2
ENSMUSG00000082424	Gm13292	1.00101e-11	2
ENSMUSG00000083830	Gm8839	1.00541e-11	2
ENSMUSG00000083764	Gm11516	1.02098e-11	2
ENSMUSG00000083657	Gm12245	1.15874e-11	2
ENSMUSG00000081416	Gm14383	1.23855e-11	2
ENSMUSG00000034324	Tmem132c	1.25546e-11	2
ENSMUSG00000071343	Gm10327	1.34852e-11	2
ENSMUSG00000080002	Gm5566	1.35033e-11	2
ENSMUSG00000091570	Gm7707	1.43089e-11	2
ENSMUSG00000085696	Hoxaas3	1.47578e-11	2
ENSMUSG00000081907	Gm13731	1.53134e-11	2
ENSMUSG00000072978	Gm5830	1.58316e-11	2
ENSMUSG00000059743	Fdps	1.65568e-11	2
ENSMUSG00000081071	Gm9836	1.68827e-11	2
ENSMUSG00000083183	Gm15575	1.91913e-11	2
ENSMUSG00000078291	Gm3940	1.93982e-11	2
ENSMUSG00000072714	Rpl21-ps4	1.96997e-11	2
ENSMUSG00000070526	Peg12	2.03936e-11	2
ENSMUSG00000098761	Gm18821	2.08162e-11	2
ENSMUSG00000049460	Gm8396	2.20305e-11	2
ENSMUSG00000049231	Gm12497	2.27617e-11	2
ENSMUSG00000060068	Gm12222	2.30295e-11	2
ENSMUSG00000044757	Gm6430	2.35405e-11	2
ENSMUSG00000030680	Pagr1a	2.35575e-11	2
ENSMUSG00000080911	Gm11918	2.35575e-11	2
ENSMUSG00000097052	Snhg7	2.40074e-11	2
ENSMUSG00000084213	Hspe1-ps5	2.40317e-11	2
ENSMUSG00000073737	Gm10566	2.47339e-11	2
ENSMUSG00000082076	Gm8659	2.49931e-11	2
ENSMUSG00000081732	Gm15495	2.64566e-11	2
ENSMUSG00000090624	Gm17060	2.76698e-11	2
ENSMUSG00000080831	Gm12529	3.18809e-11	2
ENSMUSG00000081781	Gm14753	3.24908e-11	2
ENSMUSG00000084353	Gm15452	3.25362e-11	2
ENSMUSG00000078162	Gm2574	3.27304e-11	2
ENSMUSG00000083287	Gm13502	3.35196e-11	2
ENSMUSG00000082066	Gm13904	3.56586e-11	2
ENSMUSG00000058745	Gm9174	3.77082e-11	2
ENSMUSG00000021709	Erbin	3.7902e-11	2
ENSMUSG00000082743	Gm12988	4.02037e-11	2
ENSMUSG00000029413	Naaa	4.06075e-11	2
ENSMUSG00000085099	Gm16288	4.11346e-11	2
ENSMUSG00000080746	Rpsa-ps12	4.24158e-11	2
ENSMUSG00000081170	Gm12922	4.29641e-11	2
ENSMUSG00000026494	Kif26b	4.43231e-11	2
ENSMUSG00000058881	Zfp516	4.43231e-11	2
ENSMUSG00000083305	Gm13315	4.53065e-11	2
ENSMUSG00000081917	Gm15209	4.75153e-11	2
ENSMUSG00000083906	Gm15186	4.87563e-11	2
ENSMUSG00000024987	Cyp26a1	4.88054e-11	2
ENSMUSG00000045886	Gm9803	5.25734e-11	2
ENSMUSG00000097979	Gm4691	5.4732e-11	2
ENSMUSG00000085487	Gm15654	5.50971e-11	2
ENSMUSG00000031665	Sall1	5.57764e-11	2
ENSMUSG00000043870	Gm5809	5.5817e-11	2
ENSMUSG00000083240	Gm13453	5.78723e-11	2
ENSMUSG00000083043	Gm13433	6.61813e-11	2
ENSMUSG00000066632	Pgk1-rs7	6.64048e-11	2
ENSMUSG00000081886	Gm6175	6.71067e-11	2
ENSMUSG00000069939	Gm12070	6.8019e-11	2
ENSMUSG00000090957	Gm7535	7.0225e-11	2
ENSMUSG00000081413	Uqcrh-ps2	7.16986e-11	2
ENSMUSG00000080818	Gm9434	7.47291e-11	2
ENSMUSG00000081516	Gm12470	7.53349e-11	2
ENSMUSG00000034220	Gpc1	7.75292e-11	2
ENSMUSG00000081691	Gm11965	7.81591e-11	2
ENSMUSG00000081323	Rpl7l1-ps1	8.21373e-11	2
ENSMUSG00000051537	Gm5124	9.233e-11	2
ENSMUSG00000080994	Gm13464	1.04209e-10	2
ENSMUSG00000046620	Rps11-ps4	1.09498e-10	2
ENSMUSG00000046934	Csl	1.10475e-10	2
ENSMUSG00000040717	Il17rd	1.11305e-10	2
ENSMUSG00000078765	U2af1l4	1.11623e-10	2
ENSMUSG00000082264	Gm12799	1.14831e-10	2
ENSMUSG00000035129	Gm6781	1.19644e-10	2
ENSMUSG00000082836	Gm13612	1.29353e-10	2
ENSMUSG00000081631	Gm12005	1.36263e-10	2
ENSMUSG00000041773	Enc1	1.42484e-10	2
ENSMUSG00000081705	Gm12582	1.66477e-10	2
ENSMUSG00000045455	Gm9797	1.68025e-10	2
ENSMUSG00000066720	Cldn9	1.8743e-10	2
ENSMUSG00000084238	Gm13076	1.8743e-10	2
ENSMUSG00000087233	Gm43213	1.8743e-10	2
ENSMUSG00000091460	Gm7808	1.8743e-10	2
ENSMUSG00000039081	Zfp503	1.9621e-10	2
ENSMUSG00000081151	Gm11448	1.9621e-10	2
ENSMUSG00000082189	Gm4784	2.08105e-10	2
ENSMUSG00000082330	Ldha-ps	2.11437e-10	2
ENSMUSG00000041247	Lamp3	2.15411e-10	2
ENSMUSG00000084006	Gm14245	2.25129e-10	2
ENSMUSG00000022788	Fgd4	2.29697e-10	2
ENSMUSG00000094597	Gm4810	2.34917e-10	2
ENSMUSG00000085566	A730017L22Rik	2.57662e-10	2
ENSMUSG00000093651	Gm5873	2.57702e-10	2
ENSMUSG00000084220	Gm12387	2.9295e-10	2
ENSMUSG00000030494	Rhpn2	3.2466e-10	2
ENSMUSG00000066245	Gm10156	3.6443e-10	2
ENSMUSG00000081402	Gm15455	3.9167e-10	2
ENSMUSG00000086229	Gm4887	3.97224e-10	2
ENSMUSG00000083169	Gm6580	3.97898e-10	2
ENSMUSG00000087370	Tmem170b	4.07898e-10	2
ENSMUSG00000027954	Efna1	4.22557e-10	2
ENSMUSG00000071052	Rpl7a-ps5	4.59766e-10	2
ENSMUSG00000074868	Gm6478	4.60657e-10	2
ENSMUSG00000081173	Gm13500	4.71371e-10	2
ENSMUSG00000021318	Gli3	4.83462e-10	2
ENSMUSG00000074505	Fat3	4.85199e-10	2
ENSMUSG00000084260	Gm12844	4.86073e-10	2
ENSMUSG00000089931	Gm8459	5.12742e-10	2
ENSMUSG00000092837	Rpph1	5.12742e-10	2
ENSMUSG00000093514	Gm28727	5.12742e-10	2
ENSMUSG00000098192	Gm3534	5.33542e-10	2
ENSMUSG00000082457	Gm13776	5.33604e-10	2
ENSMUSG00000079297	Gm2223	5.40738e-10	2
ENSMUSG00000061724	Gm2423	5.41813e-10	2
ENSMUSG00000055771	Gm7936	5.72363e-10	2
ENSMUSG00000083860	Gm13313	6.64144e-10	2
ENSMUSG00000035403	Crb2	6.7425e-10	2
ENSMUSG00000057315	Arhgap24	9.00805e-10	2
ENSMUSG00000050368	Hoxd10	9.70399e-10	2
ENSMUSG00000094374	Gm5435	9.95674e-10	2
ENSMUSG00000000942	Hoxa4	9.97008e-10	2
ENSMUSG00000081544	Gm13077	1.00341e-09	2
ENSMUSG00000083186	Gm11805	1.01855e-09	2
ENSMUSG00000046372	Gm5590	1.02647e-09	2
ENSMUSG00000081068	Gm12804	1.14475e-09	2
ENSMUSG00000048538	Gm9826	1.19557e-09	2
ENSMUSG00000074978	Actg-ps1	1.24288e-09	2
ENSMUSG00000029223	Uchl1	1.31144e-09	2
ENSMUSG00000082301	Gm14032	1.31642e-09	2
ENSMUSG00000097032	4930539J05Rik	1.37606e-09	2
ENSMUSG00000081565	Rps12-ps5	1.5362e-09	2
ENSMUSG00000082078	Gm12098	1.66879e-09	2
ENSMUSG00000073233	Gm9144	1.7015e-09	2
ENSMUSG00000005893	Nr2c2	1.74454e-09	2
ENSMUSG00000090099	Gm8837	1.78873e-09	2
ENSMUSG00000081070	Gm13181	1.79404e-09	2
ENSMUSG00000093862	Gm5117	1.86674e-09	2
ENSMUSG00000019817	Plagl1	1.87215e-09	2
ENSMUSG00000066270	Gm10157	1.92497e-09	2
ENSMUSG00000000690	Hoxb6	1.95969e-09	2
ENSMUSG00000082458	Gm9430	1.95969e-09	2
ENSMUSG00000081278	Gm13186	2.01669e-09	2
ENSMUSG00000024598	Fbn2	2.06706e-09	2
ENSMUSG00000020186	Csrp2	2.1035e-09	2
ENSMUSG00000081553	Ccdc50-ps	2.21791e-09	2
ENSMUSG00000083027	Gm13140	2.24879e-09	2
ENSMUSG00000082996	Gm6238	2.27334e-09	2
ENSMUSG00000097366	Gm8177	2.33253e-09	2
ENSMUSG00000073554	Gm6960	2.337e-09	2
ENSMUSG00000082755	Gm8692	2.49048e-09	2
ENSMUSG00000082709	Gm12362	2.51305e-09	2
ENSMUSG00000081744	Gm5721	2.77511e-09	2
ENSMUSG00000096157	Gm5472	3.11023e-09	2
ENSMUSG00000086567	Gm2830	3.22912e-09	2
ENSMUSG00000027777	Schip1	3.28994e-09	2
ENSMUSG00000029245	Epha5	3.29366e-09	2
ENSMUSG00000093149	Gm23374	3.33037e-09	2
ENSMUSG00000082467	Gm6743	3.41056e-09	2
ENSMUSG00000082625	Gm15204	3.55846e-09	2
ENSMUSG00000036040	Adamtsl2	3.61832e-09	2
ENSMUSG00000084115	Gm13566	3.61832e-09	2
ENSMUSG00000082762	Gm12366	3.64118e-09	2
ENSMUSG00000084186	Rpl36-ps10	3.75515e-09	2
ENSMUSG00000078308	Gm47854	3.83851e-09	2
ENSMUSG00000002028	Kmt2a	4.02761e-09	2
ENSMUSG00000070880	Gad1	4.06711e-09	2
ENSMUSG00000081624	Gm6912	4.08761e-09	2
ENSMUSG00000031673	Cdh11	4.55987e-09	2
ENSMUSG00000082247	Gm16074	4.60789e-09	2
ENSMUSG00000055110	A630012P03Rik	4.62635e-09	2
ENSMUSG00000081805	Gm14335	4.6282e-09	2
ENSMUSG00000083474	Gm15267	5.14654e-09	2
ENSMUSG00000089803	Gm10171	5.25519e-09	2
ENSMUSG00000038679	Trps1	6.08488e-09	2
ENSMUSG00000081390	Gm14538	7.18656e-09	2
ENSMUSG00000043668	Tox3	7.36369e-09	2
ENSMUSG00000057223	Gm6578	8.41802e-09	2
ENSMUSG00000037722	Gnpnat1	8.45283e-09	2
ENSMUSG00000098115	Gm8816	8.98759e-09	2
ENSMUSG00000028369	Svep1	9.34638e-09	2
ENSMUSG00000057967	Fgf18	9.34638e-09	2
ENSMUSG00000065265	Gm23455	9.34638e-09	2
ENSMUSG00000079677	Fdx1l	9.34638e-09	2
ENSMUSG00000082415	Gm12486	9.34638e-09	2
ENSMUSG00000083061	Gm12191	9.55365e-09	2
ENSMUSG00000082519	Vamp7-ps	1.03042e-08	2
ENSMUSG00000083328	Gm11826	1.17986e-08	2
ENSMUSG00000082453	Gm11502	1.3121e-08	2
ENSMUSG00000080966	Gm6263	1.38038e-08	2
ENSMUSG00000025321	Itgb8	1.43086e-08	2
ENSMUSG00000094437	Gm9830	1.45461e-08	2
ENSMUSG00000083962	Gm15707	1.62699e-08	2
ENSMUSG00000068969	Rpl32-ps	1.72692e-08	2
ENSMUSG00000081505	Gm8644	1.79918e-08	2
ENSMUSG00000082566	Gm11485	1.83787e-08	2
ENSMUSG00000082774	Gm8805	2.00171e-08	2
ENSMUSG00000082315	Gm16523	2.01797e-08	2
ENSMUSG00000084076	Gm14600	2.10098e-08	2
ENSMUSG00000081073	Gm13758	2.30879e-08	2
ENSMUSG00000085133	B930095G15Rik	2.34358e-08	2
ENSMUSG00000065663	Gm22579	2.36863e-08	2
ENSMUSG00000025646	Atrip	2.39174e-08	2
ENSMUSG00000082473	Kif22-ps	2.52174e-08	2
ENSMUSG00000096401	Gm21811	2.56883e-08	2
ENSMUSG00000026074	Map4k4	2.57996e-08	2
ENSMUSG00000084259	Gm12040	2.68914e-08	2
ENSMUSG00000052407	Ccdc171	2.69635e-08	2
ENSMUSG00000095403	Gm21092	2.7461e-08	2
ENSMUSG00000091876	Gm3851	3.02782e-08	2
ENSMUSG00000031604	Msmo1	3.3151e-08	2
ENSMUSG00000027070	Lrp2	3.31668e-08	2
ENSMUSG00000027365	Trpm7	3.63487e-08	2
ENSMUSG00000074780	Anapc15-ps	3.68763e-08	2
ENSMUSG00000038112	AW551984	3.73849e-08	2
ENSMUSG00000083171	Gm12321	3.80803e-08	2
ENSMUSG00000083757	Rps15a-ps4	3.98015e-08	2
ENSMUSG00000094410	Gm38394	4.03092e-08	2
ENSMUSG00000083725	Gm11865	4.19483e-08	2
ENSMUSG00000024304	Cdh2	4.33942e-08	2
ENSMUSG00000025478	Dpysl4	4.52803e-08	2
ENSMUSG00000074794	Arrdc3	4.56722e-08	2
ENSMUSG00000084129	Hmgb1-ps1	4.61837e-08	2
ENSMUSG00000021136	Smoc1	4.93438e-08	2
ENSMUSG00000083545	Gm13320	5.04218e-08	2
ENSMUSG00000039224	D1Pas1	5.34405e-08	2
ENSMUSG00000029729	Zkscan1	5.46118e-08	2
ENSMUSG00000052713	Zfp608	5.56254e-08	2
ENSMUSG00000083356	Gm11708	5.59482e-08	2
ENSMUSG00000081254	Gm12112	5.7543e-08	2
ENSMUSG00000025885	Myo5b	5.88787e-08	2
ENSMUSG00000053656	Dancr	5.88787e-08	2
ENSMUSG00000064797	Gm24357	5.88787e-08	2
ENSMUSG00000084338	Gm13531	5.88787e-08	2
ENSMUSG00000026123	Plekhb2	5.9153e-08	2
ENSMUSG00000028525	Pde4b	6.30278e-08	2
ENSMUSG00000045327	6330549D23Rik	6.3442e-08	2
ENSMUSG00000066878	Gm10184	6.60099e-08	2
ENSMUSG00000021703	Serinc5	6.83246e-08	2
ENSMUSG00000078684	5830417I10Rik	7.01614e-08	2
ENSMUSG00000057762	Gm6169	7.4068e-08	2
ENSMUSG00000020973	Dnaaf2	7.93112e-08	2
ENSMUSG00000037664	Cdkn1c	8.82338e-08	2
ENSMUSG00000028759	Hp1bp3	9.02871e-08	2
ENSMUSG00000038146	Notch3	9.83086e-08	2
ENSMUSG00000024052	Lpin2	1.00882e-07	2
ENSMUSG00000070025	Gm10284	1.09085e-07	2
ENSMUSG00000003992	Ssbp2	1.12633e-07	2
ENSMUSG00000020644	Id2	1.24823e-07	2
ENSMUSG00000021067	Sav1	1.28829e-07	2
ENSMUSG00000021458	2010111I01Rik	1.40767e-07	2
ENSMUSG00000023886	Smoc2	1.43816e-07	2
ENSMUSG00000031891	Hsd11b2	1.43816e-07	2
ENSMUSG00000070425	Xntrpc	1.43816e-07	2
ENSMUSG00000002413	Braf	1.4386e-07	2
ENSMUSG00000081583	Gm14769	1.46584e-07	2
ENSMUSG00000025938	Slco5a1	1.60528e-07	2
ENSMUSG00000057157	Gm6054	1.60528e-07	2
ENSMUSG00000082601	Gm12700	1.71232e-07	2
ENSMUSG00000063001	Gm9701	1.85275e-07	2
ENSMUSG00000055320	Tead1	1.85964e-07	2
ENSMUSG00000051606	2010001K21Rik	2.37515e-07	2
ENSMUSG00000065147	Snora31	2.37515e-07	2
ENSMUSG00000080892	Gm9266	2.59024e-07	2
ENSMUSG00000021360	Gcnt2	2.59046e-07	2
ENSMUSG00000083458	Gm5510	2.60804e-07	2
ENSMUSG00000079889	Gm11951	2.64322e-07	2
ENSMUSG00000082332	Gm13384	2.75987e-07	2
ENSMUSG00000045215	Asxl3	2.85957e-07	2
ENSMUSG00000045104	Gm5514	2.88637e-07	2
ENSMUSG00000039982	Dtx4	2.91296e-07	2
ENSMUSG00000082516	Gm13342	2.92844e-07	2
ENSMUSG00000075394	Hoxc4	3.0533e-07	2
ENSMUSG00000090119	Gm8185	3.0692e-07	2
ENSMUSG00000023026	Dip2b	3.13325e-07	2
ENSMUSG00000094683	Ap3m1-ps	3.14932e-07	2
ENSMUSG00000081128	Gm13328	3.2291e-07	2
ENSMUSG00000082194	Gm12444	3.35558e-07	2
ENSMUSG00000020716	Nf1	3.42499e-07	2
ENSMUSG00000024238	Zeb1	3.44284e-07	2
ENSMUSG00000043219	Hoxa6	3.44801e-07	2
ENSMUSG00000081138	Gm12834	3.44801e-07	2
ENSMUSG00000081775	Gm12420	3.44801e-07	2
ENSMUSG00000081923	Gm9062	3.44801e-07	2
ENSMUSG00000097039	Pvt1	3.53376e-07	2
ENSMUSG00000064208	Gm10145	3.53406e-07	2
ENSMUSG00000038535	Zfp280d	3.79116e-07	2
ENSMUSG00000081259	Gm6893	4.04949e-07	2
ENSMUSG00000019564	Arid3a	4.22087e-07	2
ENSMUSG00000018076	Med13l	4.23899e-07	2
ENSMUSG00000084077	Gm11952	4.2977e-07	2
ENSMUSG00000070834	Gm13015	4.40781e-07	2
ENSMUSG00000082632	Gm13365	4.44832e-07	2
ENSMUSG00000043484	Gm5867	4.6769e-07	2
ENSMUSG00000031987	Egln1	4.89428e-07	2
ENSMUSG00000041313	Slc7a1	5.23829e-07	2
ENSMUSG00000066877	Nck2	5.48649e-07	2
ENSMUSG00000040167	Ikzf5	5.6037e-07	2
ENSMUSG00000024241	Sos1	5.8342e-07	2
ENSMUSG00000079560	Hoxa3	5.8384e-07	2
ENSMUSG00000017652	Cd40	5.91384e-07	2
ENSMUSG00000000948	Gm38393	6.13168e-07	2
ENSMUSG00000040711	Sh3pxd2b	6.27539e-07	2
ENSMUSG00000091233	Gm6434	6.29077e-07	2
ENSMUSG00000098123	Gm4518	6.59281e-07	2
ENSMUSG00000051159	Cited1	6.67053e-07	2
ENSMUSG00000037110	Ralgapa2	6.74098e-07	2
ENSMUSG00000027951	Adar	6.91961e-07	2
ENSMUSG00000081967	Gm14017	7.11473e-07	2
ENSMUSG00000024789	Jak2	7.38661e-07	2
ENSMUSG00000042499	Hoxd11	8.12374e-07	2
ENSMUSG00000081881	Gm14752	8.12374e-07	2
ENSMUSG00000098309	Gtpbp4-ps2	8.12374e-07	2
ENSMUSG00000027848	Olfml3	8.85164e-07	2
ENSMUSG00000022483	Col2a1	8.9016e-07	2
ENSMUSG00000022895	Ets2	9.1222e-07	2
ENSMUSG00000095440	Fignl2	1.02544e-06	2
ENSMUSG00000028553	Angptl3	1.02694e-06	2
ENSMUSG00000051627	Hist1h1e	1.05241e-06	2
ENSMUSG00000007039	Ddah2	1.0633e-06	2
ENSMUSG00000030091	Nup210	1.15209e-06	2
ENSMUSG00000083407	Gm13176	1.18483e-06	2
ENSMUSG00000005958	Ephb3	1.28353e-06	2
ENSMUSG00000089639	Gm2862	1.32453e-06	2
ENSMUSG00000092458	Gm18737	1.32976e-06	2
ENSMUSG00000016028	Celsr1	1.3789e-06	2
ENSMUSG00000081651	Gm15530	1.39757e-06	2
ENSMUSG00000093826	Gm6900	1.44987e-06	2
ENSMUSG00000031523	Dlc1	1.45726e-06	2
ENSMUSG00000036943	Rab8b	1.49538e-06	2
ENSMUSG00000039239	Tgfb2	1.51393e-06	2
ENSMUSG00000027669	Gnb4	1.52523e-06	2
ENSMUSG00000032232	Cgnl1	1.53759e-06	2
ENSMUSG00000085936	2610307P16Rik	1.54348e-06	2
ENSMUSG00000031327	Chic1	1.54983e-06	2
ENSMUSG00000020303	Stc2	1.60119e-06	2
ENSMUSG00000007817	Zmiz1	1.679e-06	2
ENSMUSG00000067224	Gm3695	1.70397e-06	2
ENSMUSG00000081575	Gm12090	1.75841e-06	2
ENSMUSG00000086176	Gm15534	1.75841e-06	2
ENSMUSG00000081670	Gm15697	1.76467e-06	2
ENSMUSG00000074092	Gm6181	1.81047e-06	2
ENSMUSG00000086842	Gm15681	1.81493e-06	2
ENSMUSG00000003847	Nfat5	1.86726e-06	2
ENSMUSG00000022485	Hoxc5	1.87941e-06	2
ENSMUSG00000055435	Maf	1.87941e-06	2
ENSMUSG00000064841	Gm26205	1.87941e-06	2
ENSMUSG00000082567	Gm14896	1.87941e-06	2
ENSMUSG00000096001	2610528A11Rik	1.87941e-06	2
ENSMUSG00000024486	Hbegf	1.92709e-06	2
ENSMUSG00000081600	Gm12286	2.05514e-06	2
ENSMUSG00000042156	Dzip1	2.14164e-06	2
ENSMUSG00000032525	Nktr	2.37743e-06	2
ENSMUSG00000028780	Sema3c	2.39492e-06	2
ENSMUSG00000064080	Fbln2	2.43422e-06	2
ENSMUSG00000083849	Gm13477	2.47947e-06	2
ENSMUSG00000021767	Kat6b	2.48538e-06	2
ENSMUSG00000027366	Sppl2a	2.59545e-06	2
ENSMUSG00000025510	Cd151	2.60939e-06	2
ENSMUSG00000024548	Setbp1	2.68674e-06	2
ENSMUSG00000096976	Gm26882	3.02202e-06	2
ENSMUSG00000089992	G6pd2	3.08992e-06	2
ENSMUSG00000029454	Mapkapk5	3.23119e-06	2
ENSMUSG00000026576	Atp1b1	3.24433e-06	2
ENSMUSG00000094242	Gm5456	3.41372e-06	2
ENSMUSG00000025950	Idh1	3.45563e-06	2
ENSMUSG00000082683	Gm12697	3.45563e-06	2
ENSMUSG00000000085	Scmh1	3.55866e-06	2
ENSMUSG00000019843	Fyn	4.05768e-06	2
ENSMUSG00000080737	Gm6982	4.18457e-06	2
ENSMUSG00000019820	Utrn	4.27882e-06	2
ENSMUSG00000044712	Slc38a6	4.28296e-06	2
ENSMUSG00000082258	Gm15289	4.28296e-06	2
ENSMUSG00000085066	Gm4989	4.28296e-06	2
ENSMUSG00000097469	Gm26733	4.28296e-06	2
ENSMUSG00000068014	Gm14648	4.41066e-06	2
ENSMUSG00000083077	Gm14126	4.80762e-06	2
ENSMUSG00000084331	Gm8163	4.80762e-06	2
ENSMUSG00000083863	Gm13341	4.8801e-06	2
ENSMUSG00000081100	Gm14630	4.88136e-06	2
ENSMUSG00000084086	Gm5761	5.10284e-06	2
ENSMUSG00000074817	Papolb	5.22276e-06	2
ENSMUSG00000092247	Gm20426	5.40207e-06	2
ENSMUSG00000023951	Vegfa	5.40528e-06	2
ENSMUSG00000083318	Gm15192	5.65905e-06	2
ENSMUSG00000042599	Kdm7a	5.69869e-06	2
ENSMUSG00000078370	Gm6316	5.71214e-06	2
ENSMUSG00000000881	Dlg3	5.91755e-06	2
ENSMUSG00000082543	Gm14336	6.12703e-06	2
ENSMUSG00000056268	Dennd1b	6.17203e-06	2
ENSMUSG00000091020	Gm5828	6.21162e-06	2
ENSMUSG00000003282	Plag1	6.43655e-06	2
ENSMUSG00000003233	Dvl3	6.53845e-06	2
ENSMUSG00000057132	Rpgrip1	6.80979e-06	2
ENSMUSG00000001467	Cyp51	6.96819e-06	2
ENSMUSG00000024597	Slc12a2	7.06145e-06	2
ENSMUSG00000040651	Fam208a	7.25126e-06	2
ENSMUSG00000031540	Kat6a	7.85957e-06	2
ENSMUSG00000076448	Mir763	8.13262e-06	2
ENSMUSG00000039960	Rhou	8.72776e-06	2
ENSMUSG00000032547	Ryk	8.81781e-06	2
ENSMUSG00000040363	Bcor	9.15575e-06	2
ENSMUSG00000035437	Rabgap1	9.20877e-06	2
ENSMUSG00000083649	Rasl2-9	9.40165e-06	2
ENSMUSG00000031627	Irf2	9.59663e-06	2
ENSMUSG00000055228	Zfp935	9.59663e-06	2
ENSMUSG00000080760	Gm7571	9.59663e-06	2
ENSMUSG00000083660	Gm11853	9.59663e-06	2
ENSMUSG00000084162	Gm11251	9.59663e-06	2
ENSMUSG00000094411	Snord16a	9.59663e-06	2
ENSMUSG00000082250	Gm12181	9.88029e-06	2
ENSMUSG00000091905	Gm6395	9.98097e-06	2
ENSMUSG00000033487	Fndc3a	1.02353e-05	2
ENSMUSG00000053137	Mapk11	1.04959e-05	2
ENSMUSG00000083207	Gm14780	1.05577e-05	2
ENSMUSG00000082028	Gm1826	1.12993e-05	2
ENSMUSG00000082111	Gm12479	1.13343e-05	2
ENSMUSG00000015659	Serac1	1.18878e-05	2
ENSMUSG00000028226	Mmp16	1.20125e-05	2
ENSMUSG00000062480	Acat3	1.21793e-05	2
ENSMUSG00000044707	Ccnjl	1.27264e-05	2
ENSMUSG00000068923	Syt11	1.27264e-05	2
ENSMUSG00000039646	Vasn	1.33406e-05	2
ENSMUSG00000064350	mt-Ty	1.37151e-05	2
ENSMUSG00000075470	Deaf1	1.39287e-05	2
ENSMUSG00000020680	Taf15	1.39564e-05	2
ENSMUSG00000022656	Nectin3	1.42494e-05	2
ENSMUSG00000013076	Amotl1	1.44481e-05	2
ENSMUSG00000090159	Gm8580	1.50994e-05	2
ENSMUSG00000019699	Akt3	1.5133e-05	2
ENSMUSG00000031453	Rasa3	1.60494e-05	2
ENSMUSG00000053580	Tanc2	1.61883e-05	2
ENSMUSG00000043991	Pura	1.64e-05	2
ENSMUSG00000038393	Txnip	1.74122e-05	2
ENSMUSG00000026765	Lypd6b	1.79792e-05	2
ENSMUSG00000083720	Gm12901	1.80437e-05	2
ENSMUSG00000075277	Haglr	1.80699e-05	2
ENSMUSG00000026193	Fn1	1.91803e-05	2
ENSMUSG00000039801	2410089E03Rik	1.97847e-05	2
ENSMUSG00000031990	Jam3	2.02156e-05	2
ENSMUSG00000066842	Hmcn1	2.06069e-05	2
ENSMUSG00000022893	Adamts1	2.10438e-05	2
ENSMUSG00000045382	Cxcr4	2.11536e-05	2
ENSMUSG00000054178	Gm9938	2.11536e-05	2
ENSMUSG00000077358	Gm26293	2.11536e-05	2
ENSMUSG00000082768	Gm12727	2.15443e-05	2
ENSMUSG00000055296	Tmem245	2.15612e-05	2
ENSMUSG00000083116	Gm13410	2.25121e-05	2
ENSMUSG00000082045	Gm11585	2.31972e-05	2
ENSMUSG00000081369	Gm11896	2.32579e-05	2
ENSMUSG00000084137	Gm9085	2.35823e-05	2
ENSMUSG00000058625	Gm17383	2.35888e-05	2
ENSMUSG00000045952	Gm5548	2.43266e-05	2
ENSMUSG00000020423	Btg2	2.48291e-05	2
ENSMUSG00000034801	Sos2	2.61649e-05	2
ENSMUSG00000009418	Nav1	2.62797e-05	2
ENSMUSG00000082092	Gm14665	2.67461e-05	2
ENSMUSG00000082865	Gm14745	2.70464e-05	2
ENSMUSG00000001729	Akt1	2.71017e-05	2
ENSMUSG00000024524	Gnal	2.71321e-05	2
ENSMUSG00000081453	Gm6767	2.79551e-05	2
ENSMUSG00000028664	Ephb2	2.84939e-05	2
ENSMUSG00000037075	Rnf139	3.10745e-05	2
ENSMUSG00000081758	Gm11460	3.11949e-05	2
ENSMUSG00000041688	Amot	3.27783e-05	2
ENSMUSG00000082596	Gm14227	3.29509e-05	2
ENSMUSG00000027303	Ptpra	3.33818e-05	2
ENSMUSG00000018417	Myo1b	3.44012e-05	2
ENSMUSG00000024427	Spry4	3.60995e-05	2
ENSMUSG00000097388	Gm3200	3.75045e-05	2
ENSMUSG00000056952	Tatdn2	3.82848e-05	2
ENSMUSG00000047881	Rell1	3.83946e-05	2
ENSMUSG00000082125	Gm14679	3.91116e-05	2
ENSMUSG00000025085	Ablim1	3.93937e-05	2
ENSMUSG00000047509	Gm6776	3.93937e-05	2
ENSMUSG00000025278	Flnb	4.03919e-05	2
ENSMUSG00000097410	Gm26668	4.53838e-05	2
ENSMUSG00000080542	Gm22710	4.59158e-05	2
ENSMUSG00000081921	Gm12858	4.59158e-05	2
ENSMUSG00000082243	Gm3810	4.59158e-05	2
ENSMUSG00000082930	Gm13462	4.59158e-05	2
ENSMUSG00000083500	Gm15470	4.59158e-05	2
ENSMUSG00000026490	Cdc42bpa	4.65864e-05	2
ENSMUSG00000022099	Dmtn	4.67594e-05	2
ENSMUSG00000038418	Egr1	4.74392e-05	2
ENSMUSG00000021451	Sema4d	4.91735e-05	2
ENSMUSG00000062458	Gm8623	5.00919e-05	2
ENSMUSG00000023236	Scg5	5.16256e-05	2
ENSMUSG00000022223	Sdr39u1	5.16478e-05	2
ENSMUSG00000082539	Gm15207	5.16478e-05	2
ENSMUSG00000026923	Notch1	5.21671e-05	2
ENSMUSG00000080021	Gm5915	5.31656e-05	2
ENSMUSG00000024270	Slc39a6	5.40278e-05	2
ENSMUSG00000086420	Gm8865	5.4803e-05	2
ENSMUSG00000038872	Zfhx3	5.50403e-05	2
ENSMUSG00000053774	Ubxn7	5.50492e-05	2
ENSMUSG00000093545	Gm5871	5.56437e-05	2
ENSMUSG00000031349	Nsdhl	5.84835e-05	2
ENSMUSG00000028826	Tmem57	5.89065e-05	2
ENSMUSG00000022257	Laptm4b	6.04611e-05	2
ENSMUSG00000024085	Man2a1	6.06092e-05	2
ENSMUSG00000022686	B3gnt5	6.09186e-05	2
ENSMUSG00000081515	Gm12311	6.21273e-05	2
ENSMUSG00000042745	Id1	6.70149e-05	2
ENSMUSG00000022658	Tagln3	6.86535e-05	2
ENSMUSG00000071207	Gm8587	7.17877e-05	2
ENSMUSG00000087153	Gm6483	7.18993e-05	2
ENSMUSG00000028530	Jak1	7.47059e-05	2
ENSMUSG00000000031	H19	7.72698e-05	2
ENSMUSG00000091900	Gm4353	8.17163e-05	2
ENSMUSG00000059495	Arhgef12	8.66578e-05	2
ENSMUSG00000027966	Col11a1	8.69011e-05	2
ENSMUSG00000080316	Spaca6	8.75985e-05	2
ENSMUSG00000021835	Bmp4	8.95768e-05	2
ENSMUSG00000082052	Ywhaq-ps2	9.06902e-05	2
ENSMUSG00000082939	Gm14881	9.57993e-05	2
ENSMUSG00000023905	Tnfrsf12a	9.79862e-05	2
ENSMUSG00000021803	Cdhr1	9.80915e-05	2
ENSMUSG00000036295	Lrrn3	9.80915e-05	2
ENSMUSG00000058101	1700084J12Rik	9.80915e-05	2
ENSMUSG00000080486	Snord100	9.80915e-05	2
ENSMUSG00000082011	Gm15043	9.80915e-05	2
ENSMUSG00000097586	Gm26528	9.80915e-05	2
ENSMUSG00000098967	Gm27845	9.80915e-05	2
ENSMUSG00000082729	Gm14845	9.98633e-05	2
ENSMUSG00000032727	Mier3	9.99265e-05	2
ENSMUSG00000097122	Gm26624	0.000101194	2
ENSMUSG00000028957	Per3	0.000102567	2
ENSMUSG00000090126	4930519F09Rik	0.000102662	2
ENSMUSG00000051413	Plagl2	0.000104406	2
ENSMUSG00000024869	Nudt8	0.000107893	2
ENSMUSG00000089684	Gm14163	0.000109156	2
ENSMUSG00000081541	Gm13940	0.000110086	2
ENSMUSG00000027797	Dclk1	0.000112892	2
ENSMUSG00000037795	N4bp2	0.000113897	2
ENSMUSG00000030691	Fchsd2	0.000116442	2
ENSMUSG00000096980	Gm26526	0.000116454	2
ENSMUSG00000082345	Gm13622	0.000116652	2
ENSMUSG00000034764	1700006J14Rik	0.000119828	2
ENSMUSG00000093384	Gm20689	0.000119828	2
ENSMUSG00000080731	Rps2-ps9	0.000122799	2
ENSMUSG00000020870	Cdc34b	0.000123286	2
ENSMUSG00000049539	Hist1h1a	0.000128134	2
ENSMUSG00000078240	Gm3550	0.000132522	2
ENSMUSG00000032698	Lmo2	0.000135342	2
ENSMUSG00000054752	Fsd1l	0.000139769	2
ENSMUSG00000025352	Gdf11	0.000146665	2
ENSMUSG00000041530	37104	0.000150242	2
ENSMUSG00000078238	Gm12854	0.000157629	2
ENSMUSG00000031558	Slit2	0.000158574	2
ENSMUSG00000022449	Adamts20	0.000161163	2
ENSMUSG00000062866	Phactr2	0.000161166	2
ENSMUSG00000039097	Rln1	0.000164076	2
ENSMUSG00000060989	Gm11847	0.000165533	2
ENSMUSG00000091004	Gm6872	0.00016932	2
ENSMUSG00000028654	Mycl	0.000171063	2
ENSMUSG00000032064	Dixdc1	0.000173372	2
ENSMUSG00000083326	Rpl38-ps1	0.000174569	2
ENSMUSG00000033792	Atp7a	0.000177163	2
ENSMUSG00000034032	Rpap1	0.000179646	2
ENSMUSG00000021047	Nova1	0.000193594	2
ENSMUSG00000029833	Trim24	0.000200222	2
ENSMUSG00000097277	2900076A07Rik	0.000200865	2
ENSMUSG00000030770	Parva	0.0002024	2
ENSMUSG00000081205	Gm5940	0.000206203	2
ENSMUSG00000090665	Gad1-ps	0.000206203	2
ENSMUSG00000032327	Stra6	0.000213618	2
ENSMUSG00000026547	Tagln2	0.000223892	2
ENSMUSG00000033105	Lss	0.00022727	2
ENSMUSG00000044365	Cxxc4	0.000238355	2
ENSMUSG00000042292	Mkl1	0.000244577	2
ENSMUSG00000033948	Zswim5	0.000245008	2
ENSMUSG00000025019	Lcor	0.000247502	2
ENSMUSG00000031517	Gpm6a	0.000256121	2
ENSMUSG00000006527	Sfmbt1	0.000270167	2
ENSMUSG00000081810	Gm11878	0.000274803	2
ENSMUSG00000023008	Fmnl3	0.000284098	2
ENSMUSG00000032815	Fanca	0.000286523	2
ENSMUSG00000021250	Fos	0.00028934	2
ENSMUSG00000075254	Heg1	0.000300814	2
ENSMUSG00000007659	Bcl2l1	0.000301586	2
ENSMUSG00000025060	Slk	0.000304156	2
ENSMUSG00000014077	Chp1	0.000306158	2
ENSMUSG00000023022	Lima1	0.000306583	2
ENSMUSG00000028161	Ppp3ca	0.000307124	2
ENSMUSG00000027993	Trim2	0.000313992	2
ENSMUSG00000025372	Baiap2	0.000319921	2
ENSMUSG00000081748	Gm14870	0.000322694	2
ENSMUSG00000082289	Gm15596	0.000326395	2
ENSMUSG00000078202	Nrarp	0.00032733	2
ENSMUSG00000041570	Camsap2	0.000334718	2
ENSMUSG00000009090	Ap1b1	0.000342205	2
ENSMUSG00000054850	Smim10l2a	0.000342277	2
ENSMUSG00000027907	S100a11	0.0003432	2
ENSMUSG00000020027	Socs2	0.000345029	2
ENSMUSG00000084593	Gm22345	0.000346792	2
ENSMUSG00000091155	Serpine3	0.000346792	2
ENSMUSG00000025964	Adam23	0.000348328	2
ENSMUSG00000050271	Prag1	0.00035404	2
ENSMUSG00000038132	Rbm24	0.000364244	2
ENSMUSG00000082665	Gm11470	0.000365925	2
ENSMUSG00000087819	Gm25117	0.000371447	2
ENSMUSG00000020128	Vps54	0.000372362	2
ENSMUSG00000015222	Map2	0.000377031	2
ENSMUSG00000033004	Mycbp2	0.000388146	2
ENSMUSG00000005886	Ncoa2	0.000388419	2
ENSMUSG00000059142	Zfp945	0.00039015	2
ENSMUSG00000023050	Map3k12	0.000394831	2
ENSMUSG00000048232	Fbxo10	0.000401651	2
ENSMUSG00000086167	Gm13827	0.000402359	2
ENSMUSG00000018474	Chd3	0.000404881	2
ENSMUSG00000082978	Rpsa-ps11	0.00040513	2
ENSMUSG00000082336	Gm8401	0.00040706	2
ENSMUSG00000010721	Lmbr1	0.000409524	2
ENSMUSG00000053877	Srcap	0.000416326	2
ENSMUSG00000052539	Magi3	0.000417742	2
ENSMUSG00000030317	Timp4	0.000427321	2
ENSMUSG00000037419	Endod1	0.000427321	2
ENSMUSG00000064514	Gm22455	0.000427321	2
ENSMUSG00000082852	Gm12021	0.000427321	2
ENSMUSG00000082928	Gm12785	0.000427321	2
ENSMUSG00000084071	Gm13378	0.000427321	2
ENSMUSG00000098088	Gm26916	0.000427321	2
ENSMUSG00000025558	Dock9	0.000428414	2
ENSMUSG00000021143	Pacs2	0.000430516	2
ENSMUSG00000030465	Psd3	0.000430516	2
ENSMUSG00000084390	Gm15425	0.000430516	2
ENSMUSG00000044950	Pwwp2a	0.000449496	2
ENSMUSG00000031290	Lrch2	0.000450005	2
ENSMUSG00000014704	Hoxa2	0.000454394	2
ENSMUSG00000027238	Frmd5	0.000455491	2
ENSMUSG00000081467	Gm13337	0.000464839	2
ENSMUSG00000084303	Gm8216	0.000470464	2
ENSMUSG00000028273	Pdlim5	0.000489227	2
ENSMUSG00000030315	Vgll4	0.000497104	2
ENSMUSG00000015652	Steap1	0.000508974	2
ENSMUSG00000032998	Foxj3	0.000509862	2
ENSMUSG00000039841	Zfp800	0.000516713	2
ENSMUSG00000037210	Fam193a	0.000519603	2
ENSMUSG00000005503	Evx1	0.000527936	2
ENSMUSG00000022221	Ripk3	0.000532678	2
ENSMUSG00000027546	Atp9a	0.000539625	2
ENSMUSG00000050447	Lypd6	0.000551486	2
ENSMUSG00000023809	Rps6ka2	0.000554889	2
ENSMUSG00000028842	37834	0.000555843	2
ENSMUSG00000024483	Ankhd1	0.000564469	2
ENSMUSG00000061619	Vma21-ps	0.000596579	2
ENSMUSG00000024691	Fam111a	0.000601461	2
ENSMUSG00000031465	Angpt2	0.000603762	2
ENSMUSG00000081739	Mdm4-ps	0.000609648	2
ENSMUSG00000042489	Clspn	0.000618368	2
ENSMUSG00000025529	Zfp711	0.00061847	2
ENSMUSG00000065852	Gm22353	0.000627104	2
ENSMUSG00000021314	Amph	0.000633172	2
ENSMUSG00000079311	Gm3222	0.00065542	2
ENSMUSG00000031488	Rab11fip1	0.000681598	2
ENSMUSG00000039697	Ncoa7	0.000685892	2
ENSMUSG00000066538	Gm6254	0.000686169	2
ENSMUSG00000082974	Gm15129	0.000711148	2
ENSMUSG00000060128	Gm2710	0.000713845	2
ENSMUSG00000051306	Usp42	0.000724543	2
ENSMUSG00000035877	Zhx3	0.000733277	2
ENSMUSG00000016534	Lamp2	0.000749388	2
ENSMUSG00000022053	Ebf2	0.000765913	2
ENSMUSG00000083640	Gm8876	0.000768642	2
ENSMUSG00000030451	Herc2	0.000779702	2
ENSMUSG00000086925	Gm6286	0.000792246	2
ENSMUSG00000036617	Etl4	0.000800504	2
ENSMUSG00000094334	Fabp5l2	0.000807822	2
ENSMUSG00000029153	Ociad2	0.000825427	2
ENSMUSG00000070576	Mn1	0.000825427	2
ENSMUSG00000028184	Adgrl2	0.000829964	2
ENSMUSG00000089774	Slc5a3	0.000836131	2
ENSMUSG00000040560	Wdr7	0.000866596	2
ENSMUSG00000024084	Qpct	0.000870983	2
ENSMUSG00000040253	Gbp7	0.000870983	2
ENSMUSG00000064493	Snora28	0.000870983	2
ENSMUSG00000071862	Lrrtm2	0.000870983	2
ENSMUSG00000080533	Mir1191	0.000870983	2
ENSMUSG00000097796	Gm16702	0.000878273	2
ENSMUSG00000042557	Sin3a	0.000900008	2
ENSMUSG00000080716	Gm13503	0.000900008	2
ENSMUSG00000068270	Shroom4	0.000945527	2
ENSMUSG00000055717	Slain1	0.000954854	2
ENSMUSG00000042790	Rnf214	0.000965369	2
ENSMUSG00000032193	Ldlr	0.000989041	2
ENSMUSG00000024236	Svil	0.000989084	2
ENSMUSG00000021690	Jmy	0.000989383	2
ENSMUSG00000099178	Gm8669	0.000994375	2
ENSMUSG00000001995	Sipa1l2	0.00101587	2
ENSMUSG00000014498	Ankrd52	0.00103012	2
ENSMUSG00000017765	Slc12a4	0.0010356	2
ENSMUSG00000030660	Pik3c2a	0.00104392	2
ENSMUSG00000021725	Parp8	0.00105609	2
ENSMUSG00000034587	8430429K09Rik	0.00105818	2
ENSMUSG00000027177	Hipk3	0.00107565	2
ENSMUSG00000023087	Noct	0.00108185	2
ENSMUSG00000000976	Heatr6	0.0010969	2
ENSMUSG00000034189	Hsdl1	0.00110995	2
ENSMUSG00000050035	Fhl4	0.00111939	2
ENSMUSG00000028613	Lrp8	0.00112275	2
ENSMUSG00000036061	Smug1	0.0011297	2
ENSMUSG00000000804	Usp32	0.00113034	2
ENSMUSG00000024143	Rhoq	0.00113035	2
ENSMUSG00000058056	Palld	0.00113562	2
ENSMUSG00000038943	Prc1	0.00115546	2
ENSMUSG00000013698	Pea15a	0.00116755	2
ENSMUSG00000035992	Fnip1	0.00116766	2
ENSMUSG00000025240	Sacm1l	0.00116921	2
ENSMUSG00000026158	Ogfrl1	0.00117831	2
ENSMUSG00000042515	Mum1l1	0.00118908	2
ENSMUSG00000046727	Cystm1	0.00121898	2
ENSMUSG00000045636	Mtus1	0.00125235	2
ENSMUSG00000020282	Rhbdf1	0.00125623	2
ENSMUSG00000038331	Satb2	0.00125773	2
ENSMUSG00000081868	Gm12039	0.00125773	2
ENSMUSG00000019978	Epb41l2	0.00127114	2
ENSMUSG00000049939	Lrrc4	0.00131506	2
ENSMUSG00000036880	Acaa2	0.00133266	2
ENSMUSG00000081494	Gm14130	0.00133266	2
ENSMUSG00000029016	Clcn6	0.00138201	2
ENSMUSG00000078151	Gm12226	0.00138682	2
ENSMUSG00000031681	Smad1	0.00138975	2
ENSMUSG00000098068	Gm7909	0.00139467	2
ENSMUSG00000086370	Ftx	0.00142294	2
ENSMUSG00000015597	Zfp318	0.00144166	2
ENSMUSG00000038346	Zfp384	0.00144186	2
ENSMUSG00000070424	Art5	0.0014495	2
ENSMUSG00000041642	Kif21b	0.00147491	2
ENSMUSG00000048078	Tenm4	0.00156959	2
ENSMUSG00000097623	B230323A14Rik	0.00160332	2
ENSMUSG00000026409	Pfkfb2	0.00165046	2
ENSMUSG00000037188	Grhl3	0.00165046	2
ENSMUSG00000082705	Gm15616	0.00167359	2
ENSMUSG00000080899	Gm9109	0.00168392	2
ENSMUSG00000069862	Rps12-ps9	0.00169465	2
ENSMUSG00000067189	Gm7335	0.00172738	2
ENSMUSG00000022032	Scara5	0.00175004	2
ENSMUSG00000070063	Snora33	0.00175004	2
ENSMUSG00000083289	Gm8812	0.00175004	2
ENSMUSG00000084339	Gm6141	0.00175004	2
ENSMUSG00000089673	Gm16546	0.00175004	2
ENSMUSG00000090216	Gm16549	0.00175004	2
ENSMUSG00000097234	Gm26518	0.00180584	2
ENSMUSG00000054162	Spock3	0.00183759	2
ENSMUSG00000084917	Gm17477	0.00183938	2
ENSMUSG00000084014	Gm7209	0.00186504	2
ENSMUSG00000032336	Nptn	0.00187901	2
ENSMUSG00000097507	Gm26538	0.00189346	2
ENSMUSG00000030967	Zranb1	0.00190518	2
ENSMUSG00000059565	Gm5292	0.00191061	2
ENSMUSG00000057286	St6galnac2	0.00192419	2
ENSMUSG00000052056	Zfp217	0.00192467	2
ENSMUSG00000042331	Specc1	0.00193622	2
ENSMUSG00000037315	Jade3	0.00194608	2
ENSMUSG00000066389	Rpl31-ps1	0.00195732	2
ENSMUSG00000032846	Zswim6	0.00204046	2
ENSMUSG00000037936	Scarb1	0.00205702	2
ENSMUSG00000034101	Ctnnd1	0.00211985	2
ENSMUSG00000018169	Mfng	0.00213212	2
ENSMUSG00000083372	Gm11235	0.00213476	2
ENSMUSG00000023764	Sfi1	0.00213647	2
ENSMUSG00000066406	Akap13	0.00213758	2
ENSMUSG00000080773	Gm12955	0.00216159	2
ENSMUSG00000083438	Gm5402	0.00221347	2
ENSMUSG00000025880	Smad7	0.00225859	2
ENSMUSG00000027030	Stk39	0.00227472	2
ENSMUSG00000089791	Gm3555	0.00235068	2
ENSMUSG00000036377	C530008M17Rik	0.00238231	2
ENSMUSG00000056919	Cep162	0.00244405	2
ENSMUSG00000082512	Gm13937	0.00244655	2
ENSMUSG00000081459	Llph-ps1	0.00245645	2
ENSMUSG00000036792	Mbd5	0.00250877	2
ENSMUSG00000045205	Dpy19l4	0.00252491	2
ENSMUSG00000023965	Fbxl17	0.00252766	2
ENSMUSG00000030319	Cand2	0.00261565	2
ENSMUSG00000032402	Smad3	0.00262288	2
ENSMUSG00000038576	Susd4	0.00262288	2
ENSMUSG00000002733	Plekha3	0.0026555	2
ENSMUSG00000092577	Gm7393	0.00267765	2
ENSMUSG00000064348	mt-Tn	0.0026788	2
ENSMUSG00000038059	Smim3	0.00272041	2
ENSMUSG00000005534	Insr	0.00272259	2
ENSMUSG00000022500	Litaf	0.0027386	2
ENSMUSG00000026269	Rnpepl1	0.0027671	2
ENSMUSG00000059049	Frem1	0.00285571	2
ENSMUSG00000075592	Nynrin	0.00287299	2
ENSMUSG00000029913	Prdm5	0.0028762	2
ENSMUSG00000027087	Itgav	0.00292505	2
ENSMUSG00000021366	Hivep1	0.00293147	2
ENSMUSG00000039770	Ypel5	0.00294196	2
ENSMUSG00000015653	Steap2	0.0029679	2
ENSMUSG00000021027	Ralgapa1	0.00310301	2
ENSMUSG00000058258	Idi1	0.0031227	2
ENSMUSG00000085663	Gm15718	0.0031557	2
ENSMUSG00000090114	Gm3076	0.00315728	2
ENSMUSG00000005501	Usp40	0.00319583	2
ENSMUSG00000020491	2810021J22Rik	0.00323604	2
ENSMUSG00000038664	Herc1	0.00333064	2
ENSMUSG00000025239	Limd1	0.00334324	2
ENSMUSG00000023927	Satb1	0.0034049	2
ENSMUSG00000018341	Il12rb2	0.00346899	2
ENSMUSG00000021613	Hapln1	0.00346899	2
ENSMUSG00000023868	Pde10a	0.00346899	2
ENSMUSG00000077212	Snord69	0.00346899	2
ENSMUSG00000077440	Gm23130	0.00346899	2
ENSMUSG00000077526	Gm25379	0.00346899	2
ENSMUSG00000081325	Gm12599	0.00346899	2
ENSMUSG00000082514	Gm11452	0.00346899	2
ENSMUSG00000089877	Gm16102	0.00346899	2
ENSMUSG00000092730	Snora24	0.00346899	2
ENSMUSG00000096280	Gm23287	0.00346899	2
ENSMUSG00000040612	Ildr2	0.00347693	2
ENSMUSG00000027799	Nbea	0.00353422	2
ENSMUSG00000073664	Nbeal1	0.00354003	2
ENSMUSG00000029108	Pcdh7	0.00357123	2
ENSMUSG00000081160	Gm14897	0.00357846	2
ENSMUSG00000042744	Hectd4	0.00374295	2
ENSMUSG00000058756	Thra	0.00378103	2
ENSMUSG00000021068	Nin	0.00380963	2
ENSMUSG00000030022	Adamts9	0.00384037	2
ENSMUSG00000028799	Zfp362	0.0040105	2
ENSMUSG00000087635	Gm13414	0.00402421	2
ENSMUSG00000044636	Csrnp2	0.00408096	2
ENSMUSG00000028053	Ash1l	0.0041003	2
ENSMUSG00000082051	Gm16072	0.00415761	2
ENSMUSG00000078671	Chd2	0.00418056	2
ENSMUSG00000025137	Pcyt2	0.00428505	2
ENSMUSG00000020044	Timp3	0.004366	2
ENSMUSG00000028078	Dclk2	0.00437357	2
ENSMUSG00000022412	Mief1	0.00442314	2
ENSMUSG00000081733	Gm12852	0.00442728	2
ENSMUSG00000009876	Cox4i2	0.00444302	2
ENSMUSG00000020623	Map2k6	0.00450204	2
ENSMUSG00000021978	Extl3	0.0047314	2
ENSMUSG00000052684	Jun	0.00476695	2
ENSMUSG00000037012	Hk1	0.00484081	2
ENSMUSG00000081656	Gm11246	0.00486338	2
ENSMUSG00000037395	Rcor3	0.0049289	2
ENSMUSG00000025323	Sp4	0.00495354	2
ENSMUSG00000080772	Gm12543	0.00496512	2
ENSMUSG00000028653	Trit1	0.0050442	2
ENSMUSG00000030064	Frmd4b	0.00515041	2
ENSMUSG00000035356	Nfkbiz	0.00519138	2
ENSMUSG00000081152	Gm12430	0.00520268	2
ENSMUSG00000025268	Maged2	0.00531053	2
ENSMUSG00000006445	Epha2	0.00533683	2
ENSMUSG00000020070	Rufy2	0.00534657	2
ENSMUSG00000032702	Kank1	0.00543685	2
ENSMUSG00000006800	Sulf2	0.00551041	2
ENSMUSG00000037270	4932438A13Rik	0.00551041	2
ENSMUSG00000029534	St7	0.00563427	2
ENSMUSG00000037965	Zc3h7a	0.00572703	2
ENSMUSG00000066487	Gm5786	0.00573331	2
ENSMUSG00000058869	Gm4832	0.00574305	2
ENSMUSG00000062327	T	0.00574305	2
ENSMUSG00000070056	Mfhas1	0.00598768	2
ENSMUSG00000083281	Gm13332	0.00605523	2
ENSMUSG00000020593	Lpin1	0.00615013	2
ENSMUSG00000054611	Kdm2a	0.00616195	2
ENSMUSG00000020289	Nprl3	0.00626148	2
ENSMUSG00000025757	Hspa4l	0.00627911	2
ENSMUSG00000038545	Cul7	0.00638038	2
ENSMUSG00000082912	Gm8770	0.00639394	2
ENSMUSG00000016487	Ppfibp1	0.00640971	2
ENSMUSG00000041977	Arhgef11	0.00650322	2
ENSMUSG00000096361	Gm5814	0.00656856	2
ENSMUSG00000021552	Gkap1	0.00668923	2
ENSMUSG00000083174	Gm7190	0.00676143	2
ENSMUSG00000019944	Rhobtb1	0.00677457	2
ENSMUSG00000026715	Serpinc1	0.00677457	2
ENSMUSG00000047495	Dlgap2	0.00677457	2
ENSMUSG00000059877	Dph3b-ps	0.00677457	2
ENSMUSG00000062432	Cyp26c1	0.00677457	2
ENSMUSG00000065649	Snora74a	0.00677457	2
ENSMUSG00000066958	Gm16391	0.00677457	2
ENSMUSG00000068113	Gm4907	0.00677457	2
ENSMUSG00000080735	Gm12075	0.00677457	2
ENSMUSG00000083218	Gm16425	0.00677457	2
ENSMUSG00000083699	Gm14932	0.00677457	2
ENSMUSG00000088059	Mir1949	0.00677457	2
ENSMUSG00000038368	Focad	0.00692729	2
ENSMUSG00000083897	Gm14843	0.0069546	2
ENSMUSG00000081242	Gm15719	0.00706777	2
ENSMUSG00000082169	Gm12369	0.00708141	2
ENSMUSG00000019971	Cep290	0.00711226	2
ENSMUSG00000041258	Zfp236	0.00716177	2
ENSMUSG00000028944	Prkag2	0.00717861	2
ENSMUSG00000036879	Phkb	0.00721184	2
ENSMUSG00000040852	Plekhh2	0.00721184	2
ENSMUSG00000017754	Pltp	0.00727328	2
ENSMUSG00000082920	Gm13864	0.00740816	2
ENSMUSG00000089706	B230216N24Rik	0.00745995	2
ENSMUSG00000086537	Nespas	0.00771001	2
ENSMUSG00000024059	Clip4	0.00789376	2
ENSMUSG00000025272	Tro	0.00789482	2
ENSMUSG00000036779	Papd5	0.00802034	2
ENSMUSG00000031309	Rps6ka3	0.0080438	2
ENSMUSG00000093124	Gm24366	0.00817093	2
ENSMUSG00000037824	Tspan14	0.00826181	2
ENSMUSG00000081718	Gm8261	0.00830186	2
ENSMUSG00000062175	Tgif2	0.00830418	2
ENSMUSG00000036667	Tcaf1	0.00835568	2
ENSMUSG00000040026	Saa3	0.00856222	2
ENSMUSG00000071793	2610005L07Rik	0.00875681	2
ENSMUSG00000068040	Tm9sf4	0.00885211	2
ENSMUSG00000074026	Gm6091	0.00885211	2
ENSMUSG00000097953	Gm26952	0.0089394	2
ENSMUSG00000036501	Fam13b	0.00894557	2
ENSMUSG00000046442	Ppm1e	0.00897167	2
ENSMUSG00000049799	Lrrc19	0.00897167	2
ENSMUSG00000041297	Cdk13	0.00901523	2
ENSMUSG00000023066	Rttn	0.00902772	2
ENSMUSG00000042436	Mfap4	0.00904604	2
ENSMUSG00000025920	Stau2	0.00907413	2
ENSMUSG00000026042	Col5a2	0.00907413	2
ENSMUSG00000030019	Fbxl14	0.00929577	2
ENSMUSG00000030729	Pgm2l1	0.00930433	2
ENSMUSG00000097379	Gm26873	0.00967585	2
ENSMUSG00000020393	Kremen1	0.00985446	2
