# Supplementary material for: A Tgfbr1/Snai1-dependent developmental module at the core of vertebrate axial elongation
Source: eLife. 2020 Jun 29;9:e56615. doi: 10.7554/eLife.56615 (PMC7324159; doi:10.7554/eLife.56615)
Supplement: Figure 2—source data 1. [file elife-56615-fig2-data1.xlsx]

## Sheet: EHF_RPKM
Gene.stable.ID	Gene.name	EHF_A10_S10	EHF_A11_S11	EHF_A12_S12	EHF_A1_S1	EHF_A2_S2	EHF_A3_S3	EHF_A4_S4	EHF_A5_S5	EHF_A6_S6	EHF_A7_S7	EHF_A8_S8	EHF_A9_S9	EHF_B10_S22	EHF_B11_S23	EHF_B12_S24	EHF_B1_S13	EHF_B2_S14	EHF_B3_S15	EHF_B4_S16	EHF_B5_S17	EHF_B6_S18	EHF_B7_S19	EHF_B8_S20	EHF_B9_S21	EHF_C10_S33	EHF_C11_S34	EHF_C12_S35	EHF_C1_S25	EHF_C2_S26	EHF_C3_S27	EHF_C4_S28	EHF_C5_S29	EHF_C6_S30	EHF_C8_S31	EHF_C9_S32	EHF_D10_S44	EHF_D11_S45	EHF_D12_S46	EHF_D1_S36	EHF_D3_S37	EHF_D4_S38	EHF_D5_S39	EHF_D6_S40	EHF_D7_S41	EHF_D8_S42	EHF_D9_S43	EHF_E10_S55	EHF_E11_S56
ENSMUSG00000000001	Gnai3	272.781969661313	348.168840970908	45.1304800490796	155.389382123293	176.180460247121	144.110214593772	119.361302258603	1.71295325591063	218.730675317625	97.9075969511941	35.8667025477159	217.005960968592	73.9304799031437	206.968221575795	168.015083335152	247.626804124629	86.5705242336963	110.004336734713	55.820161481796	55.5758669220173	73.9812800584922	0	304.183913525346	117.486721761105	125.931942225917	50.5647704171932	423.920823490416	114.661170112791	22.1297284005106	110.514662550823	107.702204218731	135.796013713128	82.4301487578867	185.623359014946	104.297772093587	51.3748263288228	56.411842600457	50.3345912391494	108.963572917524	45.4112996379189	150.187676571482	57.7179733786117	202.108938365744	123.998162125624	102.824202353813	93.5428341363331	194.056675263642	63.5427990916293
ENSMUSG00000000003	Pbsn	0	0	0	0	0	0	0	0	0	0	0	0	0	0	0	0	0	0	0	0	0	0	0	0	0	0	0	0	0	0	0	0	0	0	0	0	0	0	0	0	0	0	0	0	0	0	0	0
ENSMUSG00000000028	Cdc45	46.6836741311263	0	0	124.339969801576	9.70609649525423	0	20.1532510743925	24.8119605718494	63.7977107057199	3.42556033128679	93.3025715603104	0	100.384629661404	43.8312485173872	14.5710900920034	97.0402452986038	79.1272402093859	4.91986695283152	70.7035651141096	0.171644137122956	0	0	0	42.5866738765827	0	82.9222115690161	0	18.8474882948357	42.3194012313135	35.384183940445	0	20.0142511281472	73.4589764993463	0.219847606018872	42.1874160128587	0	0	0	29.8209193858108	0	127.926686888493	0.999250046851837	70.6860448217383	11.4644761588881	31.3666914144184	58.1448345501309	45.5820321667228	63.4950360794669
ENSMUSG00000000031	H19	0	0	0	0	0	18.6129046565127	0	2.55532935401547	25.1584017902431	0	0	8.87417782467989	0	0.109035847098308	0.567619700522257	0	22.4676875610661	0	0	18.5414741554901	0	25.5911542893526	6.49952403985456	0	0	10.1903740875694	8.89591894092517	0	0	0	0	0	0	0	0	0	23.9079871988377	0	0	108.551765361899	111.066909594262	0	61.2734445083292	0	8.17699060412055	0	0	19.0498122183078
ENSMUSG00000000037	Scml2	0	0	0.126459944860123	0	0	0	0	0	0	0	0	0	20.9884888787054	13.1047492362174	0	12.4024425369793	0	0	0	0	0	0	22.0212626623446	0	0	0.119529195331139	0	0	0	0	0	0	0	0	0	0	0	0	0	0	0	0	0	0	5.38674040646817	0	0	0
ENSMUSG00000000049	Apoh	0	0	0	0	0	0	0	0	0	0	0	0	0	0	0	0	0	0	0	0	0	0	0	0	0	0	0	0	0	0	0	0	0	0	0	0	0	0	0	0	0	0	0	0	0	0	0	0
ENSMUSG00000000056	Narf	6.62008997879794	0	0	11.718688779909	0	5.80705806060154	43.3403704556058	0	0.367930969645075	0	21.2802847161264	23.3005126820385	0	0	20.9190181765506	21.5419854568042	6.84991409033819	2.08225692734716	0.166903491371485	0	13.4126685299915	0	14.0249453896644	5.0479819629976	0	0.453569274917598	0.246133331024012	17.9002368114674	13.7544704990974	0	0	29.3449926398251	0	25.7540994982574	0	0.282728824585181	0	20.515261455929	11.9286098981436	0	15.5132653649522	12.486120713055	0	34.0228884648706	10.4150212758113	0	26.3260509212872	0
ENSMUSG00000000058	Cav2	0	0	0	0	0	0	0	0	0	0	0	0	0	0	0	0	0	0	0	0	0	0	0	0	0	0	0	0	0	0	0	0	0	0	0	0	0	0	0	0	0	0	0	7.06244780825604	0	0	0	0
ENSMUSG00000000078	Klf6	7.56079786237134	11.2525879815042	24.1602142252441	20.4135926726416	5.05452248228939	0	4.24317619859221	0	0	32.3261804453346	0	22.1882514956507	11.1316728195871	5.00904374326363	0	12.6910342211743	0	0	14.3402065800983	0	0	0	6.92555818894305	0	0	0	0	8.82289419791844	3.14018704940881	12.9998118450857	0	0	19.0123107548821	0	22.5772623910864	0	14.5103133420411	1.11343088952265	9.57440052949608	0	3.28303513848601	0	0	0.103153580928358	43.3601845882306	18.8908652488124	0	11.9038383025951
ENSMUSG00000000085	Scmh1	0.939384636106697	0	0	0	0	0	0	0	0	0	0	0	0	0	7.43537020720333	0	0	0	0.10375607030544	0	0	0	0.608277946618359	0	0	0	0	0	0	0.346877876554167	0.095973844426306	9.27792429585531	0	0	0	0	0	0	0	0	13.4897627584999	0	0	0	0	6.05450538213064	0	0
ENSMUSG00000000088	Cox5a	25.0194274496184	46.3629272325854	125.868634770496	61.9187576493003	43.215281462852	26.3595279925101	38.4282447952148	36.2359729750757	17.0431194013866	23.1320703265895	50.9511868630174	30.4018847893999	31.817924991076	77.7491499152111	54.1656705177093	47.9767249882176	53.0447866529394	35.7234416688379	72.5398639271576	47.2829354487531	101.63160705088	64.8805990164996	30.4404172071246	60.2617863437916	36.7390601100241	32.1634802441092	78.8235842199887	32.8114115070572	20.0746196311452	35.5568102542906	59.6828037710144	118.566458777243	104.090851087684	66.9240807645302	27.1674155744875	58.2063425921343	59.3794498383145	45.7647829791756	53.5334794275674	38.6826438659004	98.0966182262853	78.1878680163039	92.5287421730088	41.1770339869474	61.0077011700012	61.1957036776199	80.1044565597989	38.1756479247639
ENSMUSG00000000093	Tbx2	0	0	0	0	0	0	0	0	0	0	0	0	0	0	0	0	0	0	0	0	0	0	0	0	0	0	0	0	0	0	0	0	0	0	0	0	0	0	0	0	0	0	0	0	0	0	0	0
ENSMUSG00000000094	Tbx4	0	0	0	0	0	0	0	0	0	0	0	0	0	0	0	0	0	0	0	0	0	0	0	0	0	0	0	0	0	0	0	0	0	0	0	0	0	0	0	0	0	0	0	0	0	0	0	0
ENSMUSG00000000103	Zfy2	0	0	0	0	0	0	0	0	0	0	0	0	0	0	0	0	0	0	0	0	0	0	0	0	0	0	0	0	0	0	0	0	0	0	0	0	0	0	0	0	0	0	0	0	0	0	0	0
ENSMUSG00000000120	Ngfr	0	0	0	0	0	0	0	0	0	0	0	0	0	0	0	0	0	0	0	0	0	0	0	0	0	0	0	0	0	0	0	0	0	0	0	0	0	13.478297400172	0	28.4640684519681	0	91.2052963057488	0	0	0	0	0	0
ENSMUSG00000000125	Wnt3	0	0	26.6163444446356	0	0	0	0	0	0	0	0	0	0	0	0	0	0	0	14.4729092860827	0	0	0	0	2.58794206963942	0	0	0	0	0	0	0	0	0	0	0	0	0	0	0	0	0	27.31196833736	0	0	0	0	0	0
ENSMUSG00000000126	Wnt9a	0	0	0	0	0	0	0	0	0	0	0	0	0	0	0	0	0	0	0	0	0	0	0	0	0	0	0	0	0	0	0	0	0	0	0	0	0.401524130295344	0	0	0	0	0	0	1.36061091575975	0	0	0	0
ENSMUSG00000000127	Fer	0	24.897120413727	0	0	2.61431921547515	0	26.2735332448228	0	0	0	0	0	0	0	0	20.7648801313304	0	13.3782288168726	0	0	14.3845366657739	0	6.04806576361528	0	40.5398670167327	0.104609556351568	0	0	36.8996577084525	14.450429235197	22.2186220244792	0	0	6.70012957427627	0	0	0	0	0	0	0	30.8853525374775	0	24.1276314896164	0.134696207193945	0	0	0.0864960797526655
ENSMUSG00000000131	Xpo6	0	0.980359401325101	1.90824469277759	1.5939804726403	5.46552605883883	9.04621110813488	9.14817676989446	6.23327187971227	1.4631127282269	1.86931936470669	0.023519480168912	1.6963968773078	6.90347830144114	2.98031315402041	4.45641849984495	1.00097127730291	3.85563386119446	13.6878329993122	7.86967717507125	6.78505622044126	8.23862462857494	7.77964490485478	15.1565176782535	0.0224037763317879	8.45827032685534	4.46620979642265	23.2108968035027	3.92275479878187	26.9405210321311	6.02275938642612	8.55111638863212	3.00755600152627	5.90262223611439	4.71102755375145	2.33034236686956	7.78978066801234	7.05730075598617	4.69547691095017	4.87260147176753	1.70364185645649	5.51136249569676	6.73852025290723	11.4062748658873	8.51284071432281	29.1683760993926	12.3262098261788	6.3254916209006	8.11366456479434
ENSMUSG00000000134	Tfe3	0	1.48625915069695	0	2.05569081705626	1.16196147256734	0	4.28163956128547	0	3.10274148600111	0	12.9770846070957	0	0	0	0	0.943892160295673	2.7720651613346	5.86604991944032	4.50396127152906	0	8.74414093779218	0	5.85645356741915	0	0	0	0	0	0	0.206836107149819	5.76850372213622	20.8804471087499	0	3.36800550173129	0	0	3.80078582408318	5.10323492930658	8.43067711640558	1.90213333287551	5.81298243819681	11.582424075441	0	0	0	0	7.5613117998981	1.29748789539362
ENSMUSG00000000142	Axin2	3.32889037891362	3.97414127090015	20.9430622449515	3.60170583922805	1.8322497952426	4.91038385520785	19.435768057765	3.93246592681155	8.91203517311476	23.958515784524	2.60192258635809	18.208951874994	2.34991014164902	10.7174356065391	13.0606138501934	5.11012239794836	10.3673554876469	4.21926885951676	5.17179538201294	11.6538450906191	20.1953716940819	16.2529369957205	23.2880747471894	4.75044692913834	7.52093748793363	11.4812502946541	0	11.1751444138225	1.39945014713963	8.9756878057598	21.9654427852057	4.04898722970254	33.6731000224372	13.847604167852	14.3905382713375	0	5.58363568549285	5.40172051126436	6.74305976785933	12.797425932263	12.6819045724509	0	5.11702351862504	25.0083548224395	23.1945841319629	13.7740296707027	37.4313866730587	15.8766177859559
ENSMUSG00000000148	Brat1	0	0	0.248826672537526	0	0	8.96283675550473	0	0	0	0	3.09137093607114	0	0	0	0	0	0.293275273468424	0	0	0	0	0	0	0	0	0	0	0	3.74107744464354	0	0	0	0	0	0	0	0	8.3080252268792	0	0	0	0	0	0	0	0	19.7679914130972	6.61183368788104
ENSMUSG00000000149	Gna12	0	0	31.7311916503106	0.464426050369781	4.33146140119686	33.4459387454431	0	0	10.4823167044242	1.24206645969901	24.1146276706101	0.11834546279335	11.2577312700965	3.45492976871218	15.9418717997966	6.79722034362512	2.12195306178149	0.209253236718603	0	3.28153843888349	2.12291995241602	0	15.8772296510154	1.66454286680555	0.484897913449211	1.27626108621427	0	11.6747011882413	10.5660383551618	6.72895499407895	9.77424490828153	57.3176380297566	12.1444511905355	20.0009834918387	0.10992916484731	13.391712317193	29.9995102306046	27.3126020496613	4.95482289027775	0	2.24191967929015	0	33.4034082403031	1.0607666835045	7.53190749916611	33.6489192155859	0.582363980490009	0.527636214837835
ENSMUSG00000000154	Slc22a18	0	0	0	0	10.6880878579696	0	0	0	0	0	0	0	34.2694076395748	0	0	0	0	0	0	24.7987893180092	0	22.8140561371038	0	0	0	21.8113695699339	0	0	0	0	0	0	12.6609603412938	0	0	0	0	0	0	0	0	0	0	0	0	0	0	11.8462974065494
ENSMUSG00000000157	Itgb2l	0	0	0	0	0	0	0	0	0	0	0	0	0	0	0	0	0	0	0	0	0	0	0	0	0	0	0	0	0	0	0	0	0	0	0	0	0	0	0	0	0	0	0	0	0	0	0	0
ENSMUSG00000000159	Igsf5	0	0	0	0	0	0	0	0	0	0	0	0	0	0	0	0	0	0	0	0	0	0	0	0	0	0	0	0	0	0	0	0	0	0	0	0	0	0	0	0	0	0	0	0	0	0	0	0
ENSMUSG00000000167	Pih1d2	0	0	0	0	11.7153691493704	0	0	0	0	0	0	0	0	27.6523900888491	0	0	0	0	0	0	6.58820455904815	0	0	21.291631530163	0	0	0	0	0	0	0	0	0	0	0	0	0	10.7178443137858	0	0.142323439839059	0	0	0	0	10.1442572281048	29.0667587335327	0	8.97037836416801
ENSMUSG00000000168	Dlat	3.32662790891197	16.6857731916077	0	28.7358628415044	7.5707491539544	6.87222267710783	34.3197053197228	68.6162937467927	0	29.6827677204027	11.4840143734295	57.338885371499	18.4631254560638	5.59952410026757	16.4802559795512	17.2197776256233	0.556328668060191	22.1640548668764	0	22.0723259327569	2.96843821426653	0	23.6124385912513	1.16374916762336	25.1546697519062	8.32799975264175	5.32627289312952	8.57036803560864	14.2762788606108	9.87941701709471	20.1210657678919	26.7815114854348	16.9813529541012	35.1613984113409	35.3537233881434	0	30.640087788039	5.00314678253577	7.93394507359014	25.483148808662	12.8159359249629	17.5013962360607	24.2186230603577	60.4424248371647	18.1911555957979	41.9575274843681	8.79453043774941	12.665284958266
ENSMUSG00000000171	Sdhd	408.475661754332	120.70127608841	207.955931437824	204.27049797564	446.641772385877	296.501821560889	673.33520597621	221.84936297981	262.512171308591	44.8072196119526	357.540424476472	636.122917503929	287.290990975737	236.851369502694	182.625067903205	346.619715503915	193.089684391716	742.100710295772	386.081942625776	152.293387041783	253.970131626665	249.363893733955	226.407178982806	409.865713205163	255.660553814034	68.1757729547345	71.1095388941541	595.874472507879	160.768813756621	760.601861290102	254.055201475218	443.307541964322	284.998947034985	192.247176754387	416.699939109462	460.290335344281	163.238531605387	302.836694952814	462.16171858449	224.407414317156	461.472710108374	568.518890181734	308.979264957691	609.326442815787	332.894180799419	202.633522678846	340.986174168698	288.44341677299
ENSMUSG00000000182	Fgf23	0	0	0	0	0	0	0	0	0	0	0	0	0	0	0	0	0	0	0	0	0	0	0	0	0	0	0	0	0	0	0	0	0	0	0	0	0	0	0	0	0	0	0	0	0	0	0	0
ENSMUSG00000000183	Fgf6	0	0	0	0	0	0	0	0	0	0	0	0	0	0	0	0	0	0	0	0	0	0	0	0	0	0	0	0	0	0	0	0	0	0	0	0	0	0	0	0	0	0	0	0	0	0	0	0
ENSMUSG00000000184	Ccnd2	80.6772130772524	35.3341991898574	34.1521417800361	74.8641564778454	77.8777500439579	29.9861544006991	100.482914219033	46.543983918713	49.8966246944764	80.3084009757005	74.6499151735948	59.5080582154731	95.6479833751325	51.6272973720678	34.5289416293888	66.9202794811763	36.9786799483673	78.6677413265107	78.7304292482952	88.7375926336418	41.1489629888196	62.4571810300903	26.5892390309605	74.4123489266683	220.303227357786	69.4260349237725	35.8935852089861	96.2459933987697	20.2147983020777	44.6253176829135	105.590701083732	78.2418458741199	37.0148659629421	116.65741577306	34.1234895510937	43.3724466855031	111.898546062522	54.1267562517045	88.1451880822883	87.3132294633273	2.46577105561909	92.3977245646537	21.7094168698303	23.6366415733343	90.984575138672	37.4680204651955	43.3010922718751	70.2074126977611
ENSMUSG00000000194	Gpr107	0	2.62637408156967	0	0.0621369022428	4.60980805839995	0	0.935567366844743	6.29190971026316	8.0338416047803	0	0.28055353596443	1.33003761850913	0	0.0210111376987182	0	0	3.07560745886184	7.69906355058184	0	2.75539529287808	0.820535704622441	5.90952771955729	2.57858198630313	0.0296938661705977	0	0	0	0	0.984797396928829	0	0	0	15.8873360814511	5.81736811163833	9.9424324898968	7.37974056188121	3.14117302934326	0.0319146889909	5.3033604866642	15.9941623450031	0	0	0	6.63490199836681	2.52845018042734	8.02931534108658	12.3419194972918	0
ENSMUSG00000000197	Nalcn	0	0	0	0	0	0	0	0.0474656262383663	0	0	0	0	0	0	0	0	0	0	0	0	0	0	0	0	0	0	0	0	0	0	0	0	0	0	0	0	0	0	0	0	0	0	0	0	0	0	0	0
ENSMUSG00000000202	Btbd17	0	0	6.27157205049322	0	0	3.69438082473612	11.2426605006024	0	0	0	0	0	0	0	0	0	0	6.05580311547856	0	0	4.80375123214481	0	0	0	0	0	0	0	0	0	0	0	0	0	0	0	12.4426284748494	0	0	0	0	0	0	17.7654288459531	0.440351359508539	0	0	0
ENSMUSG00000000204	Slfn4	0	0	0	0	0	0	0	0	0	0	0	0	0	0	0	0	0	0	0	0	0	0	0	0	0	0	0	0	0	0	0	0	0	0	0	0	0	0	0	0	0	0	0	0	0	0	0	0
ENSMUSG00000000214	Th	0	0	0	0	0	0	0	0	0	0	0	0	0	0	0	0	0	0	0	0	0	0	0	0	0	0	0	0	0	0	0	0	0	0	0	0	0	0	0	0	0	0	0	0	0	0	0	0
ENSMUSG00000000215	Ins2	0	0	0	0	0	0	0	0	0	0	0	0	0	0	0	0	0	0	0	0	0	0	0	0	0	0	0	0	0	0	0	0	0	0	0	0	0	0	0	0	0	0	0	0	0	0	0	0
ENSMUSG00000000216	Scnn1g	0	0	0	0	0	0	0	0	0	0	0	0	0	0	0	0	0	0	0	0	0	0	0	0	0	0	0	0	0	0	0	0	0	0	0	0	0	0	0	0	0	0	0	0	0	0	0	0
ENSMUSG00000000223	Drp2	0	0	0	0	0	0	0	0	0	0	0	0	0	0	0	0	0	0	0	0	0	0	0	0	0	0	0	0	0	0	0	0	0	0	0	0	0	0	0	0	0	0	0	0	0	0	0	0
ENSMUSG00000000244	Tspan32	0	0	0	0	0	0	0	0	0	0	0	0	0	0	0	0	0	0	0	0	0	0	0	0	0	0	0	0	0	0	0	0	0	0	0	0	0	0	0	0	0	0	0	0	0	0	0	0
ENSMUSG00000000247	Lhx2	0	0	0	0	0	0	0	0	0	0	0.543523247609366	0	0	0	0	0	0	0	0	0	0	0.829041839407645	0	0.69031986439126	0	0	0	0	0	0	0	0	0	0	0	0	0	0	0	0	0	0	0	0	0	0	0	0
ENSMUSG00000000248	Clec2g	0	0	0	0	0	0	0	0	0	0	0	0	0	0	0	0	0	0	0	0	0	0	0	0	0	0	0	0	0	0	0	0	0	0	0	0	0	0	0	0	0	0	0	0	0	0	0	0
ENSMUSG00000000253	Gmpr	0	0	0	10.5856351764869	0	0	0	0	0	0	0	0	0	0	0	0	0	0	0	0	0	0	13.360800221706	0	0	0	0	0	0	0	0	0	0	0	0	0	0	0	0	0	10.1812026862803	0	0	0	0	0	0	0
ENSMUSG00000000263	Glra1	0	0	0	0	0	0	0	0	0	0	0	0	0	0	0	0	0	0	0	0	0	0	0	0	0	0	0	0	0	0	0	0	0	0	0	0	0	0	0	0	0	0	0	0	0	0	0	0
ENSMUSG00000000266	Mid2	0	0	0	0	0	0	0	0	0	0	0	0	0	0	0	0	0	0	0	0	0	0	0	0	0	0	0	0	0	0	0	0	0	0	0	0	0	0	0	0	0	0	0	0	0	0	0	0
ENSMUSG00000000275	Trim25	12.6214505070227	0	0	0	0	0	0	0	0	0	0	0	0	0	15.6524535769667	0	0	0	0	0	0	0.0452105467068596	0	0	0	0	12.8488528512926	8.61420079332589	0.704806954443665	0	0	0	0	10.8415359581277	3.71993874621991	0	0	0	1.89777377792602	0	0	4.69303671639278	24.9720352132608	0	1.30079924250141	0	0	0
ENSMUSG00000000276	Dgke	0	0	0	0	0	0	0	0	0	0.0919799912490503	0	0	6.1279379108822	0	0.943438491150621	0	0	0	9.75534688353387	0	0	0	0	0	0	0	0	4.61921168749969	0	0	0	0	0	9.91728435325575	0	0	0.0531248292895036	0	0	0	0	0	0	0	0	0	0	3.1519348847417
ENSMUSG00000000278	Scpep1	22.9232505489016	0	0	63.5499611813573	37.8454093138605	0	22.0985205817564	20.3175288964956	40.686375100387	9.93265476316461	14.8021312101685	48.3887903321045	0.171390415407189	25.4541767231786	35.4024704965694	8.07650644347416	35.7186999571472	7.32875284576112	30.4101026574836	42.0275212544608	0	61.282734363914	22.724359065541	0	69.8267794349439	0	38.0767206727919	0	0	12.2402590001974	0	0	47.8705456490246	1.8887813400267	66.9736490902648	0	39.0952129509758	14.9602121190524	65.6124740148534	101.377658110597	0	1.43081297441446	66.5059327100954	32.6156668823651	48.8546419365861	0	7.20987158602261	8.45190854262252
ENSMUSG00000000282	Mnt	0	0	0	0	0	0	0	0	0	0	0	0	4.89357232977287	0	0	0	0	0	0	0	10.7098795784014	0	0	0	0	0	0	0	0	5.63019774391114	0	0	0	0.321005062948671	0	0	0	0	0	0	2.33668802027643	0	0	5.57985742593819	7.4815635706199	0	0	0
ENSMUSG00000000290	Itgb2	0	0	0	0	0	0	0	0	0	0	0	0	0	0	0	0	0	0	0	0	0	0	0	0	0	0	0	0	0	0	0	0	0	0	0	0	0	0	0	0	0	0	0	0	0	0	0	0
ENSMUSG00000000295	Hddc2	20.2094320119574	12.0728409741289	31.1181586893574	0	22.239654413194	10.1932864400058	0	10.9507177751898	9.1992706334335	12.3148308010045	20.305866362024	0.806692333613052	10.7575822737833	40.9835537485589	0	20.7913151561166	0	7.84496826689959	0	10.1373771110839	5.74234650754873	0	22.7890951226371	8.5366817979402	0	8.38883355927272	0	7.06472510900758	0	9.17347615840455	0	6.35510937478397	17.0819329934531	12.8431612305187	44.9593989138347	5.55189789349338	46.2323521503388	33.1002086951202	0	3.53792215629575	10.3377323893058	50.4630768624515	16.4644753596854	13.5574327978689	9.86807144847727	15.7076282896253	0	8.0495106009734
ENSMUSG00000000296	Tpd52l1	0	0	42.1272678369916	50.9640015061865	27.1971607172794	53.3967877026486	0	0	1.00242417240036	0	80.0110315841463	0	0	59.6062630804082	72.4734087771879	0	0.684863157506196	0	0	0	53.5959285341292	0	0	0	49.0788525138519	40.3676654676663	0	35.0964637686117	0	0	32.5279515442681	36.9986869821709	21.2918590341611	94.6783768820019	0	0	17.1757030278189	29.8715216982687	3.71421439394092	0	20.7710753230966	48.7595754784301	48.9803193009553	0	0	0	0	0
ENSMUSG00000000301	Pemt	0	13.0838840252894	0	0	0	0	0	0	0	0	0	0	0	0	0	0	0	0	0	0.918589821294905	0	0	0	0	48.4956912434877	17.9582390103306	0	0	0	0	28.035606656441	0	0	19.5309102312849	0	0	0	0	17.6460489932669	0	0	0	0	8.18060846318631	0	0	0	30.2685302357289
ENSMUSG00000000303	Cdh1	111.596359856847	19.135655301772	0.084034762221763	30.3491356483444	63.0063462929832	5.43423801390094	35.0940114536689	24.2795395114806	0	0	136.506980628462	88.4723150421919	49.3456012891065	0	0	83.8496457988325	15.5832571011401	49.6178127416402	0.0876845408320243	0	2.73051463927813	0	0	19.7243356224435	55.261993913307	40.5088728676406	0	25.721097248392	0	0	0	54.5677254171604	33.815944308395	70.4652432223829	89.4872430168489	29.4098553486405	15.2935280040266	90.587911957152	0	0	0	34.9304959534836	52.6651802076625	79.8153876974804	11.1478338667945	0	0	56.7438488464342
ENSMUSG00000000305	Cdh4	0	0	0	0	0	0	0	0	0	0	0.0548366548791499	0	0	3.28955606499979	0	0	0	0	0	0	8.49402008245165	0	0.0432005585899273	0	0	0	10.2692238805	0	0	0	0	0	0	0.40934006511327	0	8.05128475005158	8.10440244028398	0.842130879821889	0	16.5504686344471	3.47632117444	0.103362781016505	0	0	2.4495517773479	0	0	0.538130288652762
ENSMUSG00000000308	Ckmt1	0	0	24.6394232309195	0	0	0	0	0	0	0	0	0	0	0	0	0	0	4.43891842058357	13.176147981084	0	0	0	0	0	0	0	0	0	0	8.74871985047476	0	0	0	0	0	0	0	0	0	0	0	0	0	0	0	0	0	0
ENSMUSG00000000317	Bcl6b	0	0	0	0	0	0	0	0	0	0	0	0	0	0	0	0	0	0	0	0	0	0	0	0	0	0	0	0	0	0	0	0	0	0	0	0	0	0.219103479245942	0	0	0	0	0	0	0	0	0	0
ENSMUSG00000000318	Clec10a	0	0	0	0	0	0	0	0	0	0	0	0	0	0	0	0	0	0	0	0	0	0	0	0	0	0	0	0	0	0	0	0	0	0	0	0	0	0	0	0	0	0	0	0	0	0	0	0
ENSMUSG00000000320	Alox12	0	0	0	0	0	0	0	0	0	0	0	0	0	0	0	0	0	0	0	0	0	0	0	0	0	0	0	0	0	0	0	0	0	0	0	0	0	0	0	0	0	0	0	0	0	0	0	0
ENSMUSG00000000325	Arvcf	0	7.80015137676874	0.119649806195282	13.2103731146116	0	0	0	0	0	7.08400544898698	0	0	2.01379069882015	0	0	0	0	1.89132357396462	13.0464497682532	0	0	16.9648688762307	0	0	0.670298724994632	0	0	3.3252456302695	8.14247842563551	6.49931522260787	0	27.0044089996742	0.0797145511204673	4.4693564058772	10.5203493978698	0	11.1649539087038	20.7357657164374	0	0	0	0	0	0	20.2409929756437	0	3.46782568130169	0
ENSMUSG00000000326	Comt	27.1799846108184	0.557550370421858	52.5251780534009	39.4740132101026	5.44527464819427	19.2892029299721	22.2642567868328	13.2408851203329	1.22214984999996	35.4945954737654	11.473270586664	1.11764482871824	42.0158323571196	0	0	5.28643216242611	0	17.7855333995802	0.633600457765686	1.67929248215239	18.7757494685683	16.2331574836891	0.123817714726344	32.337886822793	65.9424392780902	6.16993939020018	15.8843486661326	27.4512247212928	6.40672861906611	13.3147558113486	0	14.3556329118214	5.86604018069553	11.7321518662204	35.4458169357425	7.33420010126534	34.1383258257137	5.47092388166122	0	120.328116666428	0.177920212444363	25.7737053948656	52.8546898081991	22.718924360097	4.98838785338998	0	0	26.4571079584378
ENSMUSG00000000339	Rtca	39.3654985069034	6.19503706794798	0	0	8.76471633435608	0	34.8138949298761	15.9753391884017	11.9922989688598	14.1566747010104	0.211675321520208	16.7728254629588	0	20.5451374872896	13.2454660967614	16.7097624517503	7.38996490062271	14.8284857492549	17.7067736439103	14.3925434979057	0	35.285148333284	24.0132602824164	10.4849673232767	47.9301985188469	11.5949677407127	16.3594875060832	3.78806793873786	12.0800912813115	7.94732535577282	5.52533674342383	53.8782175130563	5.4485743717979	8.16383035712207	0	57.3392102779465	2.3699890598461	7.36828684487565	59.5360908305371	0	42.173904314897	15.1616705690413	0	0	0	0	0	11.1851393343992
ENSMUSG00000000340	Dbt	2.16917043660122	24.8779374959918	12.5140009742699	6.63402372547323	1.9083928721576	0	27.3971681838337	0	0	0	0	0	35.2105943738682	8.65252206005925	6.95113731224986	3.7532082926273	19.7560928580618	19.8558071286319	0	0	0	0	0	0	57.6874415636607	0	0	0.595591088097853	0	0	19.9455320231121	66.2986692154168	0	0	0	0	0	0	3.91390333985172	0	2.62384485341337	35.8472497890934	0	73.1913169821756	0	0	0	8.70337092089537
ENSMUSG00000000346	Dazap2	54.3551820904301	27.8323282391529	5.05202631854121	105.99697992536	57.0900672783459	177.677372443205	148.606381312585	0.765012804049902	0	72.2429287566206	118.556727724615	44.7218819179742	0	0	91.5092483240646	135.088152429112	0	0	117.070002653399	0	71.2657278221176	40.7450519851387	27.4704450109181	45.8789095908987	74.0214456862805	49.5421348921359	0	35.4128340314517	0	21.19018926832	53.8398287743262	8.22783744808095	84.987018213334	0	36.8114604897017	65.4840834195845	64.174008255767	76.9774957732483	83.4233707221791	72.1342114632712	135.814312617182	114.610587520516	275.417205454468	65.7344217261509	0.256188350265373	0	62.3171557725309	2.63220928789491
ENSMUSG00000000355	Mcts1	0	0	177.874364574477	80.788256553185	45.8075666823178	0	0	0	79.6343373571495	67.0280327636471	0	67.9355688339593	0	15.5370876711821	0.592550164771802	121.717252298472	71.9014767792024	67.1128808739881	0	65.4489692864662	50.2642101018748	80.1454354574251	52.4838939017873	48.0173820568022	0	3.46889550485993	70.7792349820062	155.577469329134	0	18.2893939049759	20.3086397353088	34.5514772218626	0	47.9024283454386	135.052632286379	0	0	17.3757706028483	65.3380197268945	0	11.1834914948797	51.0891763822631	0	0.28831787005501	20.2485010030241	0	0	0.382432698893707
ENSMUSG00000000359	Rem1	0	0	0	0	0	0	0	0	0	0	0	0	0	0	0	0	0	0	0	0	0	0	0	0	0	0	0	0	0	0	0	0	0	0	0	0	0	0	0	0	0	0	0	0	0	0	0	0
ENSMUSG00000000365	Rnf17	0	0	0	0	0	0	0	0	0	0	0	0	0	0	0	0	0	0	0	0	0	0	0	0	0	0	0	0	0	0	0	1.47544899454554	0	0	0	0	0	0	0	0	0	0	0	0	15.066140914036	0	0	0
ENSMUSG00000000374	Trappc10	0	0	0	0	0	0	0	3.52321903223425	9.57236153605144	0	0	0	0	0	0	0	0	0	0	0	0	0	0	0	0	0	9.75091349119019	2.55843722397827	0	0	0	0	0	1.70555003015822	0	4.90378675870084	0	0	0	2.75835713963673	0	0	3.98627967735998	0	0	4.66534248073876	0	0
ENSMUSG00000000378	Ccm2	15.7537461074835	0	4.29879298922425	0	16.3277813450066	2.02216421878097	19.8080180772644	21.148033988224	36.7787952287807	8.10155296899147	37.993006426704	0	40.7836256577446	0	0	12.741892438124	9.47431397515732	0	0.875218962936562	48.7132241467578	23.0784060293562	0	33.0096811574527	21.7144293677329	35.6042575724466	29.4333796495013	20.1670210873807	1.0101514503301	24.779674423203	7.94210028979269	12.6495804565564	24.8536495950303	0	80.8955233071319	3.8924399974085	15.5672064103022	0.121537900504928	13.4474013307685	0.297866620790679	0	0	83.6858739910645	74.5474673997354	48.1858908357895	0.127604999341127	0	40.8072893816179	29.6631533996521
ENSMUSG00000000381	Wap	0	0	0	0	0	0	0	0	0	0	0	0	0	0	0	0	0	0	0	0	0	0	0	0	0	0	0	0	0	0	0	0	0	0	0	0	0	0	0	0	0	0	0	0	0	0	0	0
ENSMUSG00000000384	Tbrg4	63.7198846295292	11.2677671451002	0.519987827925249	25.5399143911685	19.1067563875109	14.8661511217601	52.2202923601359	6.99212595606324	15.0705361373372	26.1945999510352	12.2744196180224	37.8454445108552	6.32071714612468	25.980976683587	4.65951886197112	5.98664273045485	15.0358593216133	4.83501796963438	14.4324104271741	2.09168071861957	0	4.92692207862255	29.0095257470208	1.12819016527932	5.28832603182942	16.8089386241175	23.6839400375281	12.023426028929	7.79051959758356	15.9625765692873	0	19.2756998279638	45.3133871862348	14.1992050129808	10.5665245725959	11.1517244333541	81.2516379197021	37.3691476634211	1.62496879734915	46.0365883153657	0.975095190279495	11.9740580109226	0	33.0886880252256	71.891330862564	31.7409908064548	34.1247645173797	36.2496738911064
ENSMUSG00000000385	Tmprss2	0	0	0	0	0	0	0	0	0	0	0	0	0	0	0	0	0	0	0	0	0	0	0	0	0	0	0	0	0	0	0	0	0	0	0.237744873136062	0	0	0	0	0	0	0	0	0	0	0	0	0
ENSMUSG00000000386	Mx1	0	0	0	0	0	0	0	0	0	0	0	0	0	0	0	0	0	0	0	0	0	0	0	0	0	0	0	0	0	0	0	0	0	0	0	0	0	0	0	0	0	0	0	0	0	0	0	0
ENSMUSG00000000392	Fap	0	0	0	0	0	0	0	0	0	0	0	0	0	0	0	0	0	0	0	0	0	0	0	0	0	0	0	0	0	0	0	0	0	0	0	0	0	0	0	0	0	0	0	0	0	0	0	0
ENSMUSG00000000394	Gcg	0	0	0	0	0	0	0	0	0	0	0	0	0	0	0	0	0	0	0	0	0	0	0	0	0	0	0	0	0	0	0	0	0	0	0	0	0	0	0	0	0	0	0	0	0	0	0	0
ENSMUSG00000000399	Ndufa9	31.274284312023	29.2288019509778	172.337578421232	47.1941750375765	44.9759040409682	35.9070735646004	15.6896384075137	34.9062124989262	35.1382832102661	35.0652812093539	28.4114424886714	0	32.1600532167865	37.4064054600277	9.52606884360532	71.1199690204743	62.963730498611	18.3720557154024	0.381788757511356	54.4581668981748	65.0058769627324	33.8022968158481	31.186505864162	53.4056549633602	79.3122198941722	20.7506324155543	0.281512800785674	42.9802373873435	47.8702468127308	33.3686988540265	45.5566963695909	0.461348088627407	97.2652215081637	57.0268575528743	93.6560905331017	80.8421424890754	88.0088274389304	51.776258709491	27.8062247512122	52.5931512659532	106.780581151235	79.9729791582287	28.1609215309157	118.357024391802	93.2927985044909	33.8409421258728	129.341238369604	77.9240753520461
ENSMUSG00000000402	Egfl6	0	0	0	0	0	0	0	0	0	0	0	0	0	0	0	0	0	0	0	0	0	0	0	0	0	0	0	0	0	0	0	0	0	0	0	0	0	0	0	0	0	0	0	0	0	0	0	0
ENSMUSG00000000409	Lck	0	13.7364116867129	0	0	15.4993694696914	0	0	0	0	0	25.9502814788242	0	0	30.6781978810909	0	0	21.4479780511193	0	0	0	0	35.9704000441326	0	0	0	4.4653887372905	0	0	0	12.8180198330364	0	0	36.5458149908984	0	0	2.93810172848198	38.7904662099768	13.6317671992036	0	0	0	40.7191835411567	0	0	37.53259917459	0	0	8.30743314559972
ENSMUSG00000000411	Tssk3	0	0	0	0	0	0	0	0	0	0	0	0	0	0	0	0	0	0	0	0	0	0	0	0	0	0	0	0	0	0	0	0	0	0	0	0	0	0	0	0	0	0	0	0	0	0	0	0
ENSMUSG00000000416	Cttnbp2	0	0	0	0	0	0	0	0	0	0	0	0	0	0	0	0	0	0	0	0	0	0	0	0	0	0	0	0	0	0	0	0	0	0.168228613236323	0	0	0	0	0	0	0	0	0	0	0	0	0	0
ENSMUSG00000000420	Galnt1	41.6071067121886	0	0.069645769596366	0	33.2074664375802	8.77046349926634	1.55812396515687	35.8150468015238	0	48.8524999490346	0	0	21.4901035270753	30.3755417491661	4.3432831949728	37.7654295458198	39.3469333427989	4.40360716170419	67.2929837149881	28.2955624402178	35.6236490511277	22.8607756095971	12.6675012089552	54.8792253182726	0.24010310162602	39.6289203666997	77.6965638660551	15.3812442978692	13.3736832268188	19.0891475552267	57.1369562031895	30.8227585890895	18.0032981054732	0.0897077022566588	0	62.5355792105309	0.96877972803276	18.9722214807143	39.1759101830203	0.072541372760876	20.5289428237263	0	33.6928044677345	0	43.9913322008321	40.6879742028264	26.0249061063507	60.7442267872448
ENSMUSG00000000435	Myf5	0	0	0	0	0	0	0.688052981573115	0	0	0	0	0	0	16.7401170917133	0	0	0	0	0	0	0	0	0	0	0	0	0	0	0	0	0	0	0	0	0	0	0	0	0	8.84127146821633	0	0	0	0	0	0	0	0
ENSMUSG00000000439	Mkrn2	0	0	0	4.75604099205233	0	0	15.0039095567783	0	0	10.4620182337687	8.46459544100508	0.173134090322092	0	0	0	0	0	0.765320189112149	9.38976883962476	0	0	13.332019041357	6.57893628722399	7.14311066530597	9.26928220925427	9.85420527476222	0	4.02589695793228	0.057893778956015	0	0.0529602991620108	0	0	0	0.536071416300371	0	14.9473399948609	0.465293841150984	0	0	0.096465519894888	0	0	0	0	0.422911131373178	0	4.20261052507333
ENSMUSG00000000440	Pparg	0	0	0	0	0	0	0	0	0	0	0	0	0	0	0	0	0	0	0	0	0	0	0	0	0	0	0	0	0	0	0	0	0	0	0	0	0	0	0	0	0	0	0	0	0	0	0	0
ENSMUSG00000000441	Raf1	4.54704119069657	10.7760761659168	0	5.91018617905199	1.57208549268753	0	12.4232849374137	0	12.7228056721148	0	9.767061146668	0	6.56328891725483	4.38883222681165	0	16.5617005937124	2.470910231961	0	2.05075502436797	36.4801340443212	14.7145007658736	0	1.83203186961053	0	0	5.46688471709666	0	2.82989981176478	12.1456411870433	4.19760961646707	6.82897718763559	15.8598599607147	0	10.921784970333	11.7400814906267	43.7381698155426	14.7108977611017	5.5354757528383	11.8051787223636	5.55643600370943	11.0895887914811	23.3414300206332	17.4931934035917	11.1168968309538	14.5568129401773	10.6467954553134	0	18.0811051296092
ENSMUSG00000000486	Sept1	0	0	0	0	0	0	0	0	0	0	2.73653365352943	0	0	0	0	0	0	0	4.49987035205793	5.03638562607031	1.31232257644827	0	0	0	0	0	6.85004293247283	1.23718874698409	0	1.10923441958131	8.05617580086614	0	0	0	0	6.55709847246413	0	0	0	13.6205025729728	0	0.542963229704509	8.15760593370959	0	0	0	0	0
ENSMUSG00000000489	Pdgfb	0	0	0	0	0	0	0	0	0	0	0	0	0	0	0	0	0	0	0	0	0	0	0	0	0	0	0	0	0	0	0	0	0	0	0	0	0	0	0	0	0	0	0	0	0	0	0	0
ENSMUSG00000000530	Acvrl1	0	0	0	0	0	0	0	0	0	0	0	0	0	0	0	0	0	0	0	0	0	0	0	0	0	0	0	0	0	0	0	0	0	0	0	0	0	0	0	0	0	0	0	0	0	0	0	0
ENSMUSG00000000531	Grasp	0	0	0	0	0	0	1.89861150603318	0	0	0	0	0	0	0	0	5.56378535078905	0	0	2.78935283493269	0	0	0	0	0	51.6754236975207	0	0	0	8.46146483191712	11.6091465958453	0	0	0	0	0	0	0	0	9.76434305650043	0	0	33.9093079320153	0	0	5.34495694706664	0	0	0
ENSMUSG00000000532	Acvr1b	0	0	0	0	0	0	9.85138657120089	0	0	0	0	4.21398881520414	0	0	0	0	0	7.20802243826609	0.0908835462872602	6.39420112541704	3.56048905683551	0	0	1.28848366938766	0	2.88144450992859	0	0	0	10.3306409884171	0	23.9412790456546	0	17.9504847950872	12.3385710247381	0	0	4.80081391846978	0	0	0	19.0373021993472	0	0	0	0	0	12.1848534809881
ENSMUSG00000000538	Tom1l2	0	0	0	0	0	0	0	0	0	0	0	0	0	0	0	0	0	0	0	0	4.64299248378953	0	0	0	0	0	0	0.617570911783279	0	0	0	0	0	0	0	0	0	0	0	0	0.642534769952543	1.62619469818562	0	0	0	0	0	0.445596931167628
ENSMUSG00000000544	Gpa33	0	0	0	0	0	0	0	0	0	0	0	0	0	0	0	0	0	0	0	0	0.440791062329998	0	0	0	0	0	0	0	0	0	0	0	0	0	0	0	0	0	0	0	0	0	0	0	0	0	0	0.109555392042672
ENSMUSG00000000552	Zfp385a	0	0.462151092724185	0	0	0	0	0.834112824453251	0	0	0	0	0	0	0	0	0	0	0	1.22544025681351	0	0	0	0	0	0	0	0	0	0	0	1.45739068558227	0	0	0	0	0.790801531183692	0.388963721738164	0	0	0.524254696116029	0	0.982239679402155	1.22978312935615	0	1.63352222639746	0	0	0
ENSMUSG00000000555	Itga5	0	0	0	0	3.5581064573951	9.3262061667353	0	9.90607192168985	0	0	0	0	0	0	0	0.0614966885447027	3.33165420318581	0	15.349334817687	0	0	17.8620335781489	8.18702130295	0	36.7677063153919	0	0.133151372006011	0	0	1.63866161989982	33.824784495746	0	0	0	0	0	0	0	0	0	0	23.8101355153052	32.6649723529446	0	26.2229135453756	0	21.407290878324	0
ENSMUSG00000000560	Gabra2	0	0	0	0	0	0	0	0	0	0	0	0	0	0	0	0	0	0	0	0	0	0	0	0	0	0	0	0	0	0	0	0	0	0	0	0	0	0	0	0	0	0	0	0	0	0	0	0
ENSMUSG00000000561	Wdr77	53.2207538111661	63.7912025237362	61.852536019712	145.014899652541	72.9380000085111	126.291142380932	67.6984818138899	85.9905365209969	22.4641579770761	11.9516037999244	49.0757929893453	112.319891698679	46.6982412719442	23.2711913286452	179.843167291477	209.235286352351	96.2660687350007	142.932279863368	103.063405839394	44.9542412722381	73.7356673082177	113.224150067739	51.6790229378863	5.637921189514	61.3156166089189	107.169022224839	80.2702262247698	215.897806092881	74.9769881884449	67.6620680028455	43.3750429511496	101.914851913023	44.5407730199401	77.8286865238947	41.5001331353748	29.2847724842902	40.1287467997243	71.6209263847993	167.484906243614	73.0250368568484	23.1714522824566	26.9609675933897	25.025743735233	39.3907961978007	20.3895444578278	87.8772814395052	63.859909632884	48.5258194701813
ENSMUSG00000000562	Adora3	0	0	0	0	0	0	0	0	0	0	0	0	0	0	0	0	0	0	0	0	0	0	0	0	0	0	0	0	0	0	0	0	0	0	0	0	0	0	0	0	0	0	0	0	0	0	0	0
ENSMUSG00000000563	Atp5f1	110.277348783235	228.694802121539	261.431183119938	202.12636296152	72.8262979638371	82.3281775480341	154.784823355286	60.0621709146014	203.427150887685	200.704956710104	156.950160686355	137.677662621465	147.43951295185	208.701783009673	186.972961425624	131.293797122343	277.671385721052	146.966831619087	129.162810394696	128.6278166212	174.991582026512	180.736545033526	116.314331051268	179.793661535787	141.793647040476	186.389459506491	165.262552602912	94.7229227224273	76.465905799817	147.641195416005	104.201678602012	128.097707991925	116.282266398166	98.5369288069248	123.67853170867	154.140173702482	99.5314577250252	113.244714087597	93.1041805448285	144.342664476386	95.421318828742	59.752475152406	13.7268362940558	84.0793907134209	61.5376275019899	104.35478975004	109.620507145785	81.5948810606146
ENSMUSG00000000567	Sox9	0	5.88926905173289	4.09008466885203	2.30202571423918	0	1.89826548785716	0	0	0	0	0	13.3941305498393	0	5.70836280044538	1.80100857819879	0	23.5192111468428	0	2.23085588019604	8.60022222628354	15.8814834457189	0	0	0	6.32921356783834	0	0	0	9.02302896880131	0	2.24296793004768	5.50867469258652	6.68850387212724	1.07759885823229	0	0	0	3.94121324941069	0	0	0	0	0	0.109539872758506	0	0	7.69762653389648	0
ENSMUSG00000000568	Hnrnpd	38.0908991777077	5.90295271834042	199.923087325124	55.2269136992347	74.7642129190937	141.009439232346	55.3485012802789	96.2111268790901	91.6719222931126	33.0960180682792	41.5049424285122	85.6472261633732	83.9134605390179	82.1389543183106	114.937972320057	19.5756988172022	156.720978214339	122.034643812878	127.781462785013	38.0550503241568	34.5688322738414	157.9101974971	33.5503914946627	103.195802945169	78.2932496962543	97.718953039896	125.787452940018	105.438712792927	43.8413118930614	83.6635234276053	23.962302886075	66.3637055035099	17.4111364886117	39.5862011895085	45.3440315584917	94.417202545378	61.9200731578176	44.8752467939682	91.4684639108345	21.1229350655021	68.2111836282041	37.2297866698972	65.3212336096028	21.741966680897	10.4323073325904	40.7675059147721	36.5734082559482	127.611145591605
ENSMUSG00000000579	Dynlt1c	0.0915614889839615	0.186883444255778	0.61060365750968	3.15027678328668	0.445166683108542	0.115455061222742	0	3.32862600523063	0.351127132667639	2.04245747049453	0.421445172844046	0.214068361610847	0.380625577028196	0.213048597189704	0.0616161178750662	0.289296574546539	0.399820826661679	0	0.212374418726862	2.5585292348484	0.746672284031594	0.413250970216474	1.24506137286379	0.100363223599113	0.350841678018004	2.78950507997376	0.46978426882502	0.226261087365439	0.214744994221279	0.30429057796894	1.08044899442117	0.256630218217151	4.33924059051313	0.262164050174477	0.0994223000048742	0.479673367207265	0	0.107869451855396	1.30100758358058	2.22596572984187	0.596364810576022	0.198597750022976	0.37297235231069	3.59767572562686	2.60095273478316	3.9217533429562	0.210681001573087	1.03394532823751
ENSMUSG00000000581	C1d	125.346326196803	76.3281572435943	39.0628913580354	92.9252007025737	107.238882208592	64.1830724776267	78.3275265919068	130.075538781623	59.97532679236	88.7296439913287	72.4178629389134	93.0980357521695	78.8983228717104	93.6616561920556	37.7484861163337	62.6338308165862	69.4014095015002	127.574182072021	72.4835751716697	137.878147795063	202.298713423042	120.856720288951	74.4724967582128	101.054209948323	84.5827032685534	23.3718173283384	79.5026677897438	82.2857487304187	55.7308412894117	92.5389920762687	80.2334612826586	132.716622480796	41.2809634757394	18.7132961506707	115.804307737142	56.4605570309784	53.7569283221563	84.8500298261113	113.161281394972	132.683636349905	56.7769005950552	8.26146755464788	48.3089288437582	81.5191894374886	34.6605202916228	43.3065232930454	173.190936993161	110.83627145482
ENSMUSG00000000594	Gm2a	0.0837964002647014	2.39448092206373	0	13.8389285123029	3.58523676920002	0.105663621574581	6.71403221999631	0.16924077782834	1.07116321790297	0.934621015999255	12.7282160863714	3.82031885999062	5.660618020857	2.92470760207964	0	2.18428727574844	0.0731826150860752	0	0	0	0	0	1.97508306175543	12.1244221493744	10.5156228096374	0	0	1.58755568375115	0.0982665184363666	0	0	0	24.6961551245097	0	0	0	19.6490297241808	2.46803319395342	5.42417498237992	0.097008925676587	0	10.3600462817292	0	0	0	0	15.1358755078535	0
ENSMUSG00000000600	Krit1	0	3.74683646175227	8.56590061638866	1.88754240102697	0	28.6152830634566	0	3.35596725668072	1.51719120954294	0	0	0	2.45053079509551	10.6785576332676	4.03617010315075	0	0.221131855551353	2.30604669804913	1.1745948723289	0	0.663697849947662	0	1.30549980714439	4.40599741296838	0.0151595778368417	3.99003145610027	0	3.02421399745555	14.6793037100273	16.6893767196758	0	1.37500857366914	0	0.0453115644309248	0.360860228320441	4.26961537816339	0.387388501430937	7.1778622645982	7.67028698046766	3.26103230016816	0.0309221144402915	0	3.0942385752308	0.165816088905476	8.96939411787559	0	6.11745206672677	5.86972854467991
ENSMUSG00000000605	Clcn4	0	7.12032460810814	0	4.25527999130646	2.03924238435569	0	0	0	0	0	0	20.4137711592539	0	10.791687863829	8.00625105284746	0	0	0	0.467719055120326	0	0.234917219224267	0	0.511847271325881	0	0	0.127105185729095	0	15.5802461245199	4.68210451744625	14.2518351270511	0.0865275558320433	0	27.8928883700506	0	25.7498075738338	0	0	0	31.8997956233897	0	0	0	1.64281816288918	0	15.0568839665705	30.8168313462396	0	0
ENSMUSG00000000606	Vmn2r88	0	0	0	0	0	0	0	0	0	0	0	0	0	0	0	0	0	0	0	0	0	0	0	0	0	0	0	0	0	0	0	0	0	0	0	0	0	0	0	0	0	0	0	0	0	0	0	0
ENSMUSG00000000617	Grm6	0	0	0	0	0	0	0	0	0	0	0	0	0	0	0	0	0	0	0	0	0	0	0	0	0	0	0	0	0	0	0	0	0	0	0	0	0	0	0	0	0	0	0	0	0	0	0	0
ENSMUSG00000000627	Sema4f	0	0	0	0	0	0	0	0	0	0	0	0	0	0	4.26734130241402	0	0	0	0	0	0	0	0	0	0	0	0	0	0	0	0	0	0	0	0	0	0	0	0	0	0	0	0	0	0	0	0	0
ENSMUSG00000000628	Hk2	52.0276954289488	18.092878480478	9.85246697395855	53.1572922788799	35.549002133882	7.59786759738363	33.1351284578854	7.37188330979164	26.6618967348435	16.9304976453942	26.8677652197303	71.7916212022464	13.7885584777906	17.4355060040866	0.233932729650654	29.929981906045	21.9093105235853	25.0284960354877	31.9162033236217	21.9530809709338	22.3411431145826	0.0871641768307155	33.3517503922449	40.0727703269995	56.2219674613153	15.1556271256559	13.3769280031571	33.8360966118443	25.9538519092294	16.3022058579955	19.702269377563	57.2416732798926	18.8769505794573	37.9057198192003	43.0313839083586	32.0975133296782	42.0253178171135	24.8453581429804	11.2509148026212	8.58528179631615	1.84907060793661	61.9536145092196	74.1057135950288	38.8522458392507	10.6585341181943	53.0062315896702	11.6648412644305	63.0595256962979
ENSMUSG00000000631	Myo18a	0	0	0	0	0	2.20253009074653	3.0087641167778	1.74211308872622	0	0	0.0744434004722811	3.6300184903598	0	1.60565602361641	0	0	0	0.0222862460756609	0	0	0.90439540530687	0	0.11729367850113	1.11095461059369	0	0	0	0.79932792322061	0	1.24220836555905	0	5.59079259924373	6.8663520642287	0.123488634720833	0	0	0	1.06701768570361	0.851140356533821	0	1.34836384234196	0	0	0	2.12941290226811	0.0369457189657556	3.29967278827792	0
ENSMUSG00000000632	Sez6	0	0	0	0	0.174569430223322	0	0	0	0	0	0	0	0	0	0	0	0	0	0	0	0	0	0	0	0	0	0	0	0	0	0	0	0	0	0	0	0	0	0	0	0	0	0	0	0	0	0	0
ENSMUSG00000000673	Haao	0	0	0	0	0	0	0	0	0	0	0	0	0	0	0	0	0	0	0	0	0	0	0	0	0	0	0	0	0	0	0	0	0	0	0	0	0	0	0	0	0	0	0	0	0	0	0	0
ENSMUSG00000000682	Cd52	0	0	0	0	0	0	0	0	0	0	0	0	0	0	0	0	0	0	0	0	0	0	0	0	0	0	0	0	0	0	0	0	0	0	0	0	0	0	0	0	0	0	0	0	0	0	0	0
ENSMUSG00000000686	Abhd15	0	0	0	0	0	0	0	0	0	0	0	0	0	0	0	9.27062073248885	0	0	0	0	0	0	0	0	0	0	0	0	0	0	0	0	0	0	0	0	0	0	0	0	0	0	0	0	0	0	0	0
ENSMUSG00000000690	Hoxb6	0	0	0	0	0	0	0	0	0	0	0	0	0	0	0	0	0	0	0	0	0	0	0	0	0	0	0	0	0	0	0	0	0	0	0	0	0	1.2446728706451	0	0	0	0	0	0	0	0	0	0
ENSMUSG00000000693	Loxl3	0	0	0	0	0	0	0	0	0	14.5806969877696	0	0	0	0	0	0	0	0	0	0	0	0	0	0	0	0	0	0	0	0	0	0	0	0	0	0	0	0	0	0	0	0	0	0	0	0	0	0
ENSMUSG00000000701	Tcl1b5	0	0	0	0	0	0	0	0	0	0	0	0	0	0	0	0	0	0	0	0	0	0	0	0	0	0	0	0	0	0	0	0	0	0	0	0	0	0	0	0	0	0	0	0	0	0	0	0
ENSMUSG00000000706	Btn1a1	0	0	0	0	0	0	0	0	0	0	0	0	0	0	0	0	0	0	0	0	0	0	0	0	0	0	0	0	0	0	0	0	0	0	0	0	0	0	0	0.097197338253769	0	0	0	0	0	0	0	0
ENSMUSG00000000708	Kat2b	0	0	0	0	0	0	2.06133152338557	0	0	0	0	0	0	0	0	0	0	0	0	0	0	0	0	0	0	0	0	0	0	0	0	0	0	0	0	0	0	0	0	0	0	0	0	0	0	0	0	0
ENSMUSG00000000711	Rab5b	12.2657305022545	0	0	0	0	4.46350201100851	2.50184209581604	0	0	0.550894682175043	0	11.1628421101266	0	0.638486512406181	27.2000766275019	4.8768440344365	0.71893514034809	0	1.81392828030181	4.04852993554854	0	0	12.4626464569736	0	0	0	1.40789905844014	0.067808309686524	0	0	8.56599116307996	0	1.46298307340824	0.707112795174244	0.446938856365639	10.8893333195742	0	0	11.4370572244751	4.09790548904851	2.35916865365408	0	15.4251279302937	0	8.68564493015867	0	21.120030692212	0.357534973793153
ENSMUSG00000000724	Cryba1	0	0	0	24.3844071565544	0	0	0	0	0	0	0	0	0	0	0	0	0	0	0	0	0	0	0	0	0	0	0	0.178709353195161	0	0	0	0	0	0	0	0	0	0	0	0	0	0	0	0	0	0	0	0
ENSMUSG00000000730	Dnmt3l	0	0	0	0	0	0	0	0	0	0	0	0	0	0	0	0	0	0	0	0	0	0	0	0	0	0	0	0	0	0	0	0	0	0	0	0	0	0	0	0	0	0	0	0	0	0	0	0
ENSMUSG00000000731	Aire	0	0	0	0	0	0	0	0	0	0	0	0	0	0	0	0	0	0	0	0	0	0	0	0	0	0	0	0	0	0	0	0	0	0	0	0	0	0	0	0	0	0	0	0	0	0	0	0
ENSMUSG00000000732	Icosl	0	0	0	0	0	0	0	0	0	0	0	0	0	0	0	0	0	0.773602875141502	0	0	0	1.46399970336213	0	0	0	0	0	0	0	0	0	0	0	0	0	0	0	0	0	0	0	0	0	0	0	0	0	0
ENSMUSG00000000738	Spg7	34.5215388436217	21.1695137656655	2.72244357611222	1.22901236348409	2.00963493478203	2.4129801142004	22.7343284294387	0	3.32677026139242	5.80540733612145	0	0	0	0	0	0.120924431392461	1.87177739461853	0	0	0	0	4.72147008224971	0	0	26.7636172822051	0	0	7.62912522978388	2.24405667102083	0.847945634490692	2.54550548130289	1.3945108836521	0	0	15.4595734935866	4.11026884825229	0	26.2417152767659	11.7222184690579	33.4072931103945	0	15.2743560356316	1.24720369604026	0.401015824574078	14.9099578513011	17.8352800635945	0	17.0213870197295
ENSMUSG00000000739	Sult5a1	0	0	0	0	0	0	0	0	0	0	0	0	0	0	0	0	0	0	0	0	0	0	0	0	0	0	0	0	0	0	0	0	0	0	0	0	0	0	0	0	0	0	0	0	0	0	0	0
ENSMUSG00000000740	Rpl13	126.603605663893	148.107938225623	297.427747523663	99.3460117765954	102.114752596189	69.9062376705709	222.944456095946	208.056655662973	200.847561377137	155.030432105941	187.703397247237	177.909121861341	123.125883732481	236.082147183212	85.3770025078409	68.213122255911	165.502526319249	150.536859132448	187.783793474104	179.939675119646	214.5604426975	155.282913845363	216.494630060612	168.865938819704	123.448917175738	172.904278101391	109.63063111013	112.408252026559	149.559709810655	137.148981575657	221.019553234606	196.099605186222	223.024111665654	263.479265082838	186.963117933328	190.248716344567	214.794985359185	190.444701944103	188.729323996399	223.088454428701	244.169472034369	282.408985238741	251.886123564681	285.033935070341	270.58485214044	307.09459570227	193.185953777717	190.890581631476
ENSMUSG00000000743	Chmp1a	33.8217842437577	20.9255197397754	0	17.212719522079	4.52208806433022	0	0	15.3694626182837	15.267054945974	0.471538011372729	28.7029665807108	6.79546013130031	16.4764227280963	0	8.17948315391944	9.51747711454002	8.39982988199302	11.7969709835148	33.2181306010083	42.0565906054765	47.7746381467641	0	65.0583380359238	37.6523123620115	0	62.6241656215996	5.78443417555698	24.2028829767965	0.123944352563229	13.4647650767827	27.5518996448845	0	30.6798698734733	32.2297127948376	42.5786027081082	27.9621572588823	37.8560844204757	18.5531830773278	0	0	2.68478990502077	16.7351987267986	29.2765058307055	37.5148955730716	37.8872190739338	94.3434339618098	28.2109072680989	0.367238245698053
ENSMUSG00000000751	Rpa1	74.3362253365032	124.708464826862	2.82527341314021	108.362970034433	28.7567302302675	21.1079090864719	64.9203110641528	54.8447526465994	12.4426035181935	27.7982562760421	70.0585356001697	103.929805789456	57.6028499088085	50.2026217195693	21.7787680720282	100.785288971144	36.2776115360982	43.1217725988251	23.9433501061261	0.138595409394369	99.6734640978977	27.609135812971	19.9524544745287	49.1339154662915	25.0035548819001	66.6956624148462	3.60516052551521	129.153422560688	64.4889265771902	35.3706429538169	60.5896489635758	34.5803468101524	81.2597529562329	57.4269693912086	96.8079818924836	43.8478041542037	72.0497068505669	83.1207032216942	30.1478614019486	35.2410748668397	38.1199637097719	75.1717406466044	56.5709058314368	71.1333631226649	22.811326694694	161.136647005495	73.5398126006397	30.2124231757521
ENSMUSG00000000753	Serpinf1	0	0	0	0	0	0	0	0	0	0	0	0	0	0	0	0	0	0	0	0	0	0	0	0	0	0	0	2.17360269685272	0	0	0	0	0	0	0	0	0	0	0	0	0	0	0	0	0	0	0	0
ENSMUSG00000000759	Tubgcp3	10.0503160865095	18.5773987393958	23.41780476821	9.3507480272164	6.35821473063389	6.00568445566282	0	0.407596107666644	6.8105877595436	0	12.8655509377758	10.0500823403529	12.5422857879964	0.0626116208827817	7.82265805761766	11.5095416522083	6.83856005803981	5.33937670685899	0	11.5493586345739	0	0	8.48897026790473	0	4.05983154985908	23.7880885791605	0	8.91027147644111	0.236663119506819	0	0.0865982482796185	0	9.68381075323745	8.72544562580876	22.5714033573741	0.317178975480014	6.70833037807979	5.75375505119018	9.55863998440678	0	1.94541050217527	0	17.9213476470407	3.17190037714581	6.71561520692137	35.6826824752302	23.8221124725148	9.04568491189307
ENSMUSG00000000766	Oprm1	0	0	0	0	0	0	0	0	0	0	0	0	0	0	0	0	0	0	0	0	0	0	0	0	0	0	0	0	0	0	0	0	0	0	0	0	0	0	0	0	0	0	0	0	0	0	0	0
ENSMUSG00000000776	Polr3d	33.4437481830093	1.23661312010174	25.1850474594388	32.518936300524	1.29609952229226	0	30.6328227041432	28.1438400004273	1.23915644016414	0	22.4491542809168	9.49052654535375	27.5787836520124	18.0447832170542	12.4760980426633	17.1328395242771	14.8155050260801	1.37752270899408	25.7167636394952	36.2976229651858	22.3039659751926	28.7121822045025	14.8294923783318	3.05488913709831	6.61635897151525	29.2785800694006	14.9211648214613	7.38606883864347	0.71048689836525	16.9133957762876	32.1071349756769	136.18998809274	33.3787226056463	18.3883187554229	0	3.96751556574509	3.74680821234254	11.2776491425959	54.7137356517394	3.08613468741417	0	0	0.49359375426681	18.4099142842834	37.8632737463335	0	0	12.1044505160532
ENSMUSG00000000782	Tcf7	10.6712560972519	1.47894218257044	25.7714287325	26.2902298593325	44.7090820703418	1.49511005567416	0.181995474364038	16.2308030841719	34.3550812365051	19.9838707387403	13.0375870412904	32.8034687589119	69.0058946129039	17.1666037671576	68.4430428987827	42.3540930437474	63.2813557535725	11.8454072241667	49.6561730186079	14.1364149687185	42.5137522204131	73.8306311941701	31.6492229436503	24.1161929730107	49.3452805703557	51.9012841727138	1.3519049016016	17.4715794849093	0.154493684414051	80.4149000199067	37.7346670983541	2.76940666916052	45.8510506182917	27.536812982155	41.3427466046554	33.818891081581	21.0473085573837	2.32813096947331	33.695352981832	49.4153489335607	15.0164659303042	97.7277965821632	60.1052405195722	0.172551380516732	99.7973178847085	16.0256735805034	17.7336820426974	20.3700409625216
ENSMUSG00000000787	Ddx3x	163.771751371454	181.848587529479	160.320140285685	115.596233600585	158.35760799018	161.63734825888	236.107829732083	49.8992177689559	189.829162407563	114.392422971201	128.275966871905	291.805419051741	49.242054557839	185.68079508192	218.523366040552	107.103504467825	249.941568560514	270.373105369523	163.026946664276	224.952115742951	77.0341061679638	1.28172799498447	125.592693404308	82.0352671403558	100.068962217698	156.146444480956	357.206348894141	207.128712224081	142.867134400231	186.360132135807	133.223454087291	168.069449649167	65.7071017381987	81.4371859008728	233.693613995994	112.524786323278	103.347152271993	281.806643310798	267.252400908426	45.2173732073708	75.7225996599196	112.437375052661	72.3445502629516	116.047915378791	62.3201343740674	52.5467681798728	17.7937413051171	287.19394821474
ENSMUSG00000000791	Il12rb1	0	0	0	0	0	0	0	0	0	0	0	0	0	0	0	0	0	0	0	0	0	0	0	0	0	0	0	0	0	0	0	0	0	0	0	0	0	0	0	0	0	0	0	0	0	0	0	0
ENSMUSG00000000792	Slc5a5	0	0	0	0	9.41764713745075	0	0	0	0	0	0	0	0	0	0	8.30327112564402	0	0	0	0	0	0	0	0	0	0	0	5.05903718157122	0	0	0	0	0	14.0345065323168	0	0	0	9.32286052495717	0	0	0	6.91693987349489	0	21.6573197882169	0	0	0	0
ENSMUSG00000000794	Kcnn3	0	0	0	0	0	0	0	0	0	0	0	0	0	0	0	0	0	0	0	0	0	0	0	0	0	0	0	0	0	0	0	0	0	0	0	0	0	0	0	0	3.90103387243096	0	0	0	0	0	0	0
ENSMUSG00000000804	Usp32	0	0	0	0.103286418493696	0	0.227121753249113	0	0	0	0	0	7.73794411882895	0	0	0	0	13.2529046717576	0	24.5445927330559	0	0.0524587279908358	22.7623800032362	0.0408211528238415	1.23395799327425	0	0	0	0	0	0	0	0	0	0	0	1.00258291780636	0	2.81164254451367	0	16.5251041792612	0	0	0	0	0	0	0	2.22953781821841
ENSMUSG00000000805	Car4	47.8459543940687	21.0034272552458	0	64.9601173647433	107.930820822554	0	247.860062365062	0	0	0	23.4802411582538	71.1478956826658	25.4106777487963	0.136433460763905	0	148.811413602327	0	93.9868469679798	0	0	0	0	0	0	47.5186143235591	0	0	0	37.5429083056018	0	10.944679525195	31.3072549451132	0	33.9969833071503	0.191006117557686	0	0	54.0881902495898	0	33.1932865267374	50.1821877731937	197.255144379255	91.7170506402425	17.970445147915	0	0	0.607127779456929	0
ENSMUSG00000000811	Txnrd3	0	9.33346397594419	0	0	0	0	0	0	0	0	0	0	0	0	0	7.12780447748665	0	0	0	0	0	0	0	0	0	0	0	0	0	0	0	0	0	16.0609684081149	0.132411152016365	0	0	0	0	0.141169194734582	0	0	0	0	0	0	0	2.22440711727826
ENSMUSG00000000817	Fasl	0	0	0	0	0	0	0	0	0	0	0	0	0	0	0	0	0	0	0	0	0	0	0	0	0	0	0	0	0	0	0	0	0	0	0	0	0	0	0	0	0	0	0	0	0	0	0	0
ENSMUSG00000000823	Zfp512b	1.4726878961645	2.9022093290329	9.48237891389042	0	6.32066090892579	3.26575067226918	16.2052137690886	20.3075513420436	2.0772701792825	6.28703500097226	8.6485376592926	7.30175865065438	0	9.61052523675303	13.4303322092733	1.04293326775401	3.68106404613793	10.4439796086284	0	10.1602239100382	9.1698780910853	0	5.01794470659239	7.84862514981982	0	3.20096025734799	0	2.13333306294383	0	12.1512477144178	8.2259943083866	9.82102365054721	0	15.7762125550259	6.12077841558642	25.0741856862729	11.8422889469079	0	12.1865501348335	15.1088766403362	6.44980364847869	0	0	2.86002012860883	1.57994101827388	0.870041842957155	10.5748405192673	6.8373182337821
ENSMUSG00000000826	Dnajc5	23.0783939545641	16.3444932837057	8.01587449278582	23.0453643311348	7.73833251650091	22.07650880424	33.5990134877805	10.8490324364356	42.0897048380419	22.190024064599	2.00319806645041	33.6066391947943	8.32220881325022	0.270041318428428	0.066942061617755	6.83608263335382	0.0434380342960208	16.4489355761426	7.96023793868312	20.9588032495236	74.1680252611983	0	4.10313350863315	13.248162032896	0.0476459448394219	0.0522521198344594	0	5.94061452667879	0.116653508294804	11.3503492821165	22.9432425026393	30.1117710612017	22.7612960165744	4.5571977218881	30.5685608153344	0	9.03547677238608	11.4849550198382	18.0609217113681	9.44316944453229	26.3700631395102	24.7049831325503	18.2345019014774	6.05840727292495	0.672803002422798	0	25.9219898426953	5.22774443876052
ENSMUSG00000000827	Tpd52l2	37.7620017417659	17.2143397085347	36.4932509306119	18.6288727823556	32.129418368529	26.7841373883819	70.0976647672206	37.4323436884883	23.3368452002229	46.5308257878439	47.1277130931783	14.2005053508359	64.9267625447585	15.1827273884059	49.3756221628523	33.8307577776207	27.7047904805954	46.2000233310118	42.1839026570084	20.3280129188749	27.980234587613	80.5697134713389	17.5568648291252	53.4139844770701	53.2631645582636	70.8095199763018	69.3319354394238	29.4468677501887	4.15151385004639	51.9825054717216	23.6800146146735	29.0865523813376	15.0092803449527	40.7446189460749	42.5114747681219	44.9113205601801	48.562417339488	35.1649649644454	44.932898740028	28.0458022595903	38.0234278825347	72.4206906028685	28.2761255455133	86.6436867292592	7.88743354417984	0.118927839232	36.0176341295301	42.0271812187399
ENSMUSG00000000838	Fmr1	21.1754886679612	18.0282911098018	0	8.22789332421787	8.6263829864649	53.354106799399	47.741842037053	0	0.542355527583553	19.2729986392701	7.01271888293136	12.8503690338048	10.8631435423271	3.17111169856733	12.3551930352357	1.49288938604315	17.8870277109506	46.3198819877832	0.536786647020762	19.3141962265003	31.0946974605148	0	18.5320567091417	0	1.62574383187754	12.4803891006436	11.5441912813822	1.04845743885477	2.35203969691256	14.2712484697086	66.9067377017093	8.91887325139527	16.7942004616336	3.25794241763501	14.7845040790541	22.3283244509896	37.5687937873976	19.6304596578388	4.87164413035303	2.05402280485106	4.94910292483259	5.01965448474311	4.39929334050516	2.82902664911439	39.757254608459	29.4729342844083	31.373505189587	5.99729627610978
ENSMUSG00000000861	Bcl11a	0	0	0	2.2276940173942	0.53600433858247	0	0	0	0	0	0	0	0	0	0.900867395667581	0	0	0	0	0	0	0	0	0	0	0	0	0.605400823666523	0	1.07588371867378	0	0	0	0	0	0	0	0	0	0	0	0	0	0	0	0	2.50651225290886	0
ENSMUSG00000000869	Il4	0	0	0	0	0	0	0	0	0	0	0	0	0	0	0	0	0	0	0	0	0	9.32862703590538	2.55506482222577	0	0	3.55314414874324	0	0	0	0	0	0	0	0	0	0	0	0	11.5694599948184	0	0	0	0	0	0	0	0	0
ENSMUSG00000000876	Pxmp4	0	0	0	0.254733363529732	0.539946872864792	12.7433245753645	0	0	0	25.1447568851918	0	14.1506817592573	11.3107767208316	0	0.0747347711028019	0	0	30.6445115800272	0	0	0	0	0	9.37332561210871	0	0	0	4.84833769320283	0	0	4.52713617017844	0	0.328944117500965	0	0	0	32.4796573917766	0.39250762972816	0	0	0	0	43.4286419939106	0	1.5022476801046	3.23457752598426	0	0
ENSMUSG00000000881	Dlg3	1.53859023634548	0	0	0	0	0	0	0	0	9.3723424450737	11.7805067712581	0	0	0	0	0	0	0	6.93154997712759	0	21.7849140633812	0	0.0536458681873892	0	14.6253972711966	5.34643618616935	6.88213053091164	0	0	0	0	0.248791666890704	11.3055121205375	0	8.48192669055957	0	0	0.278865790320212	2.05540201061002	0	1.85007793802516	0	0	0	2.4014369999208	0	5.10614824782821	0
ENSMUSG00000000884	Gnb1l	21.0121083584973	0	0	7.42947840231312	5.73386233953739	0	12.6203634060077	3.5224761027975	0	0	0	0	24.5990933756074	0	0.111779095684018	0	7.10816905405926	0	0	0	19.737785378915	0	6.62549661970822	0	0	11.2552496656966	0	0	9.83672864559927	0	0	14.1995274703595	0	12.0088322968791	13.978216667472	0	9.09520297222399	2.83747950770343	0	0	0	12.0693919363747	44.99502988283	0	0	0	0	7.43066550265219
ENSMUSG00000000889	Dbh	0	0	0	0	0	0	0	0	0	0	0	0	0	0	0	0	0	0	0	0	0	0	0	0	0	0	0	0	0	0	0	0	0	0	0	0	0	0	0	0	0	0	0	0	0	0	0	0
ENSMUSG00000000901	Mmp11	0	0	0	0	4.4788768032927	0	0	0	0	0	0	0	0	0	0	0	0	12.9941891144178	0	0	0	0	0	0	0	0	0	0	21.1678036825408	0	0	0	0	0	9.19194594818282	0	0	6.5997233205912	0	0	0	0	0	0	0	0	0	0
ENSMUSG00000000902	Smarcb1	30.7450894633238	3.78297574786231	12.1177491299604	31.7095817160167	15.5629711044402	17.7618948921778	35.0019984665136	14.7970648091286	22.0755797946165	10.9440820924528	33.5722932386375	8.97240677916352	27.2386918494872	38.7966868713149	24.2702158708804	4.891538115159	12.2257141790334	17.6223418122713	37.1734906655453	6.53174123219673	14.0221584549325	17.9769904403148	14.1137205506047	0.0956045133754983	45.2014374949455	13.8817936608229	5.2955291306431	7.54365307547898	7.10856029011059	22.0778738728806	56.2796009385564	43.147565444487	50.3769827162953	16.1702488609603	39.91950780086	16.5065858447412	17.6425213342793	21.5785152908308	16.5242728648469	24.6877684659139	14.2874193498292	41.8090587909024	6.21753847587788	35.9844698019603	23.3605007974136	6.57501482531354	43.0985183346021	48.450533655827
ENSMUSG00000000903	Vpreb3	0	21.7756197640081	0	0	0	0	0	26.8324456032823	0	0	0	0	0	0	0	0	0	0	0	0	0	0	0	0	19.2830183043365	0	0	0	0	0	0	0	0	0	0	0	0	0	0	0	0	0	0	0	0	0	0	0
ENSMUSG00000000915	Hip1r	0	0	0	0	0.36507413480276	0	0	0.0947831035551039	0	0	2.97017617657613	0	0	0	2.43177553880956	0	0	0	0	0	0	0	0.978511118849689	0	0	0	0	0.115970705248916	8.25510764527517	0	1.76204930751065	0	0	2.48589794055048	5.86030304228757	0	0	2.43270572193575	0	0	0	24.1246542726715	0	0	6.98303596611519	23.7192368083699	11.3924272059076	0
ENSMUSG00000000916	Nsun5	0.240325047875207	0.327013559858269	0	9.55489091722085	2.49268593871813	4.44457857643851	25.2314782040483	25.2395746247902	21.09479415471	0	0	0	10.8229652870405	0	10.5661151572779	0	0	6.12646168527627	0	0	14.9319631584756	10.8467610459182	26.5067999990253	7.20034640578544	25.8610423340016	0	0	8.57821453998178	3.94554753454926	0	0	9.20569508975062	0	16.1706393408349	0	1.46885385170175	0	5.56820761172387	8.72672610556932	0.0927393644353195	7.61780412030722	0	22.1896518596405	0	0	37.8803763342263	0.0921637876930216	10.0203213892205
ENSMUSG00000000934	Top1mt	0	0	0	0	0	0	0	0	0	0	0	17.2074178523746	0	0	0	0	0	0	0	0	0	0	0	0	0	0	0	2.84413634832825	0	0	0	5.09349623860316	0	0	0	0	0	1.92685563684733	0	0	0	0	0	0	0	0	0	0
ENSMUSG00000000938	Hoxa10	0	0	0	0	0	0	0	0	0	0	0	0	0	0	0	0	0	0	0	0	0	0	0	0	0	0	0	0	0	0	0	0	0	0	0	0	0	0	0	0	0	0	0	0	0	0	0	0
ENSMUSG00000000942	Hoxa4	0	0	0	0	0	0	0	0	0.277333161874879	0	0	0	0	0	0	0	0.189475942572291	0	15.3483152294269	0	0	0	0	0	0	0	0	0	0	0	0	0	0	0	0	0	0	1.02239126639355	0	0	0	0	0	0	0	0	0	0
ENSMUSG00000000948	Gm38393	0	15.5624536866791	0	0	0	0.752427894199515	0	4.95454323880555	0	0	0.915528231115009	1.08507542420038	4.13426803422785	7.50792079061123	0.0446173460916651	8.2222817505645	0.0579034993213636	11.2374123166644	0	0	0	0	0	0	2.09591917129228	0	0	0	9.40779457668962	0	0	5.20325639527858	0	0	2.30379157741356	0	2.64806292959798	6.09259734150896	1.6748144659795	0	0	0	0	5.38396034875347	0	0	11.6706813525745	0
ENSMUSG00000000957	Mmp14	0	0	0	0	0	4.97533827251748	6.17212000936764	28.8289170744966	29.3723737871324	35.7242260911404	0	2.03490654816485	0	12.6913335317178	25.3419339114039	2.29168028956015	14.0370518005846	37.3595673054493	14.6026833018712	31.8443649377919	7.23296716673644	18.5940055251747	25.3014436616604	15.6462560908267	14.285157617182	18.4702388809272	0	4.77957565424643	0	9.12759411881394	33.0526915401794	0	16.3274393087769	0	0	18.3148506801167	11.9612870671427	7.65626963115385	18.1385778775242	20.0177918133637	9.29710726221856	17.9974545910502	28.5997828080494	13.0716356213598	0	24.9525372916962	15.2205711904927	14.6672244176968
ENSMUSG00000000958	Slc7a7	0	0	0.81165158878323	0	0	13.9438368691582	23.4905923359013	0	18.8029373948798	0	0	37.9268112761834	0.108418009384276	8.49591532594053	0	0	0	5.4985312048519	0	4.08114355596723	28.3172688434151	0	0	0.114350496390302	0	9.75399699535465	0	3.86691460171612	0	11.325484190336	0	10.5262515931893	0	0.448051410637556	0.22655687910613	0	0	13.5193125678315	0	37.1974653304134	0	34.3938952275084	0	0	0	0	0	12.9584695482003
ENSMUSG00000000959	Oxa1l	0	0	11.0388154156383	8.89880742687441	15.0899220291762	12.0343444575523	11.8978979903122	0	14.084318268803	18.6930913514527	26.2502094930781	17.7780003986557	0.161276958092383	23.4707183545246	23.705795614811	1.04192527232773	0	6.73591662070707	3.23950801695411	0.780543722505736	12.1127049921312	16.2260114513918	12.098521434638	0	8.69643791178249	2.36391310008097	11.0143699213391	5.81613338980726	0	1.80505689722252	20.0600946481495	0	7.00967589138191	1.2219126982947	24.0965123975466	0	1.89939441816699	5.21047934047483	2.20502833438808	20.570223582052	22.2871712203192	0	0	3.76016442286013	10.4958476011795	44.9325760215822	0	19.0741419002973
ENSMUSG00000000976	Heatr6	0.0538756416719774	0.164945965638123	0	17.9186408528711	2.462238492561	5.70652693005405	0	0	0.964163707804924	0	6.50953551458	4.59753409656522	16.1253843152136	9.48555814560476	0	1.74480447283663	5.22273507136404	0.1113583200858	1.31211261646351	20.2936368783147	3.76584855245009	0	36.5326105869999	0.118109330280059	4.12877089226983	11.7725922660027	0.921418280808071	0.133134152824312	0.631789876284289	0	0	9.66423265137803	10.5321562245316	1.38833814575183	8.77515252652461	16.2290485600024	5.27533941222637	2.79274162096036	3.65750883067465	0.0623704371813794	0	0	0	3.10479583263476	27.6934059015637	19.1992034539952	17.7892191170139	11.6996761559825
ENSMUSG00000000982	Ccl3	0	0	0	0	0	0	0	0	0	0	0	0	0	0	0	0	0	0	0	0	0	0	0	0	0	0	0	0	0	0	0	0	0	0	0	0	0	0	0	0	0	0	0	0	0	0	0	0
ENSMUSG00000000983	Wfdc18	0	0	0	0	0	0	0	0	0	0	0	0	0	0	0	0	0	0	0	0	0	0	0	0	0	0	0	0	0	0	0	0	0	0	0	0	0	0	0	0	0	0	0	0	0	0	0	0
ENSMUSG00000001014	Icam4	0	0	0	0	0	0	0	0	0	0	0	0	0	0	0	0	0	0	0	0	0	0	0	0	0	0	0	0	0	0	0	0	0	0	0	0	0	0	0	0	0	0	0	0	0	0	0	0
ENSMUSG00000001016	Ilf2	33.4138927373914	9.66648081026848	9.09418711977573	17.8432705067711	28.4543695124778	31.3078601401854	26.2254842210766	34.7600240876059	26.5344482418074	25.2649846662268	20.2685288051447	31.0504287289596	36.8621231906538	24.3843803510761	9.79177061472019	35.5946560368773	25.4151280974694	17.4536710214617	16.9683076439326	39.1948786965944	26.5771323460145	41.1132697760749	38.9508018217309	22.6206072859361	11.0427418156167	28.8784068345613	17.3025707467513	23.4729528272859	26.8473290747495	10.8500870107323	42.3305560398203	40.5566372937085	56.7083556412066	58.4537374438588	25.2971351601912	53.5810665081867	31.5214069409554	32.4323839308039	54.853492157789	54.4073315952963	31.8181061320432	26.0525528143776	10.6720952627081	29.7741630367158	43.8357974100228	49.8582649683986	34.732567894127	22.6526075271226
ENSMUSG00000001017	Chtop	73.2162119321324	136.048115764863	137.60138936702	81.3523249584221	152.005095413472	66.5441133522834	65.2834329783291	32.4550950306538	115.834977785872	26.4074251395161	116.638514806769	72.6948963403802	95.0641420035021	54.3536352780241	101.228894735426	81.6425437972021	92.5921054421664	74.6844766345021	22.0549403225559	79.7104612594644	65.0240140718081	76.2471332996575	94.388112946763	30.5383737672308	51.2818007329574	85.7077571463621	104.891576689772	76.5220969717477	33.1171676412716	86.2690143101212	73.2385457966065	43.1744179657414	68.439007863958	57.9904428180965	15.280909544549	5.10590999626171	43.734997454119	59.7075656248621	82.1161026127016	7.1551084293024	33.0098006908942	44.960848776579	21.3031101477209	37.3616200596443	44.6319974901969	124.136335779767	132.149643754934	28.0825682962723
ENSMUSG00000001018	Snapin	0.151016482049093	110.964697302824	0	0	23.6423165500659	0	42.3497110924614	40.2603856300777	89.3790282939835	10.7798943106485	0	93.7407692484745	0	54.9340690965945	29.1667293277091	0	0	0	0.875696702545151	7.25822343337927	121.216772200029	9.76950557843199	18.0711143610033	58.4333533290172	36.8895086853571	48.3883151566567	156.775216345666	62.6946748176926	47.4612694258887	40.4849976918867	43.0928009770959	110.685565674636	42.2704682486295	57.2928621484465	39.0276377529177	51.0289724289295	86.3876536259711	0	34.3329651925508	0	49.3772875350178	32.100507764194	0	0	0	0	92.2574405899481	42.7644927964229
ENSMUSG00000001020	S100a4	0	0	0	0	0	0	0	0	0	0	0	0	0	0	0	0	0	0	0	0	0	0	0	0	0	0	0	0	0	0	0	0	0	0	0	0	0	0	0	0	0	0	0	0	0	0	0	0
ENSMUSG00000001021	S100a3	0	0	0	0	0	0	0	0	0	0	0	0	0	0	0	0	0	14.2077771856818	0	0	0	0.0459613932422739	0	2.14316266026205	0	0	0	0	0	1.55677425198703	0.0655453879204745	0	0	0	0	0.080023246817219	0	0	0	0	0	0	0	0	0	0	0	0
ENSMUSG00000001023	S100a5	0	0	0	0	0	0	0	0	0	0	0	0	0	0	0	0	0	0	0	0	0	0	0	0	0	0	0	0	0	0	0	0	0	0	0	0	0	0	0	0	0	0	0	0	0	0	0	0
ENSMUSG00000001025	S100a6	0	0	8.99780546955011	0	0	0	0	0	0	0	0	0	0	0	0	0	0	0	0	0	0	0	0	0	0	0	0	0	0	0	0	0	0	0	0	0	0	0	0	0	0	0	0	0	0	0	14.2616550856386	0.439503855129491
ENSMUSG00000001027	Scn4a	0	0	0	0	0	0	0	0	0	0	0	0	0	0	0	0	0	0	0	0	0	0	0	0	0	0	0	0	0	0	0	0	0	0	0	0	0	0	0	0	0	0	0	0	0	0	0	0
ENSMUSG00000001029	Icam2	0	0	0	0	0	0	0	0	0	0	0	0	0	0	0	0	0	0	0	0	0	0	0	0	0	0	0	0	0	0	0	0	0	0	0	0	0	0	0	0	0	0	0	0	0	0	0	0
ENSMUSG00000001034	Mapk7	18.5742711785643	0	0	0	10.7143941144349	16.4743389156935	0	0	17.304478453553	0	0	0	7.27972403247379	0	14.1414038725925	0	16.1528887865623	23.3443558549186	21.1761558547195	0	26.3148452180884	0	0.642138844602622	13.8032551855749	0	5.37439333149403	0	15.2998632959419	18.182190840377	0	24.0626457110873	0.551486307582033	0	12.5069972170572	13.7593086859499	2.88622761847812	0	0	0	0	0	0	0	4.02024296322267	6.49426390137889	0	6.06676417581745	14.835455630605
ENSMUSG00000001036	Epn2	0	12.151356007243	0	0	0	0.917523226591673	0.822425991172608	1.87038899414037	23.5071152807841	0	0	0	0	23.9086330680214	0	0	9.01221227693119	0	4.06592612042483	25.3603884282149	19.8821388657539	16.2215234037709	0.359800826725825	6.1631811630408	0	11.3968389881935	14.707266885729	2.56093101045813	30.7960464556223	26.013992419726	0	15.2031314852538	0.39186380332747	14.5839534330897	3.59141188904371	24.0847319055007	1.02270377180811	0	3.23750478064055	13.9374066948439	0.990948880251522	20.3738954974795	7.54477124922901	0	1.16323623921183	18.2464150160033	18.0366189630018	3.90728006478739
ENSMUSG00000001039	B9d1	18.4528300256472	25.0351666327088	52.8425144545595	0	10.3437957994912	68.7096769151365	74.9745951358442	114.874860518243	13.87536283831	0	30.7268056172836	37.8128983266858	18.5004817896596	0	18.4075541299308	10.4603049098868	20.4762476244225	15.9295175834222	45.8220805633105	26.2062777492133	0.758725105404178	34.4569074033384	2.9520381703117	25.6997895277187	74.0342012497089	43.3325222534271	50.494878622282	29.6843751995307	9.92861954920811	22.1251532109142	35.1657383804851	18.558327804952	2.8935931692034	73.036880136414	0	22.1774406810206	68.8055580915019	35.294640874313	31.5323512012913	0	65.6086647049074	32.4903674995215	76.0512400641951	67.1033146453957	17.9132426758687	0	36.2155087026128	31.6806959678652
ENSMUSG00000001052	Sec24b	0	32.8306404164685	0	7.51074128900338	8.37904266827723	0	0	11.9503387176161	0	0	0	0	8.53737794992841	0	52.9234653996906	14.4298199973341	0.100340416099745	0	20.2533228054429	9.82408925424205	11.7786401080819	23.2053119349555	0.10415496800236	14.0420320106393	0	13.7598753388125	0	0	0	1.2727635802754	0.0616257301710774	0	0	0	18.8382797657408	33.5560603547367	0	0	0	14.1654141403537	14.4053306889546	0	6.78617619030677	0	10.956775712529	15.6490466301591	0	0
ENSMUSG00000001053	N4bp3	0	13.3254129769555	0	0	0	0	26.0934677091768	0	0	0	0	0	0	0	0	0	0	0	0	0	0	0	4.71179054295132	0	30.1165685880455	0	0	0	0	0	0	0	0	0	0	0	0	0	0	0	0	0	0	0	0	0	0	0
ENSMUSG00000001054	Rmnd5b	40.4879311452027	1.46985861188955	0	0	0	0	16.1383076237893	0	0	0	0	0	0.498943592469516	0	0	14.9161768999709	0	0	23.9416532067435	0	0	0	56.7242125829047	0	0	0	0	20.5638975487837	0	15.9551899072932	0	0	0	32.9911802224192	49.6983599055369	30.6006525867085	0	6.22163644086459	0	0	16.5730084422839	0	0	72.1026823723317	0	59.7707875621163	0	30.9992583761058
ENSMUSG00000001056	Nhp2	176.836874276579	154.291118344673	618.488223760839	263.721050109977	154.641349777872	78.3867328491179	498.164968277218	479.046211532882	239.164761970075	220.794999307764	345.514708931676	322.426740160999	235.5267727162	257.227551539405	188.656778125587	194.507264450877	129.137940406208	132.857180682678	226.782521961745	156.843200272615	232.729988221542	217.465570113191	253.321968686088	297.700441518731	212.471602996813	256.155029040898	106.834107898163	219.985599876861	142.613443629594	185.867907277984	313.687872482861	414.021463869045	651.156936136734	517.129912809019	485.945230555499	124.101671181007	455.666587687828	379.692563869601	267.754020890956	192.142853356894	557.810606154495	663.704322567621	377.378698451994	494.843029727958	286.149868443965	347.950686885884	560.005269007294	304.857093571476
ENSMUSG00000001062	Vps9d1	0	0	0	5.8496232045799	0	0	0	7.04827244034022	0	0	0.849494595194624	0	0	0	0	0.477103554170411	0	0	0	0	24.4716453897711	0	16.3050125340857	0	0	0	0	0	0	0	0	0	0	0	0	12.920811530538	0	0	0	0	14.5123229832942	0	16.676054930201	0	0	0	0	0
ENSMUSG00000001065	Zfp276	0	0	0	0	0	0	0	0	0	0	0	0	0	0	0	0	0	0	0	0.978588852660497	0	0	0	0.0685482632068446	0	0	0	0	0	1.38554010004664	0	0	0	0	0	0	0	0	0	0	0	0	0	4.42299424742256	0	0	0.143895505052721	4.56305141743302
ENSMUSG00000001076	C1ql4	0	0	0	0	0	0	0	0	0	0	0	0	0	0	0	0	0	0	0	0	0	0	0	0	0	0	0	0	0	0	0	0	0	0	0	0	0	0	0	0	0	0	0	0	0	0	0	0
ENSMUSG00000001082	Mfsd10	16.3712511794271	3.90246727825334	0	22.4760383243227	12.4332562643264	0	13.0412271928965	0	0	91.1648845263229	44.8277716148255	13.5501056625785	18.5043018193581	6.20984392492849	6.51370084808021	13.2147756296405	14.0889177892645	0	6.5135615822346	11.7538868412159	78.2378242587856	0	10.0746718012787	0	0	19.0818819487794	26.3642477139393	12.1071572930718	20.3193360850374	36.9334529053033	0	0	0	5.30338668672754	22.7075517435113	24.2586020845702	47.573394770069	7.74300642058765	19.432246074174	0.138339957245084	21.0925825869684	58.5775523894651	0	28.0157497996888	28.6111220395539	3.68520142051445	0	53.4576557585414
ENSMUSG00000001089	Luzp1	14.3668577036177	14.6183768718299	13.2673817397259	15.8413252506308	13.8043488456514	0	14.8409771069787	27.208125501828	8.1198582278421	17.7358048325911	6.67173893075527	18.7881008432058	8.90539274197285	8.89464761573399	10.2706138612743	17.5781370376143	22.4507970208975	29.299064513033	13.893049090749	37.4534616722762	0	22.8329311951312	8.3864522251111	10.3272792052491	2.20528127974594	4.97131383163198	3.79139996442757	5.82929113570667	13.5481933863469	12.1844519375033	6.76849858890817	28.5577992942896	21.8453442885053	8.48353752673514	4.81433368100525	13.4003425143627	2.69136331598894	12.6566291609681	6.93255918869077	17.5205031897044	38.263110303179	14.6100079992864	29.5219203273139	6.81207835434953	4.49807622677472	29.0698226123547	5.49328895521779	11.9241968643842
ENSMUSG00000001095	Slc13a2	0	0	0	0	0	0	0	0	0	0	0	0	0	0	0	0	0	0	0	0	0	0	0	0	0	0	0	0	0	0	0	0	0	0	0	0	0	0	0	0	0	0	0	0	0	0	0	0
ENSMUSG00000001098	Kctd10	14.6413825713306	11.1846895798615	0	0	0	0	12.6560977623172	0	0	0	1.77348177277639	0	0	10.5591188992404	0	0.135265308499911	0	7.87546497154451	0	4.88083001655006	0	0	7.21864327628139	0	0	0	0	1.90425678207808	9.94034321294915	0	0	0	0	3.43221357888735	4.92757005131858	0.672837202751364	11.9139039047079	0	0	0	0	0	29.9949555390599	0	0.11582072978078	3.22727578390297	0	9.66875836779671
ENSMUSG00000001100	Poldip2	19.380248930794	23.7898474865568	0.101605868993482	0	0	7.03158861764105	34.6022323384442	12.7394955370689	33.3041718498913	0	22.7219441086244	0	40.6623420762882	0	0	23.6846944988387	28.0229058983721	4.25144165323601	0.106018791902109	24.8294610157594	1.17148118970812	0	13.8396980612599	16.3332590462643	43.9607961256112	22.6647955203075	0	21.6866138487997	24.9781125376009	9.31677744250233	0	23.9568684240756	16.9232748793617	65.6988099378163	43.0808415990986	26.8191047435218	0	14.4315810822493	18.9068534454455	23.8118062807657	0	12.0952486946983	0	39.6313985584127	35.2426590963793	32.1073728485418	50.903938300781	29.3810011744575
ENSMUSG00000001103	Sebox	0	0	0	0	0	0	0	0	0	0	0	0	0	0	0	0	0	0	0	0	0	0	0	0	0	0	0	0	0	0	0	0	0	0	0	0	0	0	0	0	0	0	0	0	0	0	0	0
ENSMUSG00000001105	Ift20	12.0189314270809	27.5400634444376	0	9.36282917545478	9.26145201419547	12.2958504578667	13.7839195338009	0	27.5387283296479	25.040059827532	26.8779077109331	0	0	21.1064800415872	18.7705321294016	1.25388723515343	26.5385596260139	27.1861805144809	17.8837364616828	23.5727616409727	41.2129526762364	26.6111946079988	0	6.21429336940739	119.913314404336	4.28823724967996	8.92035611302696	0	8.50981605952808	18.0874310240842	40.3828358521712	0.953402295940506	0	24.0243697362839	32.7500967913105	0	7.88856686411725	10.6865028106972	32.5803579985231	0	13.4409678654854	7.86994047828752	0	49.8984647920516	42.0253049698926	47.0113560009918	37.830364172631	33.6842959552474
ENSMUSG00000001119	Col6a1	0	0	0	0	0	0	0	0	0	0	0	0	0	0	0	0	0	0	0	0	0	0	0	0	0	0	0	9.04016359589934	0	0	0.169400408963418	0	0	0	0	0	0	0	0	0	0	0	0	0	0	0	0	0
ENSMUSG00000001120	Pcbp3	0.471636882226284	18.7715594880388	1.70367372356988	20.8249084351968	4.81544981985956	10.1101316413925	0	0	0	0	31.2064128964671	23.5696710720274	18.8709437336402	0	0	0	0	0	0	0	0	18.8032713874086	22.874320180375	28.5628670006754	0	7.67990362460204	0	11.5576755438723	0	25.2092242308008	0	0	0	0	0	0	42.9911005591722	0	18.8015482805458	29.6205988646432	0	29.6665630457096	0	29.4964024570666	7.65577788068852	0	21.5688715867211	9.7299979792689
ENSMUSG00000001123	Lgals9	0	0	0	0	0	0	0	0	0	0	0	0	0	0	0	0	0	0	0	0	0	0	0	0	0	0	0	0	0	0	0	0	0	0	0	0	0	0	0	0	0	0	0	0	0	0	0	0
ENSMUSG00000001127	Araf	14.539463319128	10.791297492036	0	24.9820175769006	1.90220451911743	16.0669282469698	31.844338848745	0.854250652924703	35.346601191704	14.6833519694879	0	9.70342330555376	14.4509554183816	0	10.6026257467985	0	3.55540410326218	0.437125244843753	40.0394611859026	12.1145440061434	21.0033807614493	6.56219922778774	4.55329660606554	0	9.72423067695339	2.49945031560997	1.98931121814943	14.7635618940004	16.6161606765457	5.09552971665982	11.1165619237819	21.1907665175789	2.50562784136494	15.0625691701797	0	10.8022207628393	18.9367234709978	14.7621513467216	0	1.77500676528833	19.2153829439912	8.25675990402814	56.8569294778861	22.7824011617127	15.5909469826382	24.2760429100175	1.27737234381383	12.4918270470622
ENSMUSG00000001128	Cfp	0	0	0	0	0	0	0	0	0	0	0	0	0	0	0	0	0	0	0	0	0	0	0	0	0	0	0	0	0	0	0	0	0	0	0	0	0	0	0	0	0	0	0	0	2.15576003495194	0	0	0
ENSMUSG00000001131	Timp1	0	0	0	38.4113815803583	0	0	0	0	0	0	33.1624670381659	0	0	0	0	0	0	20.5266114235181	0	0	1.36109132084331	0	0	0	51.1099874574151	0	0	0	0	0	0	0	53.0622423055273	0	0	0.510058082190833	0	27.9873852467653	0	0	0	0	0	0	0	0	0	36.8735320528488
ENSMUSG00000001134	Uxt	8.86196781176434	10.9819393583459	40.8061320427137	67.7568988190494	6.5655431345004	6.91758262489062	13.4081473639155	24.2904401071147	0	45.4201293517134	26.2224266512892	21.7056698470917	0	0.163653559403195	8.09351580305377	27.6668311321443	7.55522315489294	7.8502519947245	22.5127249898978	9.6694609327863	9.58660049287073	40.6322271826267	0	0	52.5524015630324	7.9799411906796	0	15.4684448446521	0	25.9452739356811	9.73303020871573	29.2739295565625	14.6868832059812	22.6554366422132	7.78987975718483	0	19.0293203340907	10.9375280445055	0	0	0	13.7297809976226	23.2064353363586	12.9887288415203	0	0	14.5651398952083	21.2608313958492
ENSMUSG00000001138	Cnnm3	0	0	0	0	4.19039143202732	12.8376856415947	0	12.402501973695	0	0.781049098588412	8.74001467734839	0	7.89348969725098	0	1.15999540044424	0	0	0	10.1204349753956	0	0	0	0	0	24.5623603001567	9.90328241613308	6.81743320706415	0	8.71734223971809	3.93843010681481	0	0	32.9477498850371	0	0	0.352750449365623	0	0.380769083792364	9.26991545702732	0	3.68394608103258	10.2817952899745	0	4.58591577892015	0.801526355674499	0	21.1330273164383	0
ENSMUSG00000001143	Lman2l	10.0566839506697	0	4.3874847400186	7.65321623539102	1.9192436909428	0	7.9201047241586	18.5078209769023	0	4.6124734625159	0	5.27377873170268	0	11.1169447041528	0	4.75139844897308	5.08915027925925	0	0	25.7379905466013	0	0	8.94637250635841	0	0	4.6407181662788	0	3.87094318512145	0	0.156176860033793	0	13.3690952468987	16.9121260769952	2.35472051996297	10.8180217079906	2.21572724167367	11.0193702502642	2.65746706666338	0.593547510160963	9.73823816983858	11.6311802966074	6.11580678219958	9.18853045040342	24.4969499653289	0	0	3.67648224758971	3.796342207261
ENSMUSG00000001150	Mcm3ap	9.51422721838262	0.784614443744974	0	0.220436207873165	0	0	5.5095545334257	0	0	0	1.76940215960201	18.9860522585667	3.64549342516991	0.335424990239896	17.5585902358302	9.94443408574118	6.16890703232655	5.90956493949277	8.19190721072042	10.902896644516	4.36638549612759	0	0.392046419783788	3.58161579773542	0.644428451098931	3.73556554140138	0	0	5.97302593972625	0.638769216611746	0	0	0	0	5.00899410912427	6.10453841428228	1.30008570352541	4.86846895797879	10.2415707444432	13.5732699804384	0	0	0	11.1395977730425	0	0.164651520092767	0	6.63661813421983
ENSMUSG00000001151	Pcnt	5.37777222277998	11.3248691744318	3.44716762068911	4.17700678114378	1.77076274435514	0	0	4.48244379032497	10.0751299677399	11.7105460283666	3.56890792215904	6.45285597951327	0	3.35450748288623	20.4882970724958	2.51726580037385	0	0	0.626979817800552	0	5.0053758167198	9.71731401440487	2.26991672901637	0	2.69844851015152	5.53004467695115	1.94654729126444	13.1017158406398	0.367040080422555	2.86837808353821	0	9.37072974076241	3.03405885702881	5.21411811095738	2.74980289727978	5.55264151479624	13.7472625242019	3.72091032433924	9.34390483043752	3.75518885424299	1.00076825765562	4.44359606156394	14.1404823194547	7.15533123090611	11.8932184979128	0	4.71395707518442	1.75485131098005
ENSMUSG00000001155	Ftcd	0	0	0	0	0	0	0	0	0	0	0	0	0	0	0	0	0	0	0	0	0	0	0	0	0	0	0	0	0	0	0	0	0	0	0	0	0	0	0	0	0	0	0	0	0	0	0	0
ENSMUSG00000001156	Mxd1	0	0	0	0	3.75650934406041	0.739944173481273	0	0	0	0	0	1.02896292650417	0	0	0.0329078163481512	0	0	0	0	13.0633032572701	0	0	0	0.750425132561356	0	0	0	1.16813045260174	21.6191759669479	0	0	0	0	0	0	0	8.94644060260909	0.0576107069651909	0	0	0	0	0	1.08881580253947	0	0	0	1.48671252465148
ENSMUSG00000001157	Gmcl1	0	31.9065992126937	0	6.96360119510247	0	0.0671605985273828	16.7756493773104	28.5062410096802	13.1402015378887	49.4845482398444	21.4511568705216	25.1539061704053	0	0	0.179211517953277	0	0	0.165133772515959	0	18.3954508565343	0	70.5943782371382	0	28.0815619516067	0	11.6943752879532	8.56261960239733	0	0	0.118004570356659	2.74254905132212	25.4526941293938	0	23.8665179639856	0	0	8.50903818930114	1.8196926952221	9.24978388264665	0	40.4840961204336	10.3972482928246	13.0175565194284	7.18521169062242	12.9684255298356	0	31.8640007954416	22.7162843871361
ENSMUSG00000001158	Snrnp27	50.6410795356895	39.769397162083	102.527899388758	75.1353874586259	63.7044428536892	72.4020134472948	121.450028381064	45.6259133433355	42.835216486164	44.0940661914031	90.551407002417	92.4292881757622	16.0431505122089	126.01030085616	186.356623615666	80.2998785402328	96.5097827948592	26.265438934445	74.8866073977289	170.019824831314	94.525087832284	73.0718599061816	75.9446771316062	52.2075065705303	110.908321446994	81.2847003619475	125.246225063322	123.280268725914	90.293022280368	102.18829638259	95.9274770953705	47.7522897363415	34.5719014031989	122.089741080995	74.6129994002284	64.5988422265598	52.8751396999089	84.0573143986486	129.289841818482	74.0996104141934	94.9053725916342	46.9580433920684	142.635428900387	139.311522171409	64.682189225085	20.6422992288757	105.044893665392	98.1167833362027
ENSMUSG00000001166	Oas1c	0	0	0	0	0	0	0	0	0	0	0	0	0	0	0	0	0	0	0	0	0	0	0	0	0	0	0	0	0	0	0	0	0	0	0	0	0	0	0	0	0	15.5946715558582	0	0	0	0	0	0
ENSMUSG00000001168	Oas1h	0	0	0	0	0	0	0	0	0	0	0	0	0	0	0	0	0	0	0	0	0	0	0	0	0	0	0	0	0	0	0	0	0	0	0	0	0	0	0	0	0	0	0	0	0	0	0	0
ENSMUSG00000001173	Ocrl	0.0364566459932978	0	0	0	0	0	17.3246798809536	0.0736302646107485	0	0	14.1375729182314	0	0	3.87384157590888	0	0	0	6.74419255412733	0	0	0.934369247452204	0	0	0	0	0	0	0	0	7.71373086586685	0	0	0	0.365346580358581	17.1013902293014	0	11.0849330178423	4.89629062207386	0	0	0	0	10.9893555266849	0	0	0	0	20.710750450936
ENSMUSG00000001175	Calm1	228.102277314509	93.4445416613657	346.966640502583	185.920820764309	251.673253196753	191.257172442806	199.785087242801	242.960816338654	117.045909221331	161.958978403424	222.821336112793	232.286643612247	133.803397437898	225.195400433089	162.946416153961	159.512635430681	188.7493631291	149.234997479751	141.132684371433	123.3716490427	120.796420887831	127.030415269107	107.522187898636	211.123552527459	173.595843501769	153.553246820377	166.151295678671	189.343509079978	264.475230206152	171.361956710666	222.229506753219	229.244022093387	218.644597496079	130.349542296393	116.501555374602	186.331392487006	240.199851684649	173.583288124511	111.031017153679	238.801281853429	159.912917572715	342.695061400143	187.988527177529	250.054670055032	179.227214074582	291.339039004366	172.303706684538	191.947611801506
ENSMUSG00000001211	Agpat3	0	0.543665290593637	15.0493421993215	0	1.42454481513047	7.89299114757379	0	3.85540920079526	0	0	6.48775350014953	0	0	0	0	0	4.61372704014989	0	0	0	0	8.84948571554386	1.89150235215582	8.51573577900178	0	2.84490992833746	0	2.63287741302982	4.42508386840632	2.6064694988618	12.5725982601142	16.3622518547	5.12823456919412	8.3893169134267	3.61538537020292	0.87214039214145	0	0	0	0	0	0	6.32927857685643	6.33777455075095	0	0	0.459671327758276	0
ENSMUSG00000001225	Slc26a3	0	0	0	0	0	0	0	0	0	0	0	0	0	0	0	0	0	0	0	0	0	0	0	0	0	0	0	0	0	0	0	0	0	0	0	0	0	0	0	0	0	0	0	0	0	0	0	0
ENSMUSG00000001227	Sema6b	0	0	0	0	0	0	0	0	0	0	0	0	0	0	0	0	0	0	0	0	0	0	0	0	0	0	0	0	0	0	0	0	0	0	0	0	0	0	0	0	0	0	0	0	0	0	0	0
ENSMUSG00000001228	Uhrf1	51.4803450640516	47.234033611625	14.8010097191792	38.3675456610722	35.6097181266745	66.4503109388717	122.939887237694	143.49603283291	21.5896605977788	89.0258008257204	79.6086083583489	73.3738534861025	14.0926865661381	97.3027809501145	51.8014616574291	90.5643639840301	125.376751713945	26.3500873188606	72.4165602324037	54.8184382408409	80.217142583291	56.6215443276421	16.6359376692381	123.894829439568	66.8164960292186	40.3487090621872	13.3317693982783	23.7441328228565	117.978726660284	16.5510068396273	63.5877984996047	59.2863707585607	54.114744289047	39.7565411115377	157.560627955059	69.0191578923605	19.8769685883312	58.9275695020482	105.634036419177	32.7128037147245	45.5359609039397	34.5199167785886	33.7377531385542	29.3527765166406	79.4128545770474	137.725642193774	168.527685591284	52.2650987957094
ENSMUSG00000001229	Dpp9	0.118800324250231	7.33501468940594	5.08362679233605	0.13624865922906	2.94576168557709	0.374505123873494	1.23086083872964	10.9171347988454	3.79653950556989	1.78879912730644	5.46821854287861	18.7482630098871	27.903019048645	29.4857502012325	0	0.234600043383347	0.622517318708827	2.70109914906844	43.5375583531277	3.78442597348868	0.692001083767809	1.47452233421366	10.4466252173304	0	0.0569017956833563	2.74572235060045	0	3.42500680685608	3.83116208987954	2.17148070128401	11.4698799748161	14.2347122251165	7.30157630518159	17.0928303949939	9.99747409882404	13.7699912618389	4.59180291911096	6.71806944128335	0	18.8418926721459	11.5293031103504	22.0315584015955	0	0	5.94592831351052	0	0	13.2089705522394
ENSMUSG00000001240	Ramp2	0	0	0	0	1.62994928770769	0	0	11.2142394956591	0	9.69845554199942	0	0	0	0	0	0	0	0	0	0	0	0	3.79892703649927	0	0	0	1.79175520887822	0	0	1.04450667645139	0	0	0	0	0	0	0	9.1333826278944	0	19.2840284660699	0	0	0	3.84202558860339	0	0	0	0
ENSMUSG00000001247	Lsr	27.3859907686449	23.7236142420107	0	17.1649473386209	5.72850817658707	19.2739786182673	20.6755908376272	25.0826988156582	7.73417324175193	38.8914652087171	25.1008728410427	0	26.8065025688939	0.740961833872477	27.0011360303681	25.9082264485301	12.2367262506908	29.4546089173351	16.618884935042	16.9067894549195	47.1143139347528	20.6005228127157	39.5491566806013	21.990358580693	62.6873879311942	28.7703251123146	18.7894241331024	13.7709873132017	21.0988439867947	0	3.58688987487458	18.2969547433027	0	0.227945123735958	70.0206266035709	6.25596100808646	7.38493828592929	22.6971331853579	22.1211221915376	27.6488837201156	0	43.5143031452275	75.8839038845601	39.4139289405449	40.2755922920418	6.27415533436368	25.462283118986	10.5112648520058
ENSMUSG00000001248	Gramd1a	0	0.0673657920360825	0	0	0	0	0	7.73248483024595	4.72530394380592	17.4489765437651	9.57084370332255	0	11.2507224626561	6.39979442312075	20.3006114309706	0	2.36362106334597	0	1.83730829440281	13.7971875552143	29.3760866253854	0	0	5.13725989366356	0	6.24123096560597	13.8861199689705	6.95980659498285	23.4549368659718	7.53187426594353	0	9.71327496579968	0	6.70965325855497	0	0	0	5.2104095470652	6.04454894497811	0.0764183692054351	11.4364762477408	20.4742945910783	0	0	0	0	22.6313379076714	13.5894273221032
ENSMUSG00000001249	Hpn	0	11.1016558394386	0	0	0	0	0	0	0	0	0	0	0	0	0	0	0	6.10054059548309	0	0	0	0	0	0	0	0	0	0	0	0	0	0.709065350553168	0	0	0	0	0	1.98694425582946	0	0.0976239542226955	0	0	0	0	0	0	0	0
ENSMUSG00000001260	Gabrg1	0	27.000062200429	0	0	0	0	0	0	0	0	0	0	0	0	0	11.247493471476	0	0	0.662587135208264	0	0	0	0	0	0	0	0	0	0	0	0	0	0	0	0	0	0	0	0	0	0	0	0	0	0	0	0	0
ENSMUSG00000001270	Ckb	13.3791735115549	0	0	6.30207701648582	2.78780445529693	0	28.5487719501101	0	0	0	7.83527718621951	0	0	2.03834889290515	0.0803882822846719	0	0.104326304822187	11.2344774012777	0.277077091375253	8.01124552955225	0	0	0.974631462239697	0	0	0	0	10.2334099258311	0	3.57297050670057	13.1991883419268	8.70521612758574	24.0603021654799	0	0	15.6453049045064	0	19.7026627813804	0	0	0	0	0	43.3390060650185	0	3.06994038887991	0	10.6878380494106
ENSMUSG00000001280	Sp1	20.1888628866928	0	50.8344597771748	14.5784592416616	27.5082209439221	0	0	0	0	0	0	49.6290689635952	0	37.9546907614707	16.3815386483456	0	9.8679526089109	0	16.8135870664531	1.43937783793727	0	34.185559809236	11.9377232214789	0	15.9174656801682	12.4812457554082	0.426276320324829	41.3692510717889	25.8672533768932	12.2868697484676	8.33327921715179	7.68447976667963	3.5682435405456	12.5483995972612	12.9457866405986	35.5272456181988	0	16.2969167863132	16.7240031900151	9.37770427292715	22.2676602894421	1.89215348211079	0	10.5007619404552	5.78779489984515	0	5.01819369422598	0
ENSMUSG00000001281	Itgb7	0	0	0	0	0	0	0	0	0	0	0	0	0	0	0	0	0	0	0	0	0	0	0	0	0	0	0	0	0	0	0	0	0	0	0	0	0	0	0	0	0	0	0	0	0	0	0	0
ENSMUSG00000001285	Myg1	0.122503628725619	14.8772925089505	12.5265675596938	7.86776883913722	13.1033228360684	15.4471755663584	0.169230648319376	36.1228043762819	1.25276389664487	21.0416529821627	6.90737889424072	13.3180777130336	0	35.7257517293839	0.247315703734458	5.03179281148056	17.9738369158055	0	15.7699854636877	24.5097856278287	55.5159401513219	15.1127182653944	12.2159794210348	0	0	22.3931151690986	30.170034998548	4.13721964885461	17.0952761844985	28.9056646908242	70.0446388135774	1.03006624251454	31.5681482200235	59.2783285012472	21.5493873160405	0	27.7783202310265	62.0587514887945	8.12311713361362	46.3749055825004	31.9159743470866	23.9140393784308	3.49309813062073	61.1310483313129	58.4957047245319	6.296477099403	78.3621380580058	16.3874375795519
ENSMUSG00000001288	Rarg	0	0	0	0	0	0	0	0	0.968270026833054	0	11.3312493846641	0	0	0	0	3.39050445760381	0	1.30471353729146	0	0	0	0	0	0	0	0	0	0	0	0	0	5.42558376411345	0	10.9646652705426	1.09666982852785	3.41710364724976	4.22895103110042	8.92384102438664	0	0	0	0.547654199442769	0	8.81863954940708	0	0	0	0
ENSMUSG00000001289	Pfdn5	50.3608551005465	0.759532391270523	196.599265934628	23.3305792362231	36.9086611192894	64.1284950350437	27.7595320922909	112.23407358813	44.0800569181991	105.975631086806	132.459552703377	69.0213830808436	53.8850728348312	52.5296228079494	58.7653337011278	50.1657692768908	68.68135927539	25.6387753454357	153.925368023414	62.9448848449092	95.0850195043074	67.7412907659334	42.2806408128947	81.3073864882506	23.5272189328419	73.2351692738364	75.0990931260933	40.4611308325906	46.2566725482889	42.8722286050298	102.194381579538	96.3034349265108	85.605936794202	89.8561639992026	47.411171286112	198.523094360198	91.0932667335395	76.5744655310986	89.692682312219	53.7062707187807	259.987378212261	39.2808968680666	72.7601100263832	215.101263624785	125.507297644641	267.34688191453	118.162570723745	115.936639971149
ENSMUSG00000001300	Efnb2	4.99444881770238	0.0514849576188237	0	12.2659967275489	4.16976040200093	1.08143749468287	13.3111569597767	9.47578004071089	0.128977114523285	0	4.00561965099947	18.6358453515767	0	10.9169457764336	0.543192594518746	0	0	25.7560666648862	11.6429976460059	0	14.2816304194919	21.5930715379246	3.5672506765272	0.0552985989108462	0	0	0	11.386197266828	0	11.0096370561036	0	0.282798638718069	8.36799284993265	1.08336282003173	0.0547801644228169	7.6644876630654	6.23976113086833	1.36699156121518	1.8319123072085	5.08110251717766	29.9343554978275	0	0.616506159596269	9.05233992973446	0	7.08750935002384	9.86697040846559	10.5173176360965
ENSMUSG00000001305	Rrp15	13.559778781827	37.8099711063697	76.1867093369264	13.4696459313792	22.736981111461	9.15499107879104	97.7895565595284	27.8175094234595	32.4829997798076	0	21.2551039120816	43.68441967142	22.1923866075254	19.3780163703828	10.1309338953972	10.9638400021686	24.8967527653233	30.23428242001	67.979910553059	64.5629962547962	49.1320769475145	4.97955298443309	36.1998807283039	58.6338436747327	38.1501330400589	1.00950321175701	73.9551249621901	19.5243968497886	7.63763544822476	30.75223148884	3.89427429805993	85.4377775288252	30.8343217768001	68.1732561606999	46.0267541728956	48.2437153627612	85.1498508405096	36.7296982217	25.7907983742282	49.4419063003735	23.5052430585497	44.0011433618364	70.8924982008115	85.4432989892786	51.7049626660317	53.23157210888	63.6298904050204	20.9603581369891
ENSMUSG00000001313	Rnd2	0	0	0	0	0	0	0	0	0	0	0	0	0	0.26957606418275	0	0	0	0	22.371190434166	0	0	0	0	0	0	0	0	0	0	0	0	0	0	0	0	22.7603807530382	0.44779692789052	11.8746378593739	0	0	0	0	16.2816488530562	9.55969331757271	26.3284381354131	0	0	0
ENSMUSG00000001323	Srr	0	0	0	0	0	6.40722419692234	0	0	0	10.0658888383869	0.349078600401746	0	1.81279191348774	0	0.204143927380812	2.75564503590268	0	0	1.31930621633447	5.50992736667944	0	0	1.23752547508067	0	0	0	0	0	11.650551694711	0	12.8543705064741	4.1450001133817	0	0	0	0	10.8458183554536	0	0	0	0	0	0	0	0	0	0	0
ENSMUSG00000001333	Sync	0	0	0	0	0	0	0	0	0	0	0	0	0	0	0	0	0	0	0	0	0	0	0	0	0	0	0	0	0	0	0	0	0	0	0	0	0	0	0	0	0	0	0	0	0	0	0	0
ENSMUSG00000001334	Fndc5	0	12.1347417753596	0	0	0	0	0	0	0	0	0	0	0	0	0	0	0	0	0	0	0	0	0	17.835449301267	0	0	0	10.1037081003701	0	4.85290058566823	0	0	0	0	0	0	0	0	0	36.0798419220236	9.4566234957399	0	0	0	0	0	0	0
ENSMUSG00000001348	Acp5	0	0	0	0	0	13.3185091166376	0	26.1491174617806	0	0	0	0	0	0	0	11.0343841489048	0	21.3034226237242	0	0	0	0	0	0	10.6075598721441	0	0	0.841958745792376	0	4.52928280980762	0	0	30.2758221250642	0	0	0	0	0	0	0	0	0	0	0	1.61310319856749	0	0	0
ENSMUSG00000001349	Cnn1	0	0	0	0	0	0	0.174611886040058	0	0	0	0	18.4698511011551	0	0	0	0	0	0	0	0	0	0	0	0	0	0	0	0.416465948820303	0	0.420067804454929	0	0	0	0	0	0	0	7.29668240615266	0	0	0	0	0	0	0.170979505696115	0	0	0
ENSMUSG00000001366	Fbxo9	16.1601749482441	0.682428716359077	1.11484854064489	0.766909146662828	0	27.8255255285797	21.5544108375069	0	0	65.8815950533461	0	0	0	0	0.374998513074646	0	0	29.9468828108273	19.5170585093837	0	12.2046422530274	0	26.7738350715701	0	18.1495273153868	0	0	0	0	0	0	34.3609915445311	0	0	27.9550964435555	0	0	0	22.8741982172772	0	0	12.8119549459714	0	0.291941588047967	0	0	0	2.32343578457756
ENSMUSG00000001376	Vps50	0	0.0325100759466688	0	18.2673105663132	0.123905273552024	0.0401689173027171	0	0	0	0.0355304065312171	0	0	22.9760092639608	0	0	0	15.4128276955572	0	0	7.0856647718661	0	0.0239629224162924	24.8933827448676	0	0	19.5107904116475	0	0	0	0	5.57027118530503	0	18.6825472011611	2.69074352583967	0.17295413924024	0	11.6560847350132	2.6270822011835	0	0	0	0.0690957720925552	0	0.0417232289845635	0	0	8.06297307696853	12.4244654897266
ENSMUSG00000001380	Hars	95.5507958716356	59.6800569623977	32.3052971319534	27.5458172562554	37.74041140901	50.47658089321	100.019656771781	59.4057275422686	9.78914878774863	19.4120832059835	77.5070442502478	70.5994116824474	0	9.98937373214691	44.2726226406338	126.617008336608	15.656033821542	78.6038142294003	9.08309463485434	8.94864592493267	47.0401928459746	71.6141885787342	47.6491942695042	78.2181566023547	89.5312383742249	47.90485917099	50.6028822630192	45.1594128499358	45.1060134225977	28.7278177210726	17.9238761854399	71.4651871973858	139.447308054057	84.4679507638528	54.0504055137721	82.5169757769181	89.02189404664	91.4497343570167	44.7892758395664	97.7214799142567	95.7894844824389	41.5256201318801	139.666414298673	120.588405017638	157.50284426476	5.06918692295671	53.2630624112863	45.5061229890705
ENSMUSG00000001383	Zmat2	157.208358543919	48.6313861640932	268.909228530483	166.239421921551	133.05142613701	49.6548329301029	103.718067745123	81.3886174105708	95.7783652432276	242.163286756845	20.2765638071196	140.248968988184	107.965026739839	79.2681429489788	39.0794972371083	152.741862042822	170.081228744774	116.706751160138	63.9720302683405	47.9538888366198	47.8390129817713	201.243701427434	84.5925699137994	104.131402406286	115.515788332614	178.193642469809	207.809706158354	78.5044771793089	52.8269831398069	90.6408424067283	96.9792948257122	59.2655481260314	121.857836570498	63.175844448957	81.8586040506237	134.053297929237	122.592593158579	104.157299354261	85.6359276171456	190.865254684797	46.3068687970392	7.64394556590426	181.004788062236	18.0617029894009	47.4639713854084	87.6803266938311	96.9557329680664	125.111578148935
ENSMUSG00000001403	Ube2c	42.9624466450971	31.2206763191224	232.842549532189	10.6782266504252	76.1801074674975	2.01264815186906	24.6218877336732	16.1182313099437	120.038752453908	14.5386050552629	0	53.3322917728518	58.7490088351045	13.9272326235954	0.537055562801827	12.6077672545648	33.8035284099722	3.84897184339633	10.026727244142	76.2678277534076	131.556805112772	0.200108835193285	87.5406482218601	21.8695324346452	71.8627659693209	42.4792048921288	33.8951156819825	75.5981804635501	21.057192082396	184.772963242027	0.142687267549956	55.5479068448927	143.603464385316	238.408155600244	83.1916860077708	40.7638419286914	139.322541485814	108.280475955216	51.869004011385	175.540635901805	88.4527598933112	0	42.2614972403242	94.4221063962232	213.028890100051	29.8528087892503	0	226.80266816066
ENSMUSG00000001415	Smg5	5.22022902655325	4.51562898482694	12.2120292597639	1.25440434651343	1.88540505813506	7.64821729170101	9.4778407976384	17.5718690004418	0	0	26.0875531387067	10.0543964140397	10.2820204888824	0	15.4234904536676	0	0.651289503580145	4.26460262365958	0	0	4.51766480960757	9.27473957250073	5.9041612180866	0	0	5.17072885734483	19.3865028658367	13.7189487511047	3.67300072742578	14.0992050663745	4.90666969493236	9.89358190463468	0	6.47697090233747	4.64268981198724	1.62784494316223	9.92833254800393	1.23000018873123	0	7.65487726042948	14.6689025296747	16.1753242201721	4.05036392949245	0.260464274788051	6.99413347740014	18.7391703438529	13.9563745599294	0.0431858661559815
ENSMUSG00000001416	Cct3	208.853898077575	168.818812323631	76.150903144703	133.742453907366	113.553522859629	130.753672451357	155.696128343301	95.5032617072175	77.1712393644829	67.394699818857	144.436339953983	95.5138919713715	109.965731783547	94.9115112126499	78.1835989384973	129.465473950786	34.5645167415242	132.806360835556	107.476442108323	158.74339611164	60.8435597790853	195.085695044556	50.8894306299001	103.962103845783	115.402719413752	133.403410637338	55.5246656014944	107.192451092061	200.799346418373	123.590938209929	120.614420855493	85.5168433004511	151.880935149555	201.069928453358	145.196373750807	39.7470567558669	155.560575477296	113.65628386687	52.4561355944272	115.392985147051	220.862275197834	164.033666665406	162.323071556243	82.4122458869061	161.196364371764	62.2262940645223	102.184783818868	132.940360245127
ENSMUSG00000001418	Glmp	9.07035093661576	3.75874563025933	7.57629952279298	0.126091192820153	2.6726983978715	0.762487907903555	9.1887319257475	14.2111677527401	19.6053517323109	0.122625367446477	0.695826680819885	7.71136100910031	24.1089184339445	13.217411698803	0	3.38692205694078	3.26461236167474	6.13570005691629	12.1767916301454	10.2611053355189	12.6801526199308	13.9767639777348	0	9.70125181703226	17.3250455762417	0	0	2.71685940861313	9.28288232530781	1.88780113933393	0	13.4046150176344	0	8.02732069511349	19.3399842292743	0	4.81607695772891	19.7526610229913	0.520733920752804	0.127278917904077	20.7666910814889	9.89645640636666	55.3096477420658	16.415832338144	0	14.7865623467573	25.1080615758858	3.29481180475115
ENSMUSG00000001419	Mef2d	0	0	0	0	0	0	0	0	0	0	0	0	0	0	0	0	0	0	3.95373037530077	0	0	0	0.209528122764981	4.8769483635934	0	13.6582326770299	0	0	0	4.48072324751924	3.84313910259865	0	30.2079523483706	0	0	0	0	0	0	17.1246606657347	0	0	0	0	0	0.0989972422813404	6.98019423632937	0
ENSMUSG00000001420	Tmem79	0	0	0	0	0	0	0	0	0.759047149774309	0	0	2.49890996436728	1.11080058721836	11.8823611669564	0	0	0	1.3500857869056	0	0	0	0	10.3353775940803	0	0	0	0	0	0	0.657798484998102	0	7.48938101635957	0	0	0	0	0	0	0	0	2.08848513110344	0	0	0	0	0	0	0
ENSMUSG00000001424	Snd1	9.21545694496566	5.60664698103317	29.7824640582322	3.57718013092034	2.96402444072323	8.31297740292336	13.4160341228179	14.5317933883166	9.96773528812982	20.8731324448014	7.58620748479925	7.62379118232894	19.5965801977986	9.92419538527448	5.08047847151877	3.55563932514885	6.77907132200378	8.71807704612677	15.9901481929742	18.1049468830593	23.37109721521	10.8514486728264	16.7083484592901	6.79897322111549	15.1092142296282	18.5433920904049	2.66723064013845	11.8826609162844	2.03666599956517	6.98904654135444	27.9466401852994	7.69910381274767	9.92101796549774	26.7414182857048	5.19575009336736	12.4873008311047	16.7592257018696	19.5005128092863	2.6860199614274	18.6698683510925	21.4004262335636	18.5277228802566	4.33140281237309	22.050835562345	2.01369242170257	13.238154342701	11.0916194978016	4.03325980655037
ENSMUSG00000001435	Col18a1	3.30016505352404	12.6171877942937	4.16073211545052	0	10.3455697312009	0	0	0	0	0	8.3886257598323	0	0	2.17761095002488	3.24839190528191	3.92963927390294	2.45198763569766	0	0	0	0	10.0781205133664	0	0	0	0	0	0.649167261627887	0	0	0	15.0481219809819	0	3.66686142361971	6.204257391502	0	0	15.261676095999	6.06568611891847	18.0191488762938	0	0.213674320420675	0	16.5153863704948	10.527330659217	0	0	3.12338194040928
ENSMUSG00000001436	Slc19a1	2.23402935331022	5.39577654992885	12.4152132558897	0	0	0	0.205744237814642	0.300799608138484	17.705608347397	0	6.8552903438069	4.09142996175666	0	23.218718758066	0	12.2937495085603	1.30070909758929	21.3950169835646	0	37.6221476645144	1.21454832764312	0	0	0	7.20488968589978	0	0	19.4447628662379	0	5.19711795279121	0	1.98283315567587	0	0	0	6.1444206180198	0	3.07058617313179	4.11490806563868	0	0	0	39.7376983812983	21.0673197142521	6.14465882486194	44.6542793429884	0	6.72732386693039
ENSMUSG00000001440	Kpnb1	110.045641721155	53.8230700150867	73.3170528102801	122.175764710479	67.4088684836228	80.7298929910049	56.6181292686757	69.5277069353565	40.7186524184119	95.3467031851915	78.9860519925723	130.236901094859	89.3333138719782	52.6280791704636	85.0378722202752	92.6865398471644	101.973422112901	127.830420825392	41.3241141048401	78.2470142841268	103.624694612064	76.4239630370955	93.3383402327913	70.9825066902537	131.457222372554	68.0859790095767	128.433529963422	101.798433942143	142.71031747496	110.396113766591	105.328752917074	111.270053236263	120.77480272151	116.073531035767	89.3493575905412	76.4279079829789	129.002208759186	107.821786325228	99.2557572168983	101.395127576644	104.28354526561	143.760390807261	126.549349348872	98.0813205604117	68.9987146604254	47.6516240331602	128.417567377593	33.1398244888
ENSMUSG00000001441	Npepps	0	10.2852027116538	23.256661261091	2.97217204258296	13.5799560802492	3.08628394090385	2.32040441398778	6.10640736554903	12.3308189100389	0	4.47320537900323	19.1306442419665	1.44640096199797	8.89627198764626	29.7767970013077	15.6940982894041	11.9871011106892	16.4169995659712	9.79574795986117	5.41781880056765	9.00141104442251	12.5269352700098	0	21.1472248132956	23.4003146717273	13.9656661130852	26.3472307269879	11.819865388417	7.14742326415964	1.96707854475813	8.59767021512502	20.4457999999083	26.5820261747054	14.2908876243319	7.50410711976839	0	28.7516574537533	17.583753540603	0	3.72243145016755	6.47045888337422	12.9076962292202	0	1.00571162665872	6.36197514616819	2.96002578711319	0.66256631385641	0.792064503835572
ENSMUSG00000001444	Tbx21	0	0	0	0	0	0	0	0	0	0	0	0	0	0	0	0	0	0	0	0	0	0	0	0	0	0	0	0	0	0	0	0	0	0	0	0	0	0	0	0	0	0	0	0	0	0	0	0
ENSMUSG00000001445	Mrpl10	51.6311912719952	19.0102478758123	54.6856707164927	46.9070310873478	12.009961157864	0.2553125095072	97.8971557798359	63.7934681822128	76.0938545950796	70.6848730701437	0	46.8648032661666	21.4633381224269	11.9352119282785	10.7641698477259	0	22.6341659923359	30.7602257976346	0	18.5576656543756	87.9832380279085	13.2507665458785	18.7222823630471	24.1913563309073	33.167017279926	29.7794253449997	15.5829202285021	25.0172168319456	2.84926876993128	23.9999394788816	45.1787320205013	38.022591564294	63.8708173724459	29.8565405747737	57.8227407096849	30.7611609662256	21.912685733659	26.9547950359103	0.63933198584229	0	41.2776976245775	0	52.7856327748	91.4911264522631	26.2932043607253	0	21.8968856664243	24.0953871442611
ENSMUSG00000001467	Cyp51	22.0107805286004	0	11.1438279292186	27.8487321800443	0	0.296312864941085	10.4961716104061	18.6676986254841	22.2286141169513	15.3763045121878	0	0	0	25.0913340735988	46.4921033075557	43.7440501459814	0	0	26.1626042701055	0	1.64255822365869	45.3111670538453	0	0	0	19.2557878765357	0	0	56.0323923370328	9.7185517142116	5.71395445137763	0	28.0734246454493	27.4742283453799	20.5833210787441	12.8236573325442	0	10.8892195967438	11.1300241068717	72.9980630113603	13.7750140470514	7.47555218138579	36.3745616111511	0	0.529784742451383	71.3950621446509	88.8563706614232	47.9008432676396
ENSMUSG00000001472	Tcf25	47.3508116869403	2.61914199982958	14.1912106638342	10.1546454337995	3.18185983922631	0	36.340005433079	17.8825646073216	10.9081975851203	3.86433711286757	2.2887639588493	35.1015716553201	6.40128892513023	10.3509206388241	42.4861766194247	0.050680573379512	17.2025173108147	4.97316134019537	0.744098496782337	53.9295051566371	24.8158007944181	26.4002583870028	21.928002419302	30.1006996824653	0	0	2.41411589571715	9.77729149605216	47.4767117850324	11.7276072753947	60.638117820024	9.89073810414471	4.84609750248593	42.8042881038213	54.2027875877779	30.2514596873405	38.6866637182745	31.3692971536177	1.51945134297583	0.297110082573116	24.2798702379594	0	4.44307639508665	22.9414903641564	3.38482322371026	0	18.6017643804518	17.0542988504987
ENSMUSG00000001473	Tubb6	43.8927643073479	24.1044542613798	27.1272056334039	56.4342411803917	39.4271234823903	29.5348765978129	111.209385978424	0.79505599328123	24.908842881518	177.382025833089	40.3158961829951	99.8590528124669	0.204556460505905	0	28.2129928552127	108.676513984282	19.596363335496	28.2750309822635	57.0673149922708	0	97.2239073028562	174.118604008818	0	60.8413628574536	0	65.7554118204103	86.8504642961188	100.520705506952	0	38.5936398783907	56.1653467487476	30.6179422586472	138.46263272668	224.019330085275	0.641180467475942	108.012709594142	68.9765284941891	80.6961730454894	74.2694902119103	259.992037097871	72.8174671179238	42.2653764836887	216.478927241274	114.719169815656	0	11.1283155018646	132.47272442254	130.111026448803
ENSMUSG00000001482	Def8	7.374729565764	10.8088627278584	13.6031080705004	8.63781880978133	0	1.18713366489555	0	3.16904124363684	0	17.9383414535147	0.541673690278572	15.3159648027786	18.2638105826651	8.03224144050872	0	6.38301586277306	3.90549119560645	0.0810808821042136	0	30.3411384966221	0	0	16.2869732065214	20.2951377826653	12.0247642275318	0	0	1.55097663698596	14.9043646318229	0	48.5615786702459	0	0	6.96370284545803	6.0484981681958	2.36329997065916	12.0284471975674	0	0	2.72474480218199	32.0905419835449	4.76472405885431	0	0	0	0	14.2612589138798	0
ENSMUSG00000001493	Meox1	0	0	0	0	0	0	0.214424650002513	25.0792348329465	83.1359677522287	52.6293987271451	0.357225856784552	0	1.45181836175039	12.0389669596875	0	0	34.4318948495956	0	100.807311610763	92.818801296445	64.5553151059936	14.244731266452	237.521945163298	19.0556787701038	0	31.3084945817447	37.4307152681996	0	33.3101003816876	25.7923140257784	0	0	53.1015906235276	0	0	131.529053101253	0	0	65.9206372439883	8.80495331108458	103.322451845406	0	27.1879769798615	0	22.2561904506125	109.564353663454	49.2874397333634	89.6618440360726
ENSMUSG00000001494	Sost	0	0	0	0	10.0916227347783	0	0	0	0	0	0	0	2.78339361942981	0	0	0	0	0	0.582384931895953	23.0129425975364	0	0	0	0	4.16908935923573	0	0	0	0.981476092901464	0	0	0	0	0	0	0	0	0.197203736523635	0	0.387566153211301	0	0	0	0	0	0	0.96290191546654	0
ENSMUSG00000001496	Nkx2-1	0	0	0	0	0	0	0	0	0	0	0	0	0	0	0	0	0	0	0	0	0	0	0	0	0	0	0	0	0	0	0	0	0	0	0	0	0	0	0	0	0	0	0	0	0	0	0	0
ENSMUSG00000001497	Pax9	0	0	0	1.88268914722686	4.7887819806673	0	0	0	0	0	0	0	0	0	0	0	0	0	0	0	0	0	0	0	0	0	0	0	0	0	0	0	0	0	0	0	0	0	0	0	0	0	0	0	0	0	0	0
ENSMUSG00000001504	Irx2	0	0	18.5043419803688	0	0	0	0.29112621584741	0	0	0	0	0	0	0	93.2456311811623	0	0	0.108898393758493	0	0	0	0	0.19104598030902	0	0	0	0	0	0	21.1277978723291	0	0	0	0	0	0	0	0	0	0	0	0	0	0	0	0	0	0.732238598369304
ENSMUSG00000001506	Col1a1	0	0	0	0	0	0	0	0	0	0.470172900567292	0	0	0	0	0	0	0	0.21782997307047	0	0	0	0	0	0.115517871562959	0	0	0	0	0	0.291864877085856	0	0	0	0	0	0	0	0	0	0	0	0	0	0	0	0.361114426362226	0	0
ENSMUSG00000001507	Itga3	0.121130558281059	0	0	5.55684549234035	1.7078964028346	0	16.5660504029262	0	0	0	0	0	0	0	0	0	0	0	0	0	0	0	0	0	0	0	0	0	0	1.20767654604765	0	0	0	0	0	0	0	0	0	0	0	0	0	0	0	0	0	0
ENSMUSG00000001508	Sgca	0	0	0	0	0	0	0	0	0	0	0	0	0	0	0	0	0	0	0	0	0	0	0	0	0	0	0	0	0	0	0	0	0	0	0	0	0	0	0	0	0	0	0	0	0	0	0	0
ENSMUSG00000001510	Dlx3	0	0	1.91671462647889	14.6051036875781	0	0	0.18325205991776	0	0	0	0	0	0	0	0	0	0	0	0	0	0	0	16.7155339710423	0	0	0	0	0.218536792476477	0	0	0	0	0	0	1.58446424944477	0	0	0	0	5.83564318302893	30.6722980739816	0	15.1300591066242	0	0	0	0	0
ENSMUSG00000001517	Foxm1	17.4296221287457	0	0	0	7.53909970493654	0.833648145398204	6.39308919983162	9.22535774199072	41.0262214207942	0	0	0	2.74832305331777	0	4.52990904553042	0	23.2003643356661	0	20.2834732571798	45.5467293415029	0	0	0	11.9242289001785	0	0.947103725779448	0.205581645620682	11.1390527499904	0.0704806954443665	0	0	1.17918775450874	6.31974024285353	0	0	0.31486380047651	0	14.0197667869743	0	0.13915739877208	0	8.734262777731	0	59.9049272688107	0	0	4.287105740561	6.26487768469254
ENSMUSG00000001518	Itfg2	0.0974711792255983	0	0	3.1300326145553	10.141444089335	0	0.0673249887550168	14.4691563478497	16.8205532987191	0	0.953374193318185	0	0	0	0	1.23187504178385	7.36334059690251	0	0	0	18.3386723510692	5.09578164027996	0	6.30361945786279	0	16.0765251707476	0.250052872512979	0.0802882494343538	0	0.485895791849782	1.72527727674552	3.14173107197607	22.7356661709323	8.0236940539413	0	7.53183851244141	9.04176209528659	4.24877340116677	2.92384464551212	8.6886695018546	10.3164136711151	0	9.92613144502166	0	14.7670777591522	0.166995066249668	9.25151166751377	2.70936536623231
ENSMUSG00000001520	Nrip2	5.52293442468602	0	0	0	0	0	8.01104646605078	0	0	0	0	0	0	0	0	0	0	0	0	0	0	0	0	0	0	0	0	0	0	0	0	0	0	0	0	0	0	0.108443683699183	0	0	0.0599539496818109	0	0	0	0.373542662431119	0	0	0
ENSMUSG00000001521	Tulp3	0	2.87118745667467	0	0	3.34767061176171	7.51529398034316	0.460248670718304	4.56067845171818	0	0	0	2.33680983180395	0.346248266964233	10.0492254711671	0.473320216984412	0.233927031055936	7.20953730449923	1.37728141932707	0.515181875100423	2.60674198227965	0.172503973868387	2.45048712760777	2.61758760303939	0.933274844495672	0.0354615986371763	4.47233287936572	1.32954680833491	2.10399560271066	1.30233115474273	4.38791443266214	0	1.40071146561587	1.42542450917085	1.37791875697035	8.6021042392785	0	6.5340867293295	0.697791341738951	0.116889213425244	2.65703937578367	5.18391164902924	0	11.912717769163	13.5273300477351	11.5673071368054	15.7923490974526	2.21465379110257	0.0321559500086713
ENSMUSG00000001524	Gtf2h4	0	14.5944236864938	0	0	0.304508523169507	0	0	0	0	0.465702497196369	0	9.88400729642885	0	0	0	11.8732972635804	0	0	0	22.7515262228116	0	0	6.90792970696	11.2131137224019	18.6989983657137	0	17.4955999565858	0.601883176260673	9.18078603049091	28.7933466882164	0	13.0194714374208	0	17.3351131347787	0	4.37482959961808	9.95209411427074	8.60839250710779	0.329604295749662	21.7519017591637	0	0.905648900497168	0.425208745752332	26.1131748887946	1.69441567492148	28.972157017422	0	15.595820168045
ENSMUSG00000001525	Tubb5	1008.89813111507	721.982984896516	2135.60923336559	921.512298596957	539.845407645401	592.048452689626	701.314391068274	856.118539891149	1123.17696556099	454.120159743742	957.614828160707	433.309302018885	860.434748822418	536.456367723673	346.602886262696	836.172488912101	1002.02828790383	680.432907228608	1044.4432202374	725.101396643941	1352.02556079825	966.597248829938	1122.10244980644	477.856185713547	938.085398060639	527.218455034877	914.831649487017	307.552404780033	1006.24634286136	349.017634492406	618.980540319055	984.442079135163	866.079310213132	1383.20554174123	497.19173713754	433.599961736907	1210.92122719451	1205.85917940206	557.969448179042	1429.70474622527	664.02839424898	588.449252117221	532.238273029632	514.620100143454	719.346086421	615.649924076064	416.168118039764	385.997530295704
ENSMUSG00000001542	Ell2	0	0	0	0	0	0	0	0	0	0	0	1.27516393243433	0	0	0	0	0	0	0	0	0	3.54690263437833	0	4.31990764141141	0	0	0	0	0.866551114501891	5.76913634250188	0	0	0.104225883384005	0	2.21612185316115	3.73295255757247	0	0	0	0	8.50291340070645	0	0	0	0	0	0	0
ENSMUSG00000001552	Jup	0	0	0.0597226541955164	0	0	0	0	0	0	7.0119665811744	0	0	0	0.250057349777971	0	0	0	0	0	0	18.0283270539543	0	0	0	0	0	0	0.0442608311052031	0	0.476198679506395	0	0	0	0	0	0	0	0	0.339334689813123	0	0	0	0.218880760515456	0	0	0.368240208237304	0	0
ENSMUSG00000001555	Fkbp10	0	0	18.0728280516264	21.3512558189081	0	0	0	19.9899018630988	0	72.281073702416	0	7.85120332245955	0	21.4765326090397	0	1.11687205662243	0	16.1958440429113	0	0	0	2.03858745222461	0	4.1329814845258	46.2779299257531	0	0	0	0	1.82740229208877	0	8.5865760440752	0	0	0	0	0	0	0	0	0	32.9687828064547	0	0	0.159386687422341	21.1967093630839	0	11.565689949865
ENSMUSG00000001558	Klhl10	0	0	0	0	0	0	0	0	0	0	0	0	0	0	0	0	0	0	0	0	0	0	0	0	0	0	0	0	0	0	0	0	0	0	0	0	0	0	0	0	0	0	0	0	0	0	0	0
ENSMUSG00000001566	Mnx1	0	0	0	0	0	0	0	0	0	0	0	0	0	0	0	0	0	0	0	0	0	0	0	0	0	0	0	0	0	0	0	0	0	0	0	0	0	8.87276580588163	0	0	0	0	0	0	0	0	0	0
ENSMUSG00000001569	Nom1	1.53584678288446	0.191144597312086	0.041635073917065	4.21021934657146	9.2884664934087	7.1797240541834	10.6601010357835	1.74008924092763	11.0134189565174	12.7848501463047	0	2.40844297547819	18.6866049103401	0.522975228500115	0.201667311277405	16.0965717114894	2.35547822542642	21.0215185090173	0.0434433589434228	0	5.19314132207372	0	0.0339586713265925	25.3344193613936	7.60743478632172	1.57412906936307	14.9274053192172	0	0	7.63547856693811	0	0	6.32440673398898	25.9561151903356	20.744605050952	22.8133864057884	2.22006774150228	3.30986990623237	0	4.3366100115606	6.73398710479414	4.87502405873123	4.42512788839328	23.9426254811453	18.1910933711938	0	0.474066484638054	0.520625450573669
ENSMUSG00000001576	Ergic1	16.1771961981895	14.322722852073	14.5271841056648	3.93179526161876	6.14636178215346	59.7777700001383	5.54993169383828	20.3391972952821	31.2242087009018	10.8737132870394	35.1965960572355	18.0342647242565	7.23710364686395	10.8853445123608	0	8.16627634286012	12.9586165940961	2.76800285250444	9.81550746328645	0.059873388599891	27.6451646095943	1.97443197054093	21.0266874917155	11.6258109225066	15.3428429501366	9.51041189224294	0	5.47134075513365	2.07295777762813	9.96919280163667	32.0648525033265	10.584744355876	36.9686108708543	0.460127145682621	7.61971213638657	2.80626751539938	40.4425270670888	2.90295141020139	1.60684646875418	20.9603891973883	0.0697791167765066	10.8053971918867	22.2566745069861	3.29747933259786	16.4483555702754	34.9662215947191	19.5977386505121	6.70039148656522
ENSMUSG00000001583	Tnk1	0	0	0	0	0	0	0	0	0	0	0	0	0	0	0	0	0	0	0	0	0	0	0	0	0	0	0	0	0	0	0	0	0	0	0	0	0	0	0	0	0	0	0	0	0	0	0	0
ENSMUSG00000001588	Acap1	0	0	0	0	0	0	0	0	0	0	0	0	0	0	0	0	0	0	0	0	0	0	0	0	0	0	0	0	0	0	0	0	0	0	0	0	0	0	0	0	0	0	0	0	0	0	0	0
ENSMUSG00000001604	Tcea3	43.4754878036189	0	54.0870539094727	36.8289857943236	0.24019922315728	0	0	47.8941730352613	51.1537055175902	27.0002665312025	13.0754870036197	0	42.6152474171951	73.5711590021038	27.926889265695	18.7315399210676	27.3979506160354	0	0	14.3572964526047	34.2450576324176	17.280827267763	49.2652998651161	29.784220363374	42.1201723538522	2.85457062949926	20.278573524024	0	0	17.2395826948303	15.6344477444023	49.5031442112442	4.38999420813431	25.4621215930886	20.1170371670577	11.6468119796261	0	7.27540927960411	43.6791612727452	27.452971629756	0	29.4683597150163	75.4669593577218	7.11774444631519	118.954838728648	42.321321075273	37.5135581672444	69.9504917884345
ENSMUSG00000001622	Csn3	0	17.340461087022	0	0	0	0	0.345186503038728	0	0.21294270714285	0	0	0	0	0	0	17.3690820559033	0	0	0.193193203162659	0	0	0	0	0	0	0	0	0	0	0	0	0	0	0	0	0	0	13.4433863181895	0	0	0	0	0	0	0	0	0	0
ENSMUSG00000001627	Ifrd1	0	0	5.4460780470117	38.8630577308066	26.2915230263654	14.9625856971488	0	6.31925649968773	11.0932317897231	14.2882939991	15.9641783966589	10.7657602834969	0.736235645835864	21.291585096578	24.6708180180901	7.92738296135999	0.515576395459598	2.92854512788288	2.25935130800058	5.80671705675638	0	0.976973828359158	0	17.2776026130997	38.4554341137898	21.7687700942912	0	28.3987405346471	12.530524378154	1.37335926782533	0	2.81290025290288	45.4636932901129	15.128427580583	28.4619330898897	15.6956487074169	13.9189319929917	40.6866520996638	24.6058778081358	0	0	0	0	10.7476416807857	0	0	34.8425844425584	0
ENSMUSG00000001630	Stk38l	0	7.30448111315178	0	1.13784382340596	0.275638452803437	0.357437513310079	0.783177246238687	9.1600877389844	0	3.31970490137735	0.652376400750804	2.23672924679432	1.25202805714157	2.96809875584819	0.143068080254585	4.14230604470331	9.09787375238815	20.6532944641261	0.493117733318458	2.05944826164412	0.247673994448536	4.31792220201904	0.192729377266661	2.79643201623333	5.43085663063116	39.9788785256621	0.363601471998382	35.7245856360183	11.5514104714297	1.57008949861842	6.76594953095488	0	3.67332165639654	15.9283194619788	2.61631412336597	0	6.57380572009771	5.84418122460002	0.111883097522401	21.4124740298686	4.01567377849324	24.5935639946485	0	3.15578088342589	0	0	11.7404578466786	0.369345350386484
ENSMUSG00000001632	Brpf1	3.5710196301032	0.156186480812968	0	9.24412683706966	0	0.514617219340076	0	0	0	0	0	0.536718233975329	0	0	0	0	3.60879139242939	11.9152416874575	0	0	0	0.076749221345706	1.9886085718462	19.1800649311271	0.977377945031718	0	0	0	25.6644343355618	3.22124277132099	11.65661731364	0	12.1638478452263	0.219101700289644	0.720126029287406	10.9574832018905	5.58672741943365	8.77470810887198	0	0	0.132908682079695	12.9461768866947	25.7679385248572	0.0668162522284144	0	15.4701628004907	0.821683876765133	9.88189959444824
ENSMUSG00000001642	Akr1b3	7.67222809685003	7.87187439136519	5.22647307655859	4.54144862995182	8.94444149209243	3.79692091309586	10.3707464071349	2.58255694096188	6.85460136017563	1.93227098267193	19.6981256977655	3.18245403858988	9.51670630321686	8.15818068759165	1.55445471421649	6.02768770817991	5.07937452253015	7.4601374588729	7.6539902627038	2.35134451775354	3.07544298450091	7.10548666949438	9.68489641041979	9.99223388752159	4.50455355551158	8.45005401905466	4.09167305321334	6.14982709061889	15.4788519689651	2.65027511741984	18.761741859145	19.0182000211017	28.1617988820957	12.2829360950544	9.09233772722295	4.53795950223981	17.6437544321749	15.3561119527522	7.87985823294694	4.15445583912844	12.3584941458849	6.79960416741355	10.2494884369425	4.59214298399282	15.34410544916	13.4273275358094	13.8571508670642	6.59276751389615
ENSMUSG00000001655	Hoxc13	0	0	0	0	0	0	0	0	0	0	0	0	0	0	0	0	0	0	0	0	0	0	0	0	0	0	0	0	0	0	0	0	0	0	0	0	0	0	0	0	0	0	0	0	0	0	0	0
ENSMUSG00000001656	Hoxc11	0	0	0	0	0	0	0	0	0	0	0	0	0	0	0	0	0	0	0	0	0	0	0	0	0	0	0	0	0	0	0	0	0	0	0	0	0	0	0	0	0	0	0	0	0	0	0	0
ENSMUSG00000001657	Hoxc8	0	0	0	0	0	0	0	0	0	0	0	0	0	0	0	0	0	0	0	0	0	0	0	0	0	0	0	0	0	0	0	0	0	0	0	0	0	0	0	0	0	0	0	0	0	0	0	0
ENSMUSG00000001661	Hoxc6	0	0	0	0	0	0	0	0	0	0	0	0	0	0	0	0	0	0	0	0	0	0	0	0	0	0	0	0	0	0	0	0	0	0	0	0	0	0	0	0	0	0	0	0	0	0	0	0
ENSMUSG00000001663	Gstt1	0	0	0	0	0	0	0	0	0	0	0	0	0	33.3529809775844	0	0	11.4642865462654	0	0	0	0	0	0	0	0	0	0	5.40642575968556	37.9535777401339	0	0	31.0833274712715	0	0	0	0	19.8284948567229	0	0	0	0	0	0	0	0	0	0	0.196597437814795
ENSMUSG00000001665	Gstt3	0	0	0	0	0	0	6.83904128352628	0	0	0	9.63282488667182	0	0	0	0	2.48851904425948	0	0	0	0	0	0	0	0	0	0	0	6.67299422420038	0	9.17370355673772	0	0	0	7.73186062604633	16.5181016613772	0	10.0894172469659	0	0	0	0.820785488121782	0	0	14.5009180073763	0	0	0	0
ENSMUSG00000001666	Ddt	37.5802464255673	16.893127070699	87.5161713102361	46.1782486823044	30.0171344851142	32.155504108128	51.2965898797733	35.2390826828006	25.7349388114943	44.4099745199967	37.5812692437688	63.8042798318942	13.4835256560897	43.3745446089645	43.9556471840392	37.812428311987	21.4894642759544	23.5803763830324	16.0842713877569	18.0019838096148	27.6232867288354	31.6342815790678	30.8234029498315	21.0867936713526	0	27.2599241579842	18.3635206556492	23.2164950408338	4.19711173699234	28.2494239932536	80.1485272576855	38.2450403535427	52.3429667334686	24.9790110497096	35.4628925997981	12.8906787757828	71.4737192278555	37.948835983653	57.2123554833824	48.6849270493193	57.9872584760131	34.9336782226702	127.56812448567	91.4098193034951	55.6760586517213	90.4460833329251	42.2062456152697	63.7331761149873
ENSMUSG00000001670	Tat	0	0	0	0	0	0	0	0	0	0	0	0	0	0	0	0	0	0	0	0	0	0	0	0	0	0	0	0	0	0	0	0	0	0	0	0	0	0	0	0	0	0	0	0	0	0	0	0
ENSMUSG00000001672	Marveld3	0	0	0	0	0	0	0	0	0	0	0	0	0	0	0	0	0	0	0	0	0	0	0	0	0	0	0	1.56136685806199	0	0	0	0	0	0	0	0	0	0	0	0	0	0	0	0	0	0	0	0
ENSMUSG00000001674	Ddx18	47.9116970998765	14.4981060075142	61.6114582988855	24.2795878962547	68.2579830285047	37.9347295640242	16.5467089559732	62.7288932306709	20.1183261309815	25.6316896475945	65.3900276354652	19.3749109977237	2.46069146953317	30.6793412069117	58.7668128929748	33.0046263208501	24.3273985066639	16.6971104649953	25.1980579957495	9.49621361452061	6.97703194993701	7.01952458531418	43.1813158119166	36.9453881269399	58.9717102195237	41.261834457083	19.2944542692335	34.9911905931903	21.2327707637113	11.8803227950233	11.355217103452	91.7372930078343	31.3528919147195	81.5523941927468	42.3459716444441	25.9026516036791	50.0647064708207	32.1606493165262	71.0248141919891	38.2135856606299	36.2862648335986	60.117050610358	36.3100526698987	39.5850101195503	41.825043867811	32.6912178100579	19.3888037245122	20.9300656873597
ENSMUSG00000001687	Ubl3	0	0	0	0	0.0415261684885395	0	7.49231183824538	12.9375776135631	0	0	0	0.099843936997304	0	0	0	7.69108054304148	0	25.3334402634014	0	2.33892161561421	17.3630745626571	17.8289114092313	13.7434911161918	13.200577246301	0	0.538368470055317	0	0.281415370701988	7.6121239912579	5.67698450476011	12.8732177910593	0	7.21004235220873	2.99576977389114	12.2885005169645	7.49479270388387	8.85833895572015	4.88022020336003	0	0.0988777071541799	0	3.98301545801204	18.7875265578127	3.41192761240327	0	0	0.0491320167289175	8.30943421039091
ENSMUSG00000001700	Gramd3	0	17.4771173119147	0.29510556806322	0	14.4580568871638	18.7486609668673	0	0	0	0	17.109541535238	0	0.413902918743425	0	0	0	0	0	0	0	0	39.9449498274503	0	0	0	0	0	7.10789868888701	27.2439678609232	0	0	0	0	0	0	29.7317849000052	0	0	0	0	14.699419624674	35.9934597810355	48.6696705262851	0	22.0880580011141	0	0	31.9428196313777
ENSMUSG00000001707	Eef1e1	36.6320453309444	29.9074332562671	48.0321234196358	20.4581315009681	47.5973529707426	18.4765673137504	69.5265179543918	72.2689298627196	43.4332512155783	14.3297173133712	0	34.6302733041699	55.0639990338742	32.7770393543172	62.2360059114225	43.7807330823234	30.6939391969103	37.9680585806323	32.5091310095607	64.6809073553848	19.1731255143663	45.526756794051	28.7806047443794	56.2148374402364	16.0708001860679	50.4193009279909	28.1473905863858	73.3803539592263	37.7280977098023	19.6432320815792	31.4376368418325	44.4916192704403	13.6808232154017	25.0816620953308	61.6831883660882	55.2084237222068	42.271232565115	58.0424423460955	49.6201709269749	39.8266168101311	22.268814996429	22.8002046305929	34.6015738330359	76.4878893524813	96.2314864850054	18.555371966684	41.9004536427619	53.8637141015991
ENSMUSG00000001729	Akt1	5.31653193392451	1.29183522868608	1.6883235830264	0	0	1.06411363162103	0	0	4.42284808715736	3.29432241717941	0	0	0	8.31258646911988	0	0	0	0	20.0632414353256	0	0	10.7916184913899	7.03821223504476	16.6503028785	0	1.59579351043483	0	4.37929494059651	9.30241987046539	8.88108213225354	0	0	41.9931119958187	0	0.824710162046288	0	4.02285112256942	2.18723870972969	2.53143016160981	17.6828712455775	9.06924186859516	0	0	22.6584215813973	0	0	11.4565120628481	1.17286826737338
ENSMUSG00000001739	Cldn15	0	0	0	0	0	0	0	0	0	0	0	0	0	0	0	0	0	0	0	0	0	0	0	0	0	0	0	0	0	0	0	0	0	0	0	0	0	0	0	0	0	0	0	0	0	0	0	0
ENSMUSG00000001741	Il16	0	0	0	0	0	0	0	0	0	0	1.5685235522184	0	0	0	0	0	0	0	0	0	0	0	0	0	0	0	0	0	0	0	0	0	0	0	0	0	0	0	0	0	0	0	0	0	0	0	0	0
ENSMUSG00000001750	Tcirg1	0	0	0	0	0	0	0	0	0	0	0	0	0	0	0	0	0	0	0	0	0	10.7664820724799	0	0	0	0	0	0	0	0	0	0	0	0	0	0	0	0	0	0	0	0	0	0	0	0	0	0
ENSMUSG00000001751	Naglu	0	0	0	0	0	0	0	0	0	0	0	0	0	0	0	0	0	0	0	0	0	0	0	0	0	0	0	0	0	0	0	0	0	0	0	0	11.3987735669949	0	0	0	0	0	0	0	0	0	0	0
ENSMUSG00000001755	Ppat	0	14.648969917254	6.30122954757941	0	0	0.456303208480952	28.32768762991	0.73085806428067	7.86380260253102	0	0	0	14.1656240757945	43.9718334199732	0	2.85840555126163	0	0	0	0	78.1314842061765	0	0	1.71884710217651	0	0.506883835659569	0	13.4134864715964	5.3752162610051	40.8891392831691	0	0	24.1166406620563	0	0	6.4772217148252	2.64195501753336	0	0	32.8160521530553	47.6106296848502	55.2047021582003	0	16.1146257877066	0	0.413322982248917	0	0
ENSMUSG00000001761	Smo	2.33792105815906	4.20677259561669	23.6601584826919	3.66913930703099	6.87992793601177	13.5763937185024	9.68904922672804	7.70402326739882	18.7177435130398	12.2831415586582	0	8.19899724298836	0	16.081284106287	23.5166831271345	9.13638829690928	22.6209533331716	0	0	30.1202023481218	28.0964504785786	16.0592591275024	12.5491820102469	23.4011648728422	0.412555734082815	0.969513402977219	24.3065093609877	12.3148262382708	4.90608835935033	11.5182726498896	20.9220505096377	16.5543611606108	19.4078199736946	2.11391628004056	3.27350708571466	4.59297276074919	4.99380011115766	36.0236952623984	22.3407914355351	64.5298679342022	10.1383184852348	35.4968127892872	9.27281858442742	13.3764924497716	0	43.1118812447987	25.2695201058649	22.6062220862775
ENSMUSG00000001763	Tspan33	0	0	0	0	0	0	5.88551293419795	0	0	0	0	0	0	0	0	0	0	0	3.86014523354841	0	0	0	0	0	0	0	0	0	0	0	0.0714122994475237	0	0	0	0	0	0	0	0	0	0.0433584194330247	0	0	0	0	0.114051683359735	0.153174618468055	0
ENSMUSG00000001767	Crnkl1	28.3391621555966	32.9608868437191	0	68.7171743268777	32.9805280911583	0.794098949965681	56.7966495665866	33.0694894895307	3.33506835089182	15.0514344421004	79.7141507369024	37.019347429119	0	0	13.7430711570256	88.1188033921192	0.0785704090687389	67.5014795933822	54.9852784356173	11.1618699908687	5.86926371860006	0	25.5274505733775	9.17109424678671	11.4621591686552	45.3663670188133	0	18.155921879112	48.9524733653264	55.5118947914236	18.6265532925515	49.4228141270581	3.19770649916131	56.5420132786747	29.4045073263895	0.35348458141425	0.115909974831183	45.1514473918407	1.98851540653757	0.208301683801912	5.6253150207175	0	26.385950410192	7.42343510742834	9.49229821841742	29.9023694173885	0.621026646416401	3.67295566964291
ENSMUSG00000001768	Rin2	20.3051296191698	0	0.14238748005273	0	0	0	0	0	0	0	19.5326255197939	0	1.79736135023886	0	0	20.0866477745288	0	0	0	0	0	64.1801183590836	12.7167833594139	0	0.920398928880813	0	0	0	0	17.1008599512424	0	0	0	0	0	0	0	15.6207713223135	0.10112789700117	0	0	24.3134187481823	0	0	0	0	20.5604795221978	8.84677546063718
ENSMUSG00000001773	Folh1	0	0	0	0	0	0	0	0	0	0	0	0	0	0	0	0	0	0	0	0	0	0	0	0	0	0	0	0	0	0	0	0	0	0	0	0	0	0	0	0	0	0	0	0	0	0	0	0
ENSMUSG00000001774	Chordc1	10.7465809985242	23.1583431798749	0	74.1612464011925	43.3242770602702	36.9889190887646	63.078252734535	0.372609597277973	63.439091569849	2.00626909026578	39.5402047640975	23.6155545739014	60.7317982535268	13.9873592811387	39.8529894829203	65.9421986974101	65.6172524483487	29.4579885968126	9.57473553855116	40.2627058017471	2.74033536669119	66.4752049479107	21.4913733255762	28.7665922324301	113.505483026084	67.108955728789	44.7261816022336	38.5996948969027	60.0368062098483	45.3202627376617	10.5388381927402	55.5229471247739	67.0091807309911	38.3637297794564	50.1325080215428	53.9434380165398	64.5934228212736	26.7884101615511	73.4005644220579	33.1049104408789	45.3918645385897	12.605103551805	16.5333500362254	9.54463657899634	47.7283201656704	24.9705954170456	0	57.2115849230299
ENSMUSG00000001783	Rtcb	39.0130724467551	24.4283818701123	41.3037765487796	75.2288505238368	41.022169430991	32.8514462519864	68.5092906604588	5.87611746927202	8.11446075769437	27.1403935631863	110.482375845698	113.164149086166	50.7153742673708	32.1053237280133	111.511766252122	57.140747576297	76.690007355103	110.706565176081	12.1164275684469	73.7609008809358	97.9860832492074	30.1425889799751	20.2610289380957	88.5709094344867	72.2106634979141	90.3062497077811	78.7103331812022	44.4451186497819	70.2532705464087	88.0474969160229	137.470861133981	53.1906118388478	50.1393857296155	133.666671885536	25.130269501232	39.3175785757932	134.774888379195	40.6643908339173	89.3627200035132	89.1040522782232	57.0223734944248	117.320234818831	179.927853132802	107.217753123183	165.295270779405	30.134722692986	31.9514053571176	93.279357018959
ENSMUSG00000001785	Pwp1	0	14.5154505512309	0.2613018371192	69.2938821774702	28.9186148342314	97.5311142708359	38.81013281072	99.2368784706935	31.7051569225104	16.7817525298335	0	68.019275984545	0.122163732531908	39.6598436369473	96.5069252893381	26.926853925736	55.3335444174253	84.9169834440674	38.3074147600802	4.86134469124173	25.7450747186568	57.3867519553278	44.116815712597	10.6944144559176	0	35.1947865141278	0	23.9160738005753	1.65416419410014	16.6679249561015	77.2994449425968	0.164733571415055	0	0	34.3352648860817	69.8949476381369	60.4274708895907	46.8079357050804	50.4789763179245	51.3032461838078	110.326618315271	82.0983657346848	57.4595475735204	65.1246564042373	50.2463552402191	0	138.21354012343	36.146129600026
ENSMUSG00000001786	Fbxo7	0	0	0	0	2.61187504792383	0	0	0	0	8.80036426467764	11.7839445980279	0	7.26953278941898	0	1.73225041292067	5.56945058332715	0	0	0.389387465791922	0	0	0.042094091545513	5.47875355958043	12.5130528622825	0	0	0	4.28676892174063	0	9.48456005864448	14.2271673566801	0	14.1715832447054	0	0	0	11.0308034494196	4.68074875335047	0	0	0	3.03440008833648	0	0	11.0515840497326	0	0	0
ENSMUSG00000001794	Capns1	1.39615560715552	0.42744778095725	36.1563890027235	0	12.2184505925787	30.6325536235219	1.35008754196173	65.1366553946453	58.8949494587905	10.9003902023425	32.1315788823569	24.4813141442521	23.6508394351015	48.5128083851848	0.939540077570146	0	0.975453055987832	8.51306708542877	48.7370997252602	3.90131809447816	17.4035059805205	15.7534206147318	51.7659021227391	50.8081830105928	81.3159510362731	10.2671091015865	10.7451060760119	1.26503423452723	29.306709714999	19.6422823509034	1.64749933465028	2.34790230328506	49.4177116822009	32.5800483758512	21.830680623759	29.0739284379039	0.179878055410201	43.9168024015505	12.3437274488985	20.365294860588	17.7324032483407	59.6570162542775	0	0.365722546513057	40.4154963678233	60.5176097087675	55.5766615780734	47.418952776574
ENSMUSG00000001802	Lrp3	0	0	0	0	0	0	8.53829831856816	13.6719181891437	0	0	0	0	0	0	0	0	0	2.88965363318813	0	0.246729317106955	0	0	0.800442009413878	0	0	0	13.0875900048666	2.42436348079223	13.2881004094426	0	0	0	0	0	10.3067713826117	0	0	6.24137238624761	0	0	0.0479248912669284	17.0768289567096	0	0	0	4.79041336426495	0	8.82028130369766
ENSMUSG00000001804	Dsg4	0	0	0	0	0	0	0	0	0	0	0	0	0	0	0	0	0	0	0	0	0	0	0	0	0	0	0	0	0	0	0	0	0	0	0	0	0	0	0	0	0	0	0	0	0	0	0	0
ENSMUSG00000001815	Evx2	0	0	0	0	0	0	0	0	0	0	0	0	0	0	0	0	0	0	0	0	0	0	0	0	0	0	0	0	0	0	0	0	0	0	0	0	0	0	0	0	0	0	0	0	0	0	0	0
ENSMUSG00000001819	Hoxd13	0	0	0	0	0	0	0	0	0	0	0	0	0	0	0	0	0	0	0	0	0	0	0	48.2427382153431	0	0	8.33710986942188	0	0	0	0	0	0	0	0	0	0	0	0	0	0	0	0	0	0	0	0	0
ENSMUSG00000001823	Hoxd12	0	0	0	0	0	0	0	0	0	0	0	0	0	0	0	0	0	0	0	0	0	0	0	0	0	0	0	0	0	0	0	0	0	0	0	0	0	0	0	0	0	0	0	0	0	0	0	0
ENSMUSG00000001827	Folr1	0	0	0	0	0	0	0	0	0	0	0	0	0	0	0	0	0	0	0	0	0	0	0	0	0	0	0	0	0	0	0	0	0	0	0	0	0	0	0	0	0	0	0	0	0	0	0	0
ENSMUSG00000001829	Clpb	3.47216610333758	7.47671687998541	7.91133288077113	13.3003041067545	0	0	0	0	10.5191131753783	0	0	0	1.80424548749435	3.36631756854715	0.303756325681087	4.99162940500338	0.545827685169095	5.81320618344283	0	0	0	0	3.27356136380107	4.41489356244244	10.3775164050374	0	0	2.05924849874521	0	0	0	8.66134716308736	2.93107043012983	2.73396832143549	4.14728744809489	23.6925051816691	10.3784581158883	11.2082208821532	4.82400375502206	0.04019636910314	0.293997073936679	18.5266576959686	18.5283003295933	23.8297614358197	15.1236522773325	3.1528534375354	0	12.6976679294181
ENSMUSG00000001833	Sept7	59.942286276943	81.624971562482	88.6663340594522	16.2999128942953	86.7947119839582	173.477200273803	66.5407750608779	33.3885237463884	46.1795123321036	97.5321909039469	84.2020442413477	88.3891136268592	46.2274033925609	51.611613402355	80.7561151780766	76.9878476751816	93.7676055398417	128.814356693152	150.586253547135	26.6867599717238	16.9036986598894	43.0326041256508	83.7742290481914	108.986021723429	11.8203194570052	50.2591491391347	88.5331497496922	72.3974007207949	55.3001316857364	78.4912457355927	40.0299676739323	35.7515614628537	49.9351933398821	32.8191591049539	29.7030852849228	34.3855715310946	35.8944022720531	53.8746840713389	30.8882384548474	34.3870243685846	11.2129659190691	53.2057049278087	39.7265098868723	26.2476597007332	31.4118943722423	39.5304644623649	29.1108487508923	44.4751374720397
ENSMUSG00000001844	Zdhhc4	0	4.43626321270018	0	10.8017975095083	0	0	20.8510003581354	17.3150925268599	13.5831275427769	0	0	0	0	0	0	23.4634774674686	11.1782867181511	24.8336246978908	35.9897891305096	31.5820417777269	0	0	0.109464543885161	0.132357505423831	0	0	0	10.6425662926887	0	0	25.3887679970173	20.4756236799839	0	0	0	22.6149495492042	10.4233178065019	3.41415854461869	1.71574917708933	0	2.04483998352606	4.45243119107027	6.39431406103602	0	12.2503472656574	15.929603393556	0	0
ENSMUSG00000001847	Rac1	7.61497923606536	59.2663890747692	28.7255339873638	13.4088560379005	35.6772778524092	46.6529095997822	96.4826986536219	73.946927154457	35.7902886677925	108.268735264291	55.4969755327313	28.5037784666282	43.0871158580256	16.9432393720555	66.3594899885473	45.9331022308209	37.8202578592328	23.9276608147081	52.9882204895048	118.645192078567	40.4137559980645	99.1731553775973	47.8348370172047	64.6681814667401	42.5892222159238	12.4443025663224	91.6918373959383	52.0178567800989	104.814137207287	41.5822279313818	54.3773052090958	54.6520477582889	60.033691554743	39.0923859225639	55.8766815262936	52.6875477676591	40.3340931724164	23.289077035601	34.8529784399407	50.0444795334093	1.60318141604671	22.0226175806172	43.239076357983	53.293852484441	74.3943390175641	22.271406953758	45.4861500747282	55.9910902166557
ENSMUSG00000001855	Nup214	8.73609788898966	0.365389154650622	30.8009371425007	0.0821244118471462	0.243705599641924	0	0.0494604120722227	8.38813293832871	1.1441895124458	5.91016438646113	4.40838675608293	9.29159523762942	0.0372094110269049	0.166618604738691	0.409598230939034	5.91077468865867	0	0.111006686504413	0.622842566154383	0	1.79355733840911	2.90871523564936	0.129829776865971	1.80529114758848	5.24756029958387	0.7146568790735	0	0.353903355204167	19.7335731593163	7.02029457152214	1.07543566390276	0.200702419340756	0	4.15186266788637	11.4299927500582	14.2552230462346	0.507416645176699	0.0843613044120157	12.7749902262662	0	3.28810699271078	0	0.291689941956201	0.0468938165292909	4.94001372953994	11.2255124334661	0.247150474047484	9.54789022561023
ENSMUSG00000001864	Aif1l	1.80118616610637	20.4825089205423	0.285993305358887	22.0344359453218	9.42448340860163	20.9817238715847	0	42.9606297480642	14.1435785574613	15.01928091482	0	29.8789419813544	30.2178900485884	73.310381601127	45.1941846375645	12.9402637620223	13.4832434134032	0	14.1249530621841	0	16.087343250523	0	2.41039188102683	21.5296289874136	27.278201508815	26.4011740670228	0	24.7276657112055	71.1113508338114	4.56073616265351	28.0632448331139	15.8663923753988	0	1.71908614150868	13.5044925427008	24.9381969471161	11.2715551120062	13.035108292624	7.31235958807119	22.9370531194793	26.2006046179787	62.5086418197316	0	3.59482042743191	0	49.6687726508413	127.097703386497	21.6062144455585
ENSMUSG00000001865	Cpa3	0	0	0	0	0	0	0	0	0	0	0	0	0	0	0	0	0	0	0	0	0	0	0	0	0	0	0	0	0	0	0	0	0	0	0	0	0	0	0	0	0	0	0	0	0	0	0	0
ENSMUSG00000001870	Ltbp1	0	0	0	6.88786375542693	0	0	0	0	0	0	0	0	2.29772728762353	0	0	3.02361848280592	0	0	0	0	0	7.64537954307169	0	0	0	0	6.37736627604286	0	4.25668429146539	0	1.20358344002062	0	0	0	0	2.67955703941779	0.425150709209033	5.87031115155843	11.5137102114464	12.1482019020032	5.02936979154273	0	0	0	0.0446373976702835	0	0	0
ENSMUSG00000001891	Ugp2	0	43.1243138412801	0	0	0	0	0	0	0	141.140898917937	0	0	0	0.0873992127278712	0	0	19.2886386061276	37.6154000149448	78.5410631962116	0	7.22012600303976	39.5001408797954	13.2798432646866	23.4681199581074	0	0	0	52.4429555493953	0	20.9713615924947	17.4070097656251	0	0	11.9378181322362	0	112.458084608315	0	10.6203432950884	0	41.2226928186571	0	0	16.9835494503312	0.147587935437087	4.4203968393459	0.193059138173289	57.6906571536313	7.14541042802656
ENSMUSG00000001901	Kcnh6	0	0	0	0	0	0	0	0	0	0	0	0	0	0	0	0	0	2.4169367933415	0	0	0	0	0	0	1.1201428722519	0	0	0	0	0	0	0	0	0	5.39628610398391	0	0	0	0	0	0	0	0	0	0	0	0	0
ENSMUSG00000001909	Trmt1	9.48750391585619	0	0	9.056970816726	3.14628224433736	0	0	10.3007409100972	2.59380831288561	6.2390176842523	7.32035428435251	12.8858053094384	27.6422082203939	4.72142854561749	8.89414884373679	2.94567772836326	9.81843541933835	11.3353799021685	3.1164581983061	1.83892767269694	15.0138776209737	0	11.8820238552517	14.0063037836009	0	9.56379514885719	0	3.52351590571849	13.4410240424451	2.36932630333855	16.0019720284378	0	6.01019399464418	23.3180704408637	21.3186574228339	4.0940532648543	0	8.528357975711	5.54128274947609	0.825345047807575	21.7174388335513	0	22.7860911222807	4.95613206408073	2.07713256777165	0	29.7172969652291	4.47790726105529
ENSMUSG00000001910	Nacc1	2.0106264179792	3.69344704685271	0	4.24290999133173	3.67560671715094	2.02825007552696	17.3318945935055	7.79672584294951	5.14033790730881	17.8506745505292	2.03602123211065	4.23071268385902	2.92539524158386	0.124757294819459	5.30394408534518	1.01644015075561	3.09048481587215	5.98444791597835	2.14525327083968	3.50585145935697	29.0450557210655	5.26332773496756	13.196434445899	1.76312509550628	13.0201630244597	6.4212751581125	0	2.11990853204158	4.99858926607091	1.33640175928917	11.3021589133756	7.10062989011505	8.69491100913423	6.56291118581546	0	0.210665849760679	0	10.0434487171465	9.39609864588124	0.465530042171249	5.18591904802367	24.7708664327494	0	17.2752021656868	13.9252071467035	1.65348417224323	0	9.71063325868837
ENSMUSG00000001911	Nfix	0	0	0	0	0	0	0	0	0	0	0	0	0	0	0	0	0	0	0	0	0	0	0	0	0	0	0	0	0	0	0	0	0	0	0	0	0	0	0	0.108925543808264	0	0	0	0	0	0	0	0
ENSMUSG00000001918	Slc1a5	32.7347133566995	16.576601811047	40.5283970901105	20.719656517959	19.0179303453548	8.15091151847284	46.1367031974255	13.2226404307949	17.1615594834954	36.9727383947177	9.059480571174	21.7004683925394	18.6033145074328	7.52041636995804	0	12.3066471643727	13.0276629386153	1.45599735954022	18.6454357571392	2.77888279511787	32.3426348849322	0	0.901528263658095	4.72363732752462	0	0	0	4.16406068741393	0	0	23.29225177451	2.32277099018975	25.1603230636342	15.660862390509	29.9658526313037	8.68308798438456	35.234632464139	21.6745478466423	12.2988292584413	4.31728076492388	0	44.0391581476182	0	48.4099038437488	17.8241525247896	11.2167220487064	0	6.69477169979239
ENSMUSG00000001924	Uba1	94.9429560426801	22.923199282281	39.8811996682241	15.8022433341009	27.8429728274864	20.7223267210147	35.1934079005992	70.7297914022846	13.2097830761802	25.2129486180558	25.6821595738608	40.1835277717572	55.413661739758	45.919952622124	12.1215487405573	6.97233860415337	10.6545322511391	39.6786517220844	17.6440437913102	119.516179546241	98.2335674184067	12.9018084861078	12.490815336776	46.9611790067875	29.2853787930237	45.9130886964679	18.5329357879344	16.6696999244762	1.34648988283672	24.4854463582012	80.3715125622745	35.0988819919026	39.9614883994242	12.5340964241646	21.2733806605781	71.6193944102345	17.9369663811386	62.9015671768885	34.4429991360099	18.4434520961475	15.938830303695	46.2296740912063	27.4785968084006	119.839780383261	43.2950337627555	88.155513789913	40.2081784200596	65.2665960936116
ENSMUSG00000001930	Vwf	0	0	0	0	0	0	0	0	0	0	0	0	0	0	0	0	0	0	0	0	0	0	0	0	0	0	0	0	0	0	0	0	0	0	0	0	0	0	0	0	0	0	0	0	0	0	0	0
ENSMUSG00000001942	Siae	0	0	0	0.151136456898463	0	0	0.0455118719830046	0	0	0	2.08509366916162	0	0	0	15.1868146033796	3.30497979379607	0	0.102144763736889	0	0	7.75291723881709	0	0	0	0	0	0	0	0	0	0	0	0	0	0	0	0	10.4407702570216	0	0	0	0	0	0	0	0	0	0
ENSMUSG00000001943	Vsig2	0	0	0	0	0	0	0	0	0	0	0	0	0	0	0	0	0	0	0	0	0	0	0	0	0	0	0	0	0	0	0	0	0	0	0	0	0	0	0	0	0	0	0	0	0	0	0	0
ENSMUSG00000001946	Esam	0	0	0	0	0	0	0	0	0	0	0	0	0	0	0	0	0	0	0	0	0	0	0	0	0	0	0	0	0	0	0	0	0	0	0	0	0	0	0	0	0	0	0	0	0	0	0	0
ENSMUSG00000001948	Spa17	20.8604859652357	0	0	0	0	89.5985683694144	0	0	0	0	0	0	0	0	0	15.7052457318094	17.9336033034822	21.5588028390046	0	0	4.5566412550758	0	0	0	0	0	12.2639817887987	0	0	0	0	2.28391219181475	0	0	0	0	0	0	0	0	0	0	0	0	0	0	19.1248111640052	14.1564978784641
ENSMUSG00000001962	Fam50a	47.6117741809935	2.15953294697487	0.167996067483542	0	0	0	1.67041300771189	0	27.8225282535456	4.21457706843195	2.43500632098421	37.1050267436353	19.7924468267999	0	0	14.0882247730932	15.9724575820315	6.24833091460444	6.83640493918772	47.9799377147966	28.3497237701524	17.9643158866699	7.26216872614354	0	28.9582390269668	35.5687122302514	0	13.8198254799968	6.91271457250372	12.7254106915997	15.7280283549383	22.6648338636498	27.0857014444184	4.54415777265931	1.47712510667207	16.4306472420425	0	4.62980590520261	17.4201200443095	22.7474906970042	0	0	0	0	49.274380484214	38.5849107355855	0	15.2301147979881
ENSMUSG00000001964	Emd	0.549587197286329	0	0.152711562337046	0	7.8825807837868	25.6412067553707	0	3.05245275767706	1.40506653962196	0	0	23.2891834051657	0	1.70506592840262	0	0.108529316851637	4.07979268321331	0	0	0	14.5658942464185	0	0	19.4279994135347	36.4581583185438	14.0011807521941	13.8641419438186	0	0	10.9588129963164	3.39002725446459	11.5529479643168	0	0	4.17739561355402	0	20.888294518723	0.971210773916162	24.5120442184158	61.8746207024115	2.59521759224566	0	5.03712720385271	0	0	0.470797373900534	0	0
ENSMUSG00000001983	Taco1	0	15.8218523771339	0	0	8.02400875623019	0	31.4346846989946	0	0	0	0	0	0	0	0	9.28337646726809	0	0	3.76999144392902	0	0	0	31.5093254248064	0	0	0	6.84261338482373	0	0	17.7285015259763	0	0	0	0.357987569598337	24.9802302927648	0	0	8.54321378892051	0	0	0	14.1017326447984	0	0	0	36.4153088066341	0	0
ENSMUSG00000001985	Grik3	1.31039154043713	1.14063882200313	0	0	3.63524512479201	6.07480450014344	0	0	0	0	0	3.51419947290344	0.200270645887036	0	0	0	0	6.09415945974057	0	0	0	0	0	0	0	0	0	0.253973216532341	0	0	0	0	0	0	0	0	0.148966213056191	3.04216378213246	0	0	11.2209299078	0	0	12.0644625378006	0	5.01837575215541	0	0.133913244168509
ENSMUSG00000001986	Gria3	0	2.72062412214776	0	0	0	0	0	0	0	0	0	0	0	0	0	0	1.16410759645895	2.79137323057955	0	0	0	0	0	0	6.95561686529868	0	0	1.47357725516254	0	0	0	0	0	0	0	0	0	0	0	0.0406081586638883	0	0	0	0	0	0	0	0
ENSMUSG00000001988	Npas1	0	0	0	0	0	0	0	0	0	0.128188133367528	0	0	0	0	0	0	0	0	0	0	0	0	0	0	0	0	0	0	0	0	0	0	0	0	0	3.61261477156897	0	0	0	3.59242525065351	0	0	0	0	0	0	0	0
ENSMUSG00000001995	Sipa1l2	7.62352934441027	0	0	0	0	0	0	0	0	0	0	0	0	0	0	0	0	0	0	0	0	0	8.41059218584511	0.591252826557945	0	0	0	0	0	2.1909744277279	0	0	0	0	0	0	0	0	0	0	0	0	0	0	0	0	0	6.27852530739133
ENSMUSG00000001998	Ap4e1	0	0	0.117545872294295	0	0	7.02341030230896	20.6484162046049	0	0	0	0	0	0	0.273423225139487	7.40162202760521	0	0	0	0	3.23103903544072	6.89952591262955	0	0	0	0	9.92526086727941	0	0	0	9.72399159817134	0.0378172166799068	4.0510688789453	0.0522085617685018	0.706560175592558	0	0	12.4901564112175	0.0415313883443252	0	0	0.0918438283199035	2.2938951126507	0.861600351484694	0	0	0	0	25.6611561278373
ENSMUSG00000001999	Blvra	5.51401554039431	25.3947553834662	0	0	0	0	0	0	18.6153365424945	0	0	0	0	0	2.66405321422547	0	0.24695392678678	0	0	0	0	0	0	10.5383846673352	0	16.0414435137251	0	0	0	7.36131903931155	0	0	16.7511362534424	0	0	0	0	0	0	0	8.01164678620074	0	59.8963711228362	0	0	0	0	0
ENSMUSG00000002006	Pdzd4	0	0	0	0	0	0.439369033993246	0	0	0	0	0	0	0	0	2.22758562572714	0	0	0	0	0	0	0	0	0	0	0	0	0	0	0	0	0	0	2.74360951954635	0	0	0	8.82578616891017	0	0	0	0	0	0	0	0	0	0
ENSMUSG00000002007	Srpk3	0	0	0	0	0	0	0	0	0	0	0	0	0	0	0	0	0	0	0	0	0	0	0	0	0	0	0	0	0	0	0	0	0	0	0	0	0	0	0	0	0	0	0	0	0	0	0	0
ENSMUSG00000002010	Idh3g	70.9324583918557	57.3624582693147	104.454369405154	16.1526039140086	45.9411028074976	31.8054542572915	74.817928488326	89.4727933260851	59.9027308294898	27.2758814590346	68.2157226449647	21.253635811957	28.0764912750731	71.0044988749401	33.4309300107666	7.98974266965198	36.7886377857891	29.5080376950494	30.4402678274581	49.8026004023369	43.2566008815955	72.4273962550742	87.1689547275135	42.9455757250494	77.7611807971231	50.171881886322	28.2481054735803	9.70283940294855	23.7231601668744	78.5777186468877	95.0473645967719	118.784066131894	165.349405445217	134.909756106372	0	53.9962857420652	111.843126813855	68.7837287537839	68.1223498191186	0.889350247169066	50.4533240716441	127.748131375386	0	20.6266297609551	53.8636717803782	92.5710347696087	101.787823171531	0
ENSMUSG00000002012	Pnck	0	0	0	0	0	0	0	0	0	0	0	0	0	0	0	0	0	0	0	0	0	0	0	0	0	0	0	0	0	0	0	0	0	0	0	0	0	0	0	0	0	0	0	0	0	0	0	0
ENSMUSG00000002014	Ssr4	17.8722348264818	23.7110180785606	45.563832649115	25.621437145723	10.8617219773964	3.94381959130243	7.5611007396881	2.25599706103863	18.4195441678566	21.9271267510688	15.1673298856728	16.7139266522825	24.4943807926268	3.55211742194293	23.9789989119205	5.29395911851879	5.46297820987501	25.6278440846295	42.3609794423053	30.3390991675122	21.992000075538	0	20.0498313404542	4.65269122425269	42.8013248667313	17.1327882508118	0	26.9589062451468	11.5271450580252	17.9424310274935	21.5690055598771	0	4.46656387455526	21.2686936577353	13.9485055292691	7.31478645002357	47.6355553023589	10.3961274718891	40.0321770385706	25.2162106176093	4.65626850552069	30.0429131226617	14.5603780328421	10.679960688475	23.1180196771445	12.8221573542009	19.0196765431765	42.4985748132045
ENSMUSG00000002015	Bcap31	91.9181206079942	187.900878199833	121.398175492127	482.841552888791	161.104909641831	206.052903489138	103.072293366754	66.4651157106784	188.94009866684	354.392341672879	120.788641221868	211.585765689524	309.873168060235	486.507395011092	517.376742617128	91.2054915831311	390.724263273	212.566269916855	214.517675576065	156.329368517508	410.484597591687	116.092672886539	105.187973386403	222.343236510831	241.871375288733	168.689817795153	232.895840308725	424.84036501184	46.90892120078	133.567088602732	268.425301021788	95.8160182705864	101.676923551812	311.92317401432	265.542690218268	326.601194561295	132.314992171359	147.394181763005	30.4571674174187	156.989409135158	264.050818060764	318.747922519648	295.84203701184	309.148658776491	183.435902695181	669.780907452147	0	163.630998873986
ENSMUSG00000002017	Fam98a	0	20.5934650902094	0	33.9731860910337	18.9452908405742	0	22.9325283341003	22.6862908827319	0	32.0415432493636	0	29.1667988865832	0	49.4976987753088	0	5.02522868439105	0	0	0	3.33322158782032	33.8148447953805	0	0	0	0	0	9.18044073019196	0.327522516807229	0.932557451191457	15.9671648350445	0	15.6022910938621	3.97484385042342	19.7811027355204	9.82240312382159	0	18.6983212746927	9.01740868457974	34.9973159091053	20.9441684968795	0.45321325745385	0	0	0	32.0024095329485	19.4150124852359	0	18.0465032943462
ENSMUSG00000002020	Ltbp2	0	0	0	0	0	0	0	0	0	0	0	0	0	0	0	0	0	0	0	0	0	0	0	0	0	0	0	0	0	0	0	0	0	0	0	0	0	0	0	0	0	0	0	0	0	0	0	0
ENSMUSG00000002028	Kmt2a	0.0414910310608785	2.09598134752409	1.98297841671275	0	0.201727002051705	0.0261591941354707	0	3.6452148793334	2.57232746387343	0.347076868598883	0	0.5335271877532	2.15600300605204	4.8754132999482	3.81125813314074	0.688246442810673	2.24661409148583	0	1.70821267986582	5.42597286451168	2.12679704411076	3.90134201786548	0.225679510752563	3.59288299306229	2.12640679232931	0.784590498591714	0.390284483440774	2.23857317805006	1.65429650077434	0.436648765182664	0	2.64563894459395	11.3985352514745	2.34628961557321	1.35159457871053	5.67862625014763	0.374193833564183	5.37690715805175	3.30803485943856	0.504347484199926	0.945848183972372	1.75489168396127	0	2.49976954977749	0	1.77714005715004	0.381879852641415	2.86525139244032
ENSMUSG00000002031	Ift46	8.19292660094268	8.41617765352035	0.958541153123052	21.6360577393278	0.0524125486939203	0	14.3708630298754	11.9747873925704	0.0689010380343762	10.5807955768873	18.1111727714672	7.37209597966705	14.0602916113353	3.13546037868419	0.0362724559248948	0	0	1.33692466950888	0	1.26517994588822	0.439554429050394	0.64873188466651	1.12385418248182	7.26712019181166	0	16.0250068494617	3.22647191486511	1.95354725618701	6.76331259504312	4.12001664568886	14.6290032098443	0	0	16.3591838304168	9.65718118368729	5.36514960269559	15.4861940999046	4.57207765202054	0	0.0623996004157223	0	25.2528677675724	10.539026743223	20.2612057819191	0.364557300175009	34.8148274057499	17.4874753981855	0
ENSMUSG00000002032	Tmem25	0	0	0	0	0	18.1923675827932	0	0	33.9947253508885	0	0	0	0	0	0	0	0	0	0	0	0	0	0	0	0	0	0	0	0	0	0	0	0	0	0	0	0	15.6018116805458	0	0	0	0	0	0	0	0	0	0
ENSMUSG00000002033	Cd3g	0	0	0	0	0	0	0	0	0	0	0	0	0	0	0	0	0	0	0	0	0	0	0	0	0	0	0	0	0	0	0	0	0	0.151452067529673	0	0	0	0	0	0	0	0	0	0	0	0	0	0
ENSMUSG00000002043	Trappc6a	22.4167763504843	23.9876485358842	6.5312303743633	10.9825508298898	6.34887814512636	7.68411922886867	14.7320125173533	14.9449512041014	10.5718214481342	18.4484424738954	24.7935876912153	11.7031671752649	30.7609662371346	24.3076516526775	0	3.78206569625081	13.1149786153279	5.17325623112246	43.1609907803217	24.0828930668903	24.3403215689637	0	8.28651419437275	31.7284846482078	67.549056291878	0	18.9832461403309	8.60504092615997	18.8863424779292	9.40275120758521	41.0910595537192	0	0	13.0862592622335	0	0	19.347701752249	33.0758695002266	4.46687457949723	13.3535930284239	28.7760470470588	0	71.8099701377441	40.4773612886166	63.0013747659523	19.3895039287595	0	16.0692732683358
ENSMUSG00000002052	Supt6	0	5.62100358645597	2.76294927731072	5.47832910606733	3.41255555944382	11.431954971152	9.35949241840427	13.5852041202908	14.0814105097187	5.05592426739521	16.6022667962742	16.467016372192	9.57402079063809	16.3696692899472	0.0328011384375088	7.70030417239097	9.10969353438897	0	4.86144351231127	14.6009042907174	12.8332015502655	8.61638465842826	17.3654737560298	5.34280331971601	0	5.73511018906379	18.4231578821149	7.30726047029484	2.000578894368	14.4169401911195	10.8760076520107	0	31.6900451059355	3.97752193079725	4.3400251196208	9.44804417108499	0	2.06726217162535	12.3896141030867	6.54563453234726	5.49228035083009	21.7789094543166	0	24.8977414804798	9.95599563992534	13.9460533719504	31.067029400255	4.91141686508764
ENSMUSG00000002055	Spag5	0.0614914196110282	12.6763399118708	18.179898762273	20.7336833255055	4.72369027048279	0	38.3957379681598	18.6288235267842	4.79484577911487	17.9690861389328	0.495314230299775	12.5075834916363	0.0639057078785339	1.71696561504732	5.91741519232218	19.0887514531684	9.39799327534507	0	0.356569247657965	14.3647586648982	35.531647112541	0	16.8348060123586	3.43752963588663	43.2363397546016	23.126710195025	0	3.34298342701703	7.78786620401557	23.5010906816676	9.49895323092168	0.258523915595532	0.0910679215769919	23.6808395367995	0	22.5499362652789	9.58615062826798	2.46308308470239	7.28115463961569	0.355935131816567	20.6262801051921	0.26675096082389	9.26787220182549	0.0805382954936738	20.1293709949264	4.42477538980451	38.4853952489511	11.4306168893911
ENSMUSG00000002057	Foxn1	0	0	0	0	0	0	0	0	0	0	0	0	0	0	0	0	0	0	0	0	0	0	0	0	0	0	0	0	0	0	0	0	0	0	0	0	0	0	0	0	0	0	0	0	0	0	0	0
ENSMUSG00000002058	Unc119	0	0	40.9811583443675	10.6931821499356	0	6.05658008664301	18.5396737824885	33.3821212178981	0.180583766351535	0	2.92610003277934	6.60568792323666	0	19.1748088953519	4.37308315026543	0	0	0	5.40656861203734	0	0	18.5967156889184	0	7.12308300431256	24.900300172469	0	0	0.232730971399581	0	7.98128828464364	26.2176196666545	0	0	2.831435997779	22.7028872604267	14.6166644533706	0	0.166430931232774	17.8427946375593	0.654176203051102	0	0	16.6882273960975	0.185027522000172	0	0	0	22.3337259258755
ENSMUSG00000002059	Rab34	23.4901863775985	6.95500254524977	76.0691828653695	13.3038103820811	11.8437855946735	0	0.400618968725869	25.4782943557601	47.4505993154343	0	20.0226216079492	21.6965689373026	31.1937023603929	0	8.19657127295032	0	13.2966828127146	20.380300147124	30.2693652653343	31.2799669528608	31.9265798126868	2.83592395368261	16.2997066067927	0	9.58426648147864	0	33.7267679854488	20.1852401760301	92.3318387512279	4.49763163713252	39.0430653262479	31.4969207131988	0	49.8210625161761	25.6643347674217	3.98807677848832	0	0	0	0	49.8660000704442	1.88705333795416	0	67.0400096315793	0.196142527289128	68.3174365366043	32.1966946724777	8.94275171222285
ENSMUSG00000002064	Sdf2	0.228269137882787	0	11.4170792792775	19.3728506133126	9.3225837106588	7.771611675534	31.8492080137066	35.4991189026483	31.5138339822338	1.52759640912037	20.4884944869461	0	54.8004732383828	35.5867095420655	0	0.540927307951623	0	0	35.4740977086475	53.5801619327975	106.371757351714	27.3019777125096	17.3825360460176	29.2748592590499	0	0	25.7665043127038	0	0	34.3906600146229	0	31.6699475532713	0	23.8561498607779	1.98293347653286	0	25.8805934033623	22.3208596248184	0	27.4831729186776	0.148677880498062	119.323427156874	18.5969184775904	0	0.308778830088826	222.920225861834	0	0
ENSMUSG00000002068	Ccne1	54.5633555352432	55.1535026079816	6.64209245323359	203.822671193691	68.5948345019401	143.337545251131	152.187049562114	67.694149528614	66.4266055640207	135.914189150305	280.298838602078	216.257616710957	50.2249890355001	11.3860949573206	89.435285871544	91.6375970812936	110.961724307328	130.368067991821	203.849165459416	54.5980527412235	35.5663081434487	6.74296112578424	28.5005866988275	114.917738428181	225.749815779812	174.148110529932	0.222185722934148	99.9480729524957	170.475539540092	21.011595904877	113.860365788737	230.48912379884	82.9239451912172	122.565288117662	120.752603761592	71.4617814928223	32.4711649101078	79.1275918343719	333.705838611742	41.0582807291382	124.469692243487	164.560691913103	188.39335108384	158.412473726645	52.8954839229737	250.398499975789	260.962768891049	43.4464089848564
ENSMUSG00000002076	Hsf2bp	0.697936920065434	0	15.7732089785018	14.9416154947086	0	0	0	11.2767982255913	0	0	0	0	0	0	0	0	0	0	0	0	0	0	0	0	0	0	0	0	0	0	0	0	0	12.9894218240333	0	0	0	0	0	0	0	0	0	0	0	0	3.61335988217656	0
ENSMUSG00000002083	Bbc3	0	0	0	0	0	0	0	0	17.6910876188453	0	12.7403828169225	0	0	0	0	0	0	8.41347759687791	0	0	1.13808765810627	6.36881226886349	28.3395664349923	16.2408392154333	0	0	0	0	17.5660192024451	0	0	0.228176161536295	0	0	0	0	0	9.39911631978986	0	4.5237947600822	0	0	0	0	0	34.5903076208446	0	3.96008699598315
ENSMUSG00000002100	Mybpc3	0	0	0	0	0	0	0	0	0	0	0	0	0	0	0	0	0	0	0	0	0	0	0	0	0	0	0	0	0	0	0	0	0	0	0	0	0	0	0	0	0	0	0	0	0	0	0	0
ENSMUSG00000002102	Psmc3	205.215005677629	134.023816890014	198.306244047239	153.962134706552	111.448017004621	53.5265075551419	122.962132204817	187.005281813616	60.0277895090561	172.663220132135	184.09176178609	177.400348075176	184.321220706776	191.576861661197	64.1843542450925	80.368269591654	120.601328427734	137.916745487252	60.3065144565195	145.009075439692	244.48061181202	163.948009623835	181.104993959638	197.460542437656	257.706333740744	162.492628085036	96.4211038134054	104.242050011279	185.583538340297	85.6725628528837	316.057497197536	224.755357126059	187.028010503817	176.236992145829	102.558049600425	159.142817230027	125.275785348305	184.72339510378	107.438673441304	278.882316325804	301.97093455934	171.197430990749	156.704183604322	234.205239723228	249.959838559765	312.499206252016	132.318457600752	170.423056726854
ENSMUSG00000002103	Acp2	0.866903330235537	0	0	0	0	0	5.52724396689857	18.7206864488162	10.3996192293644	0	0	0	0	0	18.3989339872332	0	0	11.0267498130466	0	0	64.1691831046867	0	0	0	0	0	0	5.93235105500452	0.0782001391413199	3.17650964510306	0.143072462641684	0	0	0	0	37.8170792199584	0.945070839907778	1.09986904651169	3.36900588297302	4.55476173154053	19.6754504428109	0	7.33423592678207	16.3326569439165	0.180408764976695	0	7.13498064920594	12.8594285510574
ENSMUSG00000002104	Rapsn	0	0	0	0	0	0	0	0	0	0	0	3.81385000851022	0	0	0	0	0	9.32187171521785	0	4.93367354407359	0	0	0	0	0	0	0	0	0	0	0	0	0	0	0	0	6.67595142496049	0	0	0	0	0	0	0	0	0	0	0
ENSMUSG00000002105	Slc39a13	0	0	0.947319784109289	0	0	0	12.755382137344	0	0	0	0	0	15.5749851990085	0	0	0	0	0	0	0	0	0	0	0	0	0	0	0	0	0	0	1.39351947821796	0	0	19.8209350933316	0	0	0	0	10.6070862350541	0	0	0.289323593074035	0	0	0	0	0
ENSMUSG00000002107	Celf2	0	0	0	2.45167576582162	0	2.96511292141633	0	0	0	0	7.99466057480123	0	0.0138852457544767	0	0	0	0	0	0.0309897303172369	0	0	0	4.49354405493413	0	0.0639936359273104	3.67744379434234	0	0.693337608814885	0	0	0	0	0.771691919603272	2.29530277586694	3.97511742506739	0	0	3.54157614445263	0	0	0.513428077125608	0	0	0	2.69286776425982	0	0	1.45070741085713
ENSMUSG00000002108	Nr1h3	0	0	0	0	0	0	0	0	0	0	0	0	0	0	0	0	0	0	0	0	0	0	0	0	0	0	0	0	0	0	0	0	0	0	0	0	0	0	0	0	0	0	0	0	0	0	0	0
ENSMUSG00000002109	Ddb2	8.59513398563039	0	0	17.9754609027625	0	0	0	0	0	0	0	0	0	0	0	0	0	0	0	0	0	0	0	0	23.4900428972548	8.23287914143194	0	0	0	0	0	0	22.089030311397	0	0	0	10.7481082801792	9.53036069375041	0	0	0	0	0	0	0	0	0	0
ENSMUSG00000002111	Spi1	0	0	0	0	0	0	0	0	0	0	0	0	0	0	0	0	0	0	0	0	0	0	0	0	0	0	0	0	0	0	0	0	0	0	0	0	0	1.36059602112077	0	0	0	0	0	0	0	0	0	0
ENSMUSG00000002129	Sf3a1	13.2210053383308	38.5253972643715	46.8978773062889	9.54933095141326	31.1278186378867	15.7488817479912	2.95331845905528	4.99952730832807	26.824753439182	59.235054510807	20.0042992968146	24.1363906020928	37.3613539952124	15.621553574514	20.8985994179595	41.4618537580977	18.4742588783223	6.57014994300264	43.1278132967487	62.9460125911334	7.79942747444031	14.8543454528544	43.1983026310356	47.6075326748223	26.7849813682845	38.0626303970382	0	42.9587979887086	54.2971032155533	27.9831991395217	40.6172410539959	57.7128671416077	27.9120883305541	61.6958118604111	44.7176176753987	41.3363615892049	46.9695049986484	22.9991464326122	56.0467519991505	60.5711611726965	21.1065992578215	3.90488343236976	41.0216799849143	31.7586331758773	60.501210741782	48.2905069175151	2.52431621723771	12.3639863185611
ENSMUSG00000002147	Stat6	40.5377364489982	0	0	0	0	0	17.5814573996609	0	0	0	0	0	0	24.7389011012962	34.311205386635	0	0	0	0	0	0	0	0	0	0	0	0	0	0	26.8919736115026	0	41.9468854307763	0	0	18.6820645022562	13.8904504527572	0	0	0	0	0.255846193723948	0	0	24.3863079518337	0	0	0	0.341209546775337
ENSMUSG00000002190	Clgn	0	0	0	0	0	0	0	0	0	0	0	0	0	0	0	0	0	0	0	0	0	0	0	0	0	0	0	0	0	0	0	0	0	0	0	0	0	0	0	0	0	0	0	0	0	0	0	0
ENSMUSG00000002204	Napsa	0	0	0	0.596420822580139	0	0	0	0	0	0.870040811961411	0	0	0	0	0	0	0	0	0	0	0	0	0	0	0	0	0	0	0	0	0	0	0	0	0	0	0	0	0	0	0	0	0	0	0	0	0	0
ENSMUSG00000002205	Vrk3	9.84562971935723	16.6940204104648	0	5.41059103283703	9.07514265428159	0	3.61278827557615	21.127693472702	7.34159767544461	0	11.860597641764	9.29145249700816	0	10.1023070434322	0	2.18729058242004	0	7.52542156298681	0	0	2.32983959190616	0	0	2.41697679536708	0	14.0604457567539	0	1.73181658788799	0	8.52094834659464	9.95679538982938	6.39583464889903	0	0	0	12.8948491668458	30.0606263610966	0	4.93851727023551	19.8871893756727	0	21.8001668979847	13.3686033184102	0	8.87876493636197	19.0646757750118	0	0
ENSMUSG00000002210	Smg9	0	0	8.51397898352031	0	2.45260146821858	0	6.96862736118378	12.4522262416097	0.119413576452879	0	6.55724631872972	0	0	0	0	0	0	9.17164510803904	0.541692449710534	0	11.3181618640844	0	0	0	0	11.0896585036782	0	0	0	0	0	0	0	0	0.912928753124173	12.1124327718964	19.3773173591091	10.3451524710524	1.62233513641342	0	2.73801040058221	9.52319664676624	4.1858137010946	0	24.5146369398722	24.3273288082607	2.14949255251634	8.92601224957071
ENSMUSG00000002221	Paxip1	0	11.5799048358253	0.486503264651005	1.00400311775003	1.34236543756478	13.119150400899	10.6515460546278	7.82032123076813	0	5.37023535608155	13.3282702690633	13.9334931086883	0.034992279340753	5.58863122835489	13.6176779676457	1.88832135396801	1.88195674787799	0	18.5481275083923	11.9300947508406	0	15.0193653052773	3.57124477474355	15.0211529045154	0	2.79441243768968	11.8625673504863	2.91213946492787	10.0290783840978	1.79036979922295	23.3695376762278	11.560540447888	0.0498652507982672	8.48379304262408	8.11654191610233	18.1684168745019	1.51830669007763	5.11708272182456	4.41214388282282	30.4427911717205	3.70623514101073	9.56709034569351	3.0174047943632	6.04165029873719	5.60212161356268	37.7846864239367	8.71589826510799	17.7532214179215
ENSMUSG00000002222	Rmnd5a	17.7935843459318	30.2823089732618	0	0	0	0	0	39.335169632503	5.53971253168619	0.0568654125464975	14.0804813607427	11.1452358644685	13.1935750517632	1.38404635635623	38.1183030790053	10.5916645150516	2.44896887591225	23.6583566583522	23.9470708174997	40.3467725984129	6.05839144315216	1.95595102068624	0	0.0558855809426287	0	0	8.71971685759547	0.125989698802781	1.85344590434814	0	18.2129789539661	0	1.05710214850155	12.6274138160885	4.20748489768526	3.40550057883804	16.0277367172726	18.9205690243574	18.272094959666	0	0	0	7.89196960603627	0	0.137933046611992	25.7683998291136	11.6727617901642	8.37030329668441
ENSMUSG00000002227	Mov10	0	9.3787191523236	0	0.848838623896827	0	0	0.0852038737659353	0	0	0	0	0	0	0	0	3.36162155262606	0	0	0	0	0	0	0	13.9946285670603	0.236334763309078	0	0	0.0508048348480626	0	7.17419171653361	0	0	1.55284855468754	0	0	0	0.0794645877030617	1.81658159290989	0.389505629327138	0	0	0	0	10.4209401154768	0	0	0	0.214304180475125
ENSMUSG00000002228	Ppm1j	0	0	0	0	0	0	0	0	0	48.0552861557077	0	0	0	0	0	0	0	0	0	0	0	0	0	0	0	0	0	0	0	0	0	0	0	0	0	0	0	0	0	0	0	0	0	0	0	0.653250821448536	0	0
ENSMUSG00000002233	Rhoc	0	0	37.0596417643792	0.490259390625207	7.48210188326757	0	20.3732572893612	24.605705398987	2.45897499397838	0	52.3876796968801	9.99426701859293	50.8676795759779	12.1017660209605	6.04104526761017	9.45452674219524	0	0	0	0	0	25.8855248491684	0	2.10855813337741	17.6083274933814	1.1227101026236	0	16.725560787604	0	3.0780740974151	63.2833023447765	16.7739093682157	28.1722949285916	0	41.3116247386137	26.5936340010004	13.21803539929	17.3746486133438	42.1808958520794	30.6824003072571	7.65672706582261	37.5515450239673	33.0848144856267	0	6.07156889942892	26.3658168379946	13.5246655938767	7.61213614599585
ENSMUSG00000002240	Prr27	0	0	0	0	0	0	0	0	0	0	0	0	0	0	0	0	0	0	0	0	0	0	0	0	0	0	0	0	0	0	0	0	0	0	0	0	0	0	0	0	0	0	0	0	0	0	0	0
ENSMUSG00000002249	Tead3	0	0	0	0	0	0	0	0	0	0	0	0	0	0	0	0	0	0	2.46222497127634	0	0	0	10.1223093277782	0	0	0	0	0	0	0	0	0	0	0	0	0	0	0	0	0	0	0	0	0	0	0	0	4.64467034531798
ENSMUSG00000002250	Ppard	0	1.75283434311635	0	0	0	1.22413279229062	0	0	0	0.666323633431902	0	0	0	0	0	0	0	0	0	0	0	0	5.68657786864966	0	0	0	0	0	0	0	0	1.77909411374488	0	0	4.29765826760435	0	0.769696295834277	0	0	0	0	0	0	0	0	0	3.7802477099361	0
ENSMUSG00000002257	Def6	0	0	0	0	0	0	0	0	0	0	0	0	0	0	0	0	0	0	0	0	0	0	0	0	23.2317587325375	0	0	0	0	0	0	0	0	0	0	0	0	0	0	15.2274803017664	0	0	0	0	0	0	0	0
ENSMUSG00000002265	Peg3	57.231325073761	49.2946250759355	51.0038279981495	2.14324744709825	41.5931888073009	84.4066528916667	29.9393072929808	140.750241137192	201.293379405078	301.244557108218	64.1844566181493	27.6713080173147	110.270977644332	120.726840184587	214.296885570407	92.955946352266	102.526080987514	42.8649381753203	228.016988515087	235.192196957735	126.422542215849	10.660256020729	143.27084933209	140.345366306551	67.4051479934033	82.4289308299907	237.710875283961	27.4942542603655	85.2547377938205	164.667083780802	89.2384419463962	46.3767534566527	39.0928259377916	52.4303210111527	41.5144141358014	153.005480937523	71.8965459313865	73.4180749098206	186.162591622337	137.798849078484	176.999097444782	55.3401335113745	133.322695937278	19.7850023704921	109.471643215903	71.9945259300615	140.676269716213	237.813609635219
ENSMUSG00000002266	Zim1	0	0	0	0	0	0	0	0	0	0	0	0	0	0	0	0	0	0	0.0496004315812119	0	0	0	0	0	0	0	0	0	0	0	0	0	0	0	0	0	0.330614353142023	0	0	0	0	0	0	0	1.33062062013915	0	0	0
ENSMUSG00000002274	Metrn	0	0.246115330876594	0.268043934729668	3.87216029164651	1.64152886118644	0.304096071295883	0	0	0	7.80043563862195	0	0	4.26073704243436	0.374097885441892	0.486870454422856	1.14296355864255	0.421233824909669	5.233957527631	0.839056673149957	0	0	1.0884580993777	0	0	3.46529554883369	0.253353548960249	0.412453552615551	0.79459611992493	5.65614953398724	0.267156093209829	0	0	0	0	3.40427779117108	0	0	1.42058200717514	0	0	2.51321605528104	6.80010329419674	5.89421160952918	12.9503781925476	0	0.41317886684367	0	0.837938312359853
ENSMUSG00000002279	Lmf1	0	0	3.22428737818015	1.58989471745622	0.624079341585986	0	0	0	3.51134952290518	0	0	0	0	6.63053858109952	2.07311181543278	0	0	0	0	0.143472124118809	0.149537165381048	4.84711698638326	0.302545015064385	0	7.52522974295607	0	0	2.4318321976249	3.10082621360323	0	0	5.97218200127036	0.0380198939164875	2.24192007527463	0	5.88397490701918	0	4.92984454786031	3.03980503995239	0	0	0	0	0	18.5439211142574	0	0	1.00349193260673
ENSMUSG00000002280	Narfl	0	12.0840954956852	0.904175384636982	0	11.68977923468	0	0	0	0	0	0	16.5891510302214	0	0	16.1799802767792	5.85462619505403	11.1305478298204	21.6722034942934	0	0	25.9041363352133	0	0	0	0	52.6066858394626	0	6.47753677009895	19.8215074063637	0	17.550608496866	0	0	35.5858918995001	35.9225295152478	29.122103486258	18.0505701003438	0.106487956000478	0	0	42.9770783943626	0.196054286941134	0	0	0	0	0	0.157031304224259
ENSMUSG00000002289	Angptl4	0	0	18.4818169140506	0	0	0	9.8862422927513	0	0	0	0.121104566177112	0	36.7499438747967	11.5094868912109	0	0	0	0	0	8.46958824396364	0	0	0	0	29.337533794989	0	0	8.14884194928491	0	0	0	0	0	47.4605887880911	0	0	0	0	8.14165741921986	29.3626769751714	0	30.1319807189455	0.857405097186533	29.773777465912	0	0	0	0
ENSMUSG00000002297	Dbf4	0	1.90051341320127	17.3074445398856	0.0908844745682385	27.3554110699286	10.3422627877323	0.273681324590742	0.720223443042856	11.142895646916	0	7.88786452465999	46.0406155243666	41.6726133733021	2.1205023701268	47.7287005285614	7.88707713220939	0.415249293025067	36.7314232239792	0	9.34469385025081	7.24709393471931	38.4787646774622	15.3735978664161	7.6005478595811	10.0963656838475	49.6178179579656	0	6.52755978444288	36.8466906299725	25.8532289623562	1.36017193631489	20.3231550366328	0	10.3806961505584	13.208528222428	0	19.1434725846872	14.8442356153976	5.94282814062614	0	0.154844401206162	20.4542485147976	7.42449157139824	40.9977572578566	26.530816241334	19.4829363061924	0.364684758451672	17.6908862145094
ENSMUSG00000002307	Daxx	19.564486492279	47.4342632505108	0	6.74435318666488	8.13755379957301	13.9748950593045	29.6828786262472	0	0	11.9827399816137	0	0.264400327601101	65.3464911107044	27.9806378848679	0	4.91309875028003	4.64197471080148	15.5444088508648	0	31.0953168126293	0	11.4843363559259	23.6821421849969	0	0	11.9994139666804	0	0	23.3407724654322	14.0311987633238	0.242633679287041	4.43757118341613	0	1.9428259336344	0	0	22.5838722053353	12.3905596887437	0.714178568880727	0	24.601862102951	35.0767918125113	31.7859527968429	48.2867376969239	38.0909685966508	91.4516970782879	1.17097437646729	21.1204023122683
ENSMUSG00000002308	Cd320	10.8071169966382	17.1562895231893	27.2858798001664	64.267104840522	53.5814779434952	72.5107227039761	17.8783169984349	0.269466315624059	39.9090123636892	15.4763432498074	84.7485268753128	24.7988534118176	48.1148835975229	15.0050488657277	0.987640759782167	22.6586352086603	30.6452483013276	0.137887549504388	31.4108893605065	0	20.8280579282133	0.100363227527496	35.9226144849805	28.8106340355589	106.848751827032	7.70910278028349	81.0060686844131	30.1128017994236	21.4351046517759	18.7708076324026	98.7580856422149	20.1935902959621	32.4055642421437	45.2692683930619	15.6465844632671	0	40.5677756972422	43.6973656114494	0	16.8359514479679	37.8018673592728	12.1544581316145	175.546085501861	78.4619486348507	28.1546252712936	52.3465105583817	25.4809405340079	102.567431793284
ENSMUSG00000002319	Ipo4	20.8133638967168	13.3794176595492	11.4431624189175	3.39789973883738	11.3797533010046	15.1304241016501	9.72052289987833	8.82607511581839	35.6003355259665	28.8317872269671	22.6717915583263	31.6037388796874	20.8607721140512	5.45763064186646	8.97201411405923	3.56891533978363	13.7783788764253	20.9742644588589	42.5207109518122	51.7432261727479	45.3879790726107	4.51305640305267	0	1.46140375232583	10.0044544613533	28.4017522084566	0	22.3302102144935	25.5366247476	21.4976829016231	25.6647606100778	26.2616149661773	84.6845459440201	42.4156614910687	29.1953402964195	19.0136194236775	12.9783423178722	29.3197903202037	6.66553917473356	0.428738312558658	15.1965734676992	8.99674604901684	7.241207494594	35.9913205613048	16.3314174761801	31.852028755303	14.6570623887285	15.1197703942036
ENSMUSG00000002320	Tm9sf1	0	0	0	11.2443771061178	0	4.2708255456328	0	14.0411396462912	18.7993285836887	9.54354045285507	0	0	0	6.15265679476894	0	4.29465611377571	3.58070464256977	0	0.206736644209113	0	2.49205998537908	0	13.9785094040899	0	1.28073036521328	0	15.5486485139102	5.87345791738324	14.4240559739665	2.76465243674254	0	0	0	12.2498179485649	2.03244293028005	3.6187832181828	31.0053207932444	17.7459983046838	0	0	12.1912030104274	0	0	0	11.3332972146778	0	0	0
ENSMUSG00000002324	Rec8	0	0	0	0	0	0	0	0	0	0	0	0	0	0	0	0	0	0	0	0	0	0	0	0	0	0	0	0	0	0	0	0	0	0	0	0	0	0	0	0	0	0	0	0	0	0	0	0
ENSMUSG00000002325	Irf9	0	0	0	0	0	0	0	0	0	0	0	0	0	0	0	0	0	0	0	0	0	0	0	0	0	0	0	0	15.4357433949706	0	0	0	0	0	0	0	0	1.13467207479901	0	0	0	0	0	0	0	0	0	0
ENSMUSG00000002326	Gmpr2	16.6525970944377	1.25885640323019	8.32404463801254	0	3.59839855328614	0	0	1.95745823976386	6.75774359279324	28.2041000708102	7.19857883223372	3.91393320618578	4.57841657463534	0	8.95320653740966	26.6556573929842	0	15.2067659181318	0	0	26.0719209850403	0	0.239622767149378	5.79472961325632	0.253209366472739	13.1439175713828	2.10966051523817	2.61275350923596	0	7.51562840765424	33.9323045939182	13.4589636214616	9.13417053921788	7.18994091694433	5.45338281420366	0	21.6819279390965	9.23837957950239	3.06032340127514	2.04002973894153	9.58375723704767	18.5375946695968	0	3.80821995853806	0	13.8878628140004	14.3943164710446	12.8579232297603
ENSMUSG00000002329	Mdp1	36.5910260516097	20.8422864848643	0	13.2727114158828	25.6511965674852	0	37.1469601340968	15.1240621871519	0	25.8157778982251	0	13.1307552458354	8.84364422019868	29.8324653310901	20.0426739726732	0	30.6186409482322	0.175888055273314	14.2111094798863	0.190227655905953	0	36.9984691841128	4.16568614643295	9.88720987366835	45.1600317361096	8.93968969510326	14.2625301811439	65.8885202887554	12.3739405208597	0	67.3691754367263	0.715520915998657	33.2706253962935	43.3697007668804	56.5494666822015	30.3143181446961	17.9801925918246	9.22315664579733	11.2852163721414	52.4087856530979	10.1981904447932	0	7.62592633929735	44.3585272625137	73.208846934987	0	18.4054531093764	78.204757950272
ENSMUSG00000002332	Dhrs1	0.1252999072074	0	0	8.33476490105651	0	2.527963862251	18.0017262686168	0	0	21.6617045151987	0	0	43.2328596986037	0	0	5.74049306155907	0	8.80561881356718	0	0	16.348876619057	0	9.88226864883258	0	30.7276293999769	0.26326738348478	6.64319211158396	5.47018970167885	0	9.85515596886433	0	27.9198335396346	0	0	20.0004166617414	18.8721490410608	1.93720844891768	22.8806349807839	38.5753462327234	0	41.1320588525725	21.1985828779959	31.1346779185964	0	0	13.3097488019337	6.48702833919741	21.1151346689549
ENSMUSG00000002341	Ncan	3.94133078515339	7.99548153853466	4.48749134145891	20.506265891574	0	0	8.10063247603657	0	0	16.7796752194309	0	0	0	0	0	0	6.9681851714244	8.04719021363315	0	0	7.27933203975683	0	0.043572821916206	4.47826422798851	1.33525856561314	0	0	0	0.11272992955855	0	0	0.202076233677453	0	0	7.98530342586751	0	0	9.8528961807453	0	0.0556436186611917	0	0.104253467941178	0	8.37275896079277	0.130034726222257	0	10.0089873434621	0
ENSMUSG00000002342	Tmem161a	0	33.246274715234	0	0	9.52164630865778	0.474896560019926	0	0	10.5913632677683	0	0	0	0	13.5830226513209	6.71624072548251	0	26.148608625743	24.8130015574245	0	5.36718552595854	0	0	38.5801571104194	0.516024905436769	39.2343535784911	4.35219045063867	0.161028694378084	7.29025174117893	11.7037483496351	5.42371237638729	0	0	33.8841099375463	0	0	0	11.7667085476051	26.9544703176838	8.77031893238487	0	25.3885797514809	0	19.1766481714875	40.0783818413659	0	0	0	13.7400894845655
ENSMUSG00000002343	Armc6	0	0	0	2.91811046240927	2.06179590692945	0	0	3.21178735483244	0	0	0	15.3676408681356	0	0	0	0	0	0	0	13.034851516891	0	0	0	0.697250574249879	34.3266100583548	4.23229355914833	1.08790630493691	0	0	7.9861817783804	0	0	0	13.5081594050124	22.2179580729163	15.6901496625864	0	12.6148727423178	16.7378760241973	0	4.41931554049419	0	5.61413717682623	0	8.17430897373408	0	0	2.21018431623059
ENSMUSG00000002345	Borcs8	6.59616950203531	0	15.1864782965504	11.3474343151657	7.10125768734739	12.7732778939011	3.90521624146267	0	32.52279188221	21.8083118148093	13.5541418412122	17.9001543314955	0.24482677187253	68.1533464444585	21.4017373459856	0	0	12.1731787573356	28.6868218156651	0	31.2865569009104	16.6575610767162	24.1323087647429	30.2121333633927	42.2001236959194	33.1630821212572	0	15.9119496849	22.9293675011658	11.4826163877162	53.5757642190298	30.3729205541446	0	58.0086179194646	19.9525927215504	43.8121825149423	2.42810868256712	18.0398431728603	15.9928809155998	73.0894850951155	13.6559823003788	21.4607326138588	0	0	18.8012232476088	0	47.7011638820547	9.82237226095936
ENSMUSG00000002346	Slc25a42	0	0	0	0	0	0	0	0	0	0	0	0	0	0	0	0	0	0	0	0	0	0	11.868906769008	0	0	0	0	0	0	0	0	0.161656493363272	0	0	0	0	0	0	0	0	0.0375662089650706	0	0	0	0	13.2412939188146	0	0
ENSMUSG00000002365	Snx9	0	5.26978757410755	0	1.97405149904169	0	0	0	0	0	24.6373232553486	0	0	0	0	0	0	0	0	0.332699369361824	0	0	1.07897754355566	0	6.44626616212687	1.37404502060763	0	26.0035627589275	0	0	0	37.8526654188934	30.3532025021015	0	0	0	0.563581389861625	0	1.35188028090528	0	0	0	0	0	0	0	24.8205508089739	0	7.22656629153812
ENSMUSG00000002372	Ranbp3	19.4192400990966	15.1797584721306	48.2190863228747	72.3424491968272	53.4350004204129	11.2882496238508	216.323473784853	108.760081970588	53.5201092189094	61.2909276096591	99.5270217441729	43.7916859599231	69.9917912553722	96.9937040806642	11.6779106845798	26.2180637253095	4.20982191800404	5.55108586391859	32.7435935491694	96.3662547181844	37.7051024603187	32.7378373147756	138.587082275063	1.05675160045279	10.422659539232	22.5711677883725	22.8480542659172	45.3783686169792	38.9233640392032	62.8586049849115	68.9967663318027	93.2234562766996	52.2160468669632	57.1796394021525	25.1242646578625	61.3288475408428	122.25783468737	129.804195828859	93.9336801564414	0	91.8569958938562	43.9128809916394	46.5645064509082	59.3467487052021	164.689420941761	0.707883506635391	98.8735757059988	105.876058625325
ENSMUSG00000002379	Ndufa11	23.9129293033468	45.3595826723587	60.0901920328354	18.7801956873318	28.8130747958677	21.3038668211118	50.6283915437727	45.9338296757133	30.2354637073271	44.355406445203	60.1186550139467	47.2481696281654	28.0933430404532	41.9327036777618	30.8724536853011	18.5807818802398	3.63201385897311	37.0701427339508	47.477175225926	82.2183802289768	68.1312904683684	37.3446251623395	52.3099832533158	66.6687888424811	29.8788955552199	32.2213158411586	6.44580738033458	23.9794238310603	32.4619621563346	51.1090388464215	74.0300795112624	17.1201577255507	97.0055089959779	87.0745232984239	44.311409438249	62.1270295376523	62.9574545894029	71.8080982035033	85.1505633605284	88.7673594128868	110.126393322017	38.6186422967451	52.4099740297144	76.4274223455592	56.7829299548352	44.0866974899124	69.2274731645879	41.2049316114497
ENSMUSG00000002384	Bmp8b	0	0	0	0	0	0	0	0	0	0	0	0	0	0	0	0	0	0	0	0	0	0	0	0	0	0	0	0	0	0	0	0	0	0	0	0	0	0	0	0	0	0	0	0	0	0	0	0
ENSMUSG00000002393	Nr2f6	0	0	0.128855180154993	1.06368044791362	0.789122489755732	0	3.36322511710278	0	0	11.3788777105781	0	2.71048005968544	0	0	1.79438611328357	0	0	1.79720681352015	19.0921256274645	0	0	0	8.72310950587647	0	3.44275893011181	0	9.12071275384922	4.10630120238108	7.88523749649324	1.54114048003846	1.36803749645617	5.0365508482051	22.8354263480447	5.97502015258531	0	1.3665384488331	0.298731440329244	0.819489613793825	0	0	7.24898120671743	0	0	0	0.940931802047411	0	0	0
ENSMUSG00000002395	Use1	36.4194446586664	5.12652760021115	53.3902636110382	20.5241318927827	8.09023257297785	0.395890845427414	13.8789104372031	15.5353508010806	12.6420112491144	18.2091156166595	83.6362536831819	31.1963582175916	48.4536964272972	29.0996531742982	21.0222838700004	11.4078450873502	29.7500452037542	24.984247553594	7.46429082178523	24.3892060623353	17.5564098833788	60.9319140479598	37.7118521230514	26.4988978266968	44.3614457867488	31.6637884376429	0.268478617544576	27.025104938518	28.3495560255925	11.1296039992852	93.6308279483506	52.7984930116849	31.3855691230664	31.4632561169451	32.5573959054091	6.37352650319984	29.7308296222909	30.8849875546335	40.1499326270128	34.5291007220981	14.7233619652552	5.10737881414057	19.1836120019629	56.5413199321452	44.1681275250072	30.122483634148	71.1580581749818	34.362697691881
ENSMUSG00000002396	Ocel1	4.21800276442461	0	3.77208049462555	0	0.0471441066059432	0	0	0	0	0	0	0	0	0	1.85970452841794	0	0	0	0	0	0	0	0	0	0	0	0	0.479230689459841	0	0	2.91255658983227	0.883274943549723	0	2.84578286260122	0	0.761976577011848	0	0	0	0	0	0	0	0	0.459077455922052	0	0	0
ENSMUSG00000002409	Dyrk1b	0	0	0	0	0	0	0	0	0	0	0	0	0	0	0	0	0	0	0	0.573718139964224	0	0	0.581644626506683	0	0	0	0	0	0	0	0	0	0	0	0	0	0	0	0	0	4.17897938691212	0	0	0	0	0	0	0
ENSMUSG00000002413	Braf	0	14.7159994393108	0.776403121285935	10.5292240442802	11.9354512271487	8.83975821042861	8.51257507508174	0	1.46697278612853	0	0	1.0790592795684	0.0777822178132032	21.6138278295824	0.0167886363594088	3.86242857748172	0	0	0	0.195195367018199	6.6556206962951	0	3.39243745874083	5.38718535710349	3.25020823890608	0	0	4.56207772301727	11.9364259131041	11.6351084732419	5.91459413751297	5.31425605249385	16.5524717894354	0	0	9.76962498331066	24.6210780933716	0	8.74402485441264	3.14808730003844	1.75491810756693	2.5973869346534	7.11370366667315	0	7.72804670443419	12.3098807225149	4.76457927168868	21.1290479625221
ENSMUSG00000002416	Ndufb2	9.03281420614537	9.97081949748557	8.60541050154501	11.2756175413161	12.7867248148403	7.4383584859411	3.56520985228059	11.2934539443635	7.30497913693246	6.92209087128503	3.53544424713922	4.38172604033886	9.45132263043948	7.48255594639452	14.9691037582646	14.9009710711229	12.2892049419675	13.0184662943589	5.41600050145551	4.32696936717421	8.23232916871111	12.5263579670566	6.62886780184172	4.31069675091799	8.59403147697248	5.03519921078566	4.51896072519192	13.5648909044327	7.49409663202488	4.15231202868454	7.18506958487163	10.9364007146575	11.2843963890683	5.01430669847308	12.0101714430195	7.96734650347557	8.78765666326731	6.44289976004742	8.73117562754769	9.74569111027303	10.6059794017341	8.66324460188178	22.0268405422206	0.804810543454906	4.40536534505726	7.79049193922937	11.0991041614981	3.57620101167866
ENSMUSG00000002428	Hltf	0	37.0126584293908	0	0	4.47918295080007	0	0	41.3350696719345	0	10.210376099908	59.3133451931991	38.6477850634769	23.8149452935066	0	0.27467012991045	38.964824443799	4.53215209390671	0.602604161718722	30.7682407424354	0	20.242647652832	0	14.1661995596263	35.7277338734484	27.5928905256178	38.9587788124973	0	16.4260742666727	0	19.5717175538454	0.0625504797892237	0.08171407302362	3.19510060109815	0	15.3220978861331	0	10.8929188621488	1.37387597254369	0	30.1060028621151	8.2791845543913	23.0178509078223	0.475035095153422	4.73490763431093	7.09863319551701	0	34.6820677710993	0.962336336981813
ENSMUSG00000002455	Prpf6	25.3612986580865	42.8014905248129	28.5865834904049	0.411111528391596	16.2954539058243	5.53708591492007	0.495193698062295	17.0134565610704	16.2668583892343	77.36351495632	45.8894983114293	4.39991195591799	0	1.94620086761633	7.59866124098984	22.7227316028758	0.860915049770033	49.8273221647243	6.54764256419741	49.682593421416	5.63764801045851	4.44916767545578	33.7959794594026	51.7675275839179	29.6170971214389	18.8291779843999	0	15.7231813981673	29.5305529841707	13.3028365500979	3.55701351083332	30.2668375931186	31.0564503451844	20.1425755310849	8.66056087420018	0.938961548557574	20.7826975343851	23.6493221050412	46.1240171511886	19.8154871021118	41.8507621353776	2.13815514905534	6.20579988844702	51.5273120297924	42.6705298029979	0	38.4570898311995	32.5388882928378
ENSMUSG00000002458	Rgs19	40.0105640915897	75.492070132532	0	35.9269995951525	29.8579482776673	29.5278648887815	13.7108698175598	16.2868824596741	0	0	30.5154180996934	23.0233402755895	22.4024181408671	32.8369032261352	0	7.59481345828041	21.669930221362	0	0	80.0819191578538	27.8224155916239	61.8273486314678	66.2159370792041	42.8368240692961	31.6426547990093	18.8985841920375	0	43.4319825370626	44.7373527849209	30.2358401025424	0	0	27.3308309071441	80.5919917389612	25.0906663859386	14.2175831340727	0	9.6831456241547	64.8821622044702	50.2688942398371	0	50.1190365801256	0	29.0455042428109	32.9347931079721	25.7723560628793	26.9410456466757	18.5898305503942
ENSMUSG00000002459	Rgs20	0	0	2.44824842294486	0	0	0	0	0	0	0	24.5960831252639	0	0	0	0	0	0	0	0	0	0	0	0	0	0	0	0	0	0	0	0	0	0	0	0	0	3.99414999847618	1.34558171153801	0	0	0	0	0	0	0	0	0	13.6062679680003
ENSMUSG00000002475	Abhd3	0	0	0	0	0	0	0	0	0	0	0	0	0	0	0	0	0	0	0	0	0	0	0	0	0	0	0	0	0	0	0	0	0	0	0	0	0	3.32251106754601	0	0	0	0	0	0	1.19215068191787	0	0	0
ENSMUSG00000002477	Snrpd1	693.721364391132	512.738508391967	1340.03137038236	1532.45948058432	1024.10388023784	643.95122469598	268.834712803868	988.854453722353	642.769469599468	679.730212212385	362.291037750285	1008.49676784176	342.229801414305	932.549599806386	831.356022545083	1049.59285818169	935.302149554268	661.433231016146	632.510392462003	635.463098205535	606.49058425534	1077.24060885771	466.326803871496	817.925738750459	487.622147556981	589.888788930736	513.727900556343	398.875860143248	1059.16772352321	642.622437370017	321.344682594584	371.156742070587	428.94666625478	233.647836867416	464.798896170457	369.596495915256	396.583832403877	779.798706441868	1156.55843692618	179.37089438498	486.55502512527	470.495153481851	408.982231357976	447.535816223728	347.636266377065	416.943385408246	460.142410016379	670.787639222822
ENSMUSG00000002486	Tchp	0	7.63400047537188	0	0	0	0	0.0645853886988778	0.0944243193318319	1.97218858739251	0.312871239667075	3.9811100080967	0	2.33222572032256	0	0	0.0738592106301391	6.94121818551298	0	0	5.7482338310259	0	0	0	0	0	2.30843889317599	0	0	0	0	0	0	0.0692396905433287	0	0	0	8.85453800972108	5.2325506783147	0	0	2.40563906007983	24.9459930582463	0	0	0	1.36169723075774	0	0.974668276266618
ENSMUSG00000002489	Tiam1	0	0	0	0.0800362924055681	7.80386942353388	0	0	0	1.56113581888806	0	0	0	0	0	0	0	0.213315767048898	0	0.121401197588239	1.09203841291747	2.03250444440328	2.15231579372457	0.126528686787247	1.07093260770334	0	1.17302872108646	0	0	0	0.463850474417792	0	0	0	1.84830813479129	5.56968519689297	2.42209399457465	0	0.493297854494396	0	1.00987750042194	2.68178233242241	0	0	0	0.0944001468236447	0.657600993400469	0.0401443922379956	0
ENSMUSG00000002496	Tsc2	2.87590639411578	2.23790981840948	0	0	3.35579787862146	1.49588713990268	1.93677616299567	11.2537200587445	11.2585155620579	5.53317015340948	6.0809347042957	11.6825916892702	11.7311216370256	7.30517506983381	0	3.03835832486133	2.19768458131146	6.0186625350406	16.092792998914	0	0	5.73284771094276	5.21424455196844	3.07355590973393	0	19.0718336331126	1.78298268597405	1.8655250173144	10.0754132286139	1.91152684072962	0	0	0	10.7562612296976	10.3443115578356	0	0	0.296461583950604	4.82423168942742	33.2520076068142	0	0	23.4297974998333	0	10.8440107953596	8.376278100553	2.39880687581132	1.90482889644921
ENSMUSG00000002500	Rpl3l	0	0	0	0	0	0	0	0	0	0	0	0	0	0	0	0	0	0	0	0	0	0	0	0	0	0	0	0	0	0	0	0	0	0	0	0	0	0	0	0	0	0	0	0	0	0	0	0
ENSMUSG00000002504	Slc9a3r2	0	0	0	4.56894817120541	0	0	0	0	0	0	0	21.852329778491	0	1.18842793026955	0	0	0	16.7855028805625	0	0	0	25.011387863547	0	0	0	0	0	0	0	0	0	0	0	0	16.8043069290914	0	0	0	37.0121382074104	0	0	0	0	35.3206636237174	0	0	0	0
ENSMUSG00000002524	Puf60	22.7605480005876	47.9217215344219	13.262779635608	33.7063512160386	40.5038817835184	11.8422588275576	36.7843089359583	29.6788306015896	129.23105109461	95.8749765462142	14.6211516014917	60.44647642881	51.6717461658126	57.8447361363386	25.9491063730766	50.8808668915582	18.6232453433945	37.3390673351844	72.9100038583615	65.5763958151041	112.369612152229	56.7656980089833	96.3556576507963	52.6825158329793	58.5300596552974	95.1799907831876	46.8631571321961	42.7749115740419	51.0495505128539	32.3127428571899	81.1904228455181	79.277583883956	160.685943486237	80.8289039212618	77.0231863929774	73.655646225431	83.2752066459662	37.0976140902497	78.8457703485657	35.3029427507245	47.9999174545348	71.8949234987328	38.7059506141415	93.3389955710517	69.6468901771279	150.680128454582	55.4222962176542	68.3340032289064
ENSMUSG00000002546	Golga2	0	0	0	0	0	0	17.1985723274016	0	0	0	0	0	0	0	12.9056079182379	0	0	12.541649811794	8.53183336410627	0	0	0	10.7732217721568	0	0	0.0660561798561812	0	0	0	0	0	0	0	0	0	16.1408343798455	0	0	0	0	0	0	0	0	0	0	12.8042144818776	14.0369140800216
ENSMUSG00000002550	Uck1	22.3763498410946	15.5232480994989	1.81638496227934	11.245491845595	9.77910323286638	0	14.0664441063808	19.5496783487867	28.9249112341477	3.22483320464069	41.5163709485436	6.61289150875819	11.4968017802911	0	0	13.5045029117112	5.48936118611836	10.393443208008	12.8295455831988	13.9104751302394	6.88313429864488	12.4822523152191	15.1568005599362	27.4210495133538	6.38239167096712	14.6591413312245	0	3.83130506461077	27.4196806307381	0.835554716822017	32.0955584005499	18.6741162169857	2.04791926588114	17.2770969249117	13.1042277729434	12.8421166866106	21.2170449167175	1.33289941000381	10.1219430430298	5.38464774332575	3.27512888338151	31.6292364278685	0	18.6052538152583	5.44151133504409	0	16.7768245331188	10.8105007681278
ENSMUSG00000002565	Scin	0	0	0	0	0	0	0	0	0	0	0	0	0	0	0	0	0	0	0	0	0	0	0	0	0	0	0	0	0	0	0	0	0	0	0	0	0	0	0	0	0	0	0	0	0	4.14887242285104	0	0
ENSMUSG00000002578	Ikzf4	0	0	0	0	0	0	0	0	0	0	0	0	10.4914091232782	0	0	0	6.24704869142099	0	0	0	0	0	0	0	0	0	0	0	0	0	7.61157433902851	14.1473026260285	0	0	0	0	0	0	0	0	0	0	0	0	1.01441185297739	0	0	0
ENSMUSG00000002580	Mien1	44.443726122721	23.1506557421349	68.4362454076462	25.4856126596493	29.2612172788655	0.583766755339086	35.1748281275876	28.0504694818297	24.8552885156619	11.876192966488	72.9840640036743	28.6830111751144	22.6132101099292	59.9653369543865	13.084887875493	26.3294737846332	10.107920095724	26.7933782940575	39.7310744881664	0	23.1913926796434	16.3676704555686	23.9221791970078	8.11934448265276	31.0438524937015	43.2858099593048	0	11.8216117520558	13.5724873355718	9.23136958223843	24.8317868560834	23.3564417881007	26.7395898889038	92.7892278790227	55.2971659745985	32.1357076040554	51.295827469333	27.2706104188641	13.1563738773329	0	2.41228368358301	95.3947144236868	64.1182912169131	0	74.5223445549719	0	46.8710231451514	59.11503359064
ENSMUSG00000002588	Pon1	0	0	0	0	0	0	0	0	0	0	0	0	0	0	0	0	0	0	0	0	0	0	0	0	0	0	0	0	0	0	0	0	0	0	0	0	0	0	0	0	0	0	0	0	0	0	0	0
ENSMUSG00000002602	Axl	23.2246726476533	0	0	0	0	0	0	0	0	0	0	0	0	0	0	0	0	2.34340342428121	0	0	0	0	0	0	0	0	0	0	0	0	0	0	0	0	0	0	0	14.5710561371765	0	0	0	0	0	0	0	0	0	0
ENSMUSG00000002603	Tgfb1	0	0	0	0	0	0	0	0	0	0	0	0	0.285129473311285	0	0	0	0	0	0	0	0.55933780578884	0.309569399942012	0	0	0	0	0	0	0	0	0	0	0	0	0	0	0	0	0	0.317616688827667	0	0.74385531717253	0.279396385298983	0	0	1.88020149164244	0.157822717759133	0
ENSMUSG00000002608	Ccdc97	0	0	3.41536559636508	0	2.98800759957013	3.32120157074103	0	2.83709241979207	0	0	11.0120606463369	26.3764665985873	19.0697617496204	0	7.08984241322544	0	0	0	0	5.69166555330083	13.5010307407945	0	0	0	0	6.17966546763208	10.0603484204613	6.58098667640796	0	0	0	0	0	13.3232449169782	0	14.4882911145387	0	5.1716542226178	0	0	0	0.190429982695298	31.1140751451994	15.9836722432197	0	22.1115203790078	0	0
ENSMUSG00000002617	Zfp40	0	0	0	1.41586736998052	0	0	0	0	0	0	0.0887883990312339	0	0	0	0	0	0	0.0797421973037425	0	0	0	0	67.7095598324666	0	0	0	0	0	27.416424417855	2.13689110699964	0	181.336818882616	51.7651035028778	0	0	40.1191066629245	52.2899326528472	0	0	0	0	0	0	0	0	0	0	105.36148844046
ENSMUSG00000002625	Akap8l	3.99993535104489	16.3282992336364	0	0.76456837978948	18.9612687967048	3.99296460651934	5.52564572767922	24.2356056323009	0	20.075929675524	0	1.55862400347791	17.4939642467452	14.2193254095432	0	0	0	32.0372251887516	34.9848218060665	27.5702671453169	26.5999880688375	0	10.8782962243236	30.1430663918484	50.7700033354136	0.175088669498312	35.6300237620904	45.989883138643	0	12.9239174151338	18.2364642671076	0	28.3851031128363	73.0118667368082	25.5171285897329	0	32.6384613851384	29.4522592523732	26.5758752322125	106.50429957568	0	18.4362837559883	19.0091875137201	35.3626383444531	32.4641877456281	0	20.3249800365793	25.1902428851543
ENSMUSG00000002633	Shh	0	0	0	0	0	0	0	0	0	0	0	0	0	0	0	0	0	0	0	0	0	0	0	0	0	0	0	0	0	0	0	0	0	0	0	0	0	0	0	0	0	0	0	0	0	0	0	0
ENSMUSG00000002635	Pdcd2l	0	4.1011807105143	24.3181086090573	16.8992316998336	21.0581371883529	0	85.4315424770504	0	136.701794547243	49.0551739061781	0	12.788338892319	29.4670910528257	121.732997582228	0	15.5189216044998	0	23.0732426284941	0	102.312759643878	78.5478859605067	38.9624433145867	29.9541350198135	23.4931581479985	0	24.8616868019068	40.474234868802	18.5740049117507	0	13.6027121184372	49.0976847024703	42.8641219452056	60.8383100933612	58.1714778523686	0	115.791416711583	19.5596773021772	46.8181276301444	0	96.9228138155119	29.3737196699947	19.3700116678316	23.6453395362262	0	0	0	44.4362139215261	100.650780700544
ENSMUSG00000002658	Gtf2f1	77.9471967887988	15.4162515059859	29.5500875463654	31.4154334269935	25.2649852662812	12.6987118881275	54.2568045661572	24.0005502130204	40.4221563334208	30.1026351209013	59.3331967042782	26.8413299375874	96.4973955801928	48.2716999495093	33.2075707148868	42.4787033009069	38.8744602176537	38.0926200825355	17.0518599609171	33.9941363523211	105.824255659463	19.9992289569992	40.1697261567633	86.1025272324996	92.226509980165	56.9191136268026	44.0924137971402	25.8815274332683	48.1836738519071	17.180455154364	73.0306177768791	4.23395020765659	91.2771072978421	5.19029851926674	73.7038876755411	27.1706187708226	75.7733951248174	91.1184631034401	19.3974143683566	25.4157170373517	190.876161286482	35.823240274092	34.458996002594	53.8155295670995	0	83.1637375119227	12.7448508624884	32.1920575634859
ENSMUSG00000002660	Clpp	78.5060495662998	56.433613259377	53.5004145845847	49.2899561328657	46.2487982284606	81.2896415937173	105.680263541752	0.578671657081657	149.431794939231	35.7915712095476	110.779674480435	45.5513353129109	13.3995497513665	112.891398013101	13.6896516008309	60.2011311326773	43.2893660941344	95.051245724304	176.776102531352	177.418888672491	29.0396219505856	63.7960892977432	69.6103807689672	141.013488893703	17.5659190438973	78.5614301437846	0	59.4742358461127	69.2149625906365	120.929411888619	136.161718942866	133.709340219825	102.6877960312	270.313833445912	123.824502728357	131.338899705808	195.646818494669	133.332272796059	130.277531550856	86.5723887868754	241.109452965448	98.8123352046793	199.577907431523	251.804215292178	187.585057954377	17.1809837008151	58.3456335131127	170.484346488807
ENSMUSG00000002661	Alkbh7	43.6905798892274	15.777212522783	167.720482097816	37.7733187634088	31.3729597593183	18.2227132636023	61.284190347074	79.4163583492853	5.58493467480199	55.8522797882711	38.6734309482984	93.1113118695762	0	117.561623830601	25.3305118056191	62.6508421396253	24.6550736702231	16.6719313499883	84.9689616801925	52.5908294967206	122.156953996619	41.7136493187168	29.8577574940098	19.8929857714557	39.2773907144384	74.497761635664	5.17310549082246	19.1015810695073	5.51763158621612	26.4336544937469	139.52568377917	31.0851768987405	129.907991873362	13.9531656500296	25.5454440216605	95.956349643178	102.621217250246	64.93426513497	20.6934801948137	138.120818148574	29.9891520765551	9.47652878899721	72.5578021942723	50.6209407128168	36.3692849434069	49.5188246595032	67.6651482093153	77.0707809863809
ENSMUSG00000002664	Pspn	0	0	0	0	0	0	0	0	0	0	0	0	0	0	0	0	0	0	0	0	0	0	0	0	0	0	39.929680638022	0	0	0	0	0	0	0	0	0	0	0	0	0	27.0866632287133	0	0	0	0	0	0	0
ENSMUSG00000002668	Dennd1c	0	0	0	0	2.4019922315728	0	0	0	0.70169692068025	0.306125470875312	0	0	0	0	0	0	0	0	0.159154400700666	20.2474693562374	0	0	13.5603981951961	21.5108258179923	0	0	0	0	8.69026974829039	0	2.50268937528097	0	0	0	0	0	0	0	0	0	0	0	0	0	0	0	0	13.9471839455468
ENSMUSG00000002679	Med6	40.3903861215062	24.878228898865	85.5347275560157	54.8196056690798	86.9165951936089	49.122338560361	52.825224072492	3.8615435527163	0	65.8413054912332	23.3764453206145	101.416254752907	60.8530730972179	114.743086254649	0	111.38168030697	121.269055341669	56.5622923180515	47.1193816587184	107.654918113864	0	104.991449674321	80.1640551929702	197.264089382854	52.4282213360654	38.9169960797474	199.060288940906	94.2980218435997	65.302142176741	56.1282581786688	0	11.0527460362142	41.0582273324701	83.4855710684851	47.4912225035722	99.5385221018494	58.5044984227386	29.0010785934737	0	0	39.3831984834171	26.9560418075415	81.7776035058105	31.9285640175224	35.5618466028354	0	0	0
ENSMUSG00000002688	Prkd1	42.6012824395265	1.35259003084547	0	0	0	36.1703671421308	0	0	28.0755603412607	0	0	8.41072424543071	0	0.0734268228474779	0	0	0	0	0	45.077236856606	0	0	40.2503495152617	31.131007024406	0	23.0735520110833	0	0	0	24.6452044486122	15.0304025604224	0	1.12163370588339	3.38828913738366	0	1.85983401444892	0	1.00377943523692	22.2700350042398	0	13.0720946231501	19.0965355244513	0	0	0	20.5987705644225	0	32.235736904614
ENSMUSG00000002699	Lcp2	0	0	0	0	0	0	0	0	0	0	0	0	0	0	0	0	0	0	0	0	0	0	0	0	0	0	0	0	0	0	0	0	0	0	0	0	0	0	0	0	0	0	0	0	0	0	0	0
ENSMUSG00000002718	Cse1l	204.361701112989	53.0766170852057	54.7440976302219	119.294344275943	120.532361933276	65.6632980074356	62.9675694183371	169.415153922773	40.0737740742747	156.028198940844	131.392046531645	235.522777540527	249.191587948804	144.058831158111	96.5674722064301	144.121787258546	198.81046248615	166.400173907499	80.8527294558917	154.015929428918	46.5305833226812	151.851980493535	93.4038761127324	63.6219661573029	53.9676572327787	73.5850560355032	330.557156921338	126.521612831749	133.669412425186	89.5090961503293	110.529188893334	162.038913825668	159.778694312746	50.0448699158256	250.67768925788	134.1701352648	122.606595042158	32.5289302438738	70.3066340418026	44.1887154764942	64.5027410053842	89.0508092831071	64.9190456375168	90.5379351497569	30.6957661566967	0.112364592272676	36.5953858644653	134.562277702473
ENSMUSG00000002728	Naa20	161.666302947821	51.3438429779008	48.345142002562	91.4206071124121	70.1602157357109	97.689939535165	44.0989034035938	110.659669929087	23.266792633082	33.002060884485	29.1077848334994	84.6726170850248	88.3720900702253	59.0029608225093	27.637947091556	133.081987687072	51.845527385886	77.0759023276609	27.7121962159282	18.4664074585044	10.112853408954	94.577754738721	30.7160169199509	82.1578224328427	104.7942786065	62.0714143506868	94.984546477238	49.130167623909	101.249656536537	13.9591762711176	81.2065782336943	121.52126565149	15.6207171328576	29.7993490829294	79.1577811550548	46.2100232390023	47.1413532400589	36.6185782040641	58.3567741700645	52.0840791041366	39.1522431543155	69.0378845685133	68.4396716442498	44.7445988748853	52.2723805722031	65.8864723244737	41.344227399797	26.8374339888565
ENSMUSG00000002731	Prkra	56.785324810738	65.0865827388617	17.2475962616436	136.11805400542	193.675428849499	101.49251364126	117.314390464689	97.8114891458122	114.004989346615	93.9569714455764	24.920907182527	174.225996148137	228.793274226606	149.324270009869	4.81972940975999	44.9892549468443	164.862569168381	104.331104912575	72.9755888183115	39.8359974020647	53.2409528105808	0.12827489435467	44.3670375780071	44.4867411918424	52.1099798695521	215.513172592911	24.4982766932243	116.726287560777	50.1933068630711	53.8382760029216	24.5129408355053	94.6350503810769	61.621549206882	0	53.6983372112125	64.7683221527531	173.345767862471	76.7433704680922	61.6526622994247	18.1620990811584	67.529669272374	19.9731754926953	84.7452771748776	162.596493179228	182.229754828309	120.953834789094	29.6245225799245	194.194063219971
ENSMUSG00000002732	Fkbp7	0	0	0	0	0	0	0	0	0	0	0	0	0	0	0	0	0	0	0	0	0	0	6.33346371085055	8.42381990075224	0	0	0	0	46.9723222309389	14.4469379859408	0	15.0126085432607	0	0	0	0	1.80023411414573	0	28.3105674915941	0	0.758407370217385	0	0	0	0	13.9646109945345	0	0
ENSMUSG00000002733	Plekha3	0	0	0	0	0	0	0	23.4606373833154	20.0811921062237	0	0.127303136422902	0	0	0	0	6.90348526894754	0	0	0	14.9621414628626	0	0	17.7513251128014	18.6746871120323	0	24.0578889207493	1.13523684155605	0	1.42706498319121	0.24510674194683	0.712066978176364	23.1005370756112	38.5025616996211	1.42542267395729	0.120127327932953	1.15913391423022	0	0	9.60634145073972	0	0	0	31.5451568225922	3.62241981651009	21.2500287002588	0	23.2918765448342	44.0126696485289
ENSMUSG00000002741	Ykt6	13.9072819259687	32.0522329736182	32.5894355253998	8.77242288975949	4.28237220910433	0	21.4533874355061	9.83082472657424	0	30.1180682773371	13.469473877432	12.1930727483872	6.50399056966462	20.9440907640107	3.11962569992125	3.8448619978733	5.06073479323446	0	2.41931756561067	21.8919902343671	10.9361680658643	18.3075442385277	2.6265621119898	0	7.21626894787284	7.79214990260582	3.17135868338177	1.33648724058419	0	2.82447735542349	0.124325367168192	17.3783980831202	0	3.15242606110439	0	0	10.004149530101	14.3362622533754	0	0	6.18976310129832	0	36.3509303787418	19.7329619977663	11.6009365419766	2.77981867652598	8.26675818739544	33.0199364188238
ENSMUSG00000002748	Baz1b	0.0759115556945393	8.36680475382745	0.0281243142168979	9.11236057386104	0	5.71136344162253	1.15353464306613	13.2873885582327	3.6874129540686	9.70856984679849	9.0264416025446	1.30151433670094	14.5161298757663	13.384914128468	6.53881946661477	8.61458500125928	12.3090459808553	15.6905478151185	4.66598267891586	8.31517695613254	7.92972381143099	0	7.61572712549338	11.6492424178106	10.8350894671413	2.39246425907732	11.2518608734311	4.8564433449469	15.9049252923517	17.0429441208049	7.35621926653245	8.61703509226977	5.6961462372319	4.09350547956819	15.6065149193866	11.367200622376	4.66194379782707	13.2359534885547	17.058427108603	4.74556563073816	13.2507923552696	15.6420249523291	4.94756680943285	0.265133459490113	9.34436088611897	4.63871654135941	4.86167183256159	5.73678429648371
ENSMUSG00000002763	Pex6	0	13.6671811164711	23.8968652705356	0	0	2.75705226283433	0	0	0	0	0.314501794882501	0	0	5.58219876846288	6.80515610399576	0	1.98909807995411	0.847376384309369	41.945318397517	58.449802572106	12.6298948064765	20.5591269034197	0	0	1.30907107930124	3.34979310387642	9.50446840397596	5.62821474564846	0	0.10092250728738	0	0	23.6114458419588	0.91298147030598	6.82580186279512	0	23.8272556585792	0.536647681319586	0	50.3081490778424	10.9181891379451	21.5388049262932	9.64874366217448	0	0	0	0	0.0791361656957342
ENSMUSG00000002767	Mrpl2	124.734451215899	92.9079063409634	198.429488419671	67.798264447144	20.4066690443023	20.4991941394071	6.53317087460649	30.4455480298937	112.97320422952	142.418988296453	141.493192696174	20.0406408994195	24.8819331536913	80.0099454425479	29.0407822848396	43.8937082195958	14.4558808015154	21.0777029519323	124.434256055506	98.1223514956121	102.270307861519	83.8233676309649	61.6294738017381	0.647986146211711	0	93.1561510792299	95.0377591083177	22.3994608780889	94.2807612578057	64.505181213325	94.8077622165263	98.1719159003696	262.211477417481	150.644840954361	27.2812241923631	45.293157698546	157.658964534993	110.735460214692	142.330600301146	50.9854868408751	185.588117395042	207.721025124031	140.871657467747	102.590644505942	106.754342448787	71.9100737586691	101.338101964351	138.133056512634
ENSMUSG00000002768	Mea1	79.0463414611252	34.452630389425	91.5178577148438	49.1053143924315	35.2292193964011	99.6740037116107	171.189493073673	0	93.6765389108134	56.9393375828079	48.7962014990155	111.654999296766	68.0303648527512	214.263227822967	85.3321616451793	46.5036494568172	0	52.7597160846504	8.11687443573399	69.485633472542	86.8117007208345	51.0992204154281	88.0803846073288	112.819016527932	31.550690901762	67.9041801259672	124.628733116398	38.6599390776333	145.320621901967	85.2857662416206	43.2818044901533	41.5411000374078	79.2637843135361	57.1718933918887	147.077893954711	104.605626113309	75.850935577265	108.161084623448	53.2989765530522	112.004311336678	129.785169826201	241.997741902104	233.109052238296	42.5986220650682	32.3004711903633	0	79.5742142941548	52.2125347705084
ENSMUSG00000002769	Gnmt	0	0	0	0	0	0	0	0	0	0	0	0	0	0	0	0	0	0	0	0	0	0	0	0	0	0	0	0	0	0	0	0	0	0	0	0	0	0	0	0	0	0	0	0	0	0	0	0
ENSMUSG00000002771	Grin2d	0	0	0	0	0	0	0	0	0	0	0	0	0	0	0	0	0	0	0	0	0	0	0	0	0	0	0	0	0	0	0	0	0	0	0	0	0	0	0	0	0	0	0	0	0	0	0	0
ENSMUSG00000002778	Kdelr1	22.1447861617346	0	0	0	62.8055599504095	0	0	25.3442128744045	2.12306378882445	0	0	1.29434824194904	0	59.256386402775	15.8957747510182	0	20.4680527547756	5.14937153922897	0	0	0.429971217683691	0	0	27.1054610467108	0	0	0	20.521059612629	0	7.15505032988331	0	9.05155594909721	0	17.4367072453559	39.4754809724262	10.8761584654993	0	3.69593897234958	0	0	54.6891035081784	42.0282223547822	33.8272389863855	0	7.98804572182832	0	1.91080023651919	26.769982813142
ENSMUSG00000002781	Tmem143	0	0	0	0.633072381509645	0	0.464031674635059	0	0.371618350677074	0	0	0	2.25848101062617	0	0	0	0	0.120520611516453	0	0	0	0	0	0.458708564852105	0	0	0	0.786723057263502	0	0	1.32490659473733	0.14803946353946	4.44806937085837	0	0	0	0	0	0	0	0	0	0	0	0	0.684463847224034	0	0	0.319660425624908
ENSMUSG00000002791	Pdxk-ps	0	0	0	0	0	0	0	0	0	0	0	0	0	0	0	0	0	0	0	0	0	0	0	0	0	0	0	0	0	0	0	0	0	0	0	0	0.15890083568155	0	0	0	0	0	0	0	0	21.9756931118394	0	0
ENSMUSG00000002797	Ggct	0	0	0	0.614517516357587	6.33915057628768	23.6476412937488	0	0	0	0	0	0	0	8.00009173299991	20.0722638578484	5.50216311432264	0	0	0	0	0	0	0	0	1.83926881112273	0	0	0	0	4.10554583938286	0	6.25753605039497	0	1.53419282248005	3.68487670251764	0	0	1.36772058245366	0	0.051692167368273	0	0	0	0	0	8.6445874681836	0	0
ENSMUSG00000002799	Jag2	0	0	0	0	0	0	0	0	0	0	0	0	0	0	0	0	0	0	0	0	0	0	0	0	0	0	0	0	0	0	0	0	0	0	0	0	0	0	0	0	0	0	0	0	0	0	0	0
ENSMUSG00000002803	Btbd6	0	0	0	6.48517822142862	0	13.1347519951294	32.890748379043	0	0	15.4353625977491	0	0	0.309299226427603	0	0	3.76135339780475	0	0	0	0	0	0	0	0.978670986748324	0	0	25.9590173123802	7.23188460868853	0	6.42898953048748	0	37.3285989291967	0	0	0	0	39.8778193615413	9.46679761683426	0	0	33.3412066266652	56.4837124877093	0	0	0	0	0	0
ENSMUSG00000002804	Nudt14	20.2658980352838	25.5745930780461	0	0.499835976075353	1.90706377553984	18.4101716055236	37.6290264812224	0	24.7915225850924	20.9021777089154	17.5529126099933	25.4737303656007	0	7.43669822931368	13.4912508529928	21.1718334804128	0	0	0.252721543645671	58.4563473422905	35.0333070408364	0	19.7546599676813	0	0.626242447010398	15.3381866899828	0	13.4623208408831	15.5880915039697	24.3814023969454	85.3246483332755	40.6162194232584	19.686279425261	0	21.0592970469682	39.9561567599019	16.0030263171461	12.5795356416091	21.6744420304265	47.4271564072133	38.4637265322537	0	79.8894087718795	20.8350083752481	30.656075909764	0	18.0508614655928	0
ENSMUSG00000002808	Epdr1	0	67.5001555010725	0.700136616397712	0	17.1508370633249	29.86589000102	0	0	6.28076260149863	0	0	0	0.130931038655328	0	0	7.36409963502811	59.9648217088622	42.7062605783033	0	51.8206468570965	119.910905756713	0	5.36787006313071	0	0	0	0.215467538962004	0	10.9327497986993	17.5850023845263	0	36.9001999725122	0	0	9.84965317031895	23.1003354382384	0.324632381239393	3.85901490386287	0	0	44.1467686912769	0	0	31.516556796567	0	22.6638768599823	0	28.0155287996859
ENSMUSG00000002812	Flii	14.4809791548524	5.46308632451058	0	11.0194043624154	8.40864119169364	0	0.7584649655973	10.8115939328457	19.9146014341105	14.6203921057457	5.84407039688258	5.37526548133352	21.8253908591617	13.6802229117865	0.0923691515039195	1.78895685394201	0	5.74514125690519	3.82046364531705	0	4.63727243426035	3.30403950944261	18.5403697556572	6.4695739265551	0	0.720994223474889	0	0.0565315953548496	0	15.5095802506907	3.8284021775658	2.11593881251597	6.30170498885457	38.6134244573365	0	7.82001333552986	15.2969883275322	17.8687170558405	0	0.079451445974851	9.20835080862077	18.6074544015871	66.5359287107043	0	0	6.34945797438111	2.44770851668863	13.0557241140783
ENSMUSG00000002814	Top3a	0	0	0	0	5.26464050755683	0	0	0	13.7455698160652	0	0	0	0	0	0	0	0	9.01476957699138	38.2842640589548	0	0	0	0	30.2499207786308	41.5633530829147	15.4834881245843	0	0	1.49908255424593	5.24797037894377	0	0	0	18.839300180917	1.06147735432471	0	17.4386670548363	2.56909429660297	0	0.17410560394315	0	43.3849934091288	0	0	0	0	0	0
ENSMUSG00000002820	Atg4d	7.61735118705777	0	0	0	1.11105367539711	0	2.76225234700374	4.51919939903433	4.01659663572203	8.65529311789255	3.39659629355664	0	0	0	0.448532087141761	0	5.69622486055229	0	0	0	0	25.7133241697979	0	0	0	1.25037510052656	13.0277179394427	0	6.47622892401964	0	5.72006226742115	1.26765930272009	0	6.679444831765	0	0	0	0	3.90851525706008	0	0	7.53821176130023	0	10.0391694921371	2.44719125113074	0	1.42409799810574	0.0827094947634932
ENSMUSG00000002825	Qtrt1	25.2403421796801	30.9461649845551	69.9394961289617	15.2778045479981	9.37422208976715	27.4065620950577	30.5093781783606	32.2146775463142	35.6254336262244	38.3176615749452	36.3055898643884	15.5724154427564	13.662152855127	94.7567380393818	30.5501956403743	6.50730342333085	48.2198507475789	3.62295517805751	0.203278808801662	0	67.5896012422421	0	29.5550939613791	0	104.438703638828	0	0	25.1222054560553	6.98862713327627	33.9801427222537	59.7941372581367	107.835614474535	122.265677514942	160.599066195073	27.5976249022653	20.4312774210369	131.883344581157	65.8732444859847	0.553461242685571	26.9880011269881	42.1267810056938	81.7396329928573	141.371455542899	32.1402089913325	104.798564618541	3.60364011183268	30.2486876434952	100.641147984007
ENSMUSG00000002831	Plin4	0	0	0	0	0	0	0	0	0	0	0	0	0	0	0	0	0	0	0	0	0	0	0	0	0	0	0	0	0	0	0	0	0	0	0	0	0	0	0	0	0	0	0	0	0	0	0	0
ENSMUSG00000002833	Hdgfl2	0.567395806222186	2.67809418081426	0	1.13877724737922	7.0345465682649	6.34972055022951	12.3451606123678	40.5379908321595	5.53039636212921	12.7359747788691	2.61164629668903	12.3535576362614	11.7197511231155	10.2318380226213	9.78433876720584	8.29140832573919	7.2471050733895	17.7382887309927	18.424831031073	1.5062160252701	24.4572143492631	4.16141014942557	7.13683682511656	0.0777423903884025	0	7.00390586251962	0.97039933461969	4.6152899939405	6.48740399585255	6.28551005189327	19.477572863259	12.3248820182082	6.51236493823588	26.3997478006911	4.92886663978225	6.22362913413162	4.84302112229421	17.0455856460618	32.6966650216407	10.920288396954	9.14661686074724	25.8444261502418	43.3362358904063	27.7750748119504	17.6528274560216	27.0974496302302	0	19.5913620639787
ENSMUSG00000002835	Chaf1a	19.9676841243811	0	9.76042932339688	18.7039589281934	10.470594915139	1.58188790654763	22.2405291752304	25.7592854268145	0	38.9449344507757	32.8416692917266	6.11046101726245	1.8470063237155	3.00013385818862	5.62815180687123	12.9647586490159	0.36520514203172	24.0934733416954	13.2153962468135	55.9715549781225	0	22.3337914006532	7.20268756959486	0	0	39.3182037898491	0	7.23351498047743	9.07206716971871	5.21148207219778	49.3452944610489	17.4343693728137	9.4444151898093	10.7759885823229	0	27.3840131188307	27.8810442119017	22.1693245279351	15.6798682017488	0.121026552680555	45.7575503559452	32.4258855388934	10.220434640949	53.9483873335641	22.0606979151128	0	0	28.1512316638791
ENSMUSG00000002844	Adprh	58.7666854750864	0	206.149322198098	34.0747310133593	31.4398477815468	30.302030502977	49.7958242791686	3.52978744205969	27.6467700207373	38.2550477880948	65.3612742634729	1.78766690228338	0	28.9747438031422	71.8901287161764	55.392938253631	37.2045528930798	12.4177189244129	38.5107401417456	73.9876227610054	74.5702641023994	45.8493206093521	27.726407780287	0	0	44.065272222443	90.7924130458119	37.789746613107	34.5854070841626	41.8677308374484	0	0	56.2961986261064	43.786199131794	9.01433040461123	0	73.4621751033029	24.7078965806391	0	48.8115454198256	52.9323309482613	0	51.6143786047337	0	148.348429341412	0	0	61.6742183315397
ENSMUSG00000002845	Tmem39a	0	10.603398703145	0	15.3067747504874	15.0315195341708	0.106515331274621	12.0193029753729	19.2783600344466	44.0557343653277	0.847939140138259	0	11.1583525652016	0	4.84828666482069	7.78778665811801	31.0934106937605	19.8448049613587	0	16.0662752128899	16.8061998609085	18.0086943496434	0	23.892040437317	9.35179810672177	0	0	12.568852055987	5.07937903187478	13.3729114348387	0	0	7.22115686206363	21.6425785134776	0	42.1930367548775	21.7947046082402	0	5.17488808554156	32.1405650547496	0	0	15.2072807162806	0	35.0718899639681	54.6185552968796	1.30251256851109	11.4677055284688	0
ENSMUSG00000002846	Timmdc1	10.0801808757881	75.7690326539826	49.3396163397627	76.4782664649286	42.9773497936121	22.2436730536351	39.0974022141354	89.2646442501366	7.9294898659831	30.4855667913161	47.2899754176536	25.3800601463192	33.0395375458831	49.9169041715974	53.6152442460793	37.0553398569326	22.0085228810707	45.0762437617484	34.6214348788759	17.9837643130462	51.9411979389082	30.0387590049113	68.3598713476922	45.2591444779766	30.4541982807366	40.5260587738735	89.8459780807959	25.228872209029	39.0997188973903	19.5416296117284	42.0063637428458	54.8758552437356	34.4506271938791	49.398672622366	63.147650300181	76.6733947587493	99.651131926668	53.8967539457667	31.5229372974549	60.3675560290901	55.9329686697711	21.8640092463635	52.1161961483819	41.1308713927916	112.754466850541	15.609545553548	41.4820735950471	68.5331615399495
ENSMUSG00000002847	Pla1a	0	0	0	0	0	0	0	0	0	0	0	0	0	0	0	0	0	0	0	0	0	0	0	0	0	0	0	0	0	0	0	0	0	0	0	0	0	0	0	0	0	0	0	0	0	0	0	0
ENSMUSG00000002870	Mcm2	115.093620918769	63.1173309789294	14.0355449410862	16.9914770573183	35.2909151907333	26.8314508266232	78.0891665718468	61.7525682015526	50.7782028411181	75.6907989301967	81.6952321975288	75.7276215462069	63.5521869413335	74.6149418879606	26.2299707498381	73.2009335136604	52.6241918892757	61.9651899293187	164.152343094147	61.6267596107237	47.7829931785416	118.739105414072	45.5206322921181	58.0923865208575	28.8133645706502	61.9965167037203	15.4751908841328	22.8922159757239	50.0227718116083	46.4282416834129	96.9600598411633	63.9599168201031	132.238372591203	12.5268887781472	65.2675811940997	20.5759600815706	83.4620471616073	91.0785854036696	40.8157774975336	20.7775239925943	108.413875649781	83.1411664916844	120.093290509451	85.3671660617838	49.0934369086741	72.9124082469914	35.9777032712934	49.5773743470667
ENSMUSG00000002871	Tpra1	0.0829124296073897	0	0	7.22683010625755	3.62803909348086	16.6232867014839	4.12336905475943	0	0	0	0	15.3139199095011	0	0	0	0	0	13.2816355523575	0	0	0	0	0	0.0908827368817671	37.9652164075625	13.8494675819301	0	0	0	13.6854888064664	26.060695377501	2.7886617143309	0	14.4813739314431	7.38251695605601	4.23503512405488	10.1481670124314	0.976799136077271	0	1.91971151410824	0.0540031141104204	0	0	0	0	0	0	15.3405390795863
ENSMUSG00000002881	Nab1	0	0	0	0	0	99.5524500485478	0	12.0952256090065	0	0	0	0	0	0	0	0	0	18.829116613688	0	0	0	0	0	0	0	0	113.386901960549	0	0	11.8668130202897	0	0	0	2.65661702258512	0	12.4832361461846	0	1.29182876964678	0	0	0	0	0	0	0	0	0	0
ENSMUSG00000002885	Adgre5	0	0	0	0	0	0	0	0	0	0	0	0	0	0	0	0	0	0	0	0	0	0	0	0	0	0	0	0	0	0	0	0	0	0	0	0	0	0	0	0	0	0	0	0	0	0	0	0
ENSMUSG00000002897	Il17ra	1.27759037226478	0	0	0	0	0	0	0	0	0	0	0.746743201850998	0	0	0	0	0	0	0	0	0	6.4569867740156	0	3.41348509023786	0	2.18102833512674	12.3590359496164	5.06451826194129	0	0	0	0	0	0	0	0	0.977326359012961	0	0	0	0.0260040393621061	0	0	0	0	0	5.46601910702172	11.5832250731536
ENSMUSG00000002900	Lamb1	3.55696580387487	0	12.4417037179744	0	0	18.864136907959	3.17946112065842	26.8339214406747	14.5766444115497	3.189360053528	4.97587485658877	5.58482704684738	0	30.2929883962143	8.19004769060499	0	8.40564728032915	5.11762055266543	9.90843269059105	27.791153727845	20.0283688885774	21.4314403407067	5.69034603848729	10.1294799149411	24.3191974642602	1.39212882826882	26.6594637813314	2.12562674856191	2.2082766729547	9.8894898095897	35.6135448865233	0	5.42275174444341	20.5687088037566	0.643723551579406	14.9348215865933	0.179714810225297	2.13633072725695	6.38648622017552	16.6327119635088	0	5.4459480218058	12.642510350539	4.61305684778648	28.5387673881885	12.5466052194517	19.4181303410159	9.99619764482529
ENSMUSG00000002908	Kcnn1	0	0	0	0	0	0	0	0	0	0	0	0	0	0	0	0	0.0658436129191699	0	0	0	0	0	0	0	0	0	0	0	0	0	0	0	0	0	0	6.7144859897561	0	0	1.42835713776145	0	0	0	0	0	0	0	0	0
ENSMUSG00000002910	Arrdc2	0	0	0	0	0	0	0	0	0	0	0	0	0	0	0	0	0	0	0	0	0	0	0	0	0	0	0	0	0	0	0	0	0.158467200169865	0.919115362786819	6.97125050343583	0	0	0	0	0	0	0	0	0	0	0	0	0
ENSMUSG00000002930	Ppp1r17	0	0	0	0	0	0	0	0	0	0	0	0	0	0	0	0	0	0	0	0	0	0	0	0	0	0	0	0	0	0	0	0	0	0	0	0	0	0	0	0	0	0	0	0	0	0	0	0
ENSMUSG00000002944	Cd36	0	0	25.6963789906859	0	0	130.214784793163	0	3.30745507845641	0	37.0676162087738	0	0.112609498858519	0	0.0747153715492581	202.839453371309	0	10.2637904178686	0	0	0	0	0	15.7189865358436	8.55287563739329	0	197.138136762988	0	0	103.476340995428	51.3292434305996	0	0	30.8155582298007	0	0	0	0	0	19.4670356647333	0	0	0	0.392400160077291	0	2.47582134376235	0	0	23.0948869790412
ENSMUSG00000002948	Map2k7	0	0	0	0	7.2015854840574	10.8192759970327	0	0	15.470685307868	0	0	3.69532084919638	0	0	0	1.99757433649411	4.25942314778077	0	20.7395350675384	0	0	0	0	0	15.0543516002923	0	4.32510708921902	2.7526561067496	0	0	6.20087785853034	0	13.6434920545308	10.6027522376257	12.160938982158	0	0	3.83056283825591	0	4.07779514610178	0.0588265836914504	0	0	11.9476847112819	0	0.309479495980059	0	0
ENSMUSG00000002949	Timm44	24.5401783329776	8.57279345481884	44.7947942210155	2.3814510464922	16.7955897851788	19.7566171385255	95.0521532832647	7.0531925582996	2.05108461257791	0.842179243019416	43.3356692627561	0.220670360754413	1.17709290756182	19.6925167736993	8.44768075040356	14.9854875528465	16.9806436699803	1.17053884819446	9.85158790363295	23.7369225655572	36.8356483009886	30.6007042463967	19.3374613900887	36.003553396774	23.0559429283482	8.52744898252557	1.61424234293314	41.2055774471442	0	35.7589597381851	43.4370573758791	5.2908970207761	6.43003154575713	80.6694309024117	22.8549454277853	16.4410206711425	55.3299301799223	41.1425983278922	42.3201480672068	29.8300063594339	93.4430740204521	24.1572698735644	48.4438560069219	57.112905764647	92.5641232256589	0	51.5799014597756	13.6918525632719
ENSMUSG00000002957	Ap2a2	13.9234903068113	8.03953568736318	31.7654072266108	33.0574903392997	5.93817609783141	15.1697919740322	20.0779926909646	4.19345355170706	61.1230927074626	44.8857890670327	24.5951547872677	15.1341757710121	28.0517958485118	16.7672218059492	6.94514728044979	7.57326887002374	12.7465816595436	11.9282104629358	50.2841345106185	65.4590058859367	26.251781463498	15.618595294973	36.3164813029735	33.2014233065142	35.7431498287575	22.1975826004437	12.0108979978511	21.1773265912219	30.4356377669832	24.6922427594838	17.4258368775472	12.9227567071458	17.4550655576828	21.9440754012678	14.7209962953005	42.7897569640157	50.0397054401693	56.0449327941814	21.403791723798	36.9037164985904	42.4003691021657	76.5601164862543	32.3385404746727	26.3946023967189	52.4550510358825	49.4882196998866	6.18270427148651	27.1596773989538
ENSMUSG00000002963	Pnkp	0	0.325780970286495	0	0	10.243573024492	0	0	0.644729252397748	37.2698222916384	11.8682490247044	0	0	0	18.5696434981272	12.7461186904967	0	0	26.6128910314832	0	0	0	0	5.59488440426214	0	25.6871163464807	19.4510043453432	13.2850654753542	2.015951479028	0	2.3575497702332	33.9024947698695	8.9473138542109	0	23.0029594221321	10.052328725939	0	22.4835392902077	7.77237569808783	0	9.11579442577794	0	0	12.5700863586605	0	0	25.3407048653789	0	0
ENSMUSG00000002968	Med25	16.4097055038743	4.85746301875591	0	4.88691383136512	4.84869319258372	1.54332044677337	1.75339721664134	17.5781471357624	18.6006250188972	9.05014270562561	9.96308486714854	8.00163628735282	0	1.93374624621851	5.70447010604816	4.01033537000181	5.74040825884568	4.6848148946831	0.368001524231191	0	0.052809415515745	4.33057657496544	13.3555639596681	6.80729449313639	2.99626105103245	0.476220984675575	1.08538701301741	3.88330341267284	2.97687398202459	3.91688862730447	5.34913599676071	23.3143456975795	18.3276072262522	0.194690054563311	0.147667332724502	12.2301618638098	4.78906165245609	10.0400457328185	15.530177605495	0.472303385293678	14.6739747687007	9.83226768694166	0.55395854293255	46.4287385444647	10.3015320270295	14.6008280338339	2.6076226993759	2.24444231798629
ENSMUSG00000002980	Bcam	0	1.21357400101513	0	0	0.840960081075818	0	18.6674789076899	0	0	0	1.49277750968924	0	0.561746953905712	1.00617011764365	0	3.07410392577696	0	0	0	0	0	0	0	0	0.517790332085809	0	0	2.76047014028937	0	0	0	0	0	8.97643479454861	0	0	0.139280382385454	0	0	0	17.6029219251769	0	0	0	0	0	5.96993167571027	0
ENSMUSG00000002981	Clptm1	7.7407498230349	8.0702049268501	0.123792271305103	19.1603790828885	15.7038461516676	17.4148621621735	17.3862826355017	12.4844915621303	19.861073711428	0	16.9176643441078	9.89512903979336	0	2.93712020975924	2.13611471839052	21.8622609317614	6.46848289488098	31.8843975340929	0	29.8154434569451	39.8341676353214	7.37276996654164	37.5601934852181	7.81339816881367	9.70907734513158	0.409527040976324	0	7.93578883346282	68.766482356037	0	0.0597402408421716	47.8402738219315	25.8969599288224	43.2113478816327	0	14.3683608158028	48.358462761871	28.6705017536991	13.8035996775785	43.6458778024066	29.0173254691869	59.4285058460057	11.3423234676125	56.4543103647134	36.4597689131936	27.0011391465752	23.833822638829	25.7348262173745
ENSMUSG00000002983	Relb	0	0	0	0	0	0	0	0	0	0	0	0	0	0	0	0	0	0	0	0	0	0	0	0	0	0	16.2898450981274	0	0	0	20.1488378321508	0	0	0	0	0	0	0	0.2810756838658	0	0	0	0	0	0	0	0	0
ENSMUSG00000002984	Tomm40	94.0240730680263	47.1563081851657	3.40682474985459	26.8924602674125	25.0364978003955	28.6979633442885	95.4841091126636	63.6086194615771	20.2765999171087	50.9390612914966	41.6202555515559	45.1476008984379	70.5591516025843	72.9262090845277	23.3085049636128	18.2798191304458	27.3046882791435	20.7489444756543	68.4296918057995	47.6219108844002	0	29.858916379162	51.2669538712789	30.7423695469509	47.7874468555271	59.894058934521	27.7839972575999	13.0659385689273	31.1820152427762	19.8639109269039	41.8418634778666	61.3190696689264	98.733528057973	87.8733755400741	51.0897559607143	99.2575514377619	68.2208151532212	49.4721382611325	41.6176364885452	60.5900811368377	70.2742655546256	99.0608921548239	28.0931734369538	59.8175570171564	57.7364413172183	45.1627481273022	91.0704225192355	94.5201100538511
ENSMUSG00000002985	Apoe	122.770466611014	154.839926398251	0	40.441125654557	99.8770390022555	11.2179874383098	153.734250094225	0	0	7.75766043593282	255.186579846541	42.3554979429686	47.4052421481303	22.9587266822807	28.1924864352004	77.0441904494333	11.3012030855092	97.1244298181628	25.1371646532278	10.6669846638227	15.8288936395921	0	23.0217554859098	108.154282635944	142.398686555918	0	0	84.7393278389165	23.1415352823199	0	0	184.745849480364	0.23955378435407	263.29516910845	95.5480854782109	53.1739129201826	110.868487282305	92.2323167045789	14.556315438181	0.187257173183945	187.319525893926	284.534191856702	46.7815139392426	129.443800480016	18.598219758975	0.277127453252489	59.3642992512521	7.86831129978316
ENSMUSG00000002992	Apoc2	0	0	0	0	0	0	0	0	0	0	0	0	0	0	0	0	0	0	0	0	0	0	0	0	0	0	0	0	0	0	0	0	0	0	0	0	0	0	0	0	0	0	0	0	0	0	0	0
ENSMUSG00000002996	Hbp1	12.2808944239404	4.29215239756409	0.0623277124051149	0	3.65342745778383	7.9903252124092	10.3805591223529	0	0	12.3840088331397	0.516231041943234	13.3073495189108	3.3801736118558	0	0	34.9045910371767	10.725376826462	0.0579543584101465	11.3160404766058	35.9778580450323	12.5431396053457	13.329772903746	6.50702546975014	0	0	11.9001809340388	18.1264207152882	14.9198402796769	0	0	20.7540909668089	1.33597938069605	1.66098910636939	21.6760399487133	15.4055555149923	11.6776586250508	10.5483151799345	26.5581342147637	0.177068109586287	7.14109647955249	12.6740238636669	14.4741917494044	0	32.8307890568867	0	0	12.1290354202214	5.11465751954042
ENSMUSG00000002997	Prkar2b	0	34.5004902131166	0	23.8927618684212	0	0	77.8352085219966	0	88.48644109553	16.0539841681379	14.3837206430599	67.63631151456	3.64129543839769	64.1926157434954	36.7693845981792	0	37.7944321397388	8.5142918848405	39.8653010911669	11.9603815549018	48.2091688208443	38.6080737341699	35.7115785141935	0	0	58.6944971613658	0	0	21.5432389890076	1.57352890606337	0	0.132707055614209	29.3107043012983	31.99420779465	28.2769598733742	0	0	0	0.299008497212111	62.596709339708	25.7196041604745	0	0	0	18.1893728688415	0	87.2658072968483	0
ENSMUSG00000003031	Cdkn1b	10.7121511179331	2.48105015449586	0	0	7.31362309525463	0	0	0.46031855674268	11.5567263056675	0	0	0	0	36.1212382924662	0	0	0.199049639143387	0	8.81083237622319	0	0.177013633993681	0	22.1768624971984	0.0832758997218477	0.145554593351714	14.6057875714513	0	0	13.8092306339998	1.59906303066674	3.99348811200887	7.13341238925902	1.01263047419618	1.63147015187115	0	0.398006658159455	0	6.35479510011114	0	11.5216640050556	3.41433265330951	0	0	0	2.77473595008423	3.90486705879057	0	0
ENSMUSG00000003032	Klf4	0	0	0	0	5.7351601987045	0	0	0	0	22.391637426898	0	0	0	0	0.38164000855055	0	0	0	0	0	0	0	0	12.308336391555	0	0.476627076692681	0	0	0	0	0	0	0	0	0	0	0	0	0	0	7.31369363939055	0	0	0	0	15.1573901653651	0	0
ENSMUSG00000003033	Ap1m1	41.5992543689692	0	0	22.671109345752	11.3008302854776	29.3089780072222	43.6626234233133	57.6928735853199	32.6275845184394	21.56338586932	0.124984172254394	19.4261995722421	21.4469482445622	9.51940476645338	35.303306939203	7.97884768151632	24.7576740867213	2.3572534844921	13.7300662011492	20.1526605116045	0	0	18.5110594513741	35.9546835588012	0	8.3296344887741	100.124395291749	0.178933862432844	26.6203196016517	19.8529532708473	6.29186317965258	43.532915763657	60.1602011981555	32.3430076070779	0	2.56054283471679	15.6728924761682	0	4.28697798295631	154.911554736584	63.3860873439977	15.3130466769443	39.8192499123658	30.8698430046619	0	124.119502575659	11.2463556634327	45.2865655750262
ENSMUSG00000003037	Rab8a	40.3638196163452	1.35800105185692	6.98415459687884	21.3655838922573	12.5799080105887	17.5249824824283	37.8881664378532	76.1464112761342	9.16645977399959	72.9714648510175	32.3259618841463	47.7897092344704	53.3192724603589	42.1435902390872	9.25324462629912	20.3795924305117	6.39171453475054	45.8406834094109	12.6030688746376	28.5073099393564	46.7647468611592	22.2994304801752	14.2746632397077	10.0480793172718	29.0349987883893	30.2886929866414	12.0112328928637	22.2263550197685	57.7369781481115	17.6891827565595	36.7973321018099	28.3867143621733	52.7712714060323	44.239090649718	63.1750079825115	50.0567818087821	40.8602731198606	46.5949683661691	24.7434325294517	17.3732866101447	26.7234029221425	50.8300285340442	22.5852379437389	51.7045527232426	9.69999849844023	17.6052353169049	22.7938108495441	17.5950924507901
ENSMUSG00000003038	Hmgn2	63.2887374443649	57.6682000779471	72.1017161369102	26.9597804507467	45.3866636697842	38.6196047877707	66.9770109700007	101.801203850821	61.8318815987656	86.7235451609118	89.2135387771835	62.3576939953541	76.3443482747609	91.8637701592173	68.7524724841729	30.1734909131577	41.0595605959009	45.0843620685406	85.4565511526872	65.5606561240736	78.4700282542133	55.8539072348316	96.1009978949353	76.6815370377299	109.128272060212	73.6116252645679	72.4826463787624	37.1438630353731	64.9403599926711	64.8518797089476	134.694915374119	113.242486757748	136.242848572709	111.963069169318	107.378520826343	107.756270603077	102.507448381945	92.8018872553946	69.765327032857	105.453203931838	103.863889351271	131.145581857084	97.1369925676298	104.059478372897	104.872794223208	113.659025031567	118.581182085407	73.4313274398017
ENSMUSG00000003039	Fam32a	74.8286839812591	24.334437033572	13.7743820321094	80.9611844668209	46.6778621912356	42.7271188512008	84.9504845183012	28.1980700470324	30.1798110838276	18.0217571377627	42.2409650456656	39.4273720544105	69.9410504766193	25.5513352737517	75.1114451974825	45.0427188035426	30.2778172799779	56.0141821424185	81.14167114334	43.4849462493183	56.0143565398903	47.5559168780957	56.5292879748801	68.8674502886402	57.1798130302856	55.7859346097733	33.5369922006521	26.7482788666678	57.3963835496068	19.7242270695117	81.3663706223859	53.5320216328431	38.1017112794903	49.4086177935994	53.7427704948325	19.0048404949671	139.558974740241	55.4442621444087	52.7538067084074	120.497209055721	7.35667190053462	86.5962313982582	78.918801076284	23.7311960446435	112.57330985875	52.544094254036	9.38502867610808	52.871645893686
ENSMUSG00000003051	Elf3	0	0	0	0	0	0	0	0	0	0	0	3.28228498702639	0	0	0	0	0	0	0	0	0	0	0	0	0	0	0	0	0	0	0	0	0	0	0	0	0	0	0	0	0	0	0	0	0	0	0	0
ENSMUSG00000003053	Cyp2c29	0	0	0	0	0	0	0	0	0	0	0	0	0	0	0	0	0	0	0	0	0	0	0	0	0	0	0	0	0	0	0	0	0	0	0	0	0	0	0	0	0	0	0	0	0	0	0	0
ENSMUSG00000003062	Stard3nl	9.75728277410764	48.2756979481089	16.3359376020996	35.1291864499702	14.1717541662795	3.11481261598783	10.0666246757608	20.7042518850348	30.3922478769633	17.9772182771527	30.6989694867593	13.5718576731414	33.8868232474082	0.910059909531232	18.8672734027166	37.9996604127908	1.61798920960839	16.4023149601877	5.51469998427809	13.0458126420302	25.3960196307635	43.1556143326661	29.0553302613582	25.9935014080355	19.9952503589916	3.3735834712264	1.47864598612675	9.81758979208318	2.38982418077986	18.5393925011865	0.463733619537357	23.1937808542193	8.23123914025183	15.8254158512599	7.1750765895839	33.7272263576673	16.3901671981642	8.43947476434076	7.60485397159404	35.5315804687206	7.52164052401846	0	24.149426994471	0.242650378851654	19.7144255196355	20.9490539322602	14.1386327183364	15.0200442490504
ENSMUSG00000003068	Stk11	1.88770602561366	2.00352925685654	27.1915940564103	0	4.47882394271436	0.380850450863141	0	0	3.37825700895186	0	0	10.2391047390047	0	1.81551827504737	3.09960015503529	1.49109328884045	2.50588139595826	11.4712807123057	0	0	0	15.4494506821715	0	7.20071067935481	13.0198265948319	7.93251068141914	28.4106652356232	0	0	4.34962785119444	5.50810238053105	11.2167016840453	8.05151776164371	0	0	10.482695886563	0	8.53986905833006	12.1595918390284	0	10.721363229715	16.2140319829347	2.15306026697431	0	5.71982444208209	0	2.77988521551633	16.1350693679755
ENSMUSG00000003070	Efna2	0	3.47795263914489	0	0	10.7306269566275	0.409266791401499	5.60462365328014	1.63880030525002	24.8936120147475	4.5250832156604	4.295091929861	26.3694350189534	26.1416629150049	3.27261040845038	6.3341137862127	3.07650819914297	1.27556164811924	5.70237163900643	6.58724455269769	8.70673141550587	5.48268789212527	0	0	31.3076741501444	0	15.8553430297685	0.277549692374801	1.73778283290011	0.761231199599972	7.91012710331646	0	9.09706554862676	8.17158314981985	0	0	1.70035317498061	1.25450382895655	0.38237721225512	3.58697945693591	0.375744567120858	6.87050881372437	1.40798442390761	0	0	14.927449589747	15.0140397620396	0	0
ENSMUSG00000003072	Atp5d	52.3764010459478	21.6004498798186	37.2811853989825	41.9660004103847	43.6046307598798	31.8912868462655	74.5846339117663	42.3855978949246	1.60502252085057	16.805145143902	72.6546995690937	59.9692307354751	72.1421194653187	109.211164072376	1.93132014285581	32.0207643446674	40.4161619993465	63.0277695161966	140.831832868965	143.550051509047	68.9581951348414	36.2956741011887	93.3364649462639	46.5975307269308	20.103746770132	8.47972225850874	31.9043947214071	20.5373011151655	60.1587829739881	32.1900921687702	182.414718390628	58.8211634347112	76.7717693901773	54.6968984775459	61.3527897003626	139.074426128315	106.767515447092	135.455441649725	35.6818874505051	58.350617215303	92.2951873828346	90.6504992364987	73.0662123795371	132.266271515127	85.6500904758058	130.915123907121	66.4494216875463	11.841528661077
ENSMUSG00000003099	Ppp5c	20.6217436568505	22.845875334451	24.7588490067836	31.3653450446162	30.2393664867648	0	30.0109724746502	42.762654495769	20.8629530880824	7.74880098153132	51.0126725102399	83.406078215449	1.60448973709319	32.758735465269	18.2557790161591	48.5187301712922	45.0725565533765	13.3342888433988	0	66.3137490685211	12.7185650720639	0.995439358742106	85.2745551642533	84.9768949490743	32.8535654144463	47.7306452659778	16.9742523917612	10.8095224394698	48.7534478438315	33.7168709167599	90.1441372672107	44.3537786857739	53.5683817064008	53.0460866522678	73.4032368059902	33.3632634833039	89.0831729650571	47.5499963631268	37.2582131392199	68.5558303812265	77.5723048695563	55.0139832342025	98.8257801113024	128.9802311396	53.8506931945249	4.15655831989289	7.23171271487058	10.8243941335631
ENSMUSG00000003119	Cdk12	3.83270304399104	4.75386553686034	0.819213560107297	3.31361850021719	2.46547199216851	3.68041797592424	5.78336002294928	0.297722374295635	5.1254383771427	9.6676146147528	7.59937863585592	2.24018981744548	0.0306398722172953	4.27610148185537	0.0595202243514387	3.91238472349665	3.63047536205394	9.7196968911001	11.8303414372485	5.14071995745437	10.2008746971847	3.127020416959	4.16939529200238	8.17606049190658	1.66629607959433	3.06629070176391	0	0.169994796500564	1.17549542488952	3.20068031466016	0.442780608594919	7.18912472940646	7.42269552100004	0.506492898981585	5.66638455242613	3.74546998871181	4.06433929478808	12.4692948130572	1.62912472777716	0	3.57169138495727	0	3.60285568971221	2.04656528681929	1.51546438603697	1.46483003892249	10.5488408548517	0.896336826456543
ENSMUSG00000003123	Lipe	0	0	0	0	0	0	0	0	0	0	0.33804757429323	0	0	0	0	0	0	0	0	0	0	0	0	0	0	0	0	0	0	0	0	0	0	0	0	11.5425988018721	0	0.346094902869376	0	0	0	0	0	0	0	0	0	0.153109523435783
ENSMUSG00000003131	Pafah1b2	36.3985164754909	67.2043129889735	6.09159512638604	32.3399197784472	25.9959139894148	26.1665361788284	31.9031505387722	27.6306965475323	100.596649154817	23.8449002755599	59.9379697012096	9.29239525422162	34.5231220276369	28.2311299249695	71.0334922346042	75.2815588911768	77.2417269901925	41.7678168827306	46.1428386604357	17.0217160943051	25.1009872912356	32.2895190395359	57.1942574594907	35.4032788957335	32.4228579560872	59.7750091125375	0	55.0357786428696	150.963561664995	78.9747799876086	6.91168423989867	6.33217832653445	5.45252930117496	17.4895073985379	63.0557732446592	31.4520596648504	22.2078239317009	55.2036861863984	8.19050326309643	0.290604284733081	15.8321437917495	14.428561407216	11.9296104799689	44.6590986804964	38.5966066552961	87.0899675163797	29.8427370326494	29.8729164595195
ENSMUSG00000003134	Tbc1d8	0	0	0	0	0	0	0	0	0	0	0	0	0	0	0	0.0521413037823191	0	0	0	0	0	0	3.35109017111619	2.74951937970726	0.126467743641344	0	0	0	0	0	0	0	0	0	0	0	0	0	0	0	0	0	0	0	0	0	0	0
ENSMUSG00000003135	Cnot11	35.3911516697206	0	70.4541409762563	0	13.2287599526758	0.248616742439166	20.5639840795455	29.0691780941402	26.5896726528009	25.2893846806343	0.340321782603755	0.115241761944722	0.102453164512222	0	0.132681914033139	6.93043838537221	0	28.1196265151206	37.9575079253722	1.9833998695599	12.7480092467582	0	19.6611801058046	0	37.8689236151279	62.86446877134	0.337205470040308	16.7279697983398	0	19.5482408613621	57.2132014070035	0	67.3057359827509	37.2592809324937	52.3455858782504	0	0	5.22634874133476	22.4123404478168	0	35.3152348702993	43.4067991655833	0	7.35974923312885	20.9363137487964	32.9353496395369	78.8256541254812	13.7012946399547
ENSMUSG00000003153	Slc2a3	123.199642096114	182.724378353811	0	103.247071286651	222.839897657605	0.0601896157678809	243.97944027063	0.289216020744331	12.7525788193193	13.8954344171228	207.680808068414	107.916426106919	102.687343173964	0.851518044005831	23.3848348118541	236.104877185438	0	117.161594858387	0.166074157252869	0	0	0	11.0776607514007	12.9758219589227	482.90847335291	0	0	162.857327901914	0	0.793171506548437	5.06938615146428	80.8747020051948	3.18115522328573	195.988633196398	179.751072194154	0.187549307240356	278.712021920474	164.093868814568	1.43185656346128	5.02862403041021	0.0310899915741288	409.476900036503	0	133.352208203692	14.0759674552707	24.3705385129109	8.29241294576769	0.124389600406214
ENSMUSG00000003154	Foxj2	0	0	0	0	0	0	0	0	1.15768178832769	0	0	0	0	0	0	0	0	0	0	0	4.52169507261076	0	0	0	0	0	0	0	0	0	0	0	0	0	0	0	0	0	0	0	0	0	0	0	0	0	0	0
ENSMUSG00000003161	Sri	30.2207261769141	13.674922564238	20.9140561900698	0	4.08912939670061	11.2343818589833	9.55082392002126	7.91737797925924	0.0911106883818132	45.7106149318143	42.8132097129165	29.995160000979	34.0739123062824	0	13.8617597516245	2.98390754272984	23.7162804178377	8.2500633081867	13.8869759028512	25.8916619868696	21.3398472710618	0	11.5658811232464	14.7659909843153	16.7279786365999	8.38635754151022	54.1235628887286	35.7546145459172	0	5.05328062869441	15.2921226558073	0.19977170944068	5.17232760851219	27.6527689967991	3.48275169421444	18.2964940414571	3.76501971832105	20.4887041212924	9.45241536199145	11.9644674894383	16.7588959218049	0	82.1654556128865	17.3636050159304	30.9488410458877	9.52491397654537	16.5642944017099	53.3069171411062
ENSMUSG00000003166	Dgcr2	16.984007910354	0	35.9591558439071	15.2959748171201	11.8037039159242	0	8.7803631613563	13.468282062743	12.1206039357031	5.52021977459698	16.7261132334708	3.53232146012667	6.06409137152665	0	4.24218339001343	11.8106808342827	13.9682989311979	28.967103982174	4.16899174357214	5.64848326147739	17.7224834352408	16.6556389641895	32.4935884508476	0.0571063415989531	41.822014047093	0	0	0.343311490199563	17.228675789018	26.0287629987896	15.9281809663328	16.7925005172809	0	17.9004570806086	0.0565709591922883	3.61635636942292	2.21503647593932	22.7710007823222	21.3032968696163	24.0647753345349	14.6590387508845	15.5942016953112	37.3507256919608	12.0776868292538	32.6994827356495	0	10.1895272898511	5.06852954472323
ENSMUSG00000003184	Irf3	0	0	8.0403835482187	6.45285050345275	5.95962046996855	20.524099398781	0.416389994368622	0	15.0267518952183	13.7836506322649	13.527049309002	21.6110780261428	22.032133333519	0	11.2237643281652	0.158726490712126	6.31777309039417	9.76061175527168	19.8087580651265	15.0484334605811	15.3334331949506	0	20.7668423709063	0	0	5.48868897119925	0	9.43473237222892	14.1387305608443	27.1577130708153	10.2393245452758	13.2355432038613	0	0	21.4924611686016	0.131589650489674	15.5336877368181	17.0450030304264	24.2697257217098	1.04683397048387	14.658723278856	0	31.1047239033957	33.030154223696	7.61092270329343	0	0	12.5676140143129
ENSMUSG00000003190	Bcl2l12	0.175014040431388	0	0	2.00718546060624	13.9548941388946	0.882740417486431	0.483540607495546	6.36245972760936	6.26413647813746	9.17446881843924	0	16.1625404712878	14.3689526253042	2.85060316857215	5.18211507966676	5.39147941807045	0.458539452115737	3.79832747703585	12.3811814148312	7.62913020001769	0.815552694270483	0	6.18762737540334	1.53470403050142	17.1006022043457	6.98671133094224	13.4694472420453	1.44161289976259	2.87330106387469	15.3163184085874	15.5829515876926	0	0	12.7783083231172	9.88205334522131	13.5237667217318	12.1761786111122	4.32989944980487	0.276310483759775	0	7.18145764379428	0.379607136557074	0	0	10.6533384318349	0	0.402703513634387	0
ENSMUSG00000003198	Zfp959	0.141269503224029	0	0	0.648071645450642	0.274737673545909	0.356269416861354	0	0.285317275366651	0	0	0	0.165142198080917	0	0	0	99.202046678244	0	0	0	1.10530971307446	0	0	0	0.154849630528534	0	150.933513899326	0	0.116365485699791	6.7922315298457	0	0	10.4927478988823	47.7017344511326	7.88757170809865	1.2271830951582	0	0.182008963746351	0.166430931232774	0	97.9628864069025	0	0	0	0.740110088000688	28.0909270240735	0	0	0.736276678875018
ENSMUSG00000003199	Mpnd	18.604182317857	0	0	0.688277391784456	8.75346409770567	3.97290633015368	32.7473418622493	33.3319895491244	0	4.35083315656191	20.3722574082616	2.63081193645608	18.7109258711778	2.79283141548116	0	0	17.5580492102695	0	7.65598262459431	22.3037593815701	41.5992023300517	25.9577187517537	66.9176465136895	0	0	33.2573521575263	20.7844381564021	1.1122622043114	5.27825494473169	27.0913663943826	0	2.73336233073327	7.33252828690546	11.8135897967451	0	60.3253770648747	18.556860109372	4.77241597863835	15.8704110915072	27.6167366449009	51.4989861948177	76.8002054809023	3.05578432684919	11.0043613605031	16.6419063175422	32.131154829383	22.0943588495701	0
ENSMUSG00000003200	Sh3gl1	83.2857356188798	21.6322547435249	1.48407336834882	41.7293082284956	11.0361805234426	17.2577455750677	2.30568590832818	19.5513938347773	34.1366069520122	0.186157380937689	36.8756390231343	31.8029442311967	0	0	63.7969478077332	21.753266377929	14.7222441594997	87.1087291502238	125.043741307253	53.7279285128659	66.4990331040587	8.41191097747834	63.2459930700815	96.0486221791852	54.6807582182564	98.7176452339117	0	54.1679089494577	27.2060246624406	73.2183048815185	55.6838438903931	70.4046796805165	51.167162223187	40.3819308298796	48.5708645114546	19.4550725635646	18.4932350963281	42.8659249446945	30.0399637131573	66.2751215442447	111.210265299478	82.178349573817	0	41.534749533166	10.8370639594881	242.489731566429	28.2273395300211	28.1263376864456
ENSMUSG00000003206	Ebi3	0	0	0	0	0	0	0	0	0	0	0	0	0	0	0	0	0	0	0	0	0	0	0	0	0	0	0	2.19125160763913	0	0	0	0	0	0	0	0	0	0	0	0	0	0	0	0	0	0	0	0
ENSMUSG00000003208	Ccdc94	0	12.6526934175597	21.1098399488701	0	0	0	27.6949634901797	0	36.0803885759387	32.0696202669834	25.4979151597797	5.85895798408817	0	34.3724903804642	14.7338660631368	0	21.6554670719007	0	54.148916009554	0	0	23.2162882020585	0	31.806184979957	0	0	0	12.1680485916193	0	19.5788124511167	0	0	0	0.377648214152937	10.5981441673388	41.1127823503201	25.8294459855691	35.4280799702461	27.9033543599726	0	0	0	0	0	0	0	0	0
ENSMUSG00000003226	Ranbp2	32.4950693868903	0.0601857749790307	2.06477022095393	0.0676363995593098	52.7873019922898	41.0120535607812	0	13.2211276604415	44.3652185925659	12.0372460904552	17.4069020367453	26.9213324355839	0	10.4290630833047	16.2716356851622	0	1.67390880029972	0	0	13.8098011646978	7.96971889366913	11.5120592688361	13.4993825982253	15.6115045653862	0.819166556922452	0	0	36.5065357790425	40.6306665982768	0.032665572788446	4.2703982699552	17.1080758169065	0.0436703607562246	11.6513232619579	0	3.39853161448844	4.71087866329573	14.8336960005025	2.74670714858881	0	21.894744833578	0	0	11.3159601415358	3.98874426658059	0	0	0
ENSMUSG00000003227	Edar	0	0	0	0	0	0	0	9.21801515663539	0	0	0	0	0	0	0	0	0	0	0	0	0	0	0	0	0	0	0	0	0	0	0	0	7.74515521094175	0	0	0	0	0	0	0	0	0	0	0	0	0	0	3.05604419694728
ENSMUSG00000003228	Grk5	0	0	0	0	0	0	0	0	0	11.3338965804641	0	0	0	0	0	0	0	0	0	0	0	0	0	0	0	0	0	0	0	0	0	0	0	0	4.86453052507261	0	0	0	0	0	0	38.3939335537309	0	0	0	0	0	0
ENSMUSG00000003233	Dvl3	0	1.44082214524203	0	0	2.26519781789474	0.267038436153274	2.34041944987434	1.1405702226537	0.992602502615663	0	0.0812307827021822	0	12.6184487835735	0	0	6.57968121674571	1.66455717828665	0.145909176695396	0.0818675423077525	19.4099773041479	1.23356714932523	6.00040577462616	0	0	0.135244847711166	3.85631096935452	0	0.523324021420246	11.2582660411954	0.078200007687874	9.76879149545933	3.36353739161157	4.18180029352115	0.808486317623188	0	9.43029615278973	0.181897506940627	3.65923830678598	0	0	0.183912626213156	0.61245454324293	0	0	0	6.40996534759187	0.974577027485056	0
ENSMUSG00000003234	Abcf3	18.1809918773919	0	0	0	7.75228305270053	0	0.268618566323081	0	0.12428143380055	17.0249481722109	0	16.3662093140006	0	8.2195310770144	11.8422991216634	6.29738538720177	9.08536345607109	0	40.3662451886739	0	0	0	21.1530921801812	0.106570676281656	0	0	7.15004525200454	5.04536144688347	0	13.5706582922476	2.81603772336433	27.250276474731	29.3735907094733	19.3473310140218	0	6.11209325142031	0	3.09261142276115	6.75387649705085	24.7619578236717	0	67.0601566443901	13.4653819339427	0	6.04970387092783	25.8187424046507	29.977353712164	32.430120841357
ENSMUSG00000003235	Eif2b5	99.7932349156695	19.6866188287284	0	57.595777098585	34.6862947993405	21.8784282843147	131.902765503945	35.6955117407292	17.0821325782303	29.6891146917465	39.4353300771708	41.8251821438117	100.239358832173	36.1928337837879	72.8849166719214	18.727648461647	21.5530213192251	56.9129678931617	64.3660271827126	32.6435162770467	58.7563909298166	12.2409985504649	47.9687344220527	36.7377249956459	37.6809046061087	7.01936968867491	99.3443672823084	28.4951478924216	30.204261532959	30.0846566192114	123.354009858862	47.8756107733499	97.3578231470525	72.5133998487426	65.0632667740218	56.1753716547874	81.7805012698281	40.5010630635238	25.3513362014609	79.5970780737055	33.6220965126943	35.9974976886457	73.3112084671668	32.4642866896157	42.7128011163226	74.223868810108	59.5132796216801	86.8719293432143
ENSMUSG00000003269	Cyth2	9.43622871578744	3.89298014807761	15.0625908053168	17.2693692459707	2.04988596830887	0	23.1588580767301	24.7348958467061	30.7972639787674	35.940640914435	0.115515124661245	19.9493692752843	25.038423299312	0	5.67454934281176	0	15.2546558862353	0.103745871789659	0.232841271271802	2.46848683007829	16.255657853346	11.2514024316224	12.8314687866129	53.9173378262952	29.52210511519	3.0583340165634	15.451743251252	13.3955758655675	0	2.78012944602972	35.4295177539136	6.75268970129125	45.9388363434664	12.6468851002601	36.8432781323723	9.59767928009827	40.999090859387	19.1589297487862	11.4111016387433	22.6616511094684	33.6726267958201	45.0715431872898	35.9846323865364	36.0254224779853	9.50536863016545	0	36.495575786579	47.4363081073056
ENSMUSG00000003271	Sult2b1	0	0	0	3.41394298697138	0	0	0	0	0	0	0	0	0	0	0	0	0	0	0	0	0	0	0	0	0	7.17420282488651	0	0	0	0	0	0	0	0	0	0	0	0	0	0	0	2.08889638486192	0	0	0	0	0	0
ENSMUSG00000003273	Car11	20.8286699332923	0	0	0	0	0	13.6425735261204	0	0	0	0	0	0	0	0	0	0	0	0	0	0	0	0	0	0	0	0	3.40178728288733	0	0	0	0	0	0	0	0	0	0	0	0	0	18.6941732544992	0	32.2189980365159	0	1.23052646947834	0	19.9643371119257
ENSMUSG00000003279	Dlgap1	0	0.270014241890388	0	0.373465016022404	0.0791617025471263	0	0.477963043991007	0	0	0	4.42634623602638	0.428250106887801	0	0.0473566708795616	0	0	1.06647123043867	0	0	0	0	0	0	0	0	0	0	0.117351633883687	0	0	0.0218330329349038	0	0	0	0	0	0	0	0.0321321513600115	0	0	0	0	0	0.0275305983747982	0	0	0
ENSMUSG00000003282	Plag1	0	0	0	0	0	0	0	0	0	0	0	0	0	0	0	0	2.9892860618192	0	0	0	0	0	0	0	0	0	16.5165122522465	0	0	3.20492877036238	0	0	0	0	1.15040281667004	0	11.1297612783347	0	0	0	0	0	0	0	0	0	13.7827377179696	0
ENSMUSG00000003283	Hck	0	0	0	0	0	0	0	0	0	0	0	0	0	0	0	0	0	0	0	0	0	0	0	0	0	0	0	0	0	0	0	0	0	0	0	0	0	0	0	0	0	0	0	0	0	0	0	0
ENSMUSG00000003299	Mrpl4	4.75727886134017	7.82189694293776	77.4037547825889	16.9741776330794	16.0622331113963	37.9919062676086	56.7736168834319	74.1960106408566	2.02706485301593	55.7131980391645	40.9050223917461	45.5709169912552	70.3155211951638	30.4408752796964	23.832652920667	22.1290323230037	28.967591810286	13.520461713115	17.4711028785967	0	59.8859377329697	0	9.10450534207863	16.6577256348463	0	37.6219855084593	4.52012529194269	27.5392683894731	0	68.6567680030178	64.2174488805266	42.0384715064584	75.151601270316	61.2958983708284	26.5459820469644	32.7107634888238	54.4816743753693	43.2799280339613	30.8775117900568	25.548117942925	90.5463631563625	74.8097310582344	19.3786001866217	39.6350586981737	80.4394220149244	40.9790705405968	67.0466727239631	26.286512289129
ENSMUSG00000003308	Keap1	0	0	0.163807799873149	2.19733987266367	2.72290617344286	3.99556188967542	0	2.38127147699999	8.19518606914224	0	0	9.7341349673845	0.229750075288008	2.22904307918424	8.03351811393315	0	3.34653354526573	0	0	8.07184625750859	17.3412257097513	0	1.6700748651561	4.20024260979336	0.211772163521309	0	0.126029915715044	1.57818675342431	11.4067891859085	0	9.09087854196396	6.60928077873382	0	10.9716744322327	0	2.70234054029254	0	8.07379747031285	12.9138794515095	19.1092493764904	0	0	0	11.9679254971652	0.0996803595961158	0	0	0
ENSMUSG00000003309	Ap1m2	0	0	0	0	7.81794923779429	11.1101596493834	0.152145898154649	0	0	0	0	15.7072319458771	0	18.1950965485896	0	6.26373150226784	10.3881090655112	23.7890275216284	3.06549622750838	0	0	15.4925024953782	0	1.32795886970457	0	16.5456004639766	0	0.725764863676655	0	13.0547441496592	0	0	0	7.5683588599414	0.119591728381659	0	0	5.838863498281	0	0	0	0	0	55.248039550003	13.5572590478331	0	0	0
ENSMUSG00000003316	Glg1	22.9251113722763	0	1.46376940266055	2.79703700293225	1.56519098869765	15.2533559981802	20.7536447141502	7.68400872039629	35.602458854204	1.90410906425969	21.5532648958912	18.1892135666805	17.691479504513	16.0028944673564	11.9480344296109	15.5270551590655	0	11.2413554039955	29.6983458571201	5.5064601236799	37.5607452004115	1.28419633304576	50.7181808715242	17.5367534182092	4.3921765754639	15.4752206969135	5.67266161109276	15.5891017051224	33.8622264569021	27.4493277197109	64.360208973873	14.7649608031407	2.45608514700509	37.010057636091	30.1367781989246	1.02213049813362	7.7297076191652	16.3773670102231	14.9396285030194	0.112935355787666	8.80019970950833	33.0087947775846	49.6726577812932	45.4863935381907	19.0682904191736	0	19.4726744429279	17.3291906850821
ENSMUSG00000003341	Atp8b3	7.48449604859476	0	0	0	0	0	0	0.889187383956156	0	0	0	0	0	0	0	6.3756655965866	0	0	0	0	0	0	0	0	0	0	0.878465682400786	0	0	0	0	0	21.0821562155965	0	0	0	0	0	0	0	0	0	0	0	0	0	0	0
ENSMUSG00000003344	Btbd2	0	4.03516585709941	19.7225321924237	3.98168279212731	15.8480580588434	6.56664344028668	0	0	27.9837358132969	25.1695576778798	9.65466134630373	14.3173588439946	0.400898718470579	5.01151375313527	12.2008160948844	0	14.9075190980092	3.18933209874288	47.4214428501528	0	0.22469773060213	26.3333405821838	14.5999937997061	0	1.29334957126576	27.1519266893505	0	8.26149518552177	0	10.5764311011229	16.8630407104494	45.0047890812407	16.4247320019898	2.8993399285679	20.8388419956954	62.5212299519806	22.1163730894283	12.8384801788441	0	3.23767965748772	13.2535177549952	0.209175600066029	13.3564873226531	0	30.6561581099761	0	7.87753655170802	37.6129384708511
ENSMUSG00000003345	Csnk1g2	17.166216863326	1.24090993507955	15.2637022670631	7.21872730866386	0.417305785836847	10.6425448637268	9.18917170198981	16.4682652887532	10.0574139820354	15.4765894727531	15.3912256532873	11.2877339445256	0.148668335515563	1.66429069614376	11.3594378950431	2.76840666706575	10.0570773621711	5.76578142887263	34.092946410278	24.6236028572236	12.0823246102574	0.860861173116924	3.17721121627053	3.05766368682941	15.7590317534137	6.38702462932052	0	0.471334368551127	14.6784976789462	8.95356931869847	2.68553078532492	7.61801627711166	33.6853743788589	10.5470468049045	13.1256559633943	16.2999161107487	0	3.79194030705323	15.4706439875028	24.7583030080486	6.00969215618173	4.34393043462871	26.5135901335367	4.40300446147917	0	17.5237403914574	14.7298700709966	6.83435312262891
ENSMUSG00000003346	Abhd17a	38.8972381624315	12.7757243249606	19.3802522219669	20.5103993285478	7.39074532791632	25.933281508677	32.4256642673484	3.61192858486133	32.004999821072	27.67595886013	20.8364046290221	12.0209002207472	0	2.94756246002018	0.902614391263576	7.2397543058425	1.75709235432585	4.38958373496581	40.9624538997914	0	3.90642887171576	0.168158685036374	31.4114417074989	17.1525744585453	30.836874365523	0	0	2.39380427725283	3.93224875488253	1.2382089129376	2.87772640436886	0	65.5519497142227	3.52040394072366	3.39835318659194	32.7914263880876	0	22.9126011701559	6.35281918963651	48.3946615268134	13.5410277781347	36.3657256869802	20.9440731852501	9.95488733750376	0	2.29799028463021	7.45847516008562	68.7407325683753
ENSMUSG00000003348	Mob3a	3.08205426333136	0	0	4.14415328781099	0.10334324290725	0	5.13854769735586	0	0	0	0	0	0	0	0	0	0	0	0	0	0	0	9.6344945816565	0	0	0	0	0	0	0	0	0	0	0	0	0	0	0	0	21.6541570937432	0	5.30190078126795	0	0	0	0	20.1747777482107	14.9554220549856
ENSMUSG00000003352	Cacnb3	32.1442454258983	9.72818175161061	0	0	0	0	7.04357484918512	0	0	0.123627594007337	12.3721511642388	0	0.691164809824758	13.0675269060895	0	4.81546665972959	0	27.3781032908251	0	0	0	0	0	20.4115636056689	0	0	0	0	14.6880413908071	0.613945252664896	16.4090357682449	0	29.7121937056953	3.96712186502003	5.17540870708065	0	0	0	0	0	0	0	0	0	1.79923049070989	39.3099963064555	2.04036446908089	0
ENSMUSG00000003354	Ccdc65	0	0	0	0	0	0	0	0	0	0	0	0	0	0	0	0	0	0	0	0	0	0	0	0	0	0	0	0	0	0	0	0	0	0	0	0	0	0	0	0	0	0	0	0	0	0	0	0
ENSMUSG00000003355	Fkbp11	26.4929598604318	45.8663358759486	43.1173053310427	73.7897389796823	46.0025871983848	0	0	0	29.0277905353909	0	0	16.0379957950211	219.773390418149	69.3503785908169	6.04891582362295	41.4797267403943	15.287157511667	27.3798270665676	0.548658125534445	0	0.55113957724982	0	26.59015065472	14.0012875231381	86.1061947318948	32.3051768790489	28.3188013758885	39.3585959073896	16.0886890916822	13.6260571535366	0.507506013173578	55.6912148244317	0	63.6649795115225	36.4730231537717	22.9254012974856	22.5521804381525	32.8836556221778	75.4376759327508	84.3430899933793	172.555832851649	206.252864663738	90.5741162925326	43.9935205797618	0	0	39.7326788199268	11.0955183235119
ENSMUSG00000003360	Ddx23	11.7982319082888	23.1747468163571	15.0168517079419	22.551752123055	25.6588458486427	19.9960457739498	16.1232234258676	41.8920281845015	13.3788325210404	19.1019598664308	12.9194937617506	9.86200612985641	8.1083824718253	14.6118434715637	20.7453964647955	21.5949253874194	22.4911975236343	16.1264699129827	10.7402947736224	11.9819697100791	9.53263224414541	4.34205341220939	10.0630281355911	12.4456840243139	15.2516225002923	12.3279829427117	20.1781477197048	27.5353352236531	8.25671263685697	16.5130102440903	18.644609208105	21.0677075574894	5.4485743717979	10.3523544016898	12.8111432582583	9.71991828820594	9.15306119664701	10.9851740993582	24.2350445432968	7.04955250947512	10.0807529906298	11.2818238354028	8.78509969534742	16.449666181873	9.00935297072267	4.8903947684193	20.5795381795228	20.8826000381148
ENSMUSG00000003363	Pld3	0	0	34.1783517868021	0	6.44036220777387	10.8869305524609	31.6967152256793	0	0	35.4850092676054	0	6.49815346867235	0	31.281057009879	0	0	0	16.6234664332732	0	0	0	0	0	0	0	0	0	6.81955869682493	1.1095647649436	11.1366813274097	0	0	0	0	25.813653710944	12.5470101695698	0	1.1147001905823	20.1665074275671	0	0	0	0	11.7729139579644	15.6786569436689	0	0	0
ENSMUSG00000003378	Grik5	0	0	0	0	0	0	1.94127332126888	0	0	0	2.6180895030131	0	0	7.78526075450378	0	0.475718772182687	0	0	0	0	0	0	0	0	0	0	0	0	0	0	0	0	3.66682307761476	0	8.64679667706865	3.0674545654975	0	0	0	1.85923762972418	0	0	0	0	4.16385384459951	0	0	0
ENSMUSG00000003379	Cd79a	0	0	0	0	0	0	0	0	0	0	0	0	0	0	0	0	0	0	0	0	0	0	0	0	0	0	0	0	0	0	0	0	0	0	0	0	0	0	0	0	0	0	0	0	0	0	0	0
ENSMUSG00000003380	Rabac1	0	11.8183838531378	46.6903318742177	9.37512442059654	0	21.1880884449337	11.9199268337576	66.9564522352225	58.3426664909653	43.5610716008519	0	0	43.4213059776972	0	27.1995310204296	0.538085930102895	0	7.04014172650112	0	2.53803412213326	17.4591464504234	0	39.1111137232761	13.9382968810871	0	0	0	0	54.8538803984887	17.3565507542612	25.8204930641943	7.95545251318271	24.8852812411203	33.8083178663611	0	0	16.9680634987274	15.7832910438687	42.3025363606692	2.10298535137111	0	0	36.073503882089	0	0	0	15.413258842269	34.1230158251571
ENSMUSG00000003382	Etv3	0	2.71378444361358	0	0	0	0	0	0	8.17530868263831	0	7.51432969289957	2.63636001172276	0	9.97305491874846	0	0	0	15.06289281298	0	0.188116895464715	0	0	3.75328925477064	0	0	0	0	0	0	6.45090694137442	0	0.188688404556391	0	0	6.61560861479776	0	0	0	0	0	4.40672034065284	0	0	0	0	0	0	0
ENSMUSG00000003402	Prkcsh	1.45611681638915	0	0	19.85418649389	3.14646935597841	0.510027796769938	0	2.77748859220082	22.9565687313076	19.3986877333618	33.32537038502	5.57937262063695	0	30.3050790187759	18.3457342739556	4.92022418004652	0	10.2832180076704	6.84866515857183	27.7587315129532	64.6497682444815	1.58214704784398	28.0872448566457	0	4.26211087620293	35.0136382582705	0	8.39595352821731	58.1519648965522	3.04689180831308	33.410515746785	3.62776078299389	19.048980715998	27.910720680663	53.1434868787457	22.1433215415114	21.574384620578	9.3397534798754	7.15214336629747	0.936504880157367	6.58616926767729	20.3536910907758	50.7467491228845	0	12.0369572010065	20.6508247398876	21.4989982478945	18.8321490467625
ENSMUSG00000003410	Elavl3	0	0.512234230010212	0	0.230258256612942	0	0	0	0	0	0	0	0.117349231031084	0	0	0	0.0792941336765079	0	0	0	0	0	0	0	0	9.52015767558246	0	0	0	0	0	0	0	0	0	0	0	0	0.591324992246488	0	0	0	0	0	8.67765650929573	0	0	0	0
ENSMUSG00000003411	Rab3b	0	0	0	0	0	0	0	0	0	0	0	13.5367865795817	0	0	9.11348543006506	11.239898446299	0	0	0	0	0	0	0	0	0	0	0	0	0	0	0	0	31.1020210167669	0	9.270734494694	0	0	5.89630218574044	0	0	0	0	23.9849587061999	0	0	0	0	0
ENSMUSG00000003418	St8sia6	0	0	0	0	0	0	0	0	0	0	0	0	0	0	0	0	0	0	0	0	0	0	0	0	0	0	0	0	0	0	0	1.26473425653207	0	0	0	0	0	0	0	0	0	0	0	0	0	0	0	0
ENSMUSG00000003420	Fcgrt	0	0	0	0	0	0	0	0	0	0	0	0	0	0	0	0	0	0	0	0	0	0	0	0	0	0	0	0	0	0	0	0	0	0	0	0	0	0	0	0	0	0	0	0	0	0	0	0
ENSMUSG00000003421	Nosip	36.1884032001714	11.7222974129873	45.1640627822754	15.2981940991806	44.4368562840969	0	35.4891175009874	21.4525983387108	0	15.8419931177974	39.5107107283291	36.6728920104033	62.1258426202483	20.3087053495391	7.06483805828594	21.0729824112011	10.7865947307226	16.5937816717852	40.2501479371985	9.80161584745129	67.4829076874111	0	35.4934092210041	9.88294584784682	66.0198207119369	43.337572284216	41.8245578932996	11.4962450415067	0	39.5415825302059	171.978925188426	0	49.204518416172	55.8752112737221	30.5778964939277	8.41158642972996	27.2108601056902	17.751998642234	31.7843896761494	119.105861289514	32.1781412792233	33.2188782242002	31.1930098678584	34.132819958466	0	46.7650597881767	1.98935535735387	51.8191526592237
ENSMUSG00000003423	Pih1d1	28.9331132266433	14.3268363995629	7.99195549549428	12.17348045296	3.82891830973487	10.1462707986138	11.3521929553806	13.139284269162	70.0307421827418	34.3709192052082	21.8675277697213	11.2074325002558	8.71825710610636	29.3457567492406	0	5.00357759855251	0	16.2778300024824	18.0679639448895	72.9072917728423	21.5402808637222	16.7417787859728	4.65603644089756	25.1463534661069	0	10.7913561151187	0	12.6919028759296	19.4742348484791	7.96548375338692	45.1795922400752	0	32.9611776353319	10.0489946331359	34.9492025238916	34.3062036033541	28.8950943395494	44.3727932300607	35.6785228217969	78.8819915021659	35.1251492676671	32.6777850305131	82.9887487062473	26.235070663961	30.8006883013604	0	33.0902673302426	80.3051870741306
ENSMUSG00000003429	Rps11	596.902683966921	439.019673638487	1086.47038251298	802.410095118656	426.471638063528	271.726890176234	739.527564110171	530.5040987215	361.832247977132	521.276822047493	685.025388483177	595.419145143647	504.829973233853	919.728084779431	378.277517413942	515.388034822439	488.127704207405	383.021962714857	535.99522285448	713.651476405816	591.5161263947	546.748232480705	731.031811661139	453.133341019655	641.8833046118	680.416835281589	443.764737570526	475.210276389624	506.346352963972	441.563620982551	855.628736163725	810.171511712218	837.820667274958	1097.22610680043	807.03816463945	846.170437466477	1181.11487153144	860.533727416018	443.103630252416	809.505615758917	1123.89133448312	839.422408529482	796.372722563335	1291.29274442767	951.283320949434	821.278260774027	812.300938979638	697.346794268049
ENSMUSG00000003435	Supt5	0.599978736801566	6.61283371331019	6.53517526638267	20.5053286625098	12.1933193434803	0.529582991614864	18.0685132208225	2.05998676815727	1.61059164826504	8.29789097320588	2.07121584554818	0.140273456246386	23.6319848577834	0.139605231017611	10.7398689345866	21.942560462996	17.2914877362728	23.5624081817908	10.4372594491416	49.6255242249589	0.349482157329648	2.79819085991998	23.3878860314806	4.01169077508066	8.79357823276901	26.0947122714303	8.20899922901736	8.05562483793775	0.0703584180407503	2.06040197216338	10.2980401285187	6.72652556701028	19.3706082628179	40.5422785794802	7.3618211423283	13.0441779631482	18.0882301736207	19.3674323362674	4.73620329553535	16.3226269123542	20.0471383299256	47.7598991280531	13.1975529202956	18.1524710896657	24.2665125516632	3.4949598944882	28.093949703089	9.58948002021258
ENSMUSG00000003436	Dll3	0	0	91.5756584670847	5.84492406128536	7.90550425689576	48.5036434728211	0	44.6031991571074	140.996763356477	70.917993294988	0	0	6.1792559138017	97.4091825603512	44.25840345616	3.92978944250469	54.0465167560416	0	168.730469694403	31.194665706739	217.415474256587	83.7929417261987	128.262640350583	0	36.4991676853015	193.127410053203	47.9392593396884	0	89.7892900074823	62.3716676054678	173.778072163473	0	101.534661363574	0	0	103.618030945445	23.1377458249677	0	39.4645053604628	61.9497978224098	125.031837377586	0	43.9915000513316	0	68.7747963712054	414.125263911303	237.885019574105	88.64461202422
ENSMUSG00000003437	Paf1	21.1238587019804	0	10.2857766785968	4.38381448126821	29.7349590970735	29.2998952882625	50.4418085033835	0	4.11466257152817	59.6864530649037	34.4935957325425	14.4633439240711	79.1361593192024	1.48235471011486	0	58.7971305938108	26.8817753498636	21.727035025571	36.0472218550305	12.70486138409	7.96859979811927	6.65865350381379	27.8125271595597	1.10259422784715	11.3703624279474	28.215096020594	0.688142401920536	15.3285634565797	13.6833411588361	34.2095009198687	34.8542080536513	0.140967471525041	44.6916222468589	28.945450424565	108.133463306348	35.7022854459161	15.8109566831385	42.0695568582111	19.6924665423953	50.0735920869482	53.658314122684	46.9087538961336	50.39910956525	11.7255137502099	28.7102340664178	48.7716911286305	23.7241331156221	40.630137148391
ENSMUSG00000003438	Timm50	32.8562126276333	44.4449075831737	86.6419062792168	6.79750855541224	46.8585369765842	23.3959099621143	62.2981900417138	126.731895706972	91.9055646408104	81.3399555921897	8.89604182842006	34.7935660612449	112.749478514781	119.923182054472	76.3896840632058	43.5603682342265	46.8115705750584	14.9140488715804	60.9672833921003	60.055239517874	181.177279575384	84.3230598374088	104.891503506341	93.4968684215384	53.6914235073762	84.0591960874764	50.022747965838	14.328042367387	82.3481845249077	73.9369418440311	87.6325230362696	38.4611153476	85.4882130943194	125.618825172062	55.824028621552	79.9886615093546	49.1375377057809	63.2993135235898	130.394664567016	146.926415321634	139.730341508699	108.714731749071	104.446571669455	38.4769006107541	277.124398233781	213.467229775353	110.733863781173	72.6379189093419
ENSMUSG00000003444	Med29	15.1181527384666	7.16328180827708	15.0029274942367	4.95387787061099	4.46271780729374	6.12750022817279	42.8882777702138	12.5405963093239	21.7411013128799	33.4228792791734	26.4057114589611	22.0911530547587	0	80.1962485707131	2.54343253785929	9.38282965080801	14.6178988700503	0	13.4628968461547	28.9680634604887	40.8858657502345	27.00922529658	10.2789001208886	13.3163429344444	8.79281549721235	5.67227149428566	6.00231001394154	4.44750521456811	9.81414798531884	30.8036606395614	9.84664672241695	4.54001093305003	11.5947023712108	18.9381292966202	34.0047549927678	10.2537203220752	44.5210122842596	39.4382841823348	7.67198383010748	11.5637517110766	44.3108830730289	16.3957093297657	50.5862314091833	0	21.1806368461398	0.462528099183312	66.467142306593	49.0115417338255
ENSMUSG00000003452	Bicd1	0.391650899085416	4.91236238211927	0	0	5.24572007465102	0	3.2985973301742	0	0	0	0.0145380339918164	0	0	0	0	0	0	0	0	0	0	0	0	0	0	5.40192008943344	3.21949734311747	4.44366261425669	0	0	1.4230674036875	1.16854736524327	0	0	0.0274371115419143	0	3.36939664095901	2.23261746789444	0	0.54115975384098	0.106974422109718	0	0	5.49368093085638	0	0	0	2.06317781669636
ENSMUSG00000003458	Ncstn	19.6621560049528	5.94874685785193	0	0	6.42948360853702	0	9.37448386818535	55.7008228329375	61.2780005221976	88.0116504718801	28.6323488993674	17.289453371913	23.4178809024399	30.2979759884188	21.0183506213512	0	12.0809860984093	11.6887015549682	0	0	31.5211629261764	0	23.6608644292153	7.62911991011523	13.6679974170652	26.5969599647341	25.2950759890866	24.4372789350045	0	10.2160490043439	0	0	21.0020267986635	0	29.1912126741103	36.9181964637205	0	7.68722489920434	5.49423412235789	0	38.4194864179104	27.7396840679262	31.5410755085019	24.8408874215597	10.5916964736129	63.9451205982616	53.0494761961032	0.0755725496807565
ENSMUSG00000003464	Pex19	9.06494741526665	11.4713613827398	0	62.3779575909503	8.55021087936007	2.62901615294386	0	11.9003105783333	1.04288900137799	47.7218715698467	32.7539123983772	13.1400378799105	0.188417143438466	0	0.0610023793483946	38.9524377563486	32.4587437768533	2.52946848349019	31.6439832292187	0	4.54101450372047	49.9144344875308	0	0	28.9166423952846	0	25.42573438792	7.09356680323546	0	14.8621420639865	11.6693125755141	67.4566486845979	30.7433845156806	0.129776358782307	0.196863972277017	70.7594285408477	8.29216617846022	20.0774597367423	19.0344968849119	0.629655312609082	71.7956326523589	0	46.5264189801735	0.118728014117017	14.2240607076829	43.9520508781735	18.7724227692633	51.8910047712932
ENSMUSG00000003469	Phyhip	0	0	0	0	0	0	0	0	0	0	0	0	0	0	0	0	0	0	0	0	0	0	0	0	0	0	0	0	0	0	0	0	0	8.84709074063024	0	0	0	0	0	0	0	0	0	0	0	0	0	0
ENSMUSG00000003476	Crhr2	0	0	0	0	0	0	0	0	0	0	0	0	0	0	0	0	0	0	0	0	0	0.0508585504890069	0	0	0	0	0	0	0	0	0	0	0	0	0	0	0	0	0	0	0	0	0	0	0	0	0	0
ENSMUSG00000003477	Inmt	0	0	0	0	0	0	0	0	0	0	0	0	0	0	0	0	0	0	0	0	0	0	0	0	0	0	0	0	0	0	0	0	0	0	0	0	0	0	0	0	0	0	0	0	0	0	0	0
ENSMUSG00000003484	Cyp4f18	0	0	0	0	0	0	0	0	0	0	0	0	0	0	0	0	0	0	0	0	0	0	0	0	0	0	0	0	0	0	0	0	0	0	0	0	0	0	0	0	0	0	0	0	0	0	0	0
ENSMUSG00000003500	Impdh1	0	0	0	0	9.90256663775309	3.97152792566755	21.6098906832527	0	0	4.56678981141858	15.5845473512692	0	0	0	0	5.55624634624868	0	0	0.73054479010142	23.8215382970801	0.122308145406684	0	18.2736002149131	24.9722529844704	9.75542765131893	0	0	0	23.7614944949207	5.46623751370858	87.2844092632548	11.6232687313735	44.935024706819	0.15030261346524	2.2800123079442	0	41.3906286080226	11.7502056367619	4.47532390089603	44.8486046091755	23.2495374148608	17.7620184405795	35.4958942617579	0	7.81086703617226	31.837350827118	0	3.6478553124591
ENSMUSG00000003505	Psg18	0	0	0	0	0	0	0	0	0	0	0	0	0	0	0	0	0	0	0	0	0	0	0	0	0	0	0	0	0	0	0	0	0	0	0	0	0	0	0	0	0	0	0	0	0	0	0	0
ENSMUSG00000003518	Dusp3	0.147726503157805	10.7039668081459	26.8454988862807	0	8.7625004945031	0	14.0811321205409	0	1.60512046571668	0	0	9.41162387832703	16.2738164534561	0	0	0	0	18.0916004294625	0	4.78843883264673	0	0	0	0.161927336836331	26.0384172670671	8.61326309316502	0	6.69263092465604	0.0866180951702018	0	0	9.93721316571907	0	0	5.05289100992307	0	13.1326348074855	19.4922541656031	0	0.855095763065516	0	4.32567277864012	0	6.67521759848207	0.899230958620491	0	0	0
ENSMUSG00000003526	Prodh	0	0.305919720725544	1.44376626155171	27.0448667713745	0	0	0	0.201807769458989	8.94100959318088	0	0	6.89159721271972	0	0	0	3.47281270808583	0	0	0	0	0	0	0	0	33.5972468415035	6.08839103557405	0	3.04533956450281	0	0	14.3635492673807	14.8432515784246	0	6.58031008457295	0	22.6400354864156	20.8553559106249	21.8955975314523	0	53.6738249141911	0	69.5704386852372	72.450606845591	0	0	0	0	22.1329747674536
ENSMUSG00000003527	Dgcr14	0	0	0	0	12.1675945607874	0.15469094226261	0	0	15.2113156519227	0	9.17585111378836	0	0	0.0951501184327197	0.247666630593251	10.8530856820659	0	0	0.569094132338672	36.4740442529402	0	0	6.11665659907436	0	48.7698246202298	25.9046139875872	0	0	0	24.3260833421987	0	0	0	33.5450480567965	2.53098351019858	0	14.5410893150401	16.9097132316304	3.48627573124075	42.0380729106468	0	27.4071235506166	47.9733207410562	0	0	55.0672599163184	0	1.0656292478929
ENSMUSG00000003528	Slc25a1	30.5142126963902	17.6789075863957	14.8380056074434	19.6851762305632	21.1719719676316	7.61525878541143	49.1789241388117	0	69.885917578044	67.7133785118129	1.28016876434096	23.0373366322879	31.5470996837293	0	38.1812939179424	7.28114009646279	9.02187610749775	0	0	39.6135106096507	0	21.8777076711776	27.3741848348113	0	82.8205636171252	13.5239099843422	0	45.2952653086435	17.5189874214923	19.0142456192981	32.2226669457943	53.2308979492825	0	64.6174143778851	0	0	29.6902122111235	36.6980203368266	41.9026880316432	10.3032751980549	49.6868357988008	0	40.1380641682001	65.3609721465608	3.22472376551864	0	12.4334709834617	1.24246689560159
ENSMUSG00000003531	Dgcr6	14.366043632382	0.354702898971896	21.5043971193271	4.25187105678572	3.15437505787785	12.7096876592066	25.6074034281058	29.2486051129632	19.4006857164962	51.0414227318735	28.3964039361983	1.2188987966897	19.8666467949629	15.9049877867823	18.6335190801259	8.78531185577711	1.82125418568984	0	27.0066623259302	22.532131270806	41.7054795878098	32.7682407512488	44.8466518339674	16.2550092557229	2.44161125571424	2.92107730017284	19.0217775099723	12.5969439152722	31.1122331803674	26.3101764559107	54.0634169510889	3.57193154983852	20.0748478864433	24.3816518884126	9.30932462538101	54.1697061922308	26.4200187455407	27.2980180675263	8.96264196970066	45.3334246761604	18.0348510419232	11.3080960075896	26.4281836455406	31.713903228138	16.1418400473068	0	19.4603606146509	27.6751234069605
ENSMUSG00000003534	Ddr1	8.40302016998765	0.0739273951564802	0	5.98169857250462	3.87418101866581	0.0913434784747166	12.9091364697366	3.80391159248776	0	0	1.00029226089147	9.73833925507743	0	0	0	8.6402203326039	0	2.62026780289863	0	0	0	0	0	0	9.99259418589529	0	0.123891578225953	5.07191668714127	0	0	0	15.938300845242	0	4.04456965677115	1.10122588597774	0	0	2.1335511083883	0.114367305385278	0	0	0	0	15.3702292762338	0	0	9.91760735337707	22.5898445136534
ENSMUSG00000003541	Ier3	0	0	0	0	0	0	0	0	0	0	0	0	0	0	0	0	0	0	0	0	0	0	0	0	0	0	0	8.05977602809796	0	0	0	0	0	0	0	0	0	0	0	0.707967880225065	0	0	0	0	0	0	0	0
ENSMUSG00000003545	Fosb	0	0	0	0	0	0	0	0	0	0	0	0	0	0	0	0	0	0	0	0	0	0	0	0	0	0	0	0	0	0	0	0	0	0	0	0	0	0	0	0	0	0	0	0	0	0	0	0
ENSMUSG00000003546	Klc4	13.2552408296407	0	0	0	0	0	0	0	0	6.14624007416323	0	0	0	0	0	0	0	0	0	0	46.6733571622857	0	0	12.0806719506912	0	0	0	9.20099189254158	0	6.76450273220443	0	0	0	31.9829979815568	0	13.2641460960427	27.055844099225	6.14117234626359	0	0	35.3100361668652	0	0	0	0	0	1.1994390612814	5.69235096432572
ENSMUSG00000003549	Ercc1	0	8.05464040432966	4.32437321892704	9.4342232977077	0.756654576323159	6.02737767542487	6.91038746681195	13.0216933544386	47.1767688619354	0	18.2921226092873	10.6557326499424	32.9253053089133	10.7774101519542	0	2.45860242186948	0	0.114884129963155	11.473850526887	9.69152123126644	6.34563436757033	11.1214457103565	21.6663090783436	16.3277512058939	0	19.152257868941	36.1224991789242	6.68433871954207	15.773402928966	16.7476213185965	3.33900131071578	0.155784688879168	0.164630662471553	30.3964932407938	30.5387530893467	26.7886242897218	32.3677580118101	5.36944381419834	22.9908796477404	21.4912969002362	12.7429990536815	65.5828373190626	12.2260840618103	0	41.6523882805935	0	0	17.4775185411643
ENSMUSG00000003555	Cyp17a1	0	0	0	0	0	0	0	0	0	0	0	0	0	0	0	0	0	0	0	0	0	0	0	0	0	0	0	0	0	0	0	0	0	0	0	0	0	0	0	0	0	0	0	0	0	0	0	0
ENSMUSG00000003559	As3mt	35.1555330741583	50.1881306309435	9.00021421958658	0.453020956043167	31.3040906479106	35.8621486797914	0.272837304514905	0	0	0	47.4994102408453	14.0835831839104	0	31.7094426381497	0.132909238843018	11.8565334547021	6.55450416532772	0	0	33.7755667107579	0	60.7640592074641	0	68.1939732114009	33.1093058435109	25.105875325122	23.9826076561963	25.8670306852661	27.56137331173	0.218790312771499	15.6784867370711	24.6336429881068	1.16999655271046	0	0	44.2326097455817	0	13.495447938409	31.4933986903717	28.3518696157293	5.53147945462377	0	34.5944104575279	0	41.6772065694992	0	16.8146540770059	15.0972460755732
ENSMUSG00000003573	Homer3	5.026566044948	0	0	3.45889401467261	0	0.760593778322611	15.1376322972123	6.49727153579126	0	0	2.54502654013831	0	6.79109609653396	0	0	0	5.97025475793483	8.00004322101273	4.31382451201457	9.10172975025366	22.0180261111303	0.756225249276949	22.7838992505162	0.550976592345713	0	4.54136236511246	2.06322695738617	1.90460532175611	1.6504775878536	0	6.79423675136128	0	33.9458854466199	1.29531141825305	17.0293058809511	0	0	1.65811653349117	10.3166623645656	0	7.66101677548951	0	22.9325954017263	0	0.40796505312608	14.8124623763456	10.8720583483293	0
ENSMUSG00000003575	Crtc1	0	0.662807822752438	0	0.0709389817592189	0	0	0	11.0558785679904	5.89056429478225	0	0	5.85686213075814	0	0	0	0.513015033162848	0	0	0	0	0.0360296039142925	0	0	0	0	1.9494311708585	0	0	0	0	11.1143453797184	0	0	0	0	0	4.74167369405088	0	0	0	0	0	0	0.850643431495694	0	0	0	0
ENSMUSG00000003581	Rnf215	0	0	0	0	0	0	0	0	0	0	0	0	0	0	0	0	0	0	0	0	0	0	0	0	0	0	0	0	0	0	0	0	0	0	0	0	0	0	0	0	0	0	0	0.40586682245199	3.98216784234178	0	0	0
ENSMUSG00000003585	Sec14l2	0	0	0	0	0	0	0	0	0	0	0	0	0	0.612218393978515	0	0	0	0	0	0	0	0	0	0	0	0	0	0	0	5.46507614355057	7.51499845641138	0	0	0	0	0	0	0	0	0	0	0	0	0	0	2.19756931118394	0	0
ENSMUSG00000003604	Aven	0	11.2914820068638	43.3488305048834	4.12402160464331	0	0	0	0	11.4031011285111	0	10.6629168161109	13.6615295045895	0	1.28723783496982	0	0	2.17414266917984	0	0	0	0	0	3.76132517920939	0	0	0	0	7.29102714479407	14.4345478989133	6.74124409404814	25.3704295751691	11.532272322589	1.74101616599341	0	14.1166544887545	0	18.7987854481054	6.92480467324846	0	0	3.55819078732464	0	5.91542652833972	0	0	0	0	4.50511225226465
ENSMUSG00000003617	Cp	0	0	0	0	0	0	0	0	0	0	0	0	0	0	0	0	0.0315727213527318	0	0	0	0	0	0	2.06060407356891	0	0	0	0	0	0	0	0	0	0	0	0	0	0	0	0	0	0	0	0	0	0	0	0
ENSMUSG00000003623	Crot	5.83140623865522	0	48.9627248294774	42.5988325423853	35.3166819678831	65.0593925436169	0	8.83312163063264	78.2695586487512	5.51429825469678	28.0811212823179	37.5667021915976	90.6419070245255	109.336415122567	48.1145086322458	60.581677332082	4.26244469197909	0.917093731014522	8.60063847188132	4.60507125954147	4.06132087670986	0	34.1317510062571	63.2944459001719	68.4301870942083	4.26168902297943	26.3424468202933	27.3063043994473	1.18928422752752	60.6671531782883	51.2010873184208	2.66484329418855	71.7182582633867	61.3426397943625	8.87863370569554	69.81588274281	25.805775305597	29.720366939849	0	67.5820610707771	23.4907508642131	25.1592700579418	23.4958226348332	56.5354035183693	0.771664103420297	71.7818008120558	73.871590065963	54.3981074709009
ENSMUSG00000003644	Rps6ka1	17.055853973088	1.40906517992241	0	0	2.68517684882258	0	0	14.2709563265589	11.9393945287187	0	19.2526112067511	5.50670499115098	24.309263015349	2.8347271662242	0.273278625192726	1.09062022986489	1.70234656154194	0	0	0	0	0	5.96383812791341	11.3953035764051	0	11.3480731716291	45.9776253084035	12.7780125452512	4.09546139695539	9.44708618003851	0	30.9590787815971	54.0071700178728	10.1158812497984	17.7264263623298	42.3360187036667	13.2893045544588	3.82736420533424	0	26.1387793523491	10.7386422634515	13.3884174118354	0	1.06375616218042	42.7370060663218	27.2732985041215	0	15.7325968414196
ENSMUSG00000003657	Calb2	0	0	0	0	0	0	0	0	0	0	0	0	0	0	0	0	0	0	0	12.1972706965286	0	0	0	0	0	0	16.6273444223089	15.6895123713921	0	0	0	0	0	0.284048656772519	0	0	0	0	0	0	0	0	0	0	0	0	0	0
ENSMUSG00000003660	Snrnp200	9.95155932674192	0	0.0983181998727059	5.2754142588109	20.3857532276725	12.492713088295	6.29326338165708	13.0419077572891	37.4845615550497	0	2.137598591538	10.7542863521721	0.229828431454709	19.0390896589486	27.5018605123228	21.5907409564678	5.98718776459087	15.6784439457953	3.23153250482642	16.0668044456185	12.4178041263177	18.3652769068553	16.8400959903547	41.3056982983554	13.9817296296976	23.975884183635	19.1378659414282	19.964799146721	16.1824181525909	16.4627468288442	48.111102720131	54.5451626871364	34.3234402426496	6.01537240461408	19.2105398193329	1.04268683792534	29.8026351605459	27.5123803017437	11.6613696325433	33.8963503784289	19.3875461780817	19.4744918113398	11.3504468863897	13.8450469819267	12.5640087981532	7.80500639347023	9.61729537127207	32.3875106841014
ENSMUSG00000003662	Ciao1	0	13.9096347964049	0	3.47368023661001	7.25781825367322	3.81922597894035	19.276890055215	0	16.1783171796501	0.723900081269113	33.1106020600017	1.89678495887747	58.2333916716913	16.5282928435351	84.514436548514	13.1585601311848	14.170690606517	0	0	29.138806953086	27.0941043661145	0	71.3896460069473	12.2128261620227	9.94779369064	0.113640597187675	18.6854231590619	4.54425966801609	19.5352117373726	8.14855331907315	30.0549283603817	38.5048878461636	46.458597865252	8.82718739412152	6.81265110192924	13.6006979639049	32.6119983486862	12.7439136583619	34.6687118328405	0.751371603879777	35.0165009416384	3.05015580978359	31.7258659295521	20.9684739852206	26.4847628691922	8.15449914994313	26.5081445803175	23.3029150689052
ENSMUSG00000003665	Has1	0	0	0	0	0	0	0	0	0	0	0	0	0	0	0	0	0	0	0	0	0	0	0	0	0	0	0	0	0	0	0	0	0	0	0	0	0	0	0	0	0	0	0	0	0	0	0	0
ENSMUSG00000003680	Taf6l	36.2637182157758	8.57731168936373	0	0	5.20077855714438	0	15.7513928143926	0	1.20209125772551	0.393322324917973	2.09660736543129	12.7106727849907	38.2983301487533	8.2510709175718	17.9170644082255	11.1421464520287	0.975266552811763	0	11.4513268321948	0.328469235894711	10.2021705667018	0.309481713164326	4.58218134212964	7.60205364938722	7.262986204357	0	13.7712100679378	8.52070645526569	9.3046735918133	2.08349061951268	2.64810496540707	0	33.8600561657311	13.5470064937924	10.0835908029757	8.77535686205683	0	3.39288291353393	10.3927304183962	9.72992600037733	0	22.9467481867132	15.0831312380491	0	2.30560807273157	10.6738342072918	0.270476595153483	5.92224722260313
ENSMUSG00000003721	Insig2	114.313345807228	0	0	9.82128040407664	54.803876887368	0	0.1375577656797	0	14.5107609684007	0.111061932998241	0	10.1270730718345	0.206971322262525	3.08929667563302	0	27.0572680499153	0	47.0296197639291	0	0	0.696025967698736	20.3738796787635	0	11.460566953946	0.0953879223923123	23.6417597354544	53.1341834346728	0	0	0	18.4799115876678	0	50.4350040036162	9.55124854205341	19.1381200115055	18.779771691882	13.7272386777611	33.5510956009615	0	14.9859656535404	15.9547248150943	19.0063707922939	0	0	0	30.1964392814646	0	0
ENSMUSG00000003731	Kpna6	0	0	0	0.353651223375651	0	0	8.37763385113103	13.5975369895646	1.37961810976367	0.0573217555807538	10.6451075646364	9.97302790158209	0	3.54767548873584	8.57713941879968	0	1.12210080420654	0.0531140627604954	2.32451991393394	9.53575138489356	8.62166093916259	0	9.87715383885655	3.38004365166162	0	0.593906803581358	2.72480461108214	10.3293953030634	10.6675030644789	18.5032095765256	16.8154262397258	10.5154317724849	17.5821584052934	8.60845989363598	0	41.5978175920663	6.88631685214905	0	0	19.8720239728443	0.736429448209302	13.5997401729955	6.48985195645738	24.2325835322205	38.5835874289548	0	9.46045050309464	5.66962585712408
ENSMUSG00000003746	Man1a	0	2.89016496047329	0	0	0	0	0	0	0	0	0	0	0	0	0	0	0	0	0	0	0	13.7526855740798	0	0	0	0	0	0	0	0	0	0	0	0	0	0	0	0	0	0	4.43629396717809	0	0	0	0	0	0	0
ENSMUSG00000003752	Itpkc	0	0	0.0727294233495447	0	0	0	0	0	0	0	0	0	0	0	0	0	0	0	0	0	0	0	0	0	0	0	0	0	0	0	0	0	0	1.49887397163141	0	0	0	0	0	0	0	0	0	0	0	0	0	3.97881966862261
ENSMUSG00000003762	Coq8b	0	5.49675196016866	0	0	0	0	0.598669323565914	0	0	0	0	0	0	0	0	0	0	1.91946578042628	0.430793866558195	0	0	0	0	0	0	0	0	0	2.39581371506753	0	0	0	0	0	0	0	0	0	7.33068630383077	0	0	0	0	0	0	0	7.26510012352649	0.483997129400119
ENSMUSG00000003778	Brd8	21.0755551624462	25.7237160697548	44.3189836307038	19.0234291336457	34.0611669967598	54.3400489293467	23.1388255342691	0.394125847887272	8.98024235551288	6.8923575404448	5.12734842572601	4.06815449981407	17.880712488159	37.7885657316873	34.778384152473	24.3290107324597	42.8623342953532	5.20997854687134	19.425428498949	13.2325312927232	24.5526383963428	19.1564735580969	30.6046928361904	23.101531863626	3.45832128712533	23.1317770802681	33.8198724561296	19.6909706677249	14.0737745759015	32.1022982561497	12.9791333748065	0.273476629607688	13.294255008175	9.96432964106677	18.8588946187558	27.9008918391306	22.837306411345	23.4499037741552	27.7795850754199	54.030906145353	41.9226738588433	6.13740450106271	17.4880643146268	3.36526309928123	32.3803956270332	8.07977821713574	3.2179923019361	10.7639177257372
ENSMUSG00000003779	Kif20a	83.5416336009883	21.8488949821137	4.86037937705809	40.7486144194308	71.2245114820429	21.9415409250566	69.3450221900119	1.47198459451541	20.7292657231515	15.2417581652882	25.789147180365	61.2366064327445	28.0253128367299	26.073814500795	24.70700819739	27.1297274827107	8.99072332139259	14.782010259619	17.9614713541005	10.5902081315314	72.4892281749867	0.68530423011399	72.0172886235915	39.245325327925	53.0610144143436	31.3923468020418	37.8620626584616	33.2439884309636	0	16.0466786586934	26.4851024013959	12.2565943208369	38.0481584424707	145.946609324627	91.6042394920041	0	37.4428303206244	69.6568690352823	44.3005192044439	54.8432652420924	27.3548108293081	22.1316160710535	38.2238691232297	66.3431875300764	71.5995147330442	112.537253670655	0	42.891801807088
ENSMUSG00000003808	Farsa	54.3356503735781	24.6537273863421	35.4051897320801	31.1142938602076	26.0101142043825	15.7593868803615	25.1607339641116	13.2365084505047	9.83891032677045	0	38.4094153267078	24.6765676399024	15.8398281669843	48.1723159646093	2.05133607064015	42.5583916691291	16.6386432602596	50.4839803107436	18.5598300684867	33.8160887902062	86.9154886115594	20.8663509945929	36.6839856562035	1.08592654075365	18.9804729312054	29.7019909644199	0.3910037865474	11.3618665332192	12.4219663068702	0	55.9178132681449	56.2821793881288	55.1893278038921	57.6049173694085	29.8726328315879	19.6623007197302	54.6883592751971	37.3485973066675	23.4614269727449	64.138098934841	38.1202484612395	27.2734929050393	57.1185213179055	28.8457009793975	10.3085043540011	65.9347157342839	31.1247753133814	1.91970596395972
ENSMUSG00000003809	Gcdh	40.4344711450109	0	0	0	7.93686612465959	0	26.7144773099718	36.5206112469313	36.116753270307	70.4488747027433	7.08043958549076	0	40.7169857465392	3.31145906002268	43.0125473137218	12.9938438843644	0	0	25.6311400866956	0	0	0	0	36.2004025146706	0	15.3027751446055	0	49.2355299494225	0	23.23093932088	27.4805107873989	38.0114640865169	25.6640910497322	0.359547428289397	0	23.5182336633699	4.0446436388078	11.9830270487597	0.198253273750659	0.290744979133823	39.9130466992836	34.0461012090041	24.5527943298906	8.88132105600826	2.71779188139184	40.8768024910045	0	11.7804268620003
ENSMUSG00000003810	Mast2	0	0	0	0	0	0	0	0	0	11.9575131605998	0	0	0	0	0	0	2.21234539408411	0.0467501018071123	19.8829542212155	0	13.701711975422	0.238193642937723	0	0	0	5.08490017597941	0	1.67675891493642	0	0	0	0	0	5.43991261417632	11.5430655817955	0	14.803363974594	0	5.07066783905316	8.90261506415129	0	8.43805341503767	5.34372539773012	0	0	19.3753595504847	1.92560230796843	0
ENSMUSG00000003812	Dnase2a	0	1.57177680969547	0	0.147196083509294	0	0	0	0	0	0	0	0	12.8049535373731	0	4.9662773946232	0	0	0	0.0744236574068806	0	0	0	0	0	9.40548987450002	0	0	0	4.89153551737753	0	1.72103774183469	0	0	3.30738265265578	0	0	0	1.285245803337	0	0	0	0	0	15.2131146164432	15.0175148398832	0	0	3.12162730728083
ENSMUSG00000003813	Rad23a	18.6534949169758	4.10860750264303	0.149155996275648	7.07974891840375	4.04526437137213	11.6760146955539	57.6548526907029	43.6366034558429	14.2381575406947	26.9418924309355	36.135121242984	24.1588232591854	32.0773423574083	41.5300913313438	15.5330001089754	13.7803173329546	0	0	2.64577979278873	0.749985636012604	16.2591522005589	42.2969664453948	3.77132326903383	35.0093562813568	15.9406284649182	35.1043610062243	0	24.3188963828014	14.9502765039791	26.4618265828464	20.5863896294426	13.7288204107589	0	20.556988178786	51.1473913537299	28.472997854732	9.85518151544851	33.8333351985936	7.20358693865608	20.9732393853636	14.0724738927764	24.7414880310928	0	84.0158497102714	32.4936697856571	16.0942548132587	41.3773562879967	4.66279992209557
ENSMUSG00000003814	Calr	66.0434927572335	101.467198037148	149.879558228414	123.117410844486	168.139456210096	134.910321429973	107.822839629736	94.5826767840447	55.4121287049685	117.322586712963	104.8763020082	70.6065467894959	106.948154809134	102.075725525199	62.3021748375314	57.6688613310647	131.926046109365	118.514348799022	149.147567756612	115.560130501935	149.122677435282	188.241269550572	200.404646263179	130.43758627571	145.626157693445	102.306802169617	95.9066216001657	194.952916467144	288.669840018442	109.343649499618	155.479577439331	114.935184767851	281.15778878138	85.0947640046796	146.425952935408	149.876316967758	291.005031685853	135.949106177491	126.828814633101	69.0891842447345	150.242870063096	184.400493368208	137.447693570962	86.9721867161809	95.50915188185	161.908442919222	165.227014402446	164.803263288191
ENSMUSG00000003824	Syce2	23.0200378302375	50.0341962749457	36.9140627307129	170.901234892984	66.1280178387269	42.7653642703208	17.9637301296821	22.0042249929109	0.224628587412885	74.8700770537119	40.442032973373	51.9714580936114	42.5515896129917	125.527518971927	57.1167323650521	34.5624513914516	97.7589957404309	12.5309514500817	48.5032740671909	26.51587935372	8.39339647853372	19.1669285741536	27.5592563454617	29.0852927975668	21.2101443409711	24.7375023140272	0	9.40857524621477	20.8130782928229	34.2611399535922	34.120237860269	79.0505181098029	0	82.7677083741008	13.3568403954719	11.0471116337917	80.1460934506492	69.3529868319985	51.6026676621609	43.7380613808252	0	20.96326402491	26.4850169019647	75.9515413478755	48.0160494776847	73.7612455732655	83.698487595986	56.7830941122635
ENSMUSG00000003847	Nfat5	0	0.768156240019668	0.104574763957543	0	0	1.02030536229442	0.0519902187621721	2.58434296042192	13.7830869189446	0	0	0	0.136894107506917	0.0291901386289952	0.69647536439095	0	0	0.194474114873965	8.40198060505967	0	0	0	0	4.80595013926364	0	0	0	0	3.55277469667475	0.437759200724823	4.70344687570809	0	0.278684291516489	0	0	0	0	0	0.118835458898534	4.37868772933519	0	3.38767043489241	21.5393055547051	0	0	0	4.67625157458305	1.84706170436684
ENSMUSG00000003848	Nob1	54.8602244327337	0	23.2653831058217	32.9947663897246	36.271047352264	9.13177995851855	116.076932821039	14.6263162298112	68.2252307215617	10.2902417318328	23.4020851732324	41.5169191402599	21.1354471392195	26.8535961468104	13.1516475075108	21.0792513335308	11.6096682242315	8.09952889756584	23.9306857921002	18.2959060447928	37.4452386787597	23.7306346726632	26.5302363275087	68.1807454101332	16.2505064584376	31.2658338389842	6.61700441295965	34.7293893637585	1.51236287453514	29.0128758298922	36.0770389037668	18.21246353715	0	59.9342665790014	33.7169083442519	55.0897844640949	27.3520940492623	34.2440950831165	11.9033858890155	22.1654263911601	11.2429650252708	33.5674634212672	15.3560613418658	66.525833452234	45.7601191354959	26.3445974564953	20.8865192424417	23.0083294004386
ENSMUSG00000003849	Nqo1	0	37.2700702216574	0	0	0	0	0	0	0	0	0	0	0	0	0	0	0	0	0	0	0	0	0	2.68499088916443	0	0	0	0	0	22.9417069559879	0	0	0	0	0	0	32.132961779858	0	0	0	0	0	0	0	15.0611695938368	0	0	9.284766567346
ENSMUSG00000003863	Ppfia3	0	0	0	0	0	0	0	0	0	0	0	0.870054148035881	0	0	0	0	0	0	0	0	0	0	0.754098318781484	0	0	0	0	0	0	0	0	0	0	0	0	0	0	0	0	0	0	0	0	0	0	0	0	0
ENSMUSG00000003865	Gys1	0	0	0	0	0	2.73172123348275	0	0.875076245684979	0	17.2360977170221	10.3870746621944	0	0.600385385022133	12.4340481973956	0.728933213241152	1.36897869542152	3.65784711687064	2.0896485263793	0	5.00431008595856	0	0.054320627636515	1.76752437869112	6.49068603753931	0	0.075863225978074	14.3264092203553	0.0594827122558128	0	0	12.7045000800378	0	0	0	0	0	0	0	0	0	4.37418458399967	0	0	0	0	0	0	0.0627272676928392
ENSMUSG00000003868	Ruvbl2	134.303193441337	105.927461708993	65.9609756017806	76.8092191670832	31.403027314222	2.85506600914116	147.00900804397	13.2374631134961	67.3309870891187	44.2605530909246	158.521620521515	65.0562381534366	82.4824937761924	94.2773079045739	24.0583125996684	53.6546952425481	56.20031437923	66.3821642873833	88.8654116882604	111.753700453464	101.067831339036	50.6478082182866	148.542857966839	87.1264487667396	72.9460236407209	132.078216269983	120.655881983051	80.4918750428434	62.1874345644948	72.0791190089389	93.3219964885653	103.375595257344	202.254385123211	112.428944510412	235.378115550788	86.4659178669692	65.7128875642511	138.849506389247	62.0870228291089	118.230514018282	293.861164776698	264.423186415929	165.53147896796	116.592587274551	157.97516506991	188.85634318566	83.906649117889	153.409411282513
ENSMUSG00000003872	Lin7b	0	0	0	0	0	0	0	0	0	0	0	0	0	0	0	0	0	0	0	0	0	0	0	0	0	11.4232491480614	0	0	0	0	0	0	0	0	0	0	0	0	0	0	0	0	0	0	0	0	0	0
ENSMUSG00000003873	Bax	55.5167634548115	59.120150699199	144.384518668901	33.7227534899215	56.1176103848418	52.5723449145155	130.650463076531	36.7842038566609	107.71225828107	26.677203153563	105.29504128108	41.2989620845403	54.5037833534397	125.263923427863	54.0463275763768	34.6660267151738	79.3389632731829	52.8396288689607	78.6360080822303	51.0157741970726	87.9389356938761	53.9760570054984	61.0701023362566	106.794366508268	99.2165127596017	73.0767446568857	42.4078671148028	21.1478026346391	82.0870234684113	58.5834662923589	107.57678382161	79.0317670973948	65.320662551237	105.553634353751	63.1423078593773	97.4262719530906	96.9710498319264	141.667360388636	90.4208525712762	52.3307755527021	96.6160942470082	136.598834027383	76.8715897349383	80.1854805240746	98.2498578873687	61.2799839427494	66.6484535966271	77.3875376283559
ENSMUSG00000003882	Il7r	0	0	0	0	0	0	0	0	0	0	0	0	0	0	0	0	0	0	0	0	0	0	0	0	0	0	0	0	0	0	0	0	0	0	0	0	0	0	0	0	0	0	0	0	0	0	0	0
ENSMUSG00000003923	Tfam	65.6901280084075	52.16802077894	21.219440195713	40.2160728159321	79.8643473841557	88.7279429727765	72.661836669396	77.9035740419767	40.8400889165635	11.9070254129104	62.6784077323424	2.55058738739485	1.37672305517144	48.5929382210268	88.2023203862457	65.18369077422	101.877175469348	46.1452894828096	18.1646883828079	3.22263994628958	41.3958229207179	38.2767891382559	19.7089456013298	31.859805550727	10.3012508149286	15.4721493827175	4.9310411434601	59.2447680037448	20.8347161157751	13.2074315372742	40.9606982556656	2.07487092721017	49.8548238147745	26.8856085871641	85.1219322400001	15.1045230720703	66.3618297631715	21.5737688417283	51.0558019608756	62.8769756372894	11.8764748570004	3.21134978253691	20.3149753896707	52.765613403283	44.7983256474635	28.4367236247103	40.3429432541344	10.1532520836303
ENSMUSG00000003929	Zfp81	0	0	0	13.6209256092184	0	0	0	0	0	0	0	0	0.162406552692668	0	0	0.905211988453462	0	0	0	0	1.27437018381714	0	0	0	0	0	0	105.981456727357	0	42.3552867667668	0	1.67899711453097	0	0	0	22.3088756852305	26.1737607874554	0	10.608924168143	0	0	0	19.9456782677636	0.068225240827899	0	0	28.1068734025897	0
ENSMUSG00000003934	Efnb3	0	0	0	0	0	0	0	16.4575091917427	0	0	0	0	0	0	0	6.09329205988233	0	1.01056888307834	0	16.5158005544838	0	0	0	0	0	0	10.5916206357807	4.92222714251329	0	0	0	0	0	0	0	8.82241840185312	0.699902518459106	0	0	0	0	0	0	0	0	0	0	0
ENSMUSG00000003948	Mmd	0	1.47834145969158	0	0	0	0	0	0	2.09862441231094	0	0	5.53173329913491	0	0	0	9.23020473398043	10.8799721215778	0	0	35.6210714728556	25.651307193821	0	5.86566109942359	17.9955940353964	0	0	0	0	0	10.1632713147096	7.66630278598479	0	0	0	0	0	6.84325240960868	2.5030170992662	0	0	2.07571925034923	0	0	0	12.2795848067438	0	0	1.50997373070598
ENSMUSG00000003949	Hlf	0	0	0	0	0	0	0	0	0	0	0	0	0	0	0	0	0	0	0	0	0	0	0	0	0	0	0	0	0	0	0	0	0	0	0	0	0	0	0	0	0	0	0	0	0	0	0	0
ENSMUSG00000003955	Fam162a	380.138212971513	1156.60795133341	582.31299576544	548.397205795064	611.127346351027	141.466450149747	276.862406670332	416.874150467678	0	375.999212211796	745.763825677179	498.491217332806	116.028612169007	362.00244656629	454.45331613467	502.887766319214	318.196051174639	630.382790099557	293.696262584316	244.708856557418	111.665218032524	365.836766576196	185.141606508131	380.862786378893	388.669731620524	513.781846156974	431.252341150668	644.193464746572	334.655217183508	161.083764812587	401.366924878317	647.212519217985	110.498804346478	695.47457229766	465.405806838092	394.442774918046	312.241393301929	446.561184380866	132.413205433125	215.624718115603	306.477792845264	701.671809277239	459.21941883187	231.823459060373	415.494738831021	0.933068496147752	340.226758753749	276.274199730564
ENSMUSG00000003970	Rpl8	384.743394887278	499.09619452147	707.660242241902	272.388572428479	349.152699090571	225.625173714942	495.473178032257	711.421083417237	499.507267364055	361.554778873245	546.603633037426	527.612080643671	449.048654401691	562.905782605641	346.116319012191	169.541804438318	377.706003888783	399.696015424617	795.624296402914	740.35014770102	605.726691573812	485.275532584736	697.206347700899	560.252430290169	727.514278084538	511.24571219317	360.226980378907	324.518770569851	490.701155701997	328.436494237679	749.290238157345	556.049952743569	838.954036218088	886.234774835491	740.145160178861	744.026813238296	501.898796864021	590.810498343721	492.150642530787	598.211504770591	625.047328978324	656.123191629851	686.381625712923	1218.54403709169	493.849111487192	716.222078707753	702.043967177549	543.30044047029
ENSMUSG00000003974	Grm3	0	0	0	0	0	0	0	0	0	0	0	0	0	0	0	0	0	0	0	0	0	0	0	0	0	0	0	0	0	0	0	0.953714989379647	0	0	0	0	0	5.61225405891402	0	0	0	4.92032602057579	0	0	0	0	0	0
ENSMUSG00000003992	Ssbp2	0	0	4.10399135839709	5.57987977211013	0	14.0227212858942	0	26.7591119808763	0.610822718290935	10.6107602604363	0	0	0.0902915968116755	4.91914518827134	22.5094258830394	0	0	19.529075470065	0	10.1964508639855	0	19.410129699316	7.63977540702146	10.427929295555	0	11.5459332081241	10.9212892832877	3.72135683146352	0	0.769957216757483	0	0.0608775489389638	7.65579109696411	0	0	6.25831848617015	4.5333743754976	0.92119238209282	0.411498190611216	42.1427196070815	0.961989401388664	14.1333444637001	0	12.0619072048187	7.87403470623446	0	0	0
ENSMUSG00000004018	Fancl	0	0.313994114303413	5.0155694263651	18.3489608939691	0	0	0	0	23.4668925697247	0.343165563436737	0	0	27.7121833595218	20.2046140868643	0	15.3110340769403	0	10.5991852999814	25.3344353855545	21.6656437708687	6.69082139214076	0	0	0	0	12.1749453679171	0	3.88602746550475	14.5525078624001	18.2916357840232	11.0019838561651	23.7148925183897	0.151887897671709	10.1309845207771	16.8159021633689	15.4469547311174	0	7.37034344576739	0	0	0	20.9103641674547	7.51983936660574	0.402978090619592	14.1505316173269	38.1293515500236	44.9551833423384	17.3719372987237
ENSMUSG00000004031	Brinp2	0	0	0	0	0	0	0	0	0	0	0	0	0	0	0	0	0	0	0	0	0	0	0	0	0	0	0	0	0	0	0	6.57840696763634	0	0	0	0	0	0	0	0	0	0	0	0	0	0	0	0
ENSMUSG00000004032	Gstm5	8.92982437280904	35.3481699632712	243.016433443735	165.72378584228	5.52570982850082	91.4458289138212	145.788628231756	33.3379171329821	139.746400822799	23.8432937174714	0.622769334050064	55.9901829887863	42.1837677357834	0	36.4200433824922	52.3679430174605	98.7842760002951	10.0677331919824	81.59465050006	161.210644831673	119.793076501139	235.918608752521	119.466074292347	83.9415856307353	36.0314815110498	55.7187495187506	96.2623990968277	11.5906579559003	106.622401919557	56.3561388737279	59.5088525853885	0	109.406350179247	38.7399693861111	112.537875106691	81.867914149954	43.9282479261615	38.5744704840355	68.3554949495231	131.885608034838	66.446099245595	62.8021096217022	102.512239002351	0.708837830761222	75.7704108059517	134.911629155448	73.7836024558478	42.7800947312545
ENSMUSG00000004035	Gstm7	0	0	0	0	0	0	0	0	0	0	0	0	0	0	0	0	16.223685266446	22.5470689318256	0	0	0	0	14.0989785543232	0	0	0	0	0	0	0	0	0	0	0	0	0	0	0	0	0	0	0	0	5.09247515891042	0	0	0	36.2132234861551
ENSMUSG00000004038	Gstm3	0.527578556662735	0	0	0	0	0	0	0	0	0	0	0	0	0	0.17751645859201	0	0	0	0	0	0	0	32.0441379054704	0	0	0	0	0	0	0	0	0	0	0	0	0	0	0	0	0	0	0	0	0	0	0.451943932153946	0	0
ENSMUSG00000004040	Stat3	0	0	25.0951245401761	4.0798514755482	0	0	0	0.439880354842591	0.371213653849949	1.09314459107569	0	0	0.037724960754579	8.108503931165	0.170994913456374	0.630807430601714	0	1.23799196330506	0	10.0621983842366	6.38557128964127	1.5564253897158	0.0987214612219279	0	0	0.457616025034949	0	0.0299005677540765	9.27983739959493	3.57888774556499	7.28188826312466	0	0	0.155903267163168	0	0	3.55436167598206	2.65143497625543	0	0	6.95104594863458	0	0	0	5.10666447662385	5.16189514951898	0	10.0585580255003
ENSMUSG00000004043	Stat5a	0	0	1.83215338310384	0	0	0	0	0	0	0	0	0	0	0	0	0	0	0	0	0	0	0	0	0	7.8025261111325	0	0	2.75557646439409	0	0	0	0	2.80029071176379	0	0	0	0	0	0	0	0	0	14.0219931027759	0	0	14.8685308586337	0	0.46325665705749
ENSMUSG00000004044	Cavin1	0	0	0	0	0	0.364711820104514	0	14.7986363109603	8.62694011764679	1.39791893307432	0	5.07166560930967	4.80944344946361	0	14.6628495819326	0	0.7577981243775	0	0	3.66391087015067	4.38038422297606	0.14504682785128	6.38025400589865	0	0	0	47.4881565658773	0	0	0	19.1336982691745	0	0.142783939489546	9.52374680904948	10.7829263432384	0	0.869502537707686	0	3.65312193527281	0.223226002936869	0	7.10998769513535	16.8873188489354	0	1.1737383184447	0.330358792893127	0	0
ENSMUSG00000004054	Map3k11	0.0909833580353651	0.185703438293626	0	0	2.30025038750987	0	0	20.3969199160298	0	0	0	0.106358353302311	0	0	0	0	0	0	0	32.4406967586124	0	0.0684402751253013	0	0	0	0.382329901824779	0	1.1991063782924	0.106694533435118	0	0	0	0	0	0	0	0	0	0	0	6.34081236993904	15.3928147180397	54.8513688640532	11.6782011675689	0	0	0	10.2741686523365
ENSMUSG00000004056	Akt2	0.339474717044869	2.02918311086222	0	5.22819599207467	0.471573289048089	0	0.0669945477780955	0	0	2.86678711892488	0.558055818900562	3.00465703937883	8.66887962287567	8.27516483657328	0	1.07260021517823	1.44002779184517	1.10263632350837	13.554571677679	3.63179834324219	1.29944043083736	0.0729607308235228	5.40755767823778	0.956849546993313	0	2.85307858585104	0.58059301095988	0	1.76299587283599	3.49202348171199	0	0	18.7456631100392	0	0.473939453662276	0	3.12409159480484	4.11365169195958	0.765656311750548	5.33358637573847	0	1.36745871881617	0.197548250550761	0	13.2513792416328	0	0	6.74016850329002
ENSMUSG00000004069	Dnaja3	24.7524970066151	5.05215887799438	3.93021474849022	9.12468973195842	13.7537387492921	14.156791490865	27.9657539690906	23.2104728304404	24.7477311212306	59.9480063211039	2.44140861630669	11.0574352751848	0	22.0095212217918	22.9630607885103	31.0037630339757	22.2349437394036	22.6575467848192	42.957042078686	0	0.102986459859309	0	37.8259320399571	14.8256646259405	43.696739086336	7.24389088913643	0	9.90320256213187	33.588159149834	4.50477620973752	40.7782119429578	57.2358203480644	25.1369811508713	46.4469654429707	39.8363960261094	2.31560110933262	9.908880639786	65.7167337178146	6.14098637525815	17.909578565126	44.7384740331533	88.9693552280842	0	20.4937845533197	48.1910457097603	13.3281870053007	3.86480079649525	24.0351423821716
ENSMUSG00000004070	Hmox2	23.0863807379696	20.0582329472741	4.33440462790194	10.3761619877835	1.97186552163397	10.228162311408	29.0909545456725	0	0	36.5362199339682	0	31.7287548745884	0.162113532299898	38.4738666973676	0	31.5431133838457	16.4839796787046	4.3526938495783	37.8093999824208	16.2149127210119	15.2648509704321	34.7324671999892	12.4440991991272	0	24.8050763381917	18.026156433464	0	0	10.9755323839482	20.0450217270617	24.9332645236143	17.7069641566758	0	6.92286922480356	5.75895936942983	0	20.9012296337893	17.6421291326801	25.8587727426604	39.1868364772208	47.3455556395248	40.6010122780395	26.6874587895597	0	0	31.2685268025698	57.4283910106665	8.80742333052118
ENSMUSG00000004071	Cdip1	17.0325881520285	2.70255706874166	30.0355684090937	3.03711682365034	15.5673843897966	16.3167176716383	3.57513734229738	0	13.4636417516529	0	7.96453263360058	0	52.6035841685631	4.38800022328797	4.25270242037646	0	3.15375550776435	13.6841274328894	0	14.8670229538806	5.32876964039175	0.633828889752486	14.5677381020634	6.92700122364329	7.49507363050907	0	23.1601355293087	9.41940736315464	0	9.26751747914069	0	0.0843449646890168	2.67403058274801	6.37611622830369	0	0	10.0029541732314	24.8169199234668	17.3888063716333	0.696755719226026	0	0.522174522684844	9.31625997872329	12.1395571830645	7.97848814884928	0.103114948669304	0	14.4815602401216
ENSMUSG00000004085	Map3k20	0	0	11.4084767297796	0	2.94140768603412	4.84288310416978	0	0	0	0	3.98927367613907	0.0397315086881655	3.49692033511337	8.69929244957308	10.2695931861565	8.34941900249063	0	0	4.49355048975798	0	1.22745690025142	14.1384021248602	1.38651502859161	3.20394919075294	0	0	1.16257178270408	3.02360418390697	1.43485534910348	0	1.13027948545715	0	5.03357239261919	1.26511223858644	4.13346624444834	0	0.613052698330706	4.28444741065236	10.3563613337099	0.0393470109353587	0	4.57065646328062	2.90742487157022	0	0.91950845716869	0	0	0.265710856494257
ENSMUSG00000004096	Cwc15	51.2908111565465	95.2527428505814	132.121261169488	37.8694952593055	216.836752566299	137.123132095302	131.370380603959	100.033580695068	148.857118240043	31.918110839832	104.61692338711	100.359363050167	121.937134749223	140.346000722107	109.769918023976	112.327635692589	114.773212933647	117.390666206705	93.6934156231727	102.602331550588	144.12492896558	115.084871163038	128.91481163709	124.989969373988	91.5190951236978	105.685683048066	24.4715440097362	113.872553308503	72.796912722789	74.3768685469019	141.688184199829	97.1760296864885	158.442184341958	108.410758887045	127.403633643611	104.944044572061	83.6661955818363	64.3162852165129	114.689077180187	194.189145280498	195.137588776041	67.8005892175828	87.8766545629488	94.8565792480984	101.838049162268	50.5377455997532	129.66899337558	140.161584144544
ENSMUSG00000004098	Col5a3	0	0	0	0	0	0	0	0	0	0	0	0	0	0	0	0	0	0	0	0	0	0	0	0	0	0	0	0	0	0	0	0	0	0	0	0	0	0	0	0	0	0	0	0	0	0	0	0
ENSMUSG00000004099	Dnmt1	3.32842209792084	31.5756261020529	36.421055534667	10.6453476628883	31.5446668557372	6.38416249881199	36.136352321367	16.85309622304	31.5806418103633	28.6530452934777	5.933910328098	15.6183284203733	24.0188437910634	13.3441430767648	30.853212351283	21.440211496342	31.0745169062378	13.8078203293861	23.1605574407184	79.2262988156371	18.4593282455918	46.3014464947022	25.6686861904582	20.708414518116	45.221801579203	9.35728723731996	6.65460847762074	6.13978185304336	26.3327228467016	7.99751701234727	33.0906028635576	31.2717331626774	18.8842550546467	18.7917997087244	52.9909538064613	29.225353212021	6.76460480467934	25.9023111453873	28.3467513343185	31.3142629153067	30.2894148085844	33.4531812260133	10.3118740724663	1.41219867137016	39.0625939259992	69.4742033647223	16.5577360636475	27.3239791002109
ENSMUSG00000004100	Ppan	14.4238844230856	32.0844894979124	33.9832045080993	5.7452425391898	13.1017758085789	27.8808401990519	14.0791953507145	29.6547545745718	31.3555477143133	19.2666380271175	7.25532495640193	48.8675726365156	5.11641482597549	5.15823430503532	16.2744109939948	10.301801165797	14.8598542793871	1.42818992333816	13.8230605363796	40.9325826782168	8.25085128359359	22.7396403628733	39.8538423892945	10.6034096652825	42.3617668051629	41.4665854316961	19.4986283884846	35.7145554232092	17.5223387698629	17.0310007752236	49.5699273631341	17.4298321835277	68.6895946902134	82.351267390234	36.0137168864809	51.1301380612956	54.3037653113189	39.0735267603913	15.8178780832869	29.2967682383395	79.7702872970956	63.1331037759727	49.2558242894222	33.7108684838196	28.8577877406067	66.5894912023527	1.09305239415048	31.2855067525175
ENSMUSG00000004105	Angptl2	0	0	0	0	0	0	0	0	0	0	0	0	0	0	0	0	0	0	10.6551921716304	0	0	0	0	0	3.26749916911343	0	0	2.67370344107416	0	0	0	0	0	0	0	0	0	0	10.3361044214458	0	0	0	0	0	0	17.4375153650902	0	0.764622042586082
ENSMUSG00000004110	Cacna1e	0	0	0	0	0	0	0	0	0	0	0	0	0	0	0.202946317532533	0	0	0	0	0	0	0	0	0	0	0	0	0	0	0	0	0	0	0	0	0	0	0	0	0	0	0	0	0	0	0	0	0
ENSMUSG00000004113	Cacna1b	0	0	0	0	0	0	0	0	0	0	0	0	0	0	0	0.164857145754719	0	0	0	0	0	0	0	0	0	0	0	0	0	0	0	0	0	0.199194048985918	0	0	0	0	0	0	0	0	0	0	0	0	0	0
ENSMUSG00000004127	Trmt10a	6.24363028090633	13.0091824268115	0.433723046843166	0	14.9672785743692	23.3454736940513	3.41412648592266	0	0.886798515603927	0	0.0997867613986937	0	2.56847103350123	18.5298055802247	0.671095007011645	0.171243913312168	5.45280215073639	11.3817389909861	26.7010640252728	3.53781463972736	3.43481019382323	0	0	0.522792233058219	0.955302388763229	0	17.797143263311	33.0006448231711	9.40646884322639	11.767797169936	0	0.121526120136181	0	8.93855823227783	0	1.9875382641037	15.8090393605883	5.1081108282075	0	1.00390129455184	0.734255480543963	18.997109800781	10.4205463773785	6.01961153821222	21.1143397605875	10.9199196054303	0	0
ENSMUSG00000004151	Etv1	0	0	0.0867272117333808	0	1.391045440968	0	2.62296049751871	0	6.25067563818959	1.21842357992791	0	0	0	7.20197515333	0	1.93124393114196	0	1.18274663401598	0	0	0.0303010703196163	0	2.40505853460322	0	0	5.27366387765766	0	0	0	4.72538367755075	5.2177007733746	0	0	0	0	0	3.18351418538292	2.69654158618299	0	0.421553979222461	2.99854971758106	2.70795560229884	0	0.476930146960732	0.562936134277462	0	0	1.35559966146664
ENSMUSG00000004187	Kifc2	0	9.76928299379642	6.72625680309542	6.05719142753994	2.88881025623455	7.90843292255263	19.4560863462669	18.6669939447009	15.3310618972678	12.3950134978021	0	2.57249825581981	7.54717666980137	25.687777073628	21.1028832344975	4.08492193898561	9.22506097237745	0	29.7324524070644	12.6674793097335	29.3541883843597	21.1887433510421	7.58081147954813	17.1263789900753	10.0133039053476	14.1023533832318	12.420061735204	10.8760817942	12.5160529411161	18.6492463132112	24.315399459038	1.69618448556602	14.3399959285753	15.594840619375	6.5712667806276	13.5461559772934	0	2.72220213579842	30.9214552439892	64.3269797375035	46.7263877818566	0	25.0996271657456	0	50.1586304791602	36.1946264875386	9.6208086006296	26.8573492458361
ENSMUSG00000004207	Psap	10.7125941074548	0	0	30.3535597205964	5.02457558645331	0	9.4015519282443	0	34.7984391276124	21.3663083753789	0	15.3221146114492	18.7299618289246	0	0	0	0	17.8441765230343	0	0	0	0.189607496903258	0	1.93404028333597	0	0	0	0	0	11.3087641584164	0	25.6099468768033	1.86649413611153	22.1927505381937	1.36850592973181	0	33.4493208125801	5.79063187560327	0	0.875413636152932	45.3120764952329	0	1.54014202770861	0.82534142466549	8.01260808909433	0	0	1.2042309529122
ENSMUSG00000004221	Ikbkg	51.938124791735	0.0435178032647394	0.758323062692663	0.0978100732468046	3.93914878913912	11.0765962817619	2.17956972226969	0	0	0.0475608006538708	0.294414010696417	0.0498481012209721	27.4761448443283	10.1536439513667	23.5880630665858	0.0336828964877398	0	0.440696089168155	23.7872049540434	0	24.8386578896189	0	0	0.0467412941472072	0	17.1575022030882	0	0	0	6.84953963762266	11.4818385700495	10.2785623602628	7.32567878546046	0.305238476420777	3.19491293109375	12.4542221538542	0	7.2341430864029	14.811059617762	20.6348630776474	15.8033954026075	0	0.173701180601415	0.279252388320852	0	0	5.54370296870499	0.481530395160677
ENSMUSG00000004231	Pax2	0	0	0	0	0	0	0	0	0	0	0	0	0	0	0	0	0	0	0	0	0	0	0	0	0	0	0	0	0	0	0	0	0	0	0	0	0	0	0	0	0	0	0	0	0	0	0	0
ENSMUSG00000004233	Wars2	0	0	0	0	0	0	0.883807487766834	1.05719983364918	0	0	0	0	0	0.496217629075043	16.0863766792811	0	3.60641613263984	0	0	6.24084919153818	5.75934369869115	0	0	6.24773726241463	0	0	0	0	0	0	0	0	0	0	0	0	0	12.4022113114812	0	0	0.0378821037595969	0	0	0	9.12626834843765	0	0	0.55573658506409
ENSMUSG00000004263	Atn1	0.902159331893277	0	0	0	0	0.379194579337649	2.18097837485165	0	0	0	0	0	0	0	0	0	0.262630132574115	0	0	0	0	0	0	0	0	0	0	0	0.352648627466856	0.166566016375172	0	0	0	1.18392715136946	0	0	0	0.974272199181767	0	0	0	0	0	2.65860415089639	0	1.67445226863037	0	0
ENSMUSG00000004264	Phb2	63.6218872572397	53.8222057553737	118.88952468066	97.074787731138	41.6956908622132	48.7914703483409	162.287048364624	78.1490002906362	43.5172877811867	57.058889541848	148.241044156621	130.696680280878	93.4764155385373	60.1673763692232	21.407109845947	55.9855399066337	96.9923171160617	62.5794373139613	70.2248460025436	99.7026224669337	104.350822706762	77.2448091095757	54.471535524978	110.418198725971	112.625274246419	82.1793598506633	85.5848887074979	44.5145868544873	140.926662369622	57.7022671036098	120.635598928599	70.6504095131455	76.0397060257799	111.589867061934	122.816008869281	81.9857319287828	115.04454693949	96.2122978643289	90.0192504713315	111.772285649659	192.411091156453	127.505524357408	168.985366408325	116.587045933458	112.483360747877	119.519599593966	138.259662275482	80.0691976912797
ENSMUSG00000004266	Ptpn6	18.8835277714278	0.125956239998942	0	0	0	0.155629466894467	13.9809157233616	2.9912492081266	0	0	0	10.676602236529	0	7.08382783932046	0	0	0	5.61234805348909	0.143136720116231	0	0	3.52797161261537	20.5871475654628	0	0	17.1151986351133	0	0	0	2.87121291610307	0	0	0	0	24.9273208579673	32.6524548718997	0	5.08915138758888	19.2908501338409	0	0	12.8497422156193	0	46.5556187261418	36.7294732578892	42.5025687030044	35.6408418769323	1.60814178255357
ENSMUSG00000004267	Eno2	0	0	0	0	0	0	0	0	18.8854157419214	0	0	0	0	0	0	0	0	0	0	0	0	0	0	0	0	0	0	0	0	0	0	0	0	0	0	0	0	0	0	0	0	0	0	0	0	0	0	0
ENSMUSG00000004268	Emg1	25.8325559988727	19.8865650579677	57.83881188999	27.5715869471255	27.1520538094024	31.4440064601881	78.4884951374053	71.9265632937255	55.3540705562529	31.1439047701386	41.4101272341864	49.2243542549169	32.2782322239404	43.6044521692494	22.5589617161361	31.0793802033042	7.82447286166405	17.5924508756272	26.7552566359229	24.5344394342538	15.0472289200656	46.2773282079117	35.4657559870556	11.6209432568668	26.1764475681069	20.0792532896164	44.3083037293595	56.148457105071	35.3714491194088	28.1206012101434	50.0576014181085	13.3926401962858	43.6756404198739	50.9847102279569	51.7229061531834	68.7415584241749	95.2293531559923	36.8545343990999	27.7002453019623	63.8736966756295	55.047407490623	64.7757946318462	0.304127067071994	69.1351021840436	29.9949435433112	8.44233606941975	29.5482833734772	29.2488771861905
ENSMUSG00000004270	Lpcat3	0	0	0	29.3702579491499	34.8832776347752	47.2368767589832	0	27.9981108943637	0	24.6680175949524	30.0775863834528	28.4521613241981	0	0	16.7350545120316	7.18863922409394	54.6195133427165	18.3733050051967	0.736356957954124	36.5488563070615	31.9298362977758	69.0951069865675	42.1142390356909	9.27960576582254	14.3947613630744	1.00054495192196	59.3630212300581	5.75304124649442	0	34.4650980027207	13.5090087453967	27.2872994941765	3.60459540753582	0	25.2796713482406	24.9472716821857	12.2705675925936	4.6128053939228	0	55.2510655313772	0	13.3127339983272	34.4851058672576	0.277201575187528	55.2542142128655	64.5438997059856	0.730485443336795	23.9916251468919
ENSMUSG00000004285	Atp6v1f	204.959057998331	194.2273658693	46.6456964345271	187.30306980426	72.760253863259	20.5114659566461	72.8067502100725	159.666016645068	187.972921103394	158.931820194419	135.894361635231	157.82809207372	124.422669810034	49.709268316822	42.4726914200755	116.668300935154	52.2789614794758	184.249935575564	119.603858377912	42.9087736806263	98.9204807931049	164.699172070183	71.3721183370449	102.702451471072	114.374964618946	67.6718531170097	101.265689360327	65.387112882703	115.597755635772	100.190320668189	202.768942954811	125.378829683302	121.898396716931	133.205726532255	116.223359286883	159.35692360542	165.983956281677	171.324595566369	126.866801909314	51.5980710899498	120.145853939076	136.190041819848	159.027270894917	260.348866816814	138.623685032117	136.001536023643	72.9866970242718	113.321500355018
ENSMUSG00000004296	Il12b	0	0	0	0	0	0	0	0	0	0	0	0	0	0	0	0	0	0	0	0	0	0	0	0	0	0	0	0	0	0	0	0	0	0	0	0	0	0	0	0	0	0	0	0	0	0	0	0
ENSMUSG00000004317	Clcn5	2.29504964511213	4.34535829647766	0	0	0.234913665679492	4.64556404829481	0	9.6364091019398	4.20760806349221	2.2903274838104	6.67187600907564	0.882527289779261	2.03993805205002	5.45731460354593	4.40980830906961	4.65139858981279	7.14710800006313	9.23783971195866	22.1687682345158	4.79296618457276	0	0	1.7246687550024	1.65504669723127	0.60748579670263	8.15319684131262	0	3.20880976773561	0	5.62007585813538	7.83957638337691	10.6645855841756	19.1413765391349	5.4040430574845	0	16.4529807916478	2.29548713341014	3.91342308438363	2.00240653756473	0	3.77640777849076	15.2614532420511	0	5.4977021451312	0.040848753718527	1.50038913347545	0	13.246808148394
ENSMUSG00000004319	Clcn3	22.5676355630109	0.951013513323395	0.427808859799926	10.5480294385314	2.58054815342073	0.689707204524282	14.7762713062244	20.9074669697061	0	0	8.04244704692208	7.98068947361035	16.4217940873365	0.0157125056447681	0	10.2732143700425	0	0	0	0	0.873216106020496	26.5459825539636	5.41763246662147	0	27.7313772851905	0.0851289295785827	0	10.3459012111601	1.28284691967031	0	2.56437547210629	0	0	3.85729456764973	8.2490340442507	0	9.31780128525751	6.42005537976429	5.21330274109416	0	1.96601261520883	0.131820696239842	0	7.08435058401174	0	6.45566868256171	4.52152702626268	0
ENSMUSG00000004328	Hif3a	0	0	0	0	0	0	0	0	0	0	0	0	0	0	0	0	0	0	0	0	0	16.2443044008617	0	0	0	0	0	0	0	0	0	0	0	0	0	0	0	0	14.2396669573965	0	0	0	0	0	5.4379127200591	0	0	0
ENSMUSG00000004341	Gpx6	0	0	0	0	0	0	0	0	0	0	0	0	0	0	0	0	0	21.6846314694269	0	0	0	0	0	0	0	0	0	0	0	0	0	0	0	0	0	0	0	0	0	0	0	0	0	0	0	0	0	0
ENSMUSG00000004344	Gpx5	0	0	0	0	0	0	0	0	0	0	0	0	0	0	0	0	0	0	0	0	0	0	0	0	0	0	0	0	0	0	0	0	0	0	0	0	0	0	0	0	0	0	0	0	0	0	0	0
ENSMUSG00000004347	Pde1c	0	0	0	0	2.09472587095849	0	0	0	0	0	0	0	0	0	0	0	0	0	1.05928448485479	0	0	0.0129636460732182	0	0	0	0	7.22117439778849	0	0	0	0	0	0	0	0	0	0	0	0	0	0	0	0	0	0	0	0	2.36524342587328
ENSMUSG00000004356	Utp20	0	0	0	0	2.63774026802779	3.29225218162063	0.187366651713148	0.410897160563326	16.340821220783	2.30697163363824	0	19.5019027006398	0	0.0525989182982325	0.524821431113333	2.97300522082834	0	0	14.903930289361	0.0379000487107458	10.8236053030371	16.0181246251395	3.65793391398815	2.26722086749337	14.4868992541378	7.72997849380843	3.30553274670948	1.368592287544	0	1.50250745234982	11.0215736224978	9.40875978884321	1.70738736074773	2.57281408608574	16.2004051311011	7.77164682541969	9.78576127936455	7.23046852221465	19.8609775862689	36.7028833130603	0.772982117208522	0	23.895280656849	3.01994523210478	3.5776443133245	0	7.68512609861187	2.91594152496516
ENSMUSG00000004359	Spic	0	0	0	0	0	0	0	0	0	0	0	0	0	0	0	0	0	0	0	0	0	0	0	0	0	0	0	0	0	0	0	0	0	0	0	0	0	0	0	0	0	0	0	0	0	0	0	0
ENSMUSG00000004360	9330159F19Rik	0	0	0	0	0	0	0	0	0	0	0	0	0	7.06965214964439	0	0	0	0	0	0	0	0	0	0	0	0.818972925215355	0	0	0	9.43306068113943	0	0	0	0	0	0	0	0	0	0	0	0	0	0	0	0	2.34569384948956	33.129003441637
ENSMUSG00000004364	Cul3	137.536254394319	3.76612517808452	29.8949570922406	0	75.978469643881	47.5179909444974	35.1955643656495	44.4329107182934	29.6648025096118	0	13.3929273817177	110.503819085076	0	0.0550437479708263	36.9168298145945	25.3379986277524	64.4583703178005	41.8059883315746	77.2014788016021	24.6695562497596	18.271526748263	4.64443038382116	35.8348234565393	0.0777902514947365	89.6018902912957	72.5425090294179	0	54.3653436001582	24.4675766358597	82.7839595852715	41.3391923511241	66.2372967967696	12.8225427653967	7.21360012755376	0	60.6015571915698	52.391689202311	24.8316452161657	14.1175208299967	23.9079721637137	0	28.3232261723717	0	8.73733904011976	19.4876637183805	40.6104037241898	0	0
ENSMUSG00000004366	Sst	0	0	0	0	0	0	0	0	0	0	0	0	0	0	0	0	0	0	0	0	0	0	0	0	0	0	0	0	0	0	0	0	0	0	0	0	0	0	0	0	0	0	0	0	0	0	0	0
ENSMUSG00000004371	Il11	0	0	0	0	0	0	0	0	0	0	0	0	0	0	0	0	0	0	0	0	0	0	0	0	0	0	0	0	0	0	0	0	0	0	0	0	0	0	0	0	0	0	0	0	0	0	0	0
ENSMUSG00000004383	Large1	0	3.84965602426055	0	0	0	0	0	0	12.0272048678783	0	0	0	0	0	0	0	0	0	0	0	0	0	0	0	0	0	0	0	0	0	0	17.438998239542	0	17.0080899697509	0	0	0	0	0	0	0	0	0	0	0.0586509437794096	0	0	12.9561063733032
ENSMUSG00000004393	Ddx56	105.809909797326	50.856385840552	32.4738454457566	97.7065868684779	11.1517681181588	32.0212082591091	80.3460083725169	46.0490593155518	114.487683923701	93.0413561026717	79.4956572663811	99.7503209884731	63.1407568075204	27.5323046995963	0	36.2355095196334	18.0046279200533	45.2928754793664	69.5101975551256	27.6210856774426	70.1426832442171	43.7506012357052	37.3781875300059	32.4747735218498	53.3609000486176	43.1725249711441	0	20.3553692569083	40.1863506981082	31.4588165155476	275.494019218245	60.0785220964747	84.5185093630806	132.911894967651	35.8765742450277	29.1464062568614	18.8214370027099	36.1903501472609	105.188663151893	45.2040146752627	77.6315125769182	24.8751326309867	0	121.417791886502	0	99.8803226956108	74.6106430906505	71.8685101849547
ENSMUSG00000004394	Tmed4	0.158782251557586	66.4375792633539	4.94146008598054	21.488127616099	12.1974444817242	12.8139215056249	0	87.226914465811	12.5841513874061	0.177097379845222	48.4190290088923	39.7214754789008	7.09570484282902	62.8082524194384	17.7374641035559	25.5860106818991	10.4002979497325	82.7051801060369	100.175199647626	30.7033375787672	8.32402956548799	0	41.7432835487877	36.3755859350665	162.599049599094	0	0	34.0056493747487	0.931005329630131	9.85018499041419	32.1930777199488	59.6350655572214	13.8741016831915	0	19.1379710790374	16.012732519688	51.1430146064126	73.5157058886718	0.250683891602073	60.8437932986537	89.5610158102167	12.3984082948228	0	0	80.1144963218756	46.518476884391	34.3433248101495	14.6200614361739
ENSMUSG00000004415	Col26a1	0	0	0	0	0	0	0	0	0	10.0486734189721	0	0	0	0	0.483893017690818	1.93783767733648	0	0	0	0	0	0	0	0	0	0	0	0	3.42253774333354	3.32683836522328	0	0	0	0	0	0	0	0	2.93829974315189	0	0	0	0	0	15.2195181919638	0	0	0
ENSMUSG00000004446	Bid	24.8411478007233	0	0	14.7475548749534	6.15721952318663	27.7613158224944	25.8382307266127	26.9545257868636	45.9502769438135	0	17.1510674597388	10.8184421368163	84.7387526276417	82.3573860308175	21.6335057692004	32.4723996049494	46.6223970558331	13.8934718049357	31.9725499728697	32.6655715606391	73.7673155296485	21.0311567353844	27.8181782849119	60.5447224697728	0	50.2492151272161	81.4713112356036	13.2400977419322	35.2996309212246	37.7706037132432	52.8786955461189	0.136520047071293	54.3905855176828	57.59858648327	27.0796098429051	19.3931266765605	52.8394067911829	22.9534039243848	41.8335629091081	64.508038970389	12.0554726482724	57.050140703079	49.6026962914604	48.7396892431417	48.6248375432977	67.5948987314924	80.022519726798	7.7850370192261
ENSMUSG00000004451	Ralb	0	0	24.091658365583	0.804502732283555	0	1.85751502860126	10.3687583898578	14.875852426013	49.1387109321804	8.76276398578579	1.04936001175535	20.9104190121767	26.6091441997443	19.9130862664163	4.86218660305373	4.54356994366668	5.32984680812175	18.7764245098746	6.42686776703624	45.1619747986443	3.92259340497803	0.0527670356493449	29.2521234677621	21.1449840307929	3.6958466522855	3.38990131919145	29.6329053609175	2.65794819750142	38.6625929301898	27.8972737770749	15.4264327797417	5.89833063411469	35.0101296044247	4.8204151765144	0	7.71729258961027	0	7.43774092681637	23.1464115263787	0.64966464303006	32.1193982221213	21.9097227311351	17.1446236269064	19.3857800981146	8.44506968661802	39.0592314183554	21.305874821153	21.8750340178867
ENSMUSG00000004455	Ppp1cc	14.039151986287	15.5643507757104	14.9304542405116	17.6069558254674	1.96424598376281	19.358414856373	8.65063184951728	10.1994259652097	2.71128804339945	10.0259667943801	8.600546358029	31.2882729962185	13.9605602358295	8.85215676880478	10.2632405547117	7.10046082239652	0.176416268960416	12.108330982647	13.8218903599154	14.6759747617163	25.8861760552909	24.5402160916064	27.285316354777	16.8279579793065	25.155778668753	50.2945271276473	9.50064593889852	11.6474238490164	5.80366534981231	14.8810001194991	57.53330653606	29.441122300655	20.4926228855179	30.3651664247795	30.9275945231868	17.4611472435983	32.6621039007061	37.2439760084406	14.5108194940852	12.9788252995524	24.9324207984169	15.5541363406575	25.5083024620337	16.1388959142767	57.3820004630607	12.4590805034682	33.4657910582894	11.5808752387538
ENSMUSG00000004460	Dnajb11	6.94647816842011	79.7253955663515	37.5347653767431	74.5194273750315	104.749426365746	21.5611256483707	31.1504151308348	63.4568191868612	25.9558471586607	97.025503074337	66.7758452474317	61.0899571511492	100.735775928847	62.4981615055083	57.3180128367298	107.629657109812	14.1865720562285	81.5094381633949	23.0527968777554	83.3766169861018	102.712762839906	31.5128128598572	98.5278317057426	53.0653796899983	90.3962393991613	71.6289045473856	56.1117821682216	50.0886530955088	64.6667785966726	36.4633393078404	64.2004516541211	16.4743752723547	2.69061243700032	42.6860351182032	50.9432675849759	113.092927751623	58.3796563468642	62.9516254106659	60.2343192767694	0.247438712155299	0.278426438757186	30.3657555440723	70.5228940351517	1.67965651615484	46.4041337313496	89.5339196790232	48.6887961379563	48.2720828770469
ENSMUSG00000004462	Tbccd1	0	0	0	0	0	0	45.6167413075665	0	0	0	1.76735575629011	1.64579907843187	0	44.8701477074575	21.4464453095178	11.7274321612902	8.94225469904463	0	42.897471111133	12.5891001178678	0	0	0	0	59.5866675320841	20.5722706694954	51.8784750128853	0	16.3599205969543	0	5.62933483376214	33.5413890630192	10.2357377909867	12.2766418158962	22.653382094856	0	13.0270457131141	17.4911394079601	0	0	15.8389814586851	0	0	36.041334337206	0.692523949051919	1.09640728174282	23.854594218455	61.4810101385999
ENSMUSG00000004473	Clec11a	0	0	0	0	0	0	0	0	0	0	0	0	0	0	0	0	0	0	0	0	0	0	0	0	0	0	0	0	0	0	0	0	10.1470092229655	0	0	0	0	0	0	0	0	0	0	3.49825036893811	0	0	0	0
ENSMUSG00000004500	Zfp324	0	0	0	0	0	0	0	0	0	0	0	0	0	0	0	0	0	13.5448533553356	0	0	0	0	0	0	0	0	0	0	0	0	0	0	17.3724645171144	0	0	0	0	0	0.22863882575767	0.167653197766865	0	0	0	0	0	0	0	0
ENSMUSG00000004508	Gab2	0	0	0	0	0	0	0	1.81182020777577	0	0	0	0	0	0	0	0	0	0	0	0	0	0	0	0	0	0	0	0	0	0	0	0	0	0	0	0	0	0	0	0	0	0	0	0	0	0	0	0
ENSMUSG00000004530	Coro1c	17.6420817196776	11.1386032973402	14.517474738913	0.738737297835706	8.52528285833477	6.58803496179546	25.0634547748592	5.20373361827653	12.6710605989146	1.19738646513729	3.91196320607503	14.306673272818	18.3347486182404	1.38776999100702	1.46897441122327	5.45545116613255	5.81297447822881	7.72946465417147	0	5.99972987584172	1.41742788213649	8.04866558771004	15.7661565078572	12.6304998304946	29.7893500758617	4.21053464315062	1.83606703575342	9.01986640644502	8.26702675420285	21.2878401102002	18.8871639745347	3.20957726558338	6.67766089192615	7.8895807686458	8.6652028194749	0	22.222571259004	8.55824220721642	10.2260039713976	14.9139177417445	3.28640577841406	23.2855039891384	29.4454416478528	84.1777197274558	33.7877017233062	6.43753538707071	12.4746414171818	8.33065368117859
ENSMUSG00000004535	Tax1bp1	10.7649312732002	0	70.1731562788385	45.4141832635439	34.2640309121966	59.6649823288712	33.4717930281173	22.3008391693646	2.96453077989324	27.1404083266874	15.7730000365693	13.5551810431587	76.6583474189782	0	29.489408643087	27.7515578894308	7.28535094013772	30.5856142237658	52.4268072499227	50.3344928873952	25.6061179727463	42.5974848052325	52.7792868683521	33.1986696619077	2.02264213017501	8.87272478900962	35.5786703097659	33.1878884263791	34.5836377932165	46.3203903409846	39.6199597274635	41.5230826784351	6.9717320357386	24.8762484230566	21.0103670462607	20.2189453843975	11.3719623189893	56.2342314291009	8.1972202368529	0.0400716481100265	27.3019821463293	8.48380725728716	24.8157458856206	24.2545135635257	17.8860546829453	28.9399725339071	15.530949642038	32.9836623785572
ENSMUSG00000004540	Psg17	0	0	0	0	0	0	0	0	0	0	0	0	0	0	0	0	0	0	0	0	0	0	0	0	0	0	0	0	0	0	0	0	0	0	0	0	0	0	0	0	0	0	0	0	0	0	0	0
ENSMUSG00000004542	Psg19	0	0	0	0	0	0	0	0	0	0	0	0	0	0	0	0	0	0	0	0	0	0	0	0	0	0	0	0	0	0	0	0	0	0	0	0	0	0	0	0	0	0	0	0	0	0	0	0
ENSMUSG00000004552	Ctse	0	0	0	0	0	0	0	0	0	0	0	0	0	0	0	0	0	0	0	0	0	0	0	0	0	0	0	0	0	0	0	0	0	0	0	0	0	0	0	0	0	0	0	0	0	0	0	0
ENSMUSG00000004558	Ndrg2	7.63529019485773	30.5449629191194	0	34.7932629999135	0	0	19.8295775534264	0	0	0	0	22.1353743796843	0	28.9784349359123	0	0	0	0	0	0	0	0	0	13.3908235101743	0	42.3521812560384	0	0	18.1462997000902	0	0	0	0	17.0522009491541	0	0	20.067814341305	7.07622969084839	0	0	0	0	0	0	32.2240750823638	0	0	0
ENSMUSG00000004561	Mettl17	0	0	19.6544396694397	0	3.04938056602694	7.35943131938687	16.9675251760679	9.14855110455243	7.34925893246469	0	10.1241587028355	0	20.1882799363423	13.8505737258631	0	0	0	7.29213269358823	0	0	4.56668423013422	0	0	0	0	5.76535675570951	0	4.52049135177947	0	0.289497610324606	0	29.4205859626813	0.645045328651137	0	29.4171552730039	0	8.64180393711137	6.77327775753571	0	0	2.26949107259006	0	0	20.8789343616436	0	0	0	1.05934820900103
ENSMUSG00000004562	Arhgef40	0.166808674460941	0	0	0	0	0	10.2774069849362	0	0	0	0	0	10.7481928751448	0	0.022450711674139	0.0263523336403212	0.262224760962965	0	0.0386908247892803	0	8.2784184445812	6.39939020514894	0.27219352529268	0.0731375449611906	0.191751256686379	0.105144411308797	0.0570575337112387	2.39080220744729	5.35981007692487	0	0.143155275180353	1.12208257866816	0.04940825689263	14.8538594947568	0.217355601264756	0	0	0	2.84424405355036	0.0386220177761214	0	0	0	0.0436954827181575	12.81643637218	4.97273481281908	4.22205458824862	0.869383228770038
ENSMUSG00000004565	Pnpla6	0	0	0	0	0	1.88854384223639	2.95569057664838	6.62590384501707	0	9.98301107641019	0.0820683861534318	0.0833714375958102	0	0	0	0	0	0	0	0	0	0	0.0323269183014129	0	0	0	0	0	3.88902564524441	0	5.31730031888576	3.4981678384426	10.1926207726498	0	0.348490641788584	13.0770098531582	0	0	0	0	0	0	10.4586093397379	0	2.60478408842719	0	0	3.46926161248431
ENSMUSG00000004567	Mcoln1	2.05986081736056	0	0.457892127282739	0.104995326807622	2.27004957424617	7.50358565333932	8.53668381571885	0	0	1.22531227521766	0	10.9160413744573	0	0	0	0	5.15700597847386	1.98689479672345	0	0	12.7450753675366	0	0.0829931048807683	9.73394410768591	2.80636191740358	0	0	0	0	2.99179462900209	5.94168290816892	0.0641490624888273	2.71166639814164	0	6.46159411322214	4.91600123266813	7.66678128691446	14.9379415943374	11.7797870407966	0	0.208700055947312	0	0	0	0.309596245919637	22.9000080153165	0.631959345817245	0.79523728651491
ENSMUSG00000004568	Arhgef18	1.97733552195787	0	0	0	0	0	9.27591585390264	0	0	0	0	0	0	0	0	0	3.05802209161641	0.0425734995015335	0	0	10.270037954437	0	0	0	0	0	0.986351104503849	6.44716077530513	10.2896106370466	3.51385842764061	0	13.04705583863	0.18302536901096	0	0	0	0	0.19412646559039	0.520299717364446	10.8732734566931	0	0	0	0	0	0	11.3271216297219	6.01159603059073
ENSMUSG00000004591	Pkn2	2.17535507146744	0	3.76106626564381	21.3756444691279	12.6133971188128	22.8924334842812	0.630701874931676	4.44773228143201	37.4884999263171	10.8134062034903	15.1738181089441	8.69630068726235	23.4728736998185	16.309906652467	11.0063650713211	6.0246792347924	21.6016700253067	23.0368687195589	10.8700094997454	14.8889592306628	2.06494370148286	1.05050533968052	16.7015164424441	2.79660092224243	19.9638913929919	9.59268900606188	20.4853959715005	0.95123836970589	24.5651796876423	59.5909746710242	7.83633110284452	0.526912040028211	9.50591534028202	20.6851039147255	8.07785148029817	26.20439736384	2.66428217988135	18.8255523178076	26.6274299907626	2.26962615884997	14.2561385414281	4.36885746973351	8.09544354478008	2.21601961271682	3.48751984531481	15.6441320430457	4.8509558298448	30.886912457471
ENSMUSG00000004609	Cd33	0	0	0	0	0	0	0	0	0	0	0	0	0	0	0	0	0	0	0	0	0	0	0	0	0	0	0	0	0	0	0	0	0	0	0	0	0	0	0	0	0	0	0	0	0	0	0	0
ENSMUSG00000004610	Etfb	16.9348637473094	17.2826244975868	36.3240981651699	10.9036384059324	15.6005681019677	7.49267639584702	12.7232660879498	69.6056495286229	18.2296519599405	23.5274781997469	48.2052355915607	14.9343026965546	18.21729928301	22.1219120710793	3.39889116206197	4.45893257714418	10.3788540364341	19.037010958379	24.4638362314117	0.332081268729292	29.7662720475835	16.7616936695406	28.549556779066	3.25663140492999	0	0	19.3087792002806	6.85236757028045	0	24.026146176453	59.9188456859266	16.2381447740726	40.4804735114332	37.4299992872818	7.7426397344002	26.8490367800659	9.95232519289325	30.4517130672089	32.8344210598386	24.0763819061076	22.4472944318981	58.6421278927379	49.6197418915605	8.94999106417327	64.302395544271	81.9521114292658	32.8141089872803	17.8072689550597
ENSMUSG00000004612	Nkg7	0	0	0	0	0	0	0	0	0	0	0	0	0	0	35.6470140152927	0	0	0	0	0	0	0	0	0	0	0	0	0	0	0	0	0	18.4917699139137	0	0	0	0	0	11.9472541774467	0	0	0	0	0	29.1735184598693	0	0	0
ENSMUSG00000004626	Stxbp2	0	26.0517723093172	0	21.1708598310906	15.6051527042792	0.629103774327911	35.7241056465356	30.9007047314141	17.325620770535	26.1535230371281	11.7691275182334	0	36.467709994697	21.5408063019604	0.167870216793069	20.6895916115423	7.91552948260768	28.7882945385069	16.3937834239398	17.5658934348087	15.7898374724808	1.50117712383517	4.22129391836445	1.00259457823332	0	19.4801405610979	12.5146282066991	3.49314694846056	0	0	24.7086727793889	0.116529494374391	78.9368598697549	0	9.57078886139732	0	0.749917192295617	40.5561646401398	0.787674223480619	0.385050094991368	16.1393610744073	0.180356744851353	22.6939193323854	0	11.9227680509653	21.2268035015676	0	18.8517987449009
ENSMUSG00000004630	Pcp2	0	0	0	0	0	0	0	0	0	0	0	0	0	0	0	0	0	0	0	0	0	0	0	0	0	0	0	0	0	0	0	0	0	0	0	0	0	0	0	0	0	0	0	0	0	0	0	0
ENSMUSG00000004631	Sgce	8.24485669098972	7.71575736889111	0	0	4.72159422828955	0	0	0	0.0416574689058196	0	0	3.69525120500397	0	0.935209461259702	0	0	0	12.7644474398348	0	0	12.6802612461226	1.25020879884233	0	0	10.8949780257733	3.69745296217222	0	4.83182129841271	0	0	0	3.42522262841423	0	5.59853157279872	0	0.469491834417646	2.01533935884388	4.64551199383692	2.93266136513673	12.0348201817999	2.6319851705961	7.8459772808031	0	8.87797340389518	0	8.65409599824185	0	0.0566153194461001
ENSMUSG00000004633	Chn2	9.40137362956001	8.68356881972061	0	0	0.867891205489141	0	0	0	0	0	0	0	7.97717402667667	0	0	0	0.935382612574705	23.1218345916346	0	0	0	0	0	0	8.15095705247687	0	0	0	0	0	0	18.3451749419614	0	32.1148480558235	0	0	9.42939212317296	4.48641893635601	0	12.9502576080949	0	0	3.6357103613493	0	0	19.369358922957	0	0
ENSMUSG00000004637	Wwox	1.05383466633885	0.0693855076136904	0	0	1.71891314713949	0	0	0	0	0	0	0	0	0	0	0	0	0	0	0	0	0	1.63332763643138	0	0	0	2.61630077167812	0	0	0	0	13.101120215605	0	0	0	0	0	0	0	0	1.37278219946751	0	0	0	0	0	0	0
ENSMUSG00000004642	Slbp	94.0838151175403	76.2666691603602	15.4357308403838	154.574686921231	63.093805161129	119.425073571515	67.5406591929904	70.6963239647794	30.4122559400818	121.441526084337	146.251064311174	74.6525360783637	78.0210862018771	63.7019863911505	92.5380794189148	188.331462964075	130.681832014146	62.1163893846338	97.4949054614728	36.5803148717109	35.7396237150468	100.528671583934	37.5629852343994	58.582704066209	82.3843789502805	42.6929918194904	123.236722741045	57.8539471523156	138.763984690443	12.1059171875043	82.0005597154273	74.1007717641164	110.677081322587	47.505174375226	66.5623626080526	51.5101579488072	39.5253014174334	60.0807992122146	102.080989149602	105.228484285523	51.9372994610506	90.6148974898281	27.8219205005426	70.3723372153492	36.9558863134619	83.3749528095817	69.6732751884305	10.8274841689994
ENSMUSG00000004651	Tyr	0	0	0	0	0	0	0	0	0	0	0	0	0	0	0	0	0	0	0.0564250266974788	0	0	0	0	0	0	0	0	0	0	0	0	0	0	0	0	0	0	0	0	0	0	0	0	0	0	0	0	0
ENSMUSG00000004654	Ghrhr	0	0	0	0	0	0	0	0	0	0	0	0	0	0	0	0	0	0	0	0	0	0	0	0	0	0	0	0	0	0	0	0	0	0	0	0	0	0	0	0	0	0	0	0	0	0	0	0
ENSMUSG00000004655	Aqp1	0	0	0	0	0	0	0	0	0	0	0	0	0	0	0	0	0	0	0	0	0	0	0	0	0	0	0	0	0	0	0	0	0	0	0	0	0	0	0	0	0	0	0	0	0	0	0	0
ENSMUSG00000004661	Arid3b	2.51479552980949	1.54871219366804	10.1202044263405	11.4371319976971	9.40198062558964	6.83415506266137	5.86990167755125	17.9518081080742	10.4198825583461	0	21.7036206042159	7.65352096742912	11.7608936797162	24.3140643094418	0	4.21260026747932	4.24106833946164	9.63414914591341	4.52560407208013	7.75411427885449	9.69828760608911	0.587079581685415	0	0	44.2761889748523	0	0	3.75007327536035	9.05054840050972	16.0426296112596	30.7450273334196	6.19783212694524	19.2640167107198	18.0633364277281	2.40113081532584	3.63435568293247	34.5229198757722	15.01784583493	2.53279991081302	14.1048131884534	4.40553288326378	22.3827333296331	0	0	0	0	15.6135463102247	22.6355230533582
ENSMUSG00000004665	Cnn2	0	0	3.90625002441406	0	11.2092970806731	0	14.3709841037457	6.81421161070791	54.4499695888833	38.885401276064	0	0	0.292199756999085	46.1221633225841	0	0	5.52484120354084	0.145286393624136	37.9874381769932	3.7711472858624	0	2.74946285753375	28.6743707640642	12.6357298511284	0	5.61209007721214	0	0.115797849184182	22.4204249332587	14.3273857987749	6.18311492716476	0	0	0	57.5489009039189	0	0	3.97485775275932	33.0700966953203	0	52.8323222060094	96.3547844635863	0	0	0.95081286094425	0	29.5977260484356	0.244228361773177
ENSMUSG00000004667	Polr2e	82.3769457361726	34.3676554172395	91.9908713614598	34.4628481302112	32.1165253435015	34.7879071942911	120.239706658488	82.663788041509	35.9284591858416	83.2110942855678	85.7007575143613	57.0820502022792	37.4212677559053	72.23073565418	28.5021622655502	58.2145158439547	53.16538826079	92.6306867394152	84.8704253624003	123.780494481186	137.010409033863	103.56943796015	102.740879017309	95.5488335933639	187.850686616221	39.7326684827816	102.563759037706	31.2602148820129	202.013511502081	70.7375303250214	28.4840125858152	181.33390297228	216.567566959335	258.674175360497	128.548118646527	98.3896309556429	118.648575899441	127.567625780504	79.1378062385412	86.968683533715	166.446557755563	100.013826911571	116.074024879792	249.884450071351	129.30200245596	88.0980908375908	184.630059008348	67.9558556286623
ENSMUSG00000004668	Abca13	0	0	0	0	0	0	0	0	0	0	0	0	0	0	0	0	0	0	0	0	0	0	0	0	0	0	0	0	0	0	0	0	0	0	0	0	0	0	0	0	0	0	0	0	0	0	0	0
ENSMUSG00000004677	Myo9b	0	0	0	0	1.1663889705076	0	0	0	4.89484151312304	18.6272611760468	8.0163274110401	0	13.4729191584303	0.0357828420306612	0	0.0728837488035138	2.57865231556228	12.4919939192406	0.160513242969189	0	0	0	0	0	0	0	0	0	6.11348574430603	0	8.4135235134846	0	0	0	5.61072826004028	0	0	0	4.80727161819835	0	0.420685411601372	0	2.25514926575903	0	6.73991357779265	0	0.0530777843477554	12.8640186871536
ENSMUSG00000004698	Hdac9	0	0	0	0	0	0	0	0	0	0.0263019497649432	0	0	0	0	0	0	0	0	0	0	0	0	0	0	0	0	0	0	0	0	0	0	0	0	0	0	0	0	0	0	0	0	0	0	0	0	0	0
ENSMUSG00000004707	Ly9	0	0	0	0	0	0	0	0	0	0	0	0	0	0	0	0	0	0	0	0	0	0	0	0	0	0	0	0	0	0	0	0	0	0	0	0	0	0	0	0	0	0	0	0	0	0	0	0
ENSMUSG00000004709	Cd244	0	0	0	0	0	0	0	0	0	0	0	0	0	0	0	0	0	0	0	0	0	0	0	0	0	0	0	0	0	0	0	0	0	0	0	0	0	0	0	0	0	0	0	0	0	0	0	0
ENSMUSG00000004730	Adgre1	0	0	0	0	0	0	0	0	0	0	0	0	0	0	0	0	0	0	0	0	0	0	0	0	0	0	0	0	0	0	0	0	0	0	0	0	0	0	0	0	0	0	0	0	0	0	0	0
ENSMUSG00000004748	Mtfp1	0	22.134236425775	0	0	0	17.8142907956957	0	0	0	0	0	0	0	0.154331521209342	0	0	0	0	31.8455318686213	0	0	43.1074498828342	0	0	53.1805230130677	0	0	0	7.00021728861136	0	0	0	0	0	40.1877750540991	24.4968747046221	21.2780835959946	0	0	0	31.1043022722067	0	0	0	0	0.340908225002199	0	0
ENSMUSG00000004768	Rab23	25.0865991646766	9.24389576723197	6.40238386620681	9.47866381522353	10.2689879109606	0	36.4430286022859	11.7182232858854	2.56117258676775	10.568256750725	21.6626761147319	16.4927722516481	0	5.95702906826529	3.00560968761755	9.52874302462277	8.42096496298294	0	0.145227190017748	15.6763201599398	0	3.35970295418056	9.38438147427899	0	19.7529793249776	6.79696962310132	7.99557515732993	2.33804033935183	12.3842025541921	6.10373477024769	0	13.2202816856124	23.4291986203587	9.91986363949873	0.407925436821447	0.710695292795531	0.0537788706398391	6.1469963738357	0	0.0483229735989468	20.9886150238893	2.17290148993153	0	8.47397018077795	9.42940107502998	0	0	6.01889522110407
ENSMUSG00000004771	Rab11a	52.2440308286681	74.5492550098553	100.333180774141	71.5824590202299	144.312207068024	150.556216752727	19.6396352892008	33.1486798107799	74.0229274980974	60.5907432661629	0.931031828611609	49.7228145494542	71.3526024260265	110.357250780054	10.1894565892548	152.196370417598	74.7995546367086	110.613834632365	115.280553876499	33.3315474514142	39.1841450575398	47.211506271036	124.794848376116	29.0131898653917	34.8776437692439	202.418477610761	0	45.0334429658189	79.2929024493074	178.618670969164	60.2605719505763	41.6290324015689	58.3718592625702	19.8568238805281	37.6522086014448	60.7037307390272	46.3130081387306	141.345250870597	117.154167517975	80.0176437459325	19.4230358122585	39.861794315524	9.88738237574431	19.9829723760186	62.0710465411346	64.5569884316665	45.6115566559076	189.356974957948
ENSMUSG00000004788	Eif2b2	13.3927985698392	26.9611837478479	138.660478320209	25.6698256424014	15.3421678876056	17.8130928383814	89.2115747015231	90.7808430100278	29.5494438003174	33.353872259083	33.3559880659748	22.9478444543888	0	23.905747951612	36.9148536270681	24.9257007791395	14.9009510232369	16.1163845659452	42.979287073033	21.3264880993598	100.881056030589	15.870700722226	31.101170737129	86.0704356968107	67.3109302182683	68.8070605557622	0.627542063077667	13.1475096458348	27.7535405223916	1.01618524579017	0.590430072620508	8.74162847825203	45.918330223014	99.0193617508999	71.7169706963541	26.1907384039337	29.0735421856134	94.4529527270407	55.0334260067745	6.15932055795807	33.0999554060552	98.289450585509	65.0176880620373	35.0823960652719	25.0651420085102	2.51458247237697	39.6815710538491	53.705622407745
ENSMUSG00000004789	Dlst	0	5.79662238339729	14.1139895222537	0.248950631038263	2.9550610569407	7.75526103781886	5.94736230824002	0	13.735172175801	28.6090729314521	5.78669264773101	0.549794467175132	24.9655178926972	1.73973714817804	0.0243460693811199	1.62889345741055	2.71724240104404	10.5063994619333	0.503486669859625	2.70931624496914	9.35663070145992	13.9881497725864	16.0377294542309	7.41567574692228	0	8.62759080975439	6.5586975428156	24.793992455513	4.62438596641599	17.0730602410705	13.5059566564704	3.4476346231834	16.5560509680136	5.43834762205487	20.4278035465606	6.15975572843496	25.1235203904514	4.56054528751834	8.45344161048004	0	9.61405706595479	0	0	4.8805920605933	8.4663026961116	1.11569964546174	0	6.88228829488865
ENSMUSG00000004791	Pgf	0	0	0	0	0	0	0	0	0	0	0	0	0	0	0	0	0	0	0	0	16.6537939084927	0	0	0	0	0	0	0	0	5.54263767889824	0	0	0	0	0	23.871350767749	0	0	0	0	0	0	0	0	24.3326865536584	0	0	0
ENSMUSG00000004798	Ulk2	0	0	0	0	0	40.9297946895909	0	0	0	0	0	0	0	0	0	0	0	0	0	21.600339188807	0.269622239230128	0	0	13.445414397386	0	1.45882813133945	0	0	0	26.0229791017459	0	0	15.0813475668436	0	0	0	9.31817682890804	1.77229310876754	0	0.0669827398807553	0	0	0	0	0	0	33.816045559169	0
ENSMUSG00000004814	Ccl24	0	0	0	0	0	0	0	0	0	0	0	0	0	0	0	0	0	0	0	0	0	0	0	0	0	0	0	0	0	0	0	0	0	0	0	0	0	0	0	0	0	0	0	0	0	0	0	0
ENSMUSG00000004815	Dgkq	0	0	0	0	0	0	0	0	0	0	0	0	10.5986936479457	0	0	0	0.798229016100211	0	0.055789273858072	0	0	0	2.92181560676532	0	0	0	0	0	0	0	0	0	0	0	0	0	0	0	0	0	0	0	0	0	0	0	0	0
ENSMUSG00000004821	Tmed11	0	0	0	0	0	0	0	0	0	0	0	0	0	0	0	0	0	0	0	0	0	0	0	0	0	0	0	0	0	0	0	0	0	0	0	0	0	0	0	0	0	0	0	0	0	0	0	0
ENSMUSG00000004837	Grap	0	0	0	0	0	0	0	0	0	0	0	0	0	0	0	0	0	0	0	0	0	0	0	0	0	0	0	0	0	0	0	0	0	0	0	0	0	0	0	0	0	0	0	0	0	0	0	0
ENSMUSG00000004842	Pou1f1	0	0	0	0	0	0	0	0	0	0	0	0	0	0	0	0	0	0	0	0	0	0	0	0	0	0	0	0	0	0	0	0	0	0	0	0	0	0	0	0	0	0	0	0	0	0	0	0
ENSMUSG00000004843	Chmp2b	51.5542991439194	129.996296676253	0	76.3892414818229	0	70.2273312331534	0	57.001362086308	0	130.951082818827	204.171097390579	91.4992002041713	40.6726799949107	52.6824670153009	0	100.914727562607	107.138233625719	0	0	0	0	74.3059194882573	4.60537227940792	137.563087225832	45.6008761591571	0	112.628094699535	128.482690835293	105.468417039462	75.6615707680255	108.995061828149	87.5421803472394	0	0	60.0665397022919	125.184570788147	26.4231859708195	117.92654693034	39.8055468617238	65.5642582788083	0.367650145192432	55.9108852838078	0	13.5539203275861	0	0	0	20.2664362011126
ENSMUSG00000004846	Plod3	11.9382890124403	0	0	0.175534342560652	0.0744144528480178	0.192995692072714	0.422870652981278	0	0	0	1.67316717961979	0	3.18128524991259	0.178066951003653	0	1.99481159261204	0	0	0.355006939380995	0	0.178306276153848	0.575661619276987	0.069375183378425	0	0.146617505850188	26.9326203551701	0	2.14324675940805	0	5.17132376575273	0	14.4782546047615	0.113336134310467	0.547794654519252	0	0	0.197193159217113	3.96694146159427	0	22.2370690203775	11.2149972371712	0	0	0.100231771156544	0.103518461514621	8.26010294056004	14.2631364413068	11.6996140200614
ENSMUSG00000004849	Ap1s1	0	0	0	9.38318109409519	6.57870483806564	12.3005338975316	0	12.7107677906744	16.0898656971268	0	14.8461635876047	14.714034609721	0.163514877665548	16.4744334946988	18.6348669652803	0.124280386949759	0	22.6020152119367	18.6119413813009	0.52758316214863	28.9606546374885	0	8.55795596962063	0	0.150719860995678	14.3802921115481	0	26.4385771767924	37.4548781083429	16.2094954061188	24.4736578099788	0	25.1655718937636	0	13.4967807745015	0	9.52739915050052	10.565562520699	8.19729482484414	9.47156664508566	4.91895153312968	66.2056952485601	19.8681591515021	24.9347735380468	20.8573216120509	29.9214435627727	20.8167303089804	7.38018552728589
ENSMUSG00000004864	Mapk13	0	0	0	0	6.4497939551492	0	0	0	0	0	25.0034473700457	0	0	0	0	0	0	18.6739138471657	14.32389606306	0	0	0	0	0	0	0	0	0	0	0	0	0	0	0	0	0	0	0	0	0	0	0	0	0	0	0	0	0
ENSMUSG00000004865	Srpk1	23.2654924625461	27.548028040967	20.9180964301058	83.9533251379961	41.8997877815975	38.8294148645897	29.0198547155055	51.5498251632075	12.7850386387444	25.989090976146	33.2484068822577	32.3515055350273	20.9004455604933	17.572324266682	27.5495901501535	45.2496038399378	42.0774471759669	69.465480521543	7.31710996151752	42.8734921298807	43.1406832167115	54.4444552432689	18.198778279753	32.4963675346216	14.2856243245461	10.7331877189348	23.420452646436	39.3321372840046	30.9824136218031	42.2138751358616	35.0335919890977	18.3368768521435	38.066032498231	33.2562176918126	34.215854238321	47.7017188988522	74.8215888946541	57.1414129052601	41.3156780982482	12.6161681585209	31.0073599390132	51.1628729976781	64.251611159748	75.4521021858887	24.4883345527323	56.7501409173559	54.7706834159001	22.1089072599269
ENSMUSG00000004872	Pax3	0	0	0	0	0	0	0	0	0	0	0	0	0	0	0	0	0	0	0	0	0	0	0	0	0	0	0	0	0	0	0	0	0	0	0	0	0	2.37065219131758	0	0	7.49973811615323	0	0	0	0	0	0	0
ENSMUSG00000004880	Lbr	60.7250564784846	65.1596154075436	27.6110587737033	47.1511937431083	97.3308845442187	89.2114783272634	63.8188289121532	56.6276585544336	29.3412776662517	33.7027361508093	27.6667336852751	69.11872172533	93.0786031227142	56.6203160640928	33.9725338508332	65.810550141012	52.6529009750038	43.6152133903029	39.7615228669189	106.845212642298	101.715060538853	14.2064243426445	66.9682972904396	28.1059397444758	2.71371727037839	74.8595081734983	3.22997652924138	49.0626803978852	39.3535424854318	35.9686035360878	62.3376426179182	43.1610953269713	28.184727920319	61.9780924212732	28.8678004464058	23.0223569902292	48.8513434944459	38.9366579383139	38.7617005623501	51.7157822525465	20.15442497262	93.2706136289379	18.6408620467719	84.1011296973485	29.9682793348654	11.5736946103771	44.3750344362489	54.0103250459446
ENSMUSG00000004885	Crabp2	13.6029067189153	179.134354753473	78.2124626673453	259.813001146503	70.7152327177107	29.3574623261788	118.169716571279	76.0800025522305	41.7992681570119	9.92013250552068	144.490022798665	128.741959515717	266.971557102053	44.0283781376842	21.3007665226242	135.137717093179	50.7182094146532	234.124297671039	47.934127218591	42.3968808896596	34.1322991441734	25.7780140948687	90.1153195167163	55.3410558532778	190.199115840841	43.6960130743044	102.901233527732	92.4403193328551	51.2300823789787	41.4399113356989	37.603815442061	103.748007027364	62.374224313759	85.012840837573	128.960048647321	1.02783262553433	146.272426150502	182.446572191706	106.141683501281	35.7352410586523	24.8759912158595	0	208.856617728279	275.46875081737	28.3086189158591	109.80494046005	0.300961476150359	143.156246246622
ENSMUSG00000004891	Nes	2.74894247794787	0.0550076970818323	7.18905864842289	0	0	3.87409673871305	0	2.39495747851408	11.2997702376377	0.961890506989757	0	0	7.394256943013	20.0251402851964	11.0993715130178	6.00323082336274	0	6.51750776385579	3.56311379623499	11.7480994975335	0	3.77075407962409	0.732948379879448	7.73977841566933	20.2404369937114	19.1960329398145	3.41084173857168	0	10.7454499173582	14.6887549976733	4.16319458936281	0.0755371208078383	5.10888769026436	0.15433192292846	3.80434410266469	0	1.87501004797051	0.825514020503708	3.99961147876213	61.8380040119808	5.96820263751181	0	10.539026743223	0	7.58279184364018	0	8.43367607855756	2.99651755592027
ENSMUSG00000004892	Bcan	0	0	0	0	0	0	0.117553671310433	0	0	21.1651414386184	0	0	0	0	0	0	0	1.93476860800645	0	0	3.17230733046944	0	0	0	0	0	0	0.981318387279336	0	0	0	0	0	7.55315013355782	0	0	0	0	0	0	0	0	0	0	0	0	1.86012558020293	0
ENSMUSG00000004894	Hapln2	0	0	0	0	0	0	0	0	0	0	0	0	0	0	0	0	0	0	0	0	0	0	0	0	0	0	0	0	0	0	0	0	0	0	0	0	0	0	0	0	0	0	0	0	0	0	0	0
ENSMUSG00000004895	Prcc	0.494275003181166	1.00885007473188	0	3.40121831647654	1.12146373841894	2.07753104448927	7.28328720656464	0.332756879512892	2.94853112929957	0	0	2.11860367314098	0	0.127788558295301	0.110873786190627	0	0.28777956404024	0	0	0.184155596379655	1.72746416328088	3.47020562221799	0.448079733711914	0.361192849484374	0	0.692346811260593	0.281781035946022	1.62856241444357	0	0.730065436232291	5.30233771743524	0	0.976019039445455	0	5.90380890657814	2.58941349396166	18.6798947146707	0.388206688573444	0.780356621118602	4.19620219050978	0	3.2162617039214	0	4.74742364213495	0	0.282276557910349	18.5761624602839	12.8804571930875
ENSMUSG00000004896	Rrnad1	0	1.66948620850064	0	0	4.66612177435777	7.08224502089949	13.634594726776	0	0	10.5217959857143	0	4.9083323509083	3.17356027469205	7.78208543528508	0.330261225942467	0	0	0	0	0	0	0	0	0	6.42505791542504	0	0.0932605478477926	0.0898337145988922	1.72654365860074	0.0604071014920995	3.15882881804065	0	0	11.1634884345464	0.0592112940899416	10.4269962535284	0	0	4.73500841611674	0	0.0355167122287233	0	0.444249944710651	0	8.40889179196486	0	1.19198208103827	0
ENSMUSG00000004897	Hdgf	34.546662894927	25.1829181405473	166.031805771427	82.278255767982	46.8192011723206	20.1871948867711	155.31061756771	72.4469521925071	82.4744226158395	42.4249625769976	148.348077401499	81.6134697261429	187.271261594147	78.703918898548	145.563928560314	51.0586049449568	55.6112221202447	72.2770730773519	64.9137231956286	117.590751689517	123.262855629062	113.002636344443	73.002372960902	88.4017299017334	147.364678458317	145.424760734544	63.4073043824629	107.976153878688	105.021289822709	103.209475235322	104.465157871416	200.234946171726	22.1053194840502	151.13118735736	205.077544221645	69.3664788978775	86.2270158188629	100.827600374771	33.2572799457467	134.334502666778	80.98856233556	107.045777150393	17.1615315397534	181.462731398796	177.317828450957	158.384561156051	137.516872248687	87.9349614580672
ENSMUSG00000004902	Slc25a18	0	0	0	0	0	0	0	0	0	0	0	0	0	0	0	0	0	0	0	0	0	0	0	0	0	0	0	0	0	0	0	0	0	0	0	0	0	0	0	0	0	0	0	0	0	0	0.208200456028663	0
ENSMUSG00000004929	Thop1	0	0	0	18.0317384490279	12.2972126502739	0.258592863948387	31.7295924864759	2.48511967221903	24.1176241486226	25.0080123746489	38.544239214156	2.55714157518614	21.4549361009844	0	13.5705876216974	9.93535589145381	18.3877432215362	4.23883607410999	35.4374151265583	17.6499979958504	70.3990115392652	3.59950662237378	15.6164511423502	18.8824110841135	40.5344367495556	14.0038056722187	4.91030886873482	10.4169996370273	0	6.9668648082598	51.6257708091401	8.33449625182227	39.2805701696408	54.1191016487919	41.8644331478124	5.10320219177134	50.7296650153419	17.7980757549675	15.0014909490798	19.7843366409999	23.2415355276304	15.8650120768008	60.9821960573961	23.0995102698076	0	22.4866003262174	11.3250512535662	15.6761877119956
ENSMUSG00000004931	Apba3	0	0	0	0	6.05069323385814	0	0	0	0	31.8984859167444	1.92778355100757	1.39885156021482	0	0	12.1596317160321	4.82061689145123	0	0	7.63280274640566	0	0	0	10.4140552089833	0	0	0	0	2.8584839310725	15.1553493188178	0	0	19.2852281027181	0	10.6214540286432	0	0	1.07920609091954	1.1278143104715	4.91201640610457	45.1612465823984	0	0	3.41211627084509	0	0	0	13.2164784986832	5.92486174530014
ENSMUSG00000004933	Matk	0	0	0	0	0	0	0	0	0	0	0	0	0	0	0	0	5.5881792466521	0	0	0	0	0	0	0	0	0	0	0	0	0	0	0	0	0	0	0	0	0	0	0	0	0	0	0	0	0	0	0
ENSMUSG00000004934	Pias4	7.20669452766348	0	2.39259135460187	10.0899230363963	0	0.826120802075258	1.292931313141	0	3.2302745929015	28.0806947492498	3.6617825579355	19.3654814234557	33.6547693054589	8.13032654736826	1.00773619362003	4.36182114760991	5.63997321238323	0.87053876991566	0	4.4983306258291	4.36138599155203	15.2775919913466	0.4242306545157	4.8217534749908	26.6281000208781	17.4034346657625	25.4511190034266	1.61897615395259	0	1.76257949668991	0	9.05022612452321	9.70273866479843	34.8376644861082	4.3700338744497	8.7031507350386	22.3080431668329	9.48264440881553	7.97927844630664	4.65908009729169	20.2996609802083	17.2554302181668	6.48123999175022	0	49.6285714785256	18.4404132425412	12.9213879774	1.54468655335295
ENSMUSG00000004936	Map2k1	35.0824959890868	221.998931610003	1.81362431095178	154.624428709784	73.7810412387565	0	164.411791884381	33.7796806770864	0.651826983232907	91.4530660617887	59.1467415649741	84.8831872138849	0	0	27.7264898833697	0.161113707175211	43.1082075466684	86.3209403392188	93.9100139410054	34.4252032538693	3.20785663113527	0	24.4074620387482	62.1539291998882	98.7692006097476	0	115.291654005283	9.07259586294704	23.4405781866793	26.6623514268485	0	134.774796690715	9.21324843641674	53.8751761811886	57.9168175119222	0	34.4252967065112	111.858076732952	28.9820444894358	66.3521026193477	28.1641767374624	147.100843916679	0	8.28155033296907	70.3562262070573	51.7191254898058	39.8927054851263	88.410522916852
ENSMUSG00000004937	Sgta	73.4703586642108	22.7023421864575	8.15259914692036	25.9264712235636	15.6680717191606	55.9496591592252	32.3918405563602	18.6999878781336	0	85.1637653850267	70.8449921705463	24.4585012367742	15.3709670502057	0	36.9801471790178	49.1057045189671	35.0751856473288	11.1844254340694	25.5200429162445	28.2245985146691	10.0860842245523	34.552867718006	24.9627878631246	37.0372749113394	26.838930907914	116.471101547529	31.6705816221863	10.5981605918847	13.960029985084	38.7630857996879	90.6828190639116	11.4589497089743	97.5893473713677	133.242326139076	64.5013579264584	34.8045474665461	79.7852367087272	62.04841405081	65.4959607053943	24.6394238592864	86.0731713703287	68.8551381380075	168.007574796375	60.0045025866817	29.4408160267063	121.342702916099	110.396771569429	101.21295464068
ENSMUSG00000004939	Nmrk2	0	0	0	0	0	0	0	0	0	0	0	0	0	0	0	0	0	0	0	0	0	0	0	0	0	0	0	0	0	0	0	0	0	0	0	0	0	0	0	0	0	0	0	0	0	0	0	0
ENSMUSG00000004945	Tmem242	36.8983330445916	0	0	29.3632548688883	60.2263267208728	35.1327802957365	48.632024212546	80.2255642953649	0	38.8447725971884	0.433260320585727	58.3184794442309	42.6513025812382	42.7821763045826	55.3622328484337	1.18962783022567	2.46617843598448	32.2967619490213	125.757101635836	22.9358427062045	35.7484670920239	14.3028252917138	12.6290024893008	2.47624537093425	0	71.5938236764598	31.5530335635104	20.9343852553439	62.2558246529676	11.4701149000867	72.702930009123	22.9527580500647	39.0327919068374	51.7466452263821	0.204419176438982	58.6813910302337	28.8630349738035	70.9718749540041	52.6075908088998	14.1661019909487	35.068393489932	83.2994856694082	45.2445715329183	88.0251564870672	4.32912290089151	22.2549788561316	20.7923913234591	46.7690000569233
ENSMUSG00000004947	Dtx2	0	6.32382002902539	0	0	1.67374316477627	0	0.0679377304046643	0	0	0	1.24500729494821	8.85342541793528	0	9.49784098145582	0	0	0	0	0	0	7.44806513453504	0	0	0	0	2.11826913503539	12.1117759955775	3.32177789212644	0	4.14046354698237	0	0	0	0	5.87414433774532	0	6.58959415502147	0	5.12447497867105	17.4785611112135	0	0.106670037235037	0	0	0.399146695891272	0	0	0
ENSMUSG00000004948	Zp3	0	0	0	0	0	0	0	0	0	0	0	0	0	0	0	0	0	0	0	0	0	0	0	0	0	0	0	0	0	0	0	0	0	0	0	0	0	0	0	0	0	0	0	0	0	0	0	0
ENSMUSG00000004951	Hspb1	10.3983123769788	0	0	0	8.80652825930669	0	7.4139766472256	0	0	0	11.5795229231229	0	0	0	0	0	2.63649066163152	4.50655564316184	0	0	16.8030750064923	10.5974223099451	0	0	0	0	0	0	0	0	0	0	0	0	1.09268097124659	0	51.8593144424132	0	6.35487312406575	0	0	0	0	0	0	26.4354323690357	0	0
ENSMUSG00000004952	Rasa4	0	0	0	0	0	0	0	0	0	0	0	0	0	0	0	0	0	0	0	0	0	0	0	0	0	0	0	0	0	0	0	0	0	0	0	0	0	0	0	0	0	3.50749893978454	0	0	0	0	0	0
ENSMUSG00000004961	Syt5	0	0	0	0	0	0	0	0	0	0	0	0	0	0	0	0	0	0	0	0	0	0	0	0	0	0	0	0	0	2.89740885627399	0	0	0	21.2184346609071	0	0	0	0	0	0	0	0	0	0	0	0	6.68690876421469	0
ENSMUSG00000004980	Hnrnpa2b1	307.799298178857	396.295100157766	310.115433286946	234.333415080716	246.182314378088	557.742585888927	271.738952030676	387.206397153113	404.200446745431	450.219250764388	255.185788277891	458.485709209578	185.707502304434	402.708930357572	398.995957410851	199.772982811736	382.760282522506	341.607942996453	379.383094025008	491.045303712439	565.590500493953	162.509406272019	272.699188983298	346.887632228349	188.23312788072	323.9652302014	288.901913206782	271.536810698757	278.042875158445	294.89066119009	281.339242083843	295.174837497478	232.746148985331	210.70189218258	427.191680303294	449.010389274619	187.656770448847	316.210680354118	262.545991398678	293.94290894836	210.433509881458	252.351108682938	290.55849155711	236.724166682859	234.46837196675	144.255025451288	348.318477514815	392.473938731261
ENSMUSG00000004988	Fxyd4	0	0	0	0	0	0	0	0	0	0	9.55729760323227	0	0	0	0	0	0	0	0	0	0	0	0	0	18.959434083021	0	0	0	0	0	0	0	0	0	0	12.0349729193888	0	0	0	0	0	0	0	0	0	0	0	0
ENSMUSG00000004994	Ccdc130	0	0	0	15.3112338862815	0	0	0	8.03717794841291	0	0	0	0	0	0	0	9.12588943815934	0	0	0	0	0	0	0	0	0	0	0	0	0	0	22.8596231160212	0	25.0949928750068	0	0	0	0	0	0	0	26.5881746427436	0	0	0	27.7832176739166	34.529422317539	0	12.2658119331517
ENSMUSG00000004996	Mri1	6.86795091750916	6.14634125120411	18.7901009423694	0	11.7127393876877	2.26497220472076	0	15.1513672462349	0.1350654017808	9.78142430312865	18.6025937922617	0	13.9457757533844	18.1932956973198	11.3766734965659	0	7.38220965377898	0	10.048171512614	1.88960633938721	18.5870264822525	0	19.7318452366462	14.9405055068337	0	9.10215005045454	0	3.22026282699182	0	16.9721254082248	39.104943169053	0	6.88521344386071	0	0	0	0	8.21567757330179	3.83677325570249	0	8.25836806432863	45.1483132483487	44.7621520826329	0	34.7312503522917	0	5.59183296292564	10.0959661924567
ENSMUSG00000005034	Prkacb	22.6294032141189	9.2939680590738	0	1.17557182198023	3.56520050787482	20.9287569067856	0	9.63443450772969	0	0	0	1.33649964958509	0.122915766453103	20.7928824699098	0	1.4324830555992	5.3023023801728	0	0	13.9246991095626	0.0918565962083034	0	17.6195487537325	24.8479639685322	14.7664570790223	0	0	0.811852225812492	20.9430349383104	23.0158080766468	0	0	0.525478102888854	4.1201626811535	0	0	0	6.73464698476805	0	14.833065069182	14.0458393705137	0	0	24.1138193788131	0.533287651145202	0	0	0
ENSMUSG00000005043	Sgsh	0	0	0	0	0	0	0	0	0	0	0	0	0	0	0	0	0	0	0	0	0	0	0	0	0	0	0	0	0	0	0	0	0	0	0	0	0	0	0	0	0	32.4580441891311	0	0	0	0	0	0
ENSMUSG00000005045	Chd5	0	0	0	0	0	0	0	0	0	0	0	0	0	0	0	0	0	0	0	0	0	0	0	0	0	0	0	0	0	0	0	0	0	0	0	0	0	0	0	0	0	0	0	0	0	0	0	0
ENSMUSG00000005054	Cstb	55.6306652695937	76.0875953267243	184.219528514556	43.4111275340668	132.727000258716	66.531984235362	80.8114233183601	99.6140553041297	51.3181330049735	19.8296200537142	199.964726618194	151.516734334778	154.967632318918	145.901897689357	117.32689796533	129.109391039697	54.0939676048177	18.9667411377976	135.685065194359	85.8983548446436	94.206479878468	35.807202848019	52.5110312145893	126.985941787459	287.331043262066	74.1078037689993	87.296512613785	87.3956901554248	69.9449018988989	81.3217831191551	119.97088664648	42.5974243059101	129.103201698588	125.621578340694	63.5204622986365	187.782577522993	72.4124020540706	124.321421587132	145.778295292537	114.197684640085	239.441658241916	293.572924765307	144.843163565511	126.194293213729	135.762831388557	142.474762492213	111.509471108724	182.332875461109
ENSMUSG00000005057	Sh2b2	10.2993464237292	0	0	3.66833006858854	0	2.01661934072464	0.441859156682944	0	0	7.77714986496768	0	0	0	0	0	0	0.446947321435786	9.78465967271094	0	10.8683822999882	0	1.20302203917532	0	0	0	0	4.59512626099324	0	0	0	0	0.358598717797329	0	10.8067745899058	0	0	0	0	1.11096645856501	0	0	0	0	0	0	8.00081208637237	0	0
ENSMUSG00000005069	Pex5	0.0877067572641194	1.34261749103615	40.5528787723497	0	6.9933732737651	11.0594411929571	5.33108731652203	0.354276789296252	0	0	0	17.3272404393741	0	22.8568779552567	0	5.26522700461154	0	0	0.610300415570397	0	0	0.923657316895203	0	0	0.336071270066955	0	0	21.0955899127521	0.102852123151632	14.8654783571958	0	0.122913052777857	0	3.7669044541301	0.0952366287391351	7.4665362678303	8.24898043553839	6.19968936836667	20.0782347975782	32.1868628193573	0	26.6331519800023	0	23.8937493690428	0	0	0	0.0761858698912014
ENSMUSG00000005078	Jkamp	45.862000211588	10.2260371430939	63.2533900684392	21.805251618996	45.2202697979605	0	53.0622949262534	0	21.5122759523555	25.7909572045025	9.01743160175982	0	0.80105282565128	28.8953095542098	20.6616101241367	61.5947817024334	0	18.0560980129609	0	28.5742855733203	59.4147709119385	0	21.0790000435979	13.940608342441	25.7199075720344	10.5267834911968	52.7303174844607	17.6716465088579	40.9764081246778	28.0353127858805	0.413432647433008	0	112.060092373314	34.5758544003885	22.4585447125052	60.4020936618796	0	33.1447323198606	16.631181390997	29.7441185934082	40.4976012830641	20.3408507556036	24.5949773439232	22.5464145976079	55.0863956331014	53.2632376682857	0.147797574840555	7.92290595603696
ENSMUSG00000005087	Cd44	18.6795977368103	0	55.1376184083645	0	2.5806528107807	27.7372776341065	17.1325801667592	21.1309949040732	0.130480832357898	54.3056465482526	0	0	37.1817291141265	0	0.240417435138559	30.7596525477243	11.9900577791916	0	0.177568959459421	0	26.9341813797576	0	8.28182632969175	19.5242165792966	4.54681960826012	0	0	0	0.0598503426190798	7.57609891482112	0	0	0	0.0730662350582202	13.9655464630814	0	0	5.47158879705763	0.241730895473428	9.33533384448485	0	0	0	0	0	0	0	0.0443330703927106
ENSMUSG00000005089	Slc1a2	0	0	0	0	0	0	0	0	0	0	0	0	0	0	0	0	0	0	0	0	0	0	0	0.028864074890265	0	0	0	0	0	0	0	0	0	0	0	0	0	0	0	3.07895678542562	0	0	0	0	0	0	0	0
ENSMUSG00000005102	Eif2ak4	0	0	13.8657470358362	0	0.360765897728516	6.6665427586383	0	0	4.38689961675114	0	0	0	0	4.49624822083004	0	0	0	7.42895291523172	5.27085567883017	8.34562935294948	0	0	8.82879915170866	0	0	1.656498006317	23.4774956091468	0	0	10.8400815001838	0	0.129984220759847	4.53305020821164	2.32377474941766	0	3.88730332936428	0.119500588239524	2.24008846801274	0	11.7041132233158	16.3113013323675	0	0	0	4.32857650574432	0	0.480198423392379	0
ENSMUSG00000005103	Wdr1	0.155445665307303	0.158637772548393	0.129579167008319	6.06138882954802	5.40374024902658	6.71335048596996	6.60319010959532	19.7002617389019	21.6588504520116	1.43035139667327	24.4162809342693	8.63141242514844	48.1415435129541	0.301413848591793	9.91149851265912	9.4238302267985	3.02058591627831	12.4904830100103	9.32928436695085	22.0223729158394	0.135818529375082	12.1023233061047	14.8668078948148	28.7956625891542	3.38764862980487	11.3495784919767	33.0323431893469	16.1333638984735	2.09631558523393	14.0773458720942	17.0923280377855	10.1841592592738	0.287766036042815	13.9087765129368	12.3639489769293	8.04171133427381	14.1192650856052	4.07468702658129	4.17207406246022	16.4659215725163	33.4111726508623	41.6396481298313	15.1968525866994	17.8654374900105	15.0343610843002	0	4.56038310934026	1.95788867613197
ENSMUSG00000005107	Slc2a9	0	0	0	0	0	0	0	0	0	0	0	0	0	0	0	0	0	0	0	0	0	0	0	0	0	0	0	0	0	0	0	0	0	0	0	0	0	0	0	0	0	0	0	0	0	0	0	0
ENSMUSG00000005124	Wisp1	0	0	0	0	0	0	0	0	0	0	0	0	0	0	0	0	0	0	0	0	0	0	0	0	0	0	0	0	0	0	0	0	0	0	14.6995095791186	0	0	0	0	0	0	0	0	0	0	0	0	0
ENSMUSG00000005125	Ndrg1	0	0	0	0	0	0	0	0	0	0	0	0	0	0	0	0	0	0	0	0	0	0	0	1.55239514324495	0	0	0	0	0	0	0	1.10263802617114	0	0	0	0	0	0	0	0	0	0	0	0.0687012549456122	0	0	0	0
ENSMUSG00000005131	4930550C14Rik	0	0	0	0	0	0	0	0	0	0	0	0.342696892542032	0	0	0	0	0	0	0	0	0	0	0	0	0	0	0	0	0	0	0	0	0	0	0	0	0	0	0	0	0	0	0	0	0	0	0	0
ENSMUSG00000005142	Man2b1	0	0	0	2.5696775535536	1.59215034537345	2.98829518354178	3.39285732017433	16.4475846534312	14.045304050247	0	0.0991651144923974	0	0	8.55549651988914	0.347955261222216	0	12.8320964975005	0	0	8.76535666804923	0	0	6.28887852524589	0	0	0	4.3478750651123	0.851819712912297	0	13.2696624558042	13.959387301299	9.23883174268289	0	0	18.8554404346772	18.1714387975726	13.8785803404893	3.55340199053677	4.14968358715029	0	11.4784473563938	8.78516670479158	4.91453577011828	14.3344920208735	1.86513801179994	22.4420062915976	0	0.711140893924637
ENSMUSG00000005148	Klf5	28.325825590881	0.067857985863687	24.0188186465606	10.218623245552	10.5390237885967	23.7279130639181	0	112.805925722352	105.906181271983	34.6337914963374	2.67799195462982	0	14.9953926438427	31.3044621426908	100.723302789655	5.30474857567247	100.229677013336	0	18.5073219657303	11.8170107462685	18.8234140599149	50.5177659313177	49.6088850960364	59.4736909739708	24.7776960177364	66.5007032737867	83.470575183006	0	32.9052833896684	86.4759771998151	69.4040087382962	18.7298364906213	4.1359299403688	8.47214304540482	7.14791091803933	0	14.8205199350961	9.94860811315986	28.4489826593779	31.5604485425077	0	7.49959478860075	70.1514310404664	11.7569497155579	42.9033965502481	25.2902645456544	43.6044050640918	40.9506301579569
ENSMUSG00000005150	Wdr83	0	0	32.053983521842	0	0	2.63067921435452	10.8499785994174	21.06771421515	13.0204868638645	0.273753082542862	0	29.1222230245291	16.4525675809243	15.9908924374693	0	6.59171176545732	0.750238668283047	0	20.2100109108327	7.40713279888162	24.3045121592744	0	11.9039001222569	32.9569249133405	0	29.5236900386303	3.14828811808393	1.31412889173532	0	6.6614584973321	30.410920117283	0	0	0.175690847677253	26.651385884912	0	10.9096870419885	1.8795237599545	5.42502003032677	19.3216443336939	45.6408909485648	0	10.4978878879443	0	33.8648634589257	0.841019865228989	19.9076724901984	2.02541405771438
ENSMUSG00000005161	Prdx2	145.247652434818	43.6243862124074	110.523566264543	85.3057769319213	131.975691202285	105.229603918487	178.407776693173	187.323794262231	149.723717708033	155.172491961524	146.13231376818	140.764827264922	96.8627823972114	142.380796613873	57.0746261495625	69.6803049249551	63.474689254757	78.0430871665701	160.690632030708	214.055883933349	161.021119590808	82.4776448267143	172.171577024884	117.947288151352	140.224718202897	80.5235661328792	111.116609842705	83.030474850772	155.304143086387	193.3094190699	132.825472140274	147.300654722808	261.456540297573	159.72959338178	154.023951450863	141.968061507574	149.298432131997	164.304980714469	172.747502574587	102.517346926145	251.611964383016	180.024888440827	217.542789073144	180.881934871187	293.256872636623	239.719063244727	135.797962426582	159.754175553834
ENSMUSG00000005198	Polr2a	12.233895001147	12.1355370635234	1.79487407376218	3.25512255934852	4.94877697632659	2.15969744139527	34.4090424769563	24.2142194812371	14.5750800886733	17.1381747979494	12.7262785633941	22.9964308140141	0	18.9775140697493	1.44896835961816	25.0091812598802	10.5988557818222	5.86655232553889	36.8890488676513	20.8941944216701	37.7399980899798	2.09821206846221	42.277012928231	30.3600810629913	40.3614010325993	9.25366040153097	7.44867653970742	9.35165536810475	5.91074429368178	11.0046233261027	13.4388913656786	43.2732038265247	14.204688584407	5.39443247121784	15.5159564056284	34.2887213368078	5.10686195038014	10.0313553163241	13.9838831724333	9.9706561741956	20.2712728137968	11.1448830752599	49.2363087512857	26.0218811073591	23.9625829610322	53.8253903812868	8.50127802350175	43.1026598798275
ENSMUSG00000005202	Shbg	0	0	0	0	0	0	0	0	0	0	0	0	0	0	0	0	0	0	0	0	0	0	0	0	0	0	0	0	0	0	0	0	0	0	0	0	0	0	0	0	0	0	0	0	0	0	0	0
ENSMUSG00000005204	Senp3	27.1368136038933	9.23135779882116	15.5570279056015	12.23056796965	8.98101720945999	4.20225270328755	0	24.4229073905259	25.6818754587075	10.9385913023673	11.1758974820251	13.0229536909537	25.3325604305815	0	2.75526853529939	14.0645568079327	21.9533337691358	32.5718333899749	18.662080443392	25.5424623436715	30.8374126127627	8.52335815099151	25.6364032888407	43.7310364065758	13.1345387234207	15.3045912304451	23.4498922909969	3.99999949301967	25.2349609798007	31.9603129988593	0	41.7660380790934	8.03784732491551	3.5441952168549	36.3938176061895	31.6752809896219	22.0816161302842	16.9385630144087	30.3661569971591	41.8874498297258	6.94594239066936	1.03263174812332	3.10289994422351	25.4408767254157	32.4574839623656	37.3574216319728	20.3755559728976	3.72192726435719
ENSMUSG00000005220	Corin	0	0	0	0	0	0	0	0	0	0	0	0	0	0	0	0	0	0	0	0	0	0	0	0	0	0	0	0	0	0	0	0	0	0	0	0	0	0	0	0	0	0	0	0	0	0	0	0
ENSMUSG00000005225	Plekha8	0.0493687000560204	24.3851280637952	0	31.7069399470155	6.96080546765566	33.1802023419004	0	30.4110336159537	18.8060784994304	17.4550514742351	0	0	0	9.49615840081877	22.259119448032	0	29.7066360521199	0.25510672970405	0	0	30.5972551714257	0	0	0	0	0	0	5.28653135890098	0	0	0	7.67961806544512	15.0615551942176	20.0724473499326	0	20.690664473283	15.7742141222362	14.7730794565437	0	0	7.68508641829274	38.0138207212072	5.22864110515551	0	0	0	0	3.25916734597524
ENSMUSG00000005232	G6pc2	0	0	0	0	0	0	0	0	0	0	0	0	0	0	0	0	0	0	0	0	0	0	0	0	0	0	0	0	0	0	0	0	0	0	0	0	0	0	0	0	0	0	0	0	0	0	0	0
ENSMUSG00000005233	Spc25	52.0694219160486	238.127699501288	335.544426501168	56.2334287487887	161.072113947815	107.924153563995	67.8843690254506	27.605251867093	268.181167533008	243.79609724132	104.355667919348	156.863124471731	77.1121391337736	265.704079245822	0	76.346595624019	41.9689212797625	105.831202863774	42.6481873998009	88.9969466912979	150.512449775664	220.728581856081	197.662475505356	107.728713097136	123.243649247065	91.3970543744088	71.2421654545386	335.34810127072	136.496478626953	207.173013842795	56.3229791357794	34.2049521951679	155.352733139174	96.9072800071543	237.938022201753	70.468651877286	108.594266595382	87.670051093247	21.0654675209679	132.991477605723	24.5878143526311	34.5875922741551	0.441880983273988	3.55197125044245	155.101795312701	72.6684164259864	89.7331557049833	146.431297133151
ENSMUSG00000005237	Dnah2	0	0	0	0	0	0	0	0	0	0	0	0	0	0	0	0.784756580182355	0	0	0	0	0	0	0	0	0	0	0	0	0	0	0	0	0	0	0	0	0	0	0	0	0	0	0	0	0	0	0	0
ENSMUSG00000005251	Ripk4	0	0	0	15.0500827352312	0	0	30.0927882446735	0	0	0	0	0	0	0	0	10.296502728768	0	0	0	0	0	0	0	0	30.0860939423708	0	0	0	0	0	0	0	0	0	0	0	0	0	0	0	0	16.6984886824277	0	0	0	0	0	0
ENSMUSG00000005262	Ufd1	43.3879826285696	32.2324806856334	0.0886473714027546	44.2721415949363	29.5484929963315	64.9685546563514	25.1209159148701	46.3919572758527	0.101953196501051	6.84969861262055	12.4818141619665	33.0052831456037	24.203520462129	35.4462060315573	41.810898558534	35.2170374534602	27.5137771498597	17.4745756464159	5.36485406051877	50.2790647130317	0	18.1787062229324	34.5609051804509	51.6677791191203	36.8261177707143	25.4718479519223	0	29.8264921316563	0	6.00805464969485	15.4863072207125	70.9756264092395	27.9943126971664	35.282498594359	39.9247717946464	18.5935933356577	7.3985636333203	11.745356309324	5.28864383491496	0.184665976138042	8.57143754093703	25.6031706346502	29.8897428206475	31.4430718475052	27.6191839164322	51.9256061163405	0	9.97641315435079
ENSMUSG00000005267	Zfp287	3.30783874530226	0	0	0	0	0	0	0	0	3.63884993681974	0	0	13.6566631710657	5.55294196150029	0	0	0	0	0	0	0	0	0	0.0496687494148127	0	0.0476033790892291	0	0	0	0	7.43723729446705	0.0635018562766104	4.0264621929953	0	0	0	0	2.98947634969058	0	28.2221488354027	0	0	0	0	0	0	0	0
ENSMUSG00000005268	Prlr	0	0	0	0	0	0	0	0	0	0	0	0	0	0	0	0	0	0	0	0	0	0	0	0	0	0	0	0	0	0	0	0	0	0	0	0	0	0	0	0	0	0	0	0	0	0	0	0
ENSMUSG00000005299	Letm1	14.8365477690635	18.9813834760188	28.0016193459946	2.95923616426291	16.4131987305607	11.2520588386877	8.66364466694092	15.4890913658941	2.93185697842774	23.2629979587858	16.454082091061	1.13111282117681	16.6853631188369	17.5946570346676	13.9634446328475	1.9532240461735	2.7855123387524	9.8147357516657	11.4709915829355	5.72804055362986	12.483111529525	14.6919284698904	0.324877154079899	7.85641234267048	9.9213027504038	0	10.0517281543953	18.4791767699143	13.8684097537484	3.37447214521721	30.793834549175	17.3267282539447	21.4419751651189	10.9793489195298	16.4605311369002	6.99345129231435	8.77264344224899	6.24855876780921	10.5237357470604	19.0428320048372	10.9472370797606	32.491538587334	25.692654626242	48.3926157975099	16.8698833989047	15.4111007521771	10.4312312002182	5.41655481727412
ENSMUSG00000005312	Ubqln1	53.5303044336433	86.9907652160829	0	35.827212690033	18.012215917196	4.2558265883447	39.2512935802149	41.6918087824917	67.223393150053	17.2461335407784	86.7974511766067	26.24164250068	13.0515007211575	62.1563721568169	19.8074282694728	93.1847345993875	5.48387930023118	38.5309012596011	11.560547980082	63.2540200393659	1.73735306137602	44.754254698017	66.9563261279082	40.6087005655873	168.347927316154	48.0728871331922	0	31.4861868542064	27.889335960242	49.6484678405613	73.5911363550885	47.5186437105164	24.7597267526413	22.9232294566314	125.712458011724	27.1388870458832	23.7644386436679	37.2654191153213	27.2622999319222	1.54472292704123	52.145240293612	18.2163177704347	100.394236143606	48.2143255421383	36.9483374488041	74.6338322185364	0	20.1812668984063
ENSMUSG00000005320	Fgfr4	0	0	0	0	0	0	0	0	0	0	0	0	0	0	0	0	0	0	0	0	0	0	0	0	0	0	0	0	0	0	0	0	0	0	0	0	0	0	0	0	0	0	0	0	0	0	0	0
ENSMUSG00000005338	Cadm3	0	0.486933477479355	0	0	0	1.86510578827086	0	0	0	3.13981339747112	0	0	0	0	0	0.075377563608049	0	0	7.52557894703813	0	0	0	0	0	0	0	0	0	0	0.634274565667045	0	0	0	0	0	7.87381052706511	0	0	0	0	0	0	0	0	0	0	0	0
ENSMUSG00000005339	Fcer1a	0	0	0	0	0	0	0	0	0	0	0	0	0	0	0	0	0	0	0	0	0	0	0	0	0	0	0	0	0	0	0	0	0	0	0	0	0	0	0	0	0	0	0	0	0	0	0	0
ENSMUSG00000005354	Txn2	24.6550197641936	19.2064707807132	15.2544261884961	26.3910544592257	30.8468774225747	8.60126487589796	42.8011576324883	2.65572885968654	58.2001566672578	38.1318267143544	38.3953278065457	23.3453299712943	88.228633375824	55.9658615567235	37.6628081232936	13.8271972147852	23.8289412112161	34.6532907682206	49.9430140297566	47.2155168145581	59.3601423957138	39.5652449811818	39.6353216163352	41.6186349184028	62.5090565703397	65.0986164124485	13.915014508227	16.585400119607	17.5402466085582	0	96.5377021660468	46.6448901323079	16.7963181442401	78.8295774395235	68.981804886533	58.2309845886724	57.4947631143844	35.630141262852	9.08252521712264	0.285424788213361	52.8859375207007	68.6287845074049	14.7299261610763	33.3682713629968	148.966706977977	70.823845772831	31.2018663463297	26.1280237412188
ENSMUSG00000005355	Casp14	0	0	0	0	0	0	0	0	0	0	0	0	0	0	0	0	0	0	0	0	0	0	0	0	0	0	0	0	0	0	0	0	0	0	0	0	0	0	0	0	0	0	0	0	0	0	0	0
ENSMUSG00000005357	Slc1a6	0	0	0	0	0	0	0	0	0	0	0	0	0	0	0	0	0	0	0	0	0	0	0	0	0	0	0	0	0	0	0	0	0	0	0	0	0	0	0	0	0	0	0	0	0	0	0	0
ENSMUSG00000005360	Slc1a3	43.8310435623288	1.69498708721547	0	11.5218135246476	11.0688033723877	5.87425127297694	1.06325691506459	0	0	0	23.8201063462614	5.54051397511348	0	0.0942584692029413	0	19.3908848603063	0	28.133517983827	0	0	0	0	0	0	0	1.19159560710459	0	11.0448116055654	0	1.52576578195366	0	2.27080317255753	0	0.11598847575366	0	10.6640795331003	0	4.24746864818401	0	0	0	6.5020117062108	0	0	0	0	0	0.17594054409102
ENSMUSG00000005362	Crbn	27.7870759558363	0.101096930529085	5.67038459573781	0	0	0	38.4544290397518	15.50569850546	0	0	0	0	0.0514760385432361	30.8105132422219	0.266656060972931	0	1.60053167302042	0	0.861649433756114	18.4357898502862	29.1400645430618	0	9.16002815127025	30.5125186608456	0	0	1.69423773832913	21.7053797170327	0	57.1744650307557	28.3739619401832	28.251359210965	0	5.81465745028201	18.1789019143544	24.3267461142291	15.060394529827	21.0655505580746	0	0.344046837239136	0	66.5016028984483	0	11.8069925582739	30.1503820414003	58.0448253533106	5.98345209172605	0.602350671689215
ENSMUSG00000005364	Il5ra	0	0	0	0	0	0	0	0	0	0	0	0	0	0	0	0	0	0	0	0	0	0	0	0	0	0	0	0	0	0	0	0	0	0	0	0	0	0	0	0	0	0	0	0	0	0	0	0
ENSMUSG00000005370	Msh6	41.4603078009252	52.9311112591324	21.5951164960414	66.5694806697875	38.8926245676386	106.404459180854	88.7195850875467	0	3.74106397767468	46.8773517248696	50.1412759730802	12.8293826097276	16.390386933503	79.1317279611202	9.13608859773364	205.42204075207	38.3388134293666	83.596028602209	64.487836718318	43.1611973390752	0.378827485631987	46.1087635769765	18.2768219356844	51.059754617042	21.3378791077502	28.6957734777205	45.1866427354203	3.61602874603355	137.183963602146	3.51221712949057	46.3079552372988	28.595718839416	64.7732259357225	14.3152109724503	56.8485212656925	139.478224224483	61.0625954196925	48.2701343459206	44.2798267486398	47.8093006167784	80.3772753251122	47.2561805576532	67.2236635306834	66.2278482695566	56.7430095518662	64.9046306288391	43.1167287136876	33.1189504128097
ENSMUSG00000005371	Fbxo11	5.09061109494155	49.8223189959137	7.69863059830949	0	0	0	0	0	87.4750553145312	0.465393452344224	49.8397308672049	68.4836406450924	0.0867291749780102	2.71852889049159	0	45.2204264704828	0	93.4047066036558	73.9422742714718	76.9540642762402	16.0414334242247	0	37.3726322686845	25.7959156709812	9.59311547688709	2.80547482014669	67.652335658695	86.6136615181684	77.4099478704696	116.668561566258	28.6476367281765	7.95268807022446	28.4262012351039	0.238946336271477	56.6358028351849	33.9917279060034	0	49.0598544665196	51.1206400030923	42.9918791358439	0	0	19.7165929853508	5.3557966503293	0.564430414556674	0	54.4384405221836	89.2358806495222
ENSMUSG00000005373	Mlxipl	0	0	0	0	0	0	0	0	0	0	0	0	0	0	0	0	0	0	0	1.81475397559106	0	0	0	0	0	0	0	0	0	0.415061579266408	0	0	0	0	0	0	0	0	0	0	0	0	0	0	0	0	0	0
ENSMUSG00000005374	Tbl2	0	3.05527665747148	4.40404203898293	0	0	0	0.243278482599923	0	1.46324577476034	0	0	0	0	0	0	0	0	4.36802478908668	13.173243177536	0	0	0	0	3.08855522777421	0	0	0	8.26845291539451	0	0	17.3331878671124	0	0	0	0	0	8.67859520272606	0.570547691436808	0	0.0509682796011807	0	0	0	16.0304735750586	11.732219698811	18.8573677611019	0	0
ENSMUSG00000005378	Bud23	84.5674459370721	66.4999844348344	6.92465302614972	12.6506035078871	45.0887850675627	12.2347926144826	76.4719613560056	16.7085032185181	53.6592981901173	99.7900324079545	51.2421817908104	25.7891050782192	54.5583373803785	60.7593080395832	24.2621379966291	32.5930269841377	29.3461638096327	52.354591271242	19.7810212613315	54.9105106500978	16.6578925976806	18.6693387588773	59.5347459305395	39.4073559444523	90.6965888636445	31.7600297713712	13.1008209048442	26.6690722831685	47.1899270836482	7.58057386988008	49.9616138237531	131.53863779319	0	56.2942325370592	14.4174080110435	32.7726628356283	58.819964746966	66.9011055315279	31.1210799085936	71.8890574277917	52.3536267889077	79.0865391481778	87.3687184531216	102.468307257537	46.8352555969196	68.4190524412418	76.4955899372339	29.5432648253619
ENSMUSG00000005397	Nid1	0	0	0	0	0	0	0	0	0	0	0	0	0	0.231797364708486	0	0	0	0	0	0	15.4932693747498	0	0	0	0	0	0	0	0	25.9337265881551	2.7785278082607	0	0	0	0	0	0	0	0	0	0	0	0	0	0	0	0	0
ENSMUSG00000005410	Mcm5	68.6805411737268	70.1792965877202	55.832081490949	76.2845085169368	43.8771132909893	65.8533636468052	172.047938105598	97.6055179249784	38.6381422364054	75.829878097363	101.854369084915	62.0626961815621	55.4455076090826	67.4432999241884	98.7897097114807	68.2749696805756	31.7681828282739	92.8195581925977	79.1491216467206	153.726432186282	62.8590353854426	58.7647433377525	34.0750816178819	175.438232643766	30.614363110162	156.67870759276	76.2837648740573	96.4523873174691	74.4465716311512	69.0792194132943	230.322192403327	125.986156136491	217.79560546742	145.689644449421	117.649148992019	4.08353037101842	86.3666035753383	98.3610554846351	159.708428395212	44.7179321250199	269.585614879504	137.133909927585	63.8561733074437	313.535322148547	122.778443302938	111.733375100308	130.032994808255	32.1992433688633
ENSMUSG00000005413	Hmox1	0	0	0	0	0	0	0	33.5067743964564	0	0	0	0	0	0	0	0	0	20.0032231724195	0	0	0	0	10.742654038393	0	0	0	44.9251664545649	0	0	0	0	13.8391252742173	0	0	0	0	0	0	0	0	0	0	0	0	0	57.5241257333808	21.8136052890887	0
ENSMUSG00000005417	Mprip	1.79050906644985	5.6407262619951	0.576836500941463	8.27345370078715	2.82608525482566	11.6159816173629	1.50559023400879	0	9.81859696619292	13.660909434904	1.43329939326057	3.24579326153845	4.47672742433204	5.95749549209152	5.37848096210329	1.22984148202402	2.42489966333345	20.03310442347	3.79190405271071	1.82728172870537	28.7492880957535	2.49854507212145	0	3.83992690756133	21.6264396629096	6.59719182025791	2.44092531663454	1.15424223648433	19.1711510917489	2.90337552367017	39.4453688832857	15.0917805468434	3.15131772025349	11.3307215930159	6.17081473241778	0	1.03641451495333	6.66453038833998	6.55498781012159	13.7587583860142	17.577614505346	0	9.19624386560668	6.049721058486	26.2560475600855	28.2311506234845	10.2400973598316	3.5389013988158
ENSMUSG00000005442	Cic	0	0	0	1.38705211701657	3.10340943072841	2.45699227140288	0	2.37477988667327	0	0.786873903182508	1.89426176592593	0.824716351169979	0	0	3.73027712651357	0	1.87775187074557	0	0	1.87751407033659	0	3.10835464808687	3.41098919884938	0	0	0.81174536155109	0	0	0	0.0744320648266747	5.91041877630671	5.69673462400174	0	1.63525271980309	0	0	0	0.237472072852825	1.43206886822921	0	3.74171703042844	0	3.83175287458415	0	0	0	0.154603097521187	3.53103818561316
ENSMUSG00000005447	Pafah1b3	17.8904718007945	9.88269277842674	111.463277867979	23.7181303863265	10.2144520146618	17.385000647374	38.9990302208653	34.8068117988818	40.2834644164609	52.5396738386	17.5649327074481	75.2126699352714	83.2415672240772	59.5779734443947	25.0727885750386	12.316557949207	20.068083219949	16.2842120162676	24.1745488373238	67.6954049451973	40.7280899841143	0	29.4609766635246	25.3674120884067	4.40242198629237	76.213845861593	38.4574276410755	17.8461687646357	61.5921665438079	34.5464400360465	21.8331158320388	40.7130382426421	71.4650219928841	15.0385361937769	11.049889739602	105.547890033156	76.3390685873921	23.97742858926	15.8070054439811	4.56029429065714	46.2894856275871	56.6048830527042	61.5101684244555	27.7314718687605	21.7581361667242	64.1146923931047	20.3939609486681	108.070180738303
ENSMUSG00000005465	Il27ra	0	0	0	0	0	0	0	0	0	0	0	0	0	0	0	0	0	0	0	0	0	0	0	0	0	0	0	0	0	0	0	0	0	0	0	0	0	0	0	0	0	0	0	0	0	0	0	0
ENSMUSG00000005469	Prkaca	23.2127143207535	0	12.3593248360882	5.73887238447288	0.810962007444194	1.75270806365875	20.9298452983964	2.8073018090738	39.2673883707039	31.9364659245964	0	12.6739999478949	6.06713804122698	8.30127417900379	23.104038212174	22.2882487840276	19.4228072321693	24.5643787547946	34.4971001647329	54.0662474625048	32.0622347797365	2.50940339952994	12.3487268735273	34.4333795782356	60.0515662239927	56.5114866655473	35.4209408252228	15.5712734819372	33.5781591024511	18.4775805946734	43.2420416931941	17.3366193216138	30.2606112015689	22.884297832302	13.5838514632865	93.9359701465021	3.76073826699052	8.67902521779139	16.019788851037	7.24116263345151	41.1021434828665	85.019792571532	125.697379251768	75.5519132437358	20.6824726825976	29.0533827960476	14.8721903725008	18.8354252640824
ENSMUSG00000005470	Asf1b	74.1059451198049	34.8702685261742	11.8370402792852	48.8565081011755	9.63673530032203	12.1235221580365	46.5886618506744	23.6005468424753	28.3620012849802	52.7928955761016	33.871672920077	45.3029266194807	0.461170702877084	47.9552527178134	46.8832507989106	41.0102951116189	0.129180775218235	0.152867634009997	33.1079274271925	6.77854853243659	28.9496788720684	70.0980051425579	87.0255297018518	37.4532112353805	89.2676733597756	0	0	25.5864708676426	57.9351316552693	19.8269128987213	36.6543938795995	32.5446741810031	0	47.4344247908503	13.6522807121749	0	52.9790882052167	23.6995368149978	69.5914780756955	42.8096488737462	50.0013632452602	31.7623038844487	100.622612476962	0	56.4241144477541	52.9650066151621	111.124811663993	0
ENSMUSG00000005474	Myl10	0	0	0	0	0	0	0	0	0	0	0	0	0	0	0	0	0	0	0	0	0	0	0	0	0	0	0	0	0	0	0	0	0	0	0	0	0	0	0	0	0	0	0	0	0	0	0	0
ENSMUSG00000005481	Ddx39	99.756712932693	122.755070100354	55.6989576711059	121.871161527258	50.4255284773635	30.9608144409732	147.908834112151	50.2672031088642	133.864171232702	129.445645279147	166.204752356557	85.8726615883185	179.458831164742	45.5285472122419	17.2455087285734	76.2009702737903	70.4235950062462	149.062994350738	85.5043510480081	102.653116395815	98.5519887590085	122.829170963839	132.213972903154	134.053940942427	167.98677268296	167.876239048657	78.478669603158	65.9798398715317	70.9607024774724	120.392818043432	162.572143012204	205.234254662667	103.526083912485	208.603349876775	167.253033998811	56.3199109306847	141.230199664839	138.389434009866	97.7591315585448	38.0551619342317	88.4383910075725	208.370223284242	177.899998082451	216.061608596109	133.851579667748	160.451580813799	75.8694982067451	62.0614825421479
ENSMUSG00000005483	Dnajb1	37.453878630047	74.242947920575	0	60.9041712645974	38.9386630798662	11.2965426335139	49.2052370998276	13.9516941842209	0	19.021054538657	37.3854029156851	93.7488136611262	88.2809883809876	33.0680813437658	65.3719318017206	14.067655410446	22.7178343454794	11.9357941728293	8.13654520435991	156.836883845557	37.4716427056636	54.4803173967236	0.684939193448726	39.6345458813483	7.85813088002686	78.5808768794739	45.0423995773942	63.1250072987178	36.3269911034444	75.926862333314	67.157428047857	52.3369456359767	42.6804992457502	102.140758610089	0	0	14.8797440473983	4.70494632563661	39.3644126638739	83.4699433915541	49.5627737868187	30.9031487648111	0	130.766641952931	63.8041723952739	12.944723674709	0.12417948547777	56.4423635326362
ENSMUSG00000005493	Msh4	0	0	0	0	0	0	0	0	0	0	0	0	0	0	0	0	0	0	0	0	0	0	0	0	0	0	0	0	0	0	0	0	0	0	0	0	0	0	0	0	0	0	0	0	0	0	0	0
ENSMUSG00000005501	Usp40	0	6.36230210412651	0.647586559518733	0	0.0283277661882059	0	0	0	0	3.18426191084858	0	0	0.0302759414631349	0.836024159960236	0	0	0	1.41504614866671	0.0675712391147636	0	0	0.0219140330006967	0	0	0	2.41777526303687	0	0	0	0.0968162339304763	0.031251528567929	3.96012789225843	0	0.0417064113178755	0	19.0009203385358	0	3.22616076554932	0.13798067119265	17.4361020428086	15.426316403004	0	0	16.0254314733129	0	0.998228447567724	0	0
ENSMUSG00000005503	Evx1	0	0	0	0	0	0	0	0	0	0	0	0	0	0	2.50762822163291	0	0	0	0	0	0	0	0	0	0	0	0	0	0	0	0	0	0	0	0	0	11.4603016338474	0	0	0	0	29.4618416084658	0	0	11.3819933718874	0	0	0
ENSMUSG00000005505	Kbtbd4	0	11.2433700056399	0	5.81220546757772	2.78536212899809	0	4.71802539865358	0	0	8.35579176317193	7.35300320438466	0	13.8541222791251	7.7759683757334	0.148279118964081	0.870239855098979	0	0	4.59970921680932	6.77280752597939	0	11.9338559885897	0	0.845333949900273	0	0	0	0.907495090771224	0	3.17319139191949	0	0	0	0	2.5122263681066	1.87579181293755	0	0	0	14.2847574584055	7.31927138367807	9.31954264786059	15.2584783494852	9.09069275341017	0	0	17.1113713439167	1.05269504134791
ENSMUSG00000005506	Celf1	48.6025967322171	47.8038380110975	51.2439323591095	55.7878733429744	28.1493240683254	37.2774401165108	29.1869370146921	30.1843111396649	26.2226615053644	25.5744887816268	20.3545144596083	47.6257116265183	26.6384050312758	7.01852103166776	55.63224152206	54.0450169845509	28.1784781125578	33.6415581352974	29.5364638686067	17.5742786137277	31.4826900828733	48.1720676906212	28.1361463290106	9.02124686269287	80.2121963518925	7.31263653392486	2.94118548033737	35.7174530930238	5.76195957736517	38.6004811568936	18.1408463053686	25.592255568077	31.3509137249153	24.6200165376379	0.311227349020704	22.4696105561103	41.0951501056809	41.7263586909807	16.9369231788113	46.121978296005	26.4290511548629	29.4854876876404	19.0141711476713	21.9341079691305	65.4122323558346	3.0866604052058	2.16695113517116	43.9611051191718
ENSMUSG00000005510	Ndufs3	36.0435711035721	30.1399749828874	37.5903927969234	37.1489663871541	14.3590169215234	11.4123988409472	24.1281878891717	21.4860414309167	20.4999885504519	15.0532772868438	65.045940857229	59.025370104161	37.9537700895506	23.5223062982602	12.2880022404152	41.8908214105603	37.0250607010478	37.7424433023581	19.5194322842801	18.6349736749743	5.17939617408141	46.9401303490584	34.1143386243541	7.13588049443888	47.4564111084354	77.8995858404965	0	43.5533893915051	5.95843410963284	43.0945593330621	53.4847957886979	38.0507321279286	41.6223050495746	54.7834393525411	60.8621963144163	24.7469502576996	33.5498175818067	24.8793610259373	34.8450609326882	11.21290450519	75.7028447726081	51.3156343313499	26.518539743699	70.9160029775205	66.3683092854144	31.2843557994443	85.6756347657452	27.3091713619097
ENSMUSG00000005514	Por	20.2972761896572	10.7959000971588	47.0312114354522	12.4282767281746	14.3844747416745	97.6041754823345	43.0095000035879	44.8151768329198	41.9971104031109	8.9211098426185	58.9848207552754	20.6105348632	131.302406100208	55.4333799525457	18.8679555264374	9.23921599356316	90.0590794080623	12.9771353230651	105.628491932816	27.7818479172989	80.2559830407024	39.5290842561617	192.111390670236	31.1101033390129	63.3563923616705	42.7369191484345	52.953250933164	15.3730932234519	150.176045074079	103.278386477637	149.280476779198	52.0684268064002	143.167016619418	49.4973680973163	38.1961882843645	84.1432200965278	0.110807745150725	10.740320687324	77.1256018494134	189.474547728581	23.415379602837	18.4681090479585	71.8196711785333	31.9913091706599	303.994332449263	51.8675628597228	86.9755463374311	125.957695120114
ENSMUSG00000005533	Igf1r	5.54032893258661	1.32419458174339	5.90606578642158	0.850355219615778	0.480655940568437	3.37618900666897	1.42260175155023	7.65386403299095	9.66228009233998	4.77811705121801	0.687305016335044	2.23911222582894	0.0428093265569501	3.27477682637583	5.41927902988047	0	13.4365085693403	8.08848316120791	1.07486802688676	4.62718491793104	1.63159109677411	0.495773184684691	0.616146326703256	2.28016565117735	0.177567761909148	4.88999056406606	0.528370908031714	0.475025659687121	7.6080617771347	5.04231469974985	0.861681194066199	2.10703175501909	1.79964227657621	1.09097623273876	0.134185466184888	1.88822645399215	3.90072167577314	0.121321815156283	2.56882685705651	2.88506081760111	0.496345577471196	6.52225242499969	3.85926760974116	0	1.56016889671467	6.45746081798878	13.6249101361262	3.25608725308459
ENSMUSG00000005534	Insr	0	0	0	0	13.0881142255786	2.03031580381573	0	0	0	0	0	0	0	3.20016165817992	0.0169303126156064	0	0	0	0	0.703009233233115	0	0	0	0	0	12.5014660189041	0	8.41366651034435	0	0	0	0	0	0	10.5175644144179	0.0329500637993205	0	0.0889181404753012	0	0	2.57265948391288	0.21827548431159	0	0	0	4.78447060606535	0	10.0964068719064
ENSMUSG00000005540	Fcer2a	0	0	0	0	0	0	0	0	0	0	0	0	0	0	0	0	0	0	0	0	0	0	0	0	0	0	0	0	0	0	0	0	0	0	0	0	0	0	0	0	0	0	0	0	0	0	0	0
ENSMUSG00000005547	Cyp2a5	0	0	0	0	0	0	0	0	0	0	0	0	0	0	0	0	0	0	0	0	0	0	0	0	0	0	0	0	0	0	0	0	0	0	0	0	0	0	0	0	0	0	0	0	0	0	0	0
ENSMUSG00000005553	Atp4a	0	0	0	0	0	0	0	0	0	0	0	0	0	0	0	0	0	0	0	0	0	0	0	0	0	0	0	0	0	0	0	27.7051119189483	0	0	0	0	0	0	0	0	0	0	0	0	0	0	0	0
ENSMUSG00000005566	Trim28	83.5043422000944	77.3253172820058	103.073142779849	52.4629427269567	54.8333580136822	87.6762069685465	216.349418072906	109.3543302678	124.179091417353	141.838134838894	121.930686887802	111.032749213607	118.591780163871	123.728152151756	79.3097684974544	65.8284336451661	59.9981632833458	62.232053511383	119.028200281589	140.282053528752	110.167870661966	102.167158785913	87.9899065543166	205.034317714197	170.262188022892	120.141861510911	43.1005034917177	53.5059585674846	134.694304403917	108.44417097865	214.669184917149	98.1414316259745	310.280454834184	255.168942078137	137.997004674586	138.885945323824	207.777020674319	109.645562072417	101.240480222723	169.366502163092	227.251351290138	266.992178623962	223.267008829354	261.877221440798	150.758033420713	206.619244306889	257.209581556864	165.010971932809
ENSMUSG00000005575	Ube2m	9.53704003097474	2.09631369651188	5.05542005705246	2.35582429283882	3.56681069601392	8.32554920692548	14.9989906216438	27.8552943865807	27.5707050590573	0.818239485156751	7.09116817447416	10.6341206007336	0.762421937015007	10.3558611503721	0.789899286259229	3.3610014530978	4.10046197654961	2.12289494968826	0	28.8635965366813	11.4523390220469	1.65554615454775	28.59732182551	18.4952346145069	7.87094028435979	6.93631926788495	1.50562170840229	6.28462489081058	8.43095042755934	14.3033354748981	13.5362210539542	26.5249705372502	0	20.7953262904945	6.21349302402121	15.5653193618253	6.23818927759237	19.8785047775352	12.0455896594333	38.048242394514	10.3210330110704	0.318245100482299	11.9534711470299	49.0036403620651	1.38930822787102	12.06615518141	2.02564822131917	22.303841693541
ENSMUSG00000005580	Adcy9	0	0	0	0	0	0	0	0	0	0	0	0	0	0	0	0	0	0	0	0	0	0	0	0	0	0	0	0	0	0	0	0	0	0	0	0	0	0	0	0	0	0	0	0	0	0	0	0
ENSMUSG00000005583	Mef2c	0	0	5.28316897988586	13.5782041167354	0	0	0	2.6222681969937	0	0	3.6718226310155	0	0	0	1.92517531262083	0	8.12958498190762	0	0	0	0.487100069260118	0	0	5.52386026581303	0	0	0	0	0	0	0	0	0	1.00815131276767	0	7.32068854943091	0	0	0	0	2.66598408816728	0	0	0	0	0	0	0
ENSMUSG00000005609	Ctr9	0	2.82343507581629	6.1500000384375	17.8478931157107	6.89371770461395	0.545092207797871	26.1561620812566	11.5245353866097	21.8824184714136	23.2877298831621	28.6026278204181	18.5457991288831	22.193302043473	10.3603136016634	19.0542838219065	6.89749933551813	9.89130736807261	0	0.25066818110355	1.69112386100392	3.12234349001454	17.5270326024918	19.4765884353112	18.3849869333918	9.64859566139508	16.7122135036138	10.720183399419	9.7209399443891	0	10.056423238651	4.73008291928104	17.2655197030476	15.557041975076	19.9895336534629	0	22.023797930918	0	1.62969167863132	15.2877064454608	25.923040398306	28.5782117236102	2.90665184461752	22.1872860511702	7.4170132468989	17.0162223658888	20.8855719506472	10.4938495100417	13.7057903772585
ENSMUSG00000005610	Eif4g2	195.808035987093	257.979368094517	170.484643501099	296.431005078299	301.678504945127	244.374606163641	154.93828273833	229.337835092038	304.873714328174	468.279825648662	234.088002622347	222.017392026002	253.521373465644	312.871316568332	409.36178917401	234.877437280798	242.695198302935	151.033823887748	343.745325509381	230.001590404153	254.268889110867	214.362111561911	231.290419304866	267.468296937272	358.427455921605	207.171179465331	309.285149016322	246.025436254112	258.821752828616	222.640729580207	151.409072395081	287.278949730791	139.251111448263	232.451019888376	175.569268433386	249.410876250699	298.733320991469	239.019308758538	380.194745536302	220.459568308499	193.673414366697	124.918902932291	269.105605746966	94.635079881078	186.503354957728	144.948235018577	174.82688139484	201.409839861356
ENSMUSG00000005611	Mrvi1	0	0	0	0	0	0	0	0	0	0	0	0	0	0	0	0	0	0	0	0	0	0	0	0	0	0	0	0	0	0	0	0	0	0	0	0	0	0	0	0	0	0	0	0	0	0	0	0
ENSMUSG00000005615	Pcyt1a	0	0	3.0076291267789	0	8.24470990284249	1.66816603325379	0.664563547495183	0	10.6846808109841	0	2.42188074352803	0	0	29.709851003302	2.34706946242728	0	0	0	0	0	0	0	3.70690990275134	0	0	0	0	1.23831815768165	0	12.0572826668378	0	6.6574590855754	0	27.4623338537099	0	10.002140545497	0	1.41687678545585	13.3862844276149	35.8517224269947	6.61915164898647	0	0	1.89023421536326	0	0	0	0.156703643704229
ENSMUSG00000005621	Zfp592	0.886498533992989	5.61868151218164	0	0	0	0.0588334816835263	0	0	1.31213158670106	5.46416618953099	0	2.78166124473911	0	1.33896961722719	0	0	5.13425609956682	0	0	0.782263754993719	18.6439395065541	7.4757334680276	0	0.664858964104163	2.77111437898638	0	0	0.730220112097768	0	0.361806916303328	0	0	0	12.490974532797	5.52232392821191	0	12.5636279195188	0	0	0	0	35.3192379844895	0	0	0	0	0	10.6996537553948
ENSMUSG00000005625	Psmd4	142.740154975541	42.7336149295557	171.107105770274	44.9163501962329	35.9272342329266	33.8547297150815	111.608335774527	62.9307487872802	29.2823522668489	47.3905777028126	112.667355962999	104.810248382022	120.953841719333	99.0572032281783	48.8156985324501	89.305018053167	29.7937424257423	55.4944353082275	171.254216035986	106.134024976314	118.655365602519	35.2969750965933	135.093592934969	78.9733115695523	183.337828861841	115.927654676375	155.236765210173	48.5930333360715	47.2270357403531	57.4379891937602	219.579850618543	89.749290204276	67.3038641952215	123.950518715959	115.677739835265	130.814639934191	97.7434804282967	212.126890505608	92.9426597594917	101.799881444029	165.887027477933	60.1044632882035	191.641642281622	151.627682131423	154.267355036792	202.985595527699	55.2598710376075	95.9613938133773
ENSMUSG00000005628	Tmod4	0	0	0	0	0	0	0	0	0	0	0	0	0	0	0	0	0	0	0	0	0	8.18150275513605	0	0	0	0	0	0	0	0	0	0	0	0	0	0	0	0	0	0	32.009473095465	0	0	0	0	0	0	0
ENSMUSG00000005640	Insrr	0	0	0	0	0	0	0	0	0	0	0	0	0	0	0	0	0	0	0	0	0	0	0	0	0	0	0	0	0	0	0	0	0	0	0	0	0	0	0	0	0	0	0	0	0	0	0	0
ENSMUSG00000005649	Cabp5	0	0	0	0	0	0	0	0	0	0	0	0	0	0	0	0	0	0	0	0	0	0	0	0	0	0	0	0	0	0	0	0	0	0	0	0	0	0	0	0	0	0	0	0	0	0	0	0
ENSMUSG00000005656	Snx6	188.371149358348	89.1152581884978	166.93003773444	315.126242692334	338.410099657012	145.745801791452	138.636479179077	61.5051921900454	127.253368513891	88.3883689456595	197.514680264673	193.234219010236	417.308620933953	8.3206207802371	237.148784486042	115.353921211712	193.424727392811	91.0797397041179	67.5583356676678	92.316377354717	30.6395367114987	115.753416274915	129.459969868123	145.913598214164	87.9588640950389	135.483472293415	143.031132747418	197.066463793083	130.267085553092	243.431954885862	134.510592244725	72.5837655201093	62.867606627496	16.6793788139441	173.730321418691	207.732127536693	228.575088966024	145.547013660285	235.114231167087	84.3978947701526	32.6074693816813	75.0604104573161	49.3379720951083	101.527897008511	62.8830456359514	74.7046134524166	89.5807115552944	144.288617202352
ENSMUSG00000005667	Mthfd2	4.85963850035237	8.19824495057067	0	20.2461522135965	6.84708998618689	9.754446161912	25.0720034406724	16.8254551098925	4.81750051077866	20.0215012583377	8.67340692251428	20.6365706798311	56.5855262141589	26.8458950868314	12.4804710177922	20.3681547272865	18.2756529019527	78.614646750184	7.01612115735774	38.1332530253824	0	6.26667186782527	31.8271536005834	22.7203975241109	21.4711182993637	59.1796690194178	18.9972297615367	20.5865794855916	25.5864934755132	12.5246944346344	65.856291481187	16.400415175843	17.4785640731091	15.9021630572136	52.0146851443051	36.7592877220777	31.5608867172393	23.1344244600661	50.4183034478921	23.1923943005418	43.2794616001025	4.73251546900176	0	13.3792886456012	41.051556593312	57.091911195321	84.320826445914	67.0237707241823
ENSMUSG00000005672	Kit	0	0.633696571836223	0	0.534108199325498	7.88713867083607	0	10.7224356459567	0	0	0	6.2521540370462	0.408305791506986	0	0	0	4.72089740089751	0	6.13656074876582	0.0450083144165278	0	0	0	0.0351819609120303	0	0	0	0	15.6640924033905	0	0	0	0	0	3.77809258167501	16.6035352580691	0	0	6.0809390993706	0	0	0	0	0	4.87969340031606	9.60693376141584	0	0	0
ENSMUSG00000005674	Tomm40l	0	1.51206357516939	0	0	0	0	2.97714115804853	0	0	0	0	0	0.069991373146811	0.8879998297276	0	0.585170632068406	1.88213999585734	0	0	0	0	0	3.35790748837208	0	0	0	0	0.721171415172373	0	0	3.03436214536615	0	0	1.34982576875618	0	0	1.04122596280678	0	2.02021437240058	0	2.58803745829002	0	0	8.55616266096842	5.0105152905845	4.96152585926278	0	0
ENSMUSG00000005677	Nr1i3	0	0	0	0	0	0	0	0	0	0	0	0	0	0	0	0	0	0	0	0	0	0	0	0	0	0	0	0	0	0	0	0	0	0	0	0	0	0	0	0	0	0	0	0.10261607926063	0	0	0	0
ENSMUSG00000005681	Apoa2	0	0	0	0	0	0	0	0	0	0	0	0	0	0	0	0	0	0	0	0	0	0	0	0	0	0	0	0	0	0	0	0	0	0	0	0	0	0	0	0	0	0	0	0	0	0	0	0
ENSMUSG00000005682	Pan2	10.6540416850711	0	0	0	1.46864019824683	1.38975350430052	0	7.1725368317384	0	5.73660053779089	0.0939446658304983	0	0	0	3.13155627979347	0	0	1.09685053543434	0.047340544117762	13.4596395250548	0.0475546542693129	0	8.77018762085024	0	0	7.41884503460297	13.5437828757597	0	3.30295899309432	4.92895423810854	0	0	0	18.4083445181383	4.29948638225753	0	6.836937278404	1.44271572116795	0	0	1.03690186133475	0	0	12.7244422778362	27.0564169636969	0	15.7795892368012	0
ENSMUSG00000005683	Cs	0	33.8944122486166	13.9010859148797	0	16.7004754913645	28.5987121308729	0	13.6573119884105	25.3965959386539	42.0492124555844	34.7749697614268	25.7433225699891	65.8609858927666	14.7133300370656	58.6743347466656	18.4822290347098	8.67556537608558	27.5830454453464	18.5300998386289	25.2165701668001	44.9661801307153	13.7295644841906	2.11572100602128	34.6340129506616	0	11.8818824987888	29.5780370299797	12.8161108043265	33.5440301987422	19.9539112539421	59.7019922020754	32.2873809196556	58.6699923876518	35.4680877010491	22.2230775695615	83.0779497498853	36.0825605539885	24.1817029663671	22.958202520499	10.5994883109349	43.4981207256087	33.2283349489904	19.2574164041392	32.0566665352615	0.242844745242034	0	22.1001235407715	54.6325194869421
ENSMUSG00000005686	Ampd3	0	0	0	0	0	0	0	0	0	0	0	0	0	0	0	0	0	0	0	0	0	0	0	0	0	0	0	0	0	0	0	0	0	0	0	0	0	0	0	0	0	0	0	0	0	0	0	0
ENSMUSG00000005687	Bcas2	178.506985799597	141.814905288723	71.3589127466766	162.442479483917	84.7974387355702	100.823433424116	72.9121960222669	150.192053633735	68.0725932982472	86.1056335847004	96.8132522918301	125.332320120213	125.505453257381	65.5601005202166	87.470325148817	140.255427522117	119.158701152875	56.1751992113002	136.034595594783	85.4972349643896	82.6873828937645	110.100883946665	68.9142887945453	61.1350574118374	38.7879450562208	88.5513937251996	88.5166663221208	112.712192601593	147.807169598865	85.4343278068278	49.1832285322536	64.4722919335319	84.2332222016355	39.246854088056	144.903767184188	106.681378269468	106.162553221097	101.53090526325	85.8161198126259	111.990197479775	73.4233351239135	63.5623182422054	83.7528533008704	71.8112465157333	51.0424066772232	137.124936440702	61.6292320273637	41.6729245907593
ENSMUSG00000005696	Sh2d1a	0	0	0	0	0	0	0	0	0	0	0	0	0	0	0	0	0	0	0	0	0	0	0	0	0	0	0	0	0	0	0	0	0	0	0	0	0	0	0	0	0	0	0	0	0	0	0	0
ENSMUSG00000005698	Ctcf	33.3730888653387	1.52500351317238	19.6932871601201	16.6482404920209	29.5454929225149	0	36.6659092256561	43.9769027098464	32.1091313148314	20.9525877843547	31.8523448835717	43.7541195626535	19.0056101203664	45.2014161693095	3.06467920611194	0	15.1012326230116	44.6387960262205	33.587473155274	9.30565510816972	0	26.8705814500283	13.6110826600779	53.4288577038452	23.8577755275669	19.0625086930646	70.220471933756	42.1432690876604	18.775274147541	82.9265706216801	49.770258426067	61.0295173389077	5.58534928401176	30.9690184899934	48.0601261044549	42.5904795642706	30.2539344182823	48.2033289718626	65.4962732047595	59.3119757432999	8.01805125290936	30.8684650961637	0	53.8690498125538	38.020776007388	0	28.162067610277	24.2298656198672
ENSMUSG00000005699	Pard6a	0	0	0	0	0	0	0	0	0	0	0	10.9883238551135	0	0	0	0	0	0	0	0	0	24.3368773016359	0	0	0	0	0	8.1029215579576	0	0	0	0	0	0	0	0	0	0.515073223334804	0	0	0	33.6645782745963	0	0	0	0	0	0
ENSMUSG00000005705	Agrp	0	0	0	0	0	0	0	0	0	0	0	0	0	0	0	0	0	0	0	0	0	0	0	0	0	0	0	0	0	0	0	0	0	0	0	0	0	0	0	0	0	0	0	0	0	0	0	0
ENSMUSG00000005716	Pvalb	0	0	0	0	0	0	0	0	0	0	0	0	0	0	0	0	0	0	0	0	0	0	0	0	0	0	0	0	0	0	0	0	0	0	0	0	0	0	0	0	0	0	0	0	0	0	0	0
ENSMUSG00000005718	Tfap4	11.9476693346649	10.0216578649419	0	10.8868675470497	1.27318092728894	9.0805706173616	0	11.5693252027518	5.85799038371965	14.6036192447853	0	0	34.1886161490221	4.56990753385051	0	2.06847735364369	3.43047404592786	0	0	0	0	3.57032801078412	2.81903578800518	8.43179322768149	0	0	8.67733564977365	0.269628688114612	0.767715895100587	1.45045655527835	2.2824560545142	11.9269288638716	0.484776139090395	3.74895832469096	8.35274362260543	9.64596354204718	15.1822867553605	0	5.42630375489618	21.599888942011	6.92903657456063	6.0349091013844	0	1.07181110709044	20.3680044192052	17.665596397724	0.753187073300093	1.42167953138196
ENSMUSG00000005732	Ranbp1	841.735595128316	921.09061446948	1106.28939767061	874.182519953176	1051.62853163818	665.365854608494	548.567241268494	867.411099526922	883.076729756927	768.65790502137	918.437112329516	915.06303031318	707.593457165131	853.628950081308	998.646115248368	830.654597690202	949.945485529182	828.723705211458	767.712681430223	782.133909853434	722.577729013938	677.835648046978	622.30842877746	984.540271293501	905.557855251832	947.307472463314	556.311707145407	711.985786462914	787.236200727483	651.457086493986	847.970047154024	1314.3045516037	885.376983153138	1089.74789778076	899.349896880225	1028.20361594178	822.115916899028	902.639853815757	846.513157019065	521.712197200632	993.331109153168	1140.46379156816	943.654080036051	1216.92223612325	884.776453672859	1044.51865544602	1262.63166558582	837.912912669112
ENSMUSG00000005763	Cd247	0	0	0	0	0	0	0	0	0	0	0	0	0	0	0	0	0	0	0	0	0	0	0	0	0	0	0	0	0	0	0	0	0	0	0	0	0	0	0	0	0	0	0	0	0	0	0	0
ENSMUSG00000005774	Rfx5	5.66208785707077	0	0	0	0	0	0	0	0	0	0	0	0	0	0	0	0	0	0	12.3057948772343	0	0	9.46735879790049	0	0	0	0	3.52386105358012	0	0	0	0	0	0	0	0	0	0	0	0	0	0	0	0	0	0	0	5.95664843786243
ENSMUSG00000005779	Psmb4	80.474523694085	49.0229949734889	88.0654157221157	182.96148760339	95.8334573580867	99.2397499793971	153.77731393599	74.4638603486892	138.897147000259	207.983308126419	93.2152584506928	68.1723245498645	127.661789271374	69.9785471992183	111.769585007501	137.774268512209	54.6461826337581	101.853878904843	175.968806170898	136.508379905596	57.200717364728	125.203923690642	37.7621817613885	124.543867266632	173.876488249997	63.3137141625109	75.1828200019343	73.1502907255442	152.365535890921	94.8427409488356	168.474828051296	157.491373625505	109.20607495376	86.5340911252098	81.9941976178588	39.93041068247	168.540113848943	89.3782724825993	212.686843716597	101.987109495046	247.991046783394	266.438680355145	132.134870920542	135.350240368167	116.530376630498	164.599786939606	95.6440453714982	66.0543206852138
ENSMUSG00000005800	Mmp8	0	0	0	0	0	0	0	0	0	0	0	0	0	0	0	0	0	0	0	0	0	0	0	0	0	0	0	0	0	0	0	0	0	0	0	0	0	0	0	0	0	0	0	0	0	0	0	0
ENSMUSG00000005802	Slc30a4	0	18.0906889890637	0	0	0	0	0	0	0	0	0	0	0	0	0	0	2.0384735755251	0	0	0	0	0	0	0	0	0	0	0	0	0	12.1135815975464	0	14.481161728766	9.12163036924562	0	0	0	0	0	0	31.6792098657367	0	0	0	0	0	0	2.84947939055315
ENSMUSG00000005803	Sqor	0	0	0	0	0	0	0	0	0	0	0	0	0	0	0	0	0	0	0	0	0	0	0	0	0	0	0	0	0	0	0	0	0	0	0	0	0	0	0	0	0	0	0	0	0	0	0	0
ENSMUSG00000005804	Bloc1s6	45.8561024858637	46.3451769305572	0	21.158483759755	26.9954602686638	0	50.1141039148731	0	0.113380112856773	0	0	46.1398576305276	84.0671965661178	78.8380350617248	36.6485210078156	43.5079529136109	0	66.3659601180638	0	0	0	67.7208535618208	15.3577154794144	34.3196663563604	0	0	0.9101693682237	16.1463602686515	0	32.228110477925	30.2574590434223	0	18.5215195495792	41.3956295598787	18.7807169243626	0	0	23.8246795798885	57.2735860494768	36.5546749708001	24.6102121812372	69.8352510302002	87.4350887591559	27.8808334766712	55.5504915290219	0	0	0
ENSMUSG00000005813	Metap1	45.0564146328414	13.6129905441143	0.604017860917969	14.504954405149	19.3600573864768	4.609922671662	6.62008537999188	1.09757479872474	10.1044356577956	12.8389022485106	36.2134140056771	0.173257757529464	30.2414225647324	10.6524907305129	0	21.4241987847211	18.2509182843826	13.2750253374282	0	20.2106557755897	0.230218874839782	0.0743261387860773	14.6452300508118	26.9141045829034	43.8239096625474	13.6500377374237	7.09750073340841	3.90668858047662	0.231740526621077	1.58713618460342	0.0529981279471265	20.9782555188909	11.0481520904713	1.76820288840893	0	0	10.9479951770262	5.23829468131496	8.03384573409421	0.0571936908953249	0.77227539070136	28.8254136848705	0.201245224953925	17.2767069742378	43.1712504599476	0.0846426421505461	0.0568387244958249	0.600801769962014
ENSMUSG00000005823	Gpr108	0	0	0	0	0.481544981985956	17.0682810651744	17.5588712438335	0.333392214843704	10.7615857095257	0	0	0	0	0	0	9.38812263347065	18.3088930131024	0	0	0	0	23.3444388168204	0	0	0	0	0	0	0	35.6586436010809	10.4478409747796	0	0	52.9363652319847	0	12.5393944941082	38.0691512372033	19.8363426277321	27.8858607170868	0	36.8781466402937	0	0	41.9435754310958	0.223293521520082	2.26252408612438	47.2887335542829	39.5754865177842
ENSMUSG00000005824	Tnfsf14	0	0	0	0	0	0	0	0	0	0	0	0	0	0	0	0	0	0	0	0	0	0	0	0	0	0	0	0	0	0	0	0	0	0	0	0	0	0	0	0	0	0	0	0	0	0	0	0
ENSMUSG00000005836	Gata6	0	0	0	0	0	0	0	0	0	0	0	0	0	0	0	0	0	0	0	0	0	0	4.31881150977849	0	0	0	0	0	0	0	0	0	0	0	0	16.3078056835717	0	0	0	0	19.4640478871194	0	0	0	16.8431407865453	0	0	0.0940516233503466
ENSMUSG00000005846	Rsl1d1	220.851907304196	414.981185025036	132.26721739	241.695708367463	233.220893201958	148.898526913077	175.607900695592	152.497408422541	111.398270662644	129.312930305708	291.676968723638	297.919450797638	294.941879607947	333.919142974147	384.334846736702	389.79106822018	422.674004328757	288.551131584998	274.247420105496	73.9532337546444	90.1044865543213	455.420413274921	289.625536931486	191.21474269843	195.277537952867	167.656318315223	160.044764840291	236.166072291877	273.357348385845	138.276349732179	122.074075931357	354.79190178096	190.984838077529	239.216394309636	214.035297121963	110.524933090783	145.427902646606	154.63305675233	309.99050460396	476.242593540256	215.071969967245	249.148705215936	250.798965022296	215.842061235389	320.084538582003	69.7983169549676	112.418841274736	161.907828619081
ENSMUSG00000005864	Cnga2	0	0	0	0	0	0	0	0	0	0	0	0	0	0	0	0	0	0	0	0	0	0	0	0	0	0	0	0	0	0	0	0	0	0	0	0	0	0	0	0	0	0	0	0	0	0	0	0
ENSMUSG00000005871	Apc	9.59352022351226	0.627310529128231	0.414801945079657	0	0	8.71981440773589	4.76130799671676	0	3.17106606889018	13.00173348212	13.0351041643067	0	0	8.36031475123226	0	0	3.10594767336746	0	0	0	0	3.83119562586775	0	0	21.6186223318491	0	0	4.71968304749545	0.128720218874781	6.32301642813132	0	0.615306503019222	0	3.33144554865594	8.34325585548425	2.07015003764065	5.4022451063895	5.32781828537504	0	0.406633236861321	1.80163274349489	0	0.447126444066995	1.23638272556504	0.29695926336861	0	0	0.0762777591521633
[truncated: 52,472 more rows]
[truncated: 43 more columns]
